# Supplementary material for: Causal relationships between gut microbiome and hundreds of age-related traits: evidence of a replicable effect on ApoM protein levels
Source: Aging (Albany NY). 2025 Aug 1;17(8):1966–87. doi: 10.18632/aging.206293 (PMC12422825; doi:10.18632/aging.206293)
Supplement: Supplementary Table 1 [file aging-17-8-206293-s002.xlsx]

## Sheet: Outline
What you can find in this file:
Supplementary Table 1. List of exposures and outcomes used in the MR analyses. This Excel table contains four sheets with the following content: (A) Exposures genome-wide association study (GWAS); (B) List of Outcomes GWAS; (C) List of GWAS used for replications; (D) List of structural variants used as exposure and extract from Zhernakova et al., 2024.

## Sheet: Supplementary Table 1A
Legend: Taxa and pathways from Lopera-Maya et al. (2022): "Effect of host genetics on the gut microbiome in 7,738 participants of the Dutch Microbiome Project." Discovery sample: 7,738 European ancestry individuals. (SNP: single nucleotide polymorphism, chr: chromosome, eaf: effect allele frequency) PMID: 35115690
Study accession	Exposure name	SNP	pval.exposure	chr.exposure	pos.exposure	effect_allele.exposure	other_allele.exposure	eaf.exposure	beta.exposure	se.exposure	gene	Type of trait	Download date
Taxa
GCST90027662	k__Bacteria.p__Actinobacteria.c__Actinobacteria.o__Bifidobacteriales.f__Bifidobacteriaceae	rs182549	5.85582e-15	2	136616754	T	C	0.755025	-0.153302	0.0196364	MCM6 (intronic);	Continuous	2024-05-05
GCST90027736	k__Bacteria.p__Actinobacteria.c__Actinobacteria.o__Bifidobacteriales	rs182549	5.91372e-15	2	136616754	T	C	0.755025	-0.153278	0.0196365	MCM6 (intronic);	Continuous	2024-05-05
GCST90027688	k__Bacteria.p__Actinobacteria.c__Actinobacteria.o__Bifidobacteriales.f__Bifidobacteriaceae.g__Bifidobacterium	rs182549	8.5872e-15	2	136616754	T	C	0.754899	-0.152231	0.0196209	MCM6 (intronic);	Continuous	2024-05-05
GCST90027755	k__Bacteria.p__Actinobacteria.c__Actinobacteria.o__Bifidobacteriales.f__Bifidobacteriaceae.g__Bifidobacterium.s__Bifidobacterium_bifidum	rs8176645	5.54034e-14	9	136149098	A	T	0.302548	-0.253949	0.0337764	ABO (intronic)	Continuous	2024-05-05
GCST90027754	k__Bacteria.p__Actinobacteria.c__Actinobacteria.o__Bifidobacteriales.f__Bifidobacteriaceae.g__Bifidobacterium.s__Bifidobacterium_adolescentis	rs6754311	7.06245e-14	2	136707982	C	T	0.251472	0.155851	0.020817	DARS1 (intronic)	Continuous	2024-05-05
GCST90027651	k__Bacteria.p__Actinobacteria.c__Actinobacteria	rs182549	2.32064e-13	2	136616754	T	C	0.756083	-0.139995	0.0191017	MCM6 (intronic);	Continuous	2024-05-05
GCST90027748	k__Bacteria.p__Actinobacteria	rs182549	2.32292e-13	2	136616754	T	C	0.756083	-0.139992	0.0191018	MCM6 (intronic);	Continuous	2024-05-05
GCST90027690	k__Bacteria.p__Actinobacteria.c__Actinobacteria.o__Coriobacteriales.f__Coriobacteriaceae.g__Collinsella	rs550057	9.34335e-11	9	136146597	T	C	0.25104	0.124063	0.0191538	ABO (intronic)	Continuous	2024-05-05
GCST90027663	k__Bacteria.p__Actinobacteria.c__Actinobacteria.o__Coriobacteriales.f__Coriobacteriaceae	rs550057	3.01242e-09	9	136146597	T	C	0.250228	0.110172	0.0185759	ABO (intronic)	Continuous	2024-05-05
GCST90027737	k__Bacteria.p__Actinobacteria.c__Actinobacteria.o__Coriobacteriales	rs550057	3.02942e-09	9	136146597	T	C	0.250228	0.110155	0.0185759	ABO (intronic)	Continuous	2024-05-05
GCST90027781	k__Bacteria.p__Bacteroidetes.c__Bacteroidia.o__Bacteroidales.f__Rikenellaceae.g__Alistipes.s__Alistipes_sp_AP11	rs28450200	1.37269e-08	8	15070111	T	C	0.826147	0.193309	0.0340527	SGCZ (intron)	Continuous	2024-05-05
GCST90027759	k__Bacteria.p__Actinobacteria.c__Actinobacteria.o__Coriobacteriales.f__Coriobacteriaceae.g__Collinsella.s__Collinsella_aerofaciens	rs550057	2.05314e-08	9	136146597	T	C	0.251842	0.108642	0.0193746	ABO (intronic)	Continuous	2024-05-05
GCST90027668	k__Bacteria.p__Bacteroidetes.c__Bacteroidia.o__Bacteroidales.f__Rikenellaceae	rs73344869	2.10469e-08	5	177746345	T	C	0.0745717	0.172423	0.0307724	COL23A1 (intron)	Continuous	2024-05-05
GCST90027701	k__Bacteria.p__Bacteroidetes.c__Bacteroidia.o__Bacteroidales.f__Rikenellaceae.g__Alistipes	rs73344869	2.14399e-08	5	177746345	T	C	0.0745717	0.172349	0.0307767	COL23A1 (intron)	Continuous	2024-05-05
GCST90027757	k__Bacteria.p__Actinobacteria.c__Actinobacteria.o__Bifidobacteriales.f__Bifidobacteriaceae.g__Bifidobacterium.s__Bifidobacterium_longum	rs1446585	3.1787e-08	2	136407479	G	A	0.22812	0.115634	0.0209054	RH3DM1 (missense)	Continuous	2024-05-05
GCST90027656	k__Bacteria.p__Firmicutes.c__Negativicutes	rs2282037	4.09789e-08	14	103588515	T	C	0.521969	-0.102233	0.0186334	TNFAIP2 (intronic); LINC0067 (intronic)	Continuous	2024-05-05
GCST90027742	k__Bacteria.p__Firmicutes.c__Negativicutes.o__Selenomonadales	rs2282037	4.10393e-08	14	103588515	T	C	0.521969	-0.102229	0.0186333	TNFAIP2 (intronic); LINC0067 (intronic)	Continuous	2024-05-05
GCST90027817	k__Bacteria.p__Proteobacteria.c__Gammaproteobacteria.o__Enterobacteriales.f__Enterobacteriaceae.g__Escherichia.s__Escherichia_unclassified	rs921896	4.14694e-08	X	32213962	C	T	0.464021	0.0934248	0.0170344	DMD (intron)	Continuous	2024-05-05
Pathways
GCST90027488	LACTOSECAT.PWY..lactose.and.galactose.degradation.I	rs507666	5.38226e-15	9	136149399	A	G	0.177602	0.16989	0.0217316	ABO (intron)	Continuous	2024-05-05
GCST90027572	PWY.6151..S.adenosyl.L.methionine.cycle.I	rs7513344	1.79283e-09	1	4220095	A	C	0.0865728	0.181259	0.0301318	EEF1DP6, LINC02780 (intragenic)	Continuous	2024-05-05
GCST90027635	PWY_REDCITCYC..TCA.cycle.VIII..helicobacter.	rs10159356	7.52353e-09	1	48103139	G	A	0.307959	-0.140708	0.024349	ATP6V0E1P4, LINC01738 (intragenic)	Continuous	2024-05-05
GCST90027538	PWY.5088..L.glutamate.degradation.VIII..to.propanoate.	rs9927590	9.27824e-09	16	78318743	T	C	0.0843884	-0.339265	0.0590702	WWOX (intragenic)	Continuous	2024-05-05
GCST90027616	PWY.7234..inosine.5..phosphate.biosynthesis.III	rs79676117	1.15583e-08	20	50415961	C	A	0.0501897	-0.211348	0.0370389	SALL4 (intron)	Continuous	2024-05-05
GCST90027596	PWY.6708..ubiquinol.8.biosynthesis..prokaryotic.	rs11898768	2.00185e-08	2	231419306	G	A	0.117282	0.2225	0.0396483	SP100, TPM3P8 (intragenic)	Continuous	2024-05-05
GCST90027494	P105.PWY..TCA.cycle.IV..2.oxoglutarate.decarboxylase.	rs36182340	2.00197e-08	7	155118470	T	G	0.903211	0.235877	0.0420321	BLACE, INSIG1 (intragenic)	Continuous	2024-05-05
GCST90027451	ASPASN.PWY..superpathway.of.L.aspartate.and.L.asparagine.biosynthesis	rs820496	2.43198e-08	9	6703997	A	C	0.545733	-0.0946927	0.0169759	LINC02851 (regulatory)	Continuous	2024-05-05
GCST90027588	PWY.6612..superpathway.of.tetrahydrofolate.biosynthesis	rs17824268	2.62792e-08	14	64467727	C	T	0.0775349	-0.207447	0.03728	SYNE2 (intron)	Continuous	2024-05-05
GCST90027638	PYRIDNUCSYN.PWY..NAD.biosynthesis.I..from.aspartate.	rs148280750	2.93321e-08	14	73763641	T	C	0.070665	-0.185296	0.0334145	NUMB (intron)	Continuous	2024-05-05
GCST90027628	PWY.841..superpathway.of.purine.nucleotides.de.novo.biosynthesis.I	rs1584586	3.47413e-08	3	150194351	A	G	0.346666	0.0920891	0.0166959	SERP1,TSC22D2 (intragenic)	Continuous	2024-05-05
GCST90027475	GLYCOCAT.PWY..glycogen.degradation.I..bacterial.	rs59657730	3.50158e-08	6	46422725	G	A	0.559955	0.110105	0.0199672	RCAN2 (intron)	Continuous	2024-05-05
GCST90027481	HISDEG.PWY..L.histidine.degradation.I	rs12137024	3.53134e-08	1	95409858	A	G	0.169299	0.118929	0.0215732	CNN3-DT (intragenic)	Continuous	2024-05-05
GCST90027463	ENTBACSYN.PWY..enterobactin.biosynthesis	rs11795855	3.59472e-08	X	140027569	A	G	0.717815	0.153425	0.0278465	MIR320D2, SPANXB1 (intragenic)	Continuous	2024-05-05
GCST90027647	TRPSYN.PWY..L.tryptophan.biosynthesis	rs142552274	3.8927e-08	1	1655474	A	G	0.453985	-0.10827	0.0197011	CDK11A (intron)	Continuous	2024-05-05
GCST90027579	PWY.6353..purine.nucleotides.degradation.II..aerobic.	rs2137304	4.25881e-08	8	23415240	A	G	0.0902271	-0.156047	0.028477	SLC25A37 (intron)	Continuous	2024-05-05
GCST90027482	HISTSYN.PWY..L.histidine.biosynthesis	rs78778914	4.33878e-08	1	150449701	C	T	0.0527473	0.211625	0.0386425	TARS2, RPRD2 (intragenic)	Continuous	2024-05-05
GCST90027571	PWY.6147..6.hydroxymethyl.dihydropterin.diphosphate.biosynthesis.I	rs2714053	4.84967e-08	11	123312063	G	A	0.598328	-0.0959623	0.017586	GRAMD1B (intron)	Continuous	2024-05-05
GCST90027612	PWY.7209..superpathway.of.pyrimidine.ribonucleosides.degradation	rs11242123	4.88754e-08	5	132025487	T	A	0.128552	-0.16115	0.0295398	IL4, KIF3A (intragenic)	Continuous	2024-05-05

## Sheet: Supplementary Table 1B
Legend: list of the age-related traits used as outcomes in the primary Mendelian randomization analysis, along with their GWAS entry accession, the name, the article from which data were generated, sample size, population and type of trait. GWAS: genome-wide assiciation study
Study accession	Outcome name	Data article	Sample size	Population	Type of Trait	Download date
GCST90043776	Age-related macular degeneration	Jiang et al., 2021 (PMID: 34737426)	456348: 1295 cases and 455053 controls	European (U.K.)	Binary (ICD-9-CM: 362.29, based on hospital record)	2024-05-09
GCST90239748	Cardiovascular ageing	Shah M. et al., 2023 (PMID: 37604819)	29506	European ancestry individuals	Continuous	2024-05-05
GCST005194	Coronary artery disease	van der Harst P et al., 2017 (PMID: 29212778)	296525: 34541 cases and 261984 controls	European ancestry individuals	Binary	2024-05-05
GCST90020053	Frailty	Atkins JL et al., 2021 (PMID: 34431594)	175226	European ancestry individuals	Continuous	2024-05-05
GCST007406	Health span	Zenin A et al., 2019 (PMID: 30729179)	300447	European (U.K.)	Continuous	2024-05-05
GCST006908	Ischemic stroke	Malik R. et al, 2018 (PMID: 29531354)	440,328: 34,217 cases and 406,111 controls	European ancestry individuals	Binary	2024-05-05
https://doi.org/10.7488/ds/2463 - Edinburgh DataShare	Lifespan	Timmers et al., 2019 (PMID: 30642433)	1012240	European ancestry individuals	Continuous	2024-05-05
GCST008598	Longevity 90th percentile	Deelen J et al., 2019 (PMID: 31413261)	36745: 11262 cases and 25483 controls	European ancestry individuals	Binary	2024-05-05
GCST008599	Longevity 99th percentile	Deelen J et al., 2019 (PMID: 31413261)	28967: 3484 cases and 25483 controls	European ancestry individuals	Binary	2024-05-20
GCST90038656	Osteoporosis	Dönertaş HM et al., 2021 (PMID: 33959723)	484598: 7751 cases and 476847 controls	European (U.K.)	Binary	2024-12-27
GCST006697	Parental longevity (combined parental attained age, Martingale residuals)	Pilling LC et al., 2017 (PMID: 29227965)	389166	European (U.K.)	Continuous	2024-12-23
GCST006698	Parental longevity (both parents in top 10%)	Pilling LC et al., 2017 (PMID: 29227965)	86949	European (U.K.)	Continuous	2024-12-23
GCST006699	Parental longevity (mother's age at death)	Pilling LC et al., 2017 (PMID: 29227965)	246941	European (U.K.)	Continuous	2024-12-23
GCST006696	Parental longevity (mother's attained age)	Pilling LC et al., 2017 (PMID: 29227965)	412937	European (U.K.)	Continuous	2024-12-23
GCST006700	Parental longevity (father's age at death)	Pilling LC et al., 2017 (PMID: 29227965)	317652	European (U.K.)	Continuous	2024-12-23
GCST006701	Parental longevity (father's attained age)	Pilling LC et al., 2017 (PMID: 29227965)	415311	European (U.K.)	Continuous	2024-12-23
GCST006702	Parental longevity (combined parental age at death)	Pilling LC et al., 2017 (PMID: 29227965)	208118	European (U.K.)	Continuous	2024-12-23
GCST90029024	Type 2 diabetes	Loh PR et al., 2018 (PMID: 29892013)	468298	European (U.K.)	Continuous	2024-05-05
Circulating inflammatory proteins
OID	Name	Data article	Sample size	Population	Type of Trait	Download date	UniProt	Assay	Panel
OID20159	Aggrecan core protein	Sun et al., 2023 (PMID: 37794186)	54219	European (U.K.)	Continuous	2025-05-06	P16112	ACAN	Cardiometabolic
OID20105	Angiotensin-converting enzyme 2	Sun et al., 2023 (PMID: 37794186)	54219	European (U.K.)	Continuous	2025-05-06	Q9BYF1	ACE2	Cardiometabolic
OID20124	Peroxisomal acyl-coenzyme A oxidase 1	Sun et al., 2023 (PMID: 37794186)	54219	European (U.K.)	Continuous	2025-05-06	Q15067	ACOX1	Cardiometabolic
OID20314	Tartrate-resistant acid phosphatase type 5	Sun et al., 2023 (PMID: 37794186)	54219	European (U.K.)	Continuous	2025-05-06	P13686	ACP5	Cardiometabolic
OID20079	Actin, aortic smooth muscle	Sun et al., 2023 (PMID: 37794186)	54219	European (U.K.)	Continuous	2025-05-06	P62736	ACTA2	Cardiometabolic
OID20435	Alpha-actinin-4	Sun et al., 2023 (PMID: 37794186)	54219	European (U.K.)	Continuous	2025-05-06	O43707	ACTN4	Inflammation
OID20137	Aminoacylase-1	Sun et al., 2023 (PMID: 37794186)	54219	European (U.K.)	Continuous	2025-05-06	Q03154	ACY1	Cardiometabolic
OID20645	Adenosine deaminase	Sun et al., 2023 (PMID: 37794186)	54219	European (U.K.)	Continuous	2025-05-06	P00813	ADA	Inflammation
OID20394	Adenosine deaminase 2	Sun et al., 2023 (PMID: 37794186)	54219	European (U.K.)	Continuous	2025-05-06	Q9NZK5	ADA2	Cardiometabolic
OID20109	Disintegrin and metalloproteinase domain-containing protein 15	Sun et al., 2023 (PMID: 37794186)	54219	European (U.K.)	Continuous	2025-05-06	Q13444	ADAM15	Cardiometabolic
OID20651	Disintegrin and metalloproteinase domain-containing protein 23	Sun et al., 2023 (PMID: 37794186)	54219	European (U.K.)	Continuous	2025-05-06	O75077	ADAM23	Inflammation
OID20249	A disintegrin and metalloproteinase with thrombospondin motifs 13	Sun et al., 2023 (PMID: 37794186)	54219	European (U.K.)	Continuous	2025-05-06	Q76LX8	ADAMTS13	Cardiometabolic
OID20089	A disintegrin and metalloproteinase with thrombospondin motifs 16	Sun et al., 2023 (PMID: 37794186)	54219	European (U.K.)	Continuous	2025-05-06	Q8TE57	ADAMTS16	Cardiometabolic
OID20755	Adhesion G protein-coupled receptor E2	Sun et al., 2023 (PMID: 37794186)	54219	European (U.K.)	Continuous	2025-05-06	Q9UHX3	ADGRE2	Inflammation
OID20260	CD97 antigen	Sun et al., 2023 (PMID: 37794186)	54219	European (U.K.)	Continuous	2025-05-06	P48960	ADGRE5	Cardiometabolic
OID20189	Adhesion G-protein coupled receptor G2	Sun et al., 2023 (PMID: 37794186)	54219	European (U.K.)	Continuous	2025-05-06	Q8IZP9	ADGRG2	Cardiometabolic
OID20117	All-trans-retinol dehydrogenase [NAD	Sun et al., 2023 (PMID: 37794186)	54219	European (U.K.)	Continuous	2025-05-06	P08319	ADH4	Cardiometabolic
OID20756	Advanced glycosylation end product-specific receptor	Sun et al., 2023 (PMID: 37794186)	54219	European (U.K.)	Continuous	2025-05-06	Q15109	AGER	Inflammation
OID20786	Agrin	Sun et al., 2023 (PMID: 37794186)	54219	European (U.K.)	Continuous	2025-05-06	O00468	AGRN	Inflammation
OID20658	Agouti-related protein	Sun et al., 2023 (PMID: 37794186)	54219	European (U.K.)	Continuous	2025-05-06	O00253	AGRP	Inflammation
OID20139	Serine--pyruvate aminotransferase	Sun et al., 2023 (PMID: 37794186)	54219	European (U.K.)	Continuous	2025-05-06	P21549	AGXT	Cardiometabolic
OID20199	Adenosylhomocysteinase	Sun et al., 2023 (PMID: 37794186)	54219	European (U.K.)	Continuous	2025-05-06	P23526	AHCY	Cardiometabolic
OID20122	Adenylate kinase isoenzyme 1	Sun et al., 2023 (PMID: 37794186)	54219	European (U.K.)	Continuous	2025-05-06	P00568	AK1	Cardiometabolic
OID20062	Aldo-keto reductase family 1 member C4	Sun et al., 2023 (PMID: 37794186)	54219	European (U.K.)	Continuous	2025-05-06	P17516	AKR1C4	Cardiometabolic
OID20273	CD166 antigen	Sun et al., 2023 (PMID: 37794186)	54219	European (U.K.)	Continuous	2025-05-06	Q13740	ALCAM	Cardiometabolic
OID20512	Aldehyde dehydrogenase, dimeric NADP-preferring	Sun et al., 2023 (PMID: 37794186)	54219	European (U.K.)	Continuous	2025-05-06	P30838	ALDH3A1	Inflammation
OID20437	Ameloblastin	Sun et al., 2023 (PMID: 37794186)	54219	European (U.K.)	Continuous	2025-05-06	Q9NP70	AMBN	Inflammation
OID20492	Protein amnionless [Cleaved into: Soluble protein amnionless]	Sun et al., 2023 (PMID: 37794186)	54219	European (U.K.)	Continuous	2025-05-06	Q9BXJ7	AMN	Inflammation
OID20333	Pancreatic alpha-amylase	Sun et al., 2023 (PMID: 37794186)	54219	European (U.K.)	Continuous	2025-05-06	P04746	AMY2A	Cardiometabolic
OID20340	Alpha-amylase 2B	Sun et al., 2023 (PMID: 37794186)	54219	European (U.K.)	Continuous	2025-05-06	P19961	AMY2B	Cardiometabolic
OID20403	Angiogenin	Sun et al., 2023 (PMID: 37794186)	54219	European (U.K.)	Continuous	2025-05-06	P03950	ANG	Cardiometabolic
OID20740	Angiopoietin-1	Sun et al., 2023 (PMID: 37794186)	54219	European (U.K.)	Continuous	2025-05-06	Q15389	ANGPT1	Inflammation
OID20211	Angiopoietin-related protein 1	Sun et al., 2023 (PMID: 37794186)	54219	European (U.K.)	Continuous	2025-05-06	O95841	ANGPTL1	Cardiometabolic
OID20726	Angiopoietin-related protein 2	Sun et al., 2023 (PMID: 37794186)	54219	European (U.K.)	Continuous	2025-05-06	Q9UKU9	ANGPTL2	Inflammation
OID20407	Angiopoietin-related protein 3	Sun et al., 2023 (PMID: 37794186)	54219	European (U.K.)	Continuous	2025-05-06	Q9Y5C1	ANGPTL3	Cardiometabolic
OID20703	Angiopoietin-related protein 4	Sun et al., 2023 (PMID: 37794186)	54219	European (U.K.)	Continuous	2025-05-06	Q9BY76	ANGPTL4	Inflammation
OID20350	Aminopeptidase N	Sun et al., 2023 (PMID: 37794186)	54219	European (U.K.)	Continuous	2025-05-06	P15144	ANPEP	Cardiometabolic
OID20583	Annexin A11	Sun et al., 2023 (PMID: 37794186)	54219	European (U.K.)	Continuous	2025-05-06	P50995	ANXA11	Inflammation
OID20123	Annexin A4	Sun et al., 2023 (PMID: 37794186)	54219	European (U.K.)	Continuous	2025-05-06	P09525	ANXA4	Cardiometabolic
OID20452	Amiloride-sensitive amine oxidase [copper-containing]	Sun et al., 2023 (PMID: 37794186)	54219	European (U.K.)	Continuous	2025-05-06	P19801	AOC1	Inflammation
OID20389	Membrane primary amine oxidase	Sun et al., 2023 (PMID: 37794186)	54219	European (U.K.)	Continuous	2025-05-06	Q16853	AOC3	Cardiometabolic
OID20164	Amyloid-like protein 1	Sun et al., 2023 (PMID: 37794186)	54219	European (U.K.)	Continuous	2025-05-06	P51693	APLP1	Cardiometabolic
OID20374	Apolipoprotein M	Sun et al., 2023 (PMID: 37794186)	54219	European (U.K.)	Continuous	2025-05-06	O95445	APOM	Cardiometabolic
OID20554	Rho guanine nucleotide exchange factor 12	Sun et al., 2023 (PMID: 37794186)	54219	European (U.K.)	Continuous	2025-05-06	Q9NZN5	ARHGEF12	Inflammation
OID20432	Aryl hydrocarbon receptor nuclear translocator	Sun et al., 2023 (PMID: 37794186)	54219	European (U.K.)	Continuous	2025-05-06	P27540	ARNT	Inflammation
OID20346	Ecto-ADP-ribosyltransferase 3	Sun et al., 2023 (PMID: 37794186)	54219	European (U.K.)	Continuous	2025-05-06	Q13508	ART3	Cardiometabolic
OID20446	Artemin	Sun et al., 2023 (PMID: 37794186)	54219	European (U.K.)	Continuous	2025-05-06	Q5T4W7	ARTN	Inflammation
OID20760	ATPase inhibitor, mitochondrial	Sun et al., 2023 (PMID: 37794186)	54219	European (U.K.)	Continuous	2025-05-06	Q9UII2	ATP5IF1	Inflammation
OID20582	Axin-1	Sun et al., 2023 (PMID: 37794186)	54219	European (U.K.)	Continuous	2025-05-06	O15169	AXIN1	Inflammation
OID20363	Tyrosine-protein kinase receptor UFO	Sun et al., 2023 (PMID: 37794186)	54219	European (U.K.)	Continuous	2025-05-06	P30530	AXL	Cardiometabolic
OID20309	Azurocidin	Sun et al., 2023 (PMID: 37794186)	54219	European (U.K.)	Continuous	2025-05-06	P20160	AZU1	Cardiometabolic
OID20780	Beta-1,4-galactosyltransferase 1	Sun et al., 2023 (PMID: 37794186)	54219	European (U.K.)	Continuous	2025-05-06	P15291	B4GALT1	Inflammation
OID20505	Transcription regulator protein BACH1	Sun et al., 2023 (PMID: 37794186)	54219	European (U.K.)	Continuous	2025-05-06	O14867	BACH1	Inflammation
OID20114	Large proline-rich protein BAG6	Sun et al., 2023 (PMID: 37794186)	54219	European (U.K.)	Continuous	2025-05-06	P46379	BAG6	Cardiometabolic
OID20594	B-cell scaffold protein with ankyrin repeats	Sun et al., 2023 (PMID: 37794186)	54219	European (U.K.)	Continuous	2025-05-06	Q8NDB2	BANK1	Inflammation
OID20513	Bcl-2-like protein 11	Sun et al., 2023 (PMID: 37794186)	54219	European (U.K.)	Continuous	2025-05-06	O43521-2	BCL2L11	Inflammation
OID20558	Breakpoint cluster region protein	Sun et al., 2023 (PMID: 37794186)	54219	European (U.K.)	Continuous	2025-05-06	P11274	BCR	Inflammation
OID20517	BH3-interacting domain death agonist	Sun et al., 2023 (PMID: 37794186)	54219	European (U.K.)	Continuous	2025-05-06	P55957	BID	Inflammation
OID20336	Bleomycin hydrolase	Sun et al., 2023 (PMID: 37794186)	54219	European (U.K.)	Continuous	2025-05-06	Q13867	BLMH	Cardiometabolic
OID20111	Bone morphogenetic protein 6	Sun et al., 2023 (PMID: 37794186)	54219	European (U.K.)	Continuous	2025-05-06	P22004	BMP6	Cardiometabolic
OID20116	Brother of CDO	Sun et al., 2023 (PMID: 37794186)	54219	European (U.K.)	Continuous	2025-05-06	Q9BWV1	BOC	Cardiometabolic
OID20308	BPI fold-containing family B member 1	Sun et al., 2023 (PMID: 37794186)	54219	European (U.K.)	Continuous	2025-05-06	Q8TDL5	BPIFB1	Cardiometabolic
OID20626	Basigin	Sun et al., 2023 (PMID: 37794186)	54219	European (U.K.)	Continuous	2025-05-06	P35613	BSG	Inflammation
OID20713	Butyrophilin subfamily 2 member A1	Sun et al., 2023 (PMID: 37794186)	54219	European (U.K.)	Continuous	2025-05-06	Q7KYR7	BTN2A1	Inflammation
OID20540	Butyrophilin subfamily 3 member A2	Sun et al., 2023 (PMID: 37794186)	54219	European (U.K.)	Continuous	2025-05-06	P78410	BTN3A2	Inflammation
OID20654	Complement C1q subcomponent subunit A	Sun et al., 2023 (PMID: 37794186)	54219	European (U.K.)	Continuous	2025-05-06	P02745	C1QA	Inflammation
OID20367	Complement C1q tumor necrosis factor-related protein 1	Sun et al., 2023 (PMID: 37794186)	54219	European (U.K.)	Continuous	2025-05-06	Q9BXJ1	C1QTNF1	Cardiometabolic
OID20410	Complement C2	Sun et al., 2023 (PMID: 37794186)	54219	European (U.K.)	Continuous	2025-05-06	P06681	C2	Cardiometabolic
OID20409	Carbonic anhydrase 1	Sun et al., 2023 (PMID: 37794186)	54219	European (U.K.)	Continuous	2025-05-06	P00915	CA1	Cardiometabolic
OID20225	Carbonic anhydrase 13	Sun et al., 2023 (PMID: 37794186)	54219	European (U.K.)	Continuous	2025-05-06	Q8N1Q1	CA13	Cardiometabolic
OID20271	Carbonic anhydrase 3	Sun et al., 2023 (PMID: 37794186)	54219	European (U.K.)	Continuous	2025-05-06	P07451	CA3	Cardiometabolic
OID20241	Carbonic anhydrase 4	Sun et al., 2023 (PMID: 37794186)	54219	European (U.K.)	Continuous	2025-05-06	P22748	CA4	Cardiometabolic
OID20075	Carbonic anhydrase 5A, mitochondrial	Sun et al., 2023 (PMID: 37794186)	54219	European (U.K.)	Continuous	2025-05-06	P35218	CA5A	Cardiometabolic
OID20181	Soluble calcium-activated nucleotidase 1	Sun et al., 2023 (PMID: 37794186)	54219	European (U.K.)	Continuous	2025-05-06	Q8WVQ1	CANT1	Cardiometabolic
OID20555	Caspase-2	Sun et al., 2023 (PMID: 37794186)	54219	European (U.K.)	Continuous	2025-05-06	P42575	CASP2	Inflammation
OID20305	Caspase-3	Sun et al., 2023 (PMID: 37794186)	54219	European (U.K.)	Continuous	2025-05-06	P42574	CASP3	Cardiometabolic
OID20179	Cobalamin binding intrinsic factor	Sun et al., 2023 (PMID: 37794186)	54219	European (U.K.)	Continuous	2025-05-06	P27352	CBLIF	Cardiometabolic
OID20226	Coiled-coil domain-containing protein 80	Sun et al., 2023 (PMID: 37794186)	54219	European (U.K.)	Continuous	2025-05-06	Q76M96	CCDC80	Cardiometabolic
OID20668	Eotaxin	Sun et al., 2023 (PMID: 37794186)	54219	European (U.K.)	Continuous	2025-05-06	P51671	CCL11	Inflammation
OID20655	C-C motif chemokine 13	Sun et al., 2023 (PMID: 37794186)	54219	European (U.K.)	Continuous	2025-05-06	Q99616	CCL13	Inflammation
OID20401	C-C motif chemokine 14	Sun et al., 2023 (PMID: 37794186)	54219	European (U.K.)	Continuous	2025-05-06	Q16627	CCL14	Cardiometabolic
OID20328	C-C motif chemokine 15	Sun et al., 2023 (PMID: 37794186)	54219	European (U.K.)	Continuous	2025-05-06	Q16663	CCL15	Cardiometabolic
OID20334	C-C motif chemokine 16	Sun et al., 2023 (PMID: 37794186)	54219	European (U.K.)	Continuous	2025-05-06	O15467	CCL16	Cardiometabolic
OID20745	C-C motif chemokine 17	Sun et al., 2023 (PMID: 37794186)	54219	European (U.K.)	Continuous	2025-05-06	Q92583	CCL17	Inflammation
OID20395	C-C motif chemokine 18	Sun et al., 2023 (PMID: 37794186)	54219	European (U.K.)	Continuous	2025-05-06	P55774	CCL18	Cardiometabolic
OID20671	C-C motif chemokine 20	Sun et al., 2023 (PMID: 37794186)	54219	European (U.K.)	Continuous	2025-05-06	P78556	CCL20	Inflammation
OID20686	C-C motif chemokine 21	Sun et al., 2023 (PMID: 37794186)	54219	European (U.K.)	Continuous	2025-05-06	O00585	CCL21	Inflammation
OID20765	C-C motif chemokine 22	Sun et al., 2023 (PMID: 37794186)	54219	European (U.K.)	Continuous	2025-05-06	O00626	CCL22	Inflammation
OID20693	C-C motif chemokine 23	Sun et al., 2023 (PMID: 37794186)	54219	European (U.K.)	Continuous	2025-05-06	P55773	CCL23	Inflammation
OID20772	C-C motif chemokine 24	Sun et al., 2023 (PMID: 37794186)	54219	European (U.K.)	Continuous	2025-05-06	O00175	CCL24	Inflammation
OID20674	C-C motif chemokine 25	Sun et al., 2023 (PMID: 37794186)	54219	European (U.K.)	Continuous	2025-05-06	O15444	CCL25	Inflammation
OID20546	C-C motif chemokine 26	Sun et al., 2023 (PMID: 37794186)	54219	European (U.K.)	Continuous	2025-05-06	Q9Y258	CCL26	Inflammation
OID20121	C-C motif chemokine 27	Sun et al., 2023 (PMID: 37794186)	54219	European (U.K.)	Continuous	2025-05-06	Q9Y4X3	CCL27	Cardiometabolic
OID20569	C-C motif chemokine 28	Sun et al., 2023 (PMID: 37794186)	54219	European (U.K.)	Continuous	2025-05-06	Q9NRJ3	CCL28	Inflammation
OID20610	C-C motif chemokine 3	Sun et al., 2023 (PMID: 37794186)	54219	European (U.K.)	Continuous	2025-05-06	P10147	CCL3	Inflammation
OID20695	C-C motif chemokine 4	Sun et al., 2023 (PMID: 37794186)	54219	European (U.K.)	Continuous	2025-05-06	P13236	CCL4	Inflammation
OID20412	C-C motif chemokine 5	Sun et al., 2023 (PMID: 37794186)	54219	European (U.K.)	Continuous	2025-05-06	P13501	CCL5	Cardiometabolic
OID20523	C-C motif chemokine 7	Sun et al., 2023 (PMID: 37794186)	54219	European (U.K.)	Continuous	2025-05-06	P80098	CCL7	Inflammation
OID20709	CCN family member 2	Sun et al., 2023 (PMID: 37794186)	54219	European (U.K.)	Continuous	2025-05-06	P29279	CCN2	Inflammation
OID20299	CCN family member 3	Sun et al., 2023 (PMID: 37794186)	54219	European (U.K.)	Continuous	2025-05-06	P48745	CCN3	Cardiometabolic
OID20378	Monocyte differentiation antigen CD14	Sun et al., 2023 (PMID: 37794186)	54219	European (U.K.)	Continuous	2025-05-06	P08571	CD14	Cardiometabolic
OID20647	CD160 antigen	Sun et al., 2023 (PMID: 37794186)	54219	European (U.K.)	Continuous	2025-05-06	O95971	CD160	Inflammation
OID20360	Scavenger receptor cysteine-rich type 1 protein M130	Sun et al., 2023 (PMID: 37794186)	54219	European (U.K.)	Continuous	2025-05-06	Q86VB7	CD163	Cardiometabolic
OID20603	OX-2 membrane glycoprotein	Sun et al., 2023 (PMID: 37794186)	54219	European (U.K.)	Continuous	2025-05-06	P41217	CD200	Inflammation
OID20595	Cell surface glycoprotein CD200 receptor 1	Sun et al., 2023 (PMID: 37794186)	54219	European (U.K.)	Continuous	2025-05-06	Q8TD46	CD200R1	Inflammation
OID20262	CD209 antigen	Sun et al., 2023 (PMID: 37794186)	54219	European (U.K.)	Continuous	2025-05-06	Q9NNX6	CD209	Cardiometabolic
OID20637	B-cell receptor CD22	Sun et al., 2023 (PMID: 37794186)	54219	European (U.K.)	Continuous	2025-05-06	P20273	CD22	Inflammation
OID20628	Natural killer cell receptor 2B4	Sun et al., 2023 (PMID: 37794186)	54219	European (U.K.)	Continuous	2025-05-06	Q9BZW8	CD244	Inflammation
OID20680	CD276 antigen	Sun et al., 2023 (PMID: 37794186)	54219	European (U.K.)	Continuous	2025-05-06	Q5ZPR3	CD276	Inflammation
OID20177	CD2-associated protein	Sun et al., 2023 (PMID: 37794186)	54219	European (U.K.)	Continuous	2025-05-06	Q9Y5K6	CD2AP	Cardiometabolic
OID20584	T-cell surface glycoprotein CD4	Sun et al., 2023 (PMID: 37794186)	54219	European (U.K.)	Continuous	2025-05-06	P01730	CD4	Inflammation
OID20724	Tumor necrosis factor receptor superfamily member 5	Sun et al., 2023 (PMID: 37794186)	54219	European (U.K.)	Continuous	2025-05-06	P25942	CD40	Inflammation
OID20616	CD40 ligand	Sun et al., 2023 (PMID: 37794186)	54219	European (U.K.)	Continuous	2025-05-06	P29965	CD40LG	Inflammation
OID20380	Membrane cofactor protein	Sun et al., 2023 (PMID: 37794186)	54219	European (U.K.)	Continuous	2025-05-06	P15529	CD46	Cardiometabolic
OID20692	CD48 antigen	Sun et al., 2023 (PMID: 37794186)	54219	European (U.K.)	Continuous	2025-05-06	P09326	CD48	Inflammation
OID20377	Complement decay-accelerating factor	Sun et al., 2023 (PMID: 37794186)	54219	European (U.K.)	Continuous	2025-05-06	P08174	CD55	Cardiometabolic
OID20716	Lymphocyte function-associated antigen 3	Sun et al., 2023 (PMID: 37794186)	54219	European (U.K.)	Continuous	2025-05-06	P19256	CD58	Inflammation
OID20339	CD59 glycoprotein	Sun et al., 2023 (PMID: 37794186)	54219	European (U.K.)	Continuous	2025-05-06	P13987	CD59	Cardiometabolic
OID20649	T-cell differentiation antigen CD6	Sun et al., 2023 (PMID: 37794186)	54219	European (U.K.)	Continuous	2025-05-06	P30203	CD6	Inflammation
OID20206	Early activation antigen CD69	Sun et al., 2023 (PMID: 37794186)	54219	European (U.K.)	Continuous	2025-05-06	Q07108	CD69	Cardiometabolic
OID20599	CD70 antigen	Sun et al., 2023 (PMID: 37794186)	54219	European (U.K.)	Continuous	2025-05-06	P32970	CD70	Inflammation
OID20635	B-cell antigen receptor complex-associated protein beta chain	Sun et al., 2023 (PMID: 37794186)	54219	European (U.K.)	Continuous	2025-05-06	P40259	CD79B	Inflammation
OID20565	CD83 antigen	Sun et al., 2023 (PMID: 37794186)	54219	European (U.K.)	Continuous	2025-05-06	Q01151	CD83	Inflammation
OID20607	SLAM family member 5	Sun et al., 2023 (PMID: 37794186)	54219	European (U.K.)	Continuous	2025-05-06	Q9UIB8	CD84	Inflammation
OID20397	Complement component C1q receptor	Sun et al., 2023 (PMID: 37794186)	54219	European (U.K.)	Continuous	2025-05-06	Q9NPY3	CD93	Cardiometabolic
OID20353	Cadherin-1	Sun et al., 2023 (PMID: 37794186)	54219	European (U.K.)	Continuous	2025-05-06	P12830	CDH1	Cardiometabolic
OID20134	Cadherin-17	Sun et al., 2023 (PMID: 37794186)	54219	European (U.K.)	Continuous	2025-05-06	Q12864	CDH17	Cardiometabolic
OID20170	Cadherin-2	Sun et al., 2023 (PMID: 37794186)	54219	European (U.K.)	Continuous	2025-05-06	P19022	CDH2	Cardiometabolic
OID20243	Cadherin-5	Sun et al., 2023 (PMID: 37794186)	54219	European (U.K.)	Continuous	2025-05-06	P33151	CDH5	Cardiometabolic
OID20157	Cadherin-6	Sun et al., 2023 (PMID: 37794186)	54219	European (U.K.)	Continuous	2025-05-06	P55285	CDH6	Cardiometabolic
OID20193	Cadherin-related family member 5	Sun et al., 2023 (PMID: 37794186)	54219	European (U.K.)	Continuous	2025-05-06	Q9HBB8	CDHR5	Cardiometabolic
OID20754	Cell adhesion molecule-related/down-regulated by oncogenes	Sun et al., 2023 (PMID: 37794186)	54219	European (U.K.)	Continuous	2025-05-06	Q4KMG0	CDON	Inflammation
OID20667	Corneodesmosin	Sun et al., 2023 (PMID: 37794186)	54219	European (U.K.)	Continuous	2025-05-06	Q15517	CDSN	Inflammation
OID20548	Carcinoembryonic antigen-related cell adhesion molecule 21	Sun et al., 2023 (PMID: 37794186)	54219	European (U.K.)	Continuous	2025-05-06	Q3KPI0	CEACAM21	Inflammation
OID20102	Carcinoembryonic antigen-related cell adhesion molecule 8	Sun et al., 2023 (PMID: 37794186)	54219	European (U.K.)	Continuous	2025-05-06	P31997	CEACAM8	Cardiometabolic
OID20052	CCAAT/enhancer-binding protein beta	Sun et al., 2023 (PMID: 37794186)	54219	European (U.K.)	Continuous	2025-05-06	P17676	CEBPB	Cardiometabolic
OID20298	Chymotrypsin-like elastase family member 3A	Sun et al., 2023 (PMID: 37794186)	54219	European (U.K.)	Continuous	2025-05-06	P09093	CELA3A	Cardiometabolic
OID20441	Centrosomal protein of 164 kDa	Sun et al., 2023 (PMID: 37794186)	54219	European (U.K.)	Continuous	2025-05-06	Q9UPV0	CEP164	Inflammation
OID20084	FGFR1 oncogene partner	Sun et al., 2023 (PMID: 37794186)	54219	European (U.K.)	Continuous	2025-05-06	O95684	CEP43	Cardiometabolic
OID20244	Liver carboxylesterase 1	Sun et al., 2023 (PMID: 37794186)	54219	European (U.K.)	Continuous	2025-05-06	P23141	CES1	Cardiometabolic
OID20152	Cell growth regulator with EF hand domain protein 1	Sun et al., 2023 (PMID: 37794186)	54219	European (U.K.)	Continuous	2025-05-06	Q99674	CGREF1	Cardiometabolic
OID20054	Serine/threonine-protein kinase Chk2	Sun et al., 2023 (PMID: 37794186)	54219	European (U.K.)	Continuous	2025-05-06	O96017	CHEK2	Cardiometabolic
OID20399	Chitinase-3-like protein 1	Sun et al., 2023 (PMID: 37794186)	54219	European (U.K.)	Continuous	2025-05-06	P36222	CHI3L1	Cardiometabolic
OID20312	Chitotriosidase-1	Sun et al., 2023 (PMID: 37794186)	54219	European (U.K.)	Continuous	2025-05-06	Q13231	CHIT1	Cardiometabolic
OID20366	Neural cell adhesion molecule L1-like protein	Sun et al., 2023 (PMID: 37794186)	54219	European (U.K.)	Continuous	2025-05-06	O00533	CHL1	Cardiometabolic
OID20771	Chordin-like protein 1	Sun et al., 2023 (PMID: 37794186)	54219	European (U.K.)	Continuous	2025-05-06	Q9BU40	CHRDL1	Inflammation
OID20223	Chordin-like protein 2	Sun et al., 2023 (PMID: 37794186)	54219	European (U.K.)	Continuous	2025-05-06	Q6WN34	CHRDL2	Cardiometabolic
OID20617	Cytoskeleton-associated protein 4	Sun et al., 2023 (PMID: 37794186)	54219	European (U.K.)	Continuous	2025-05-06	Q07065	CKAP4	Inflammation
OID20721	Creatine kinase U-type, mitochondrial	Sun et al., 2023 (PMID: 37794186)	54219	European (U.K.)	Continuous	2025-05-06	P12532	CKMT1A_CKMT1B	Inflammation
OID20126	Galectin-10	Sun et al., 2023 (PMID: 37794186)	54219	European (U.K.)	Continuous	2025-05-06	Q05315	CLC	Cardiometabolic
OID20099	C-type lectin domain family 1 member A	Sun et al., 2023 (PMID: 37794186)	54219	European (U.K.)	Continuous	2025-05-06	Q8NC01	CLEC1A	Cardiometabolic
OID20573	C-type lectin domain family 4 member A	Sun et al., 2023 (PMID: 37794186)	54219	European (U.K.)	Continuous	2025-05-06	Q9UMR7	CLEC4A	Inflammation
OID20547	C-type lectin domain family 4 member C	Sun et al., 2023 (PMID: 37794186)	54219	European (U.K.)	Continuous	2025-05-06	Q8WTT0	CLEC4C	Inflammation
OID20609	C-type lectin domain family 4 member D	Sun et al., 2023 (PMID: 37794186)	54219	European (U.K.)	Continuous	2025-05-06	Q8WXI8	CLEC4D	Inflammation
OID20590	C-type lectin domain family 4 member G	Sun et al., 2023 (PMID: 37794186)	54219	European (U.K.)	Continuous	2025-05-06	Q6UXB4	CLEC4G	Inflammation
OID20165	C-type lectin domain family 5 member A	Sun et al., 2023 (PMID: 37794186)	54219	European (U.K.)	Continuous	2025-05-06	Q9NY25	CLEC5A	Cardiometabolic
OID20636	C-type lectin domain family 7 member A	Sun et al., 2023 (PMID: 37794186)	54219	European (U.K.)	Continuous	2025-05-06	Q9BXN2	CLEC7A	Inflammation
OID20559	CAP-Gly domain-containing linker protein 2	Sun et al., 2023 (PMID: 37794186)	54219	European (U.K.)	Continuous	2025-05-06	Q9UDT6	CLIP2	Inflammation
OID20664	Calsyntenin-2	Sun et al., 2023 (PMID: 37794186)	54219	European (U.K.)	Continuous	2025-05-06	Q9H4D0	CLSTN2	Inflammation
OID20118	Clathrin light chain A	Sun et al., 2023 (PMID: 37794186)	54219	European (U.K.)	Continuous	2025-05-06	P09496	CLTA	Cardiometabolic
OID20198	Clusterin-like protein 1	Sun et al., 2023 (PMID: 37794186)	54219	European (U.K.)	Continuous	2025-05-06	Q15846	CLUL1	Cardiometabolic
OID20347	Beta-Ala-His dipeptidase	Sun et al., 2023 (PMID: 37794186)	54219	European (U.K.)	Continuous	2025-05-06	Q96KN2	CNDP1	Cardiometabolic
OID20069	Protein canopy homolog 2	Sun et al., 2023 (PMID: 37794186)	54219	European (U.K.)	Continuous	2025-05-06	Q9Y2B0	CNPY2	Cardiometabolic
OID20127	Consortin	Sun et al., 2023 (PMID: 37794186)	54219	European (U.K.)	Continuous	2025-05-06	Q6PJW8	CNST	Cardiometabolic
OID20307	Contactin-1	Sun et al., 2023 (PMID: 37794186)	54219	European (U.K.)	Continuous	2025-05-06	Q12860	CNTN1	Cardiometabolic
OID20556	Contactin-associated protein-like 2	Sun et al., 2023 (PMID: 37794186)	54219	European (U.K.)	Continuous	2025-05-06	Q9UHC6	CNTNAP2	Inflammation
OID20332	Collagen alpha-1	Sun et al., 2023 (PMID: 37794186)	54219	European (U.K.)	Continuous	2025-05-06	P39060	COL18A1	Cardiometabolic
OID20335	Collagen alpha-1	Sun et al., 2023 (PMID: 37794186)	54219	European (U.K.)	Continuous	2025-05-06	P02452	COL1A1	Cardiometabolic
OID20208	Collagen alpha-1	Sun et al., 2023 (PMID: 37794186)	54219	European (U.K.)	Continuous	2025-05-06	P02462	COL4A1	Cardiometabolic
OID20292	Collagen alpha-3	Sun et al., 2023 (PMID: 37794186)	54219	European (U.K.)	Continuous	2025-05-06	P12111	COL6A3	Cardiometabolic
OID20550	Collagen alpha-1	Sun et al., 2023 (PMID: 37794186)	54219	European (U.K.)	Continuous	2025-05-06	P20849	COL9A1	Inflammation
OID20738	Collectin-12	Sun et al., 2023 (PMID: 37794186)	54219	European (U.K.)	Continuous	2025-05-06	Q5KU26	COLEC12	Inflammation
OID20405	Cartilage oligomeric matrix protein	Sun et al., 2023 (PMID: 37794186)	54219	European (U.K.)	Continuous	2025-05-06	P49747	COMP	Cardiometabolic
OID20086	Catechol O-methyltransferase	Sun et al., 2023 (PMID: 37794186)	54219	European (U.K.)	Continuous	2025-05-06	P21964	COMT	Cardiometabolic
OID20286	Coronin-1A	Sun et al., 2023 (PMID: 37794186)	54219	European (U.K.)	Continuous	2025-05-06	P31146	CORO1A	Cardiometabolic
OID20280	Carboxypeptidase A1	Sun et al., 2023 (PMID: 37794186)	54219	European (U.K.)	Continuous	2025-05-06	P15085	CPA1	Cardiometabolic
OID20289	Carboxypeptidase B	Sun et al., 2023 (PMID: 37794186)	54219	European (U.K.)	Continuous	2025-05-06	P15086	CPB1	Cardiometabolic
OID20393	Complement receptor type 2	Sun et al., 2023 (PMID: 37794186)	54219	European (U.K.)	Continuous	2025-05-06	P20023	CR2	Cardiometabolic
OID20751	Protein disulfide isomerase CRELD2	Sun et al., 2023 (PMID: 37794186)	54219	European (U.K.)	Continuous	2025-05-06	Q6UXH1	CRELD2	Inflammation
OID20747	Corticotropin-releasing factor-binding protein	Sun et al., 2023 (PMID: 37794186)	54219	European (U.K.)	Continuous	2025-05-06	P24387	CRHBP	Inflammation
OID20055	Corticotropin-releasing factor receptor 1	Sun et al., 2023 (PMID: 37794186)	54219	European (U.K.)	Continuous	2025-05-06	P34998	CRHR1	Cardiometabolic
OID20701	Cysteine-rich motor neuron 1 protein	Sun et al., 2023 (PMID: 37794186)	54219	European (U.K.)	Continuous	2025-05-06	Q9NZV1	CRIM1	Inflammation
OID20742	Crk-like protein	Sun et al., 2023 (PMID: 37794186)	54219	European (U.K.)	Continuous	2025-05-06	P46109	CRKL	Inflammation
OID20699	Cytokine receptor-like factor 1	Sun et al., 2023 (PMID: 37794186)	54219	European (U.K.)	Continuous	2025-05-06	O75462	CRLF1	Inflammation
OID20279	Cartilage acidic protein 1	Sun et al., 2023 (PMID: 37794186)	54219	European (U.K.)	Continuous	2025-05-06	Q9NQ79	CRTAC1	Cardiometabolic
OID20070	Cone-rod homeobox protein	Sun et al., 2023 (PMID: 37794186)	54219	European (U.K.)	Continuous	2025-05-06	O43186	CRX	Cardiometabolic
OID20719	Macrophage colony-stimulating factor 1	Sun et al., 2023 (PMID: 37794186)	54219	European (U.K.)	Continuous	2025-05-06	P09603	CSF1	Inflammation
OID20491	Granulocyte colony-stimulating factor	Sun et al., 2023 (PMID: 37794186)	54219	European (U.K.)	Continuous	2025-05-06	P09919	CSF3	Inflammation
OID20400	Cystatin-C	Sun et al., 2023 (PMID: 37794186)	54219	European (U.K.)	Continuous	2025-05-06	P01034	CST3	Cardiometabolic
OID20293	Cystatin-M	Sun et al., 2023 (PMID: 37794186)	54219	European (U.K.)	Continuous	2025-05-06	Q15828	CST6	Cardiometabolic
OID20704	Cystatin-F	Sun et al., 2023 (PMID: 37794186)	54219	European (U.K.)	Continuous	2025-05-06	O76096	CST7	Inflammation
OID20294	Cystatin-B	Sun et al., 2023 (PMID: 37794186)	54219	European (U.K.)	Continuous	2025-05-06	P04080	CSTB	Cardiometabolic
OID20061	Cardiotrophin-1	Sun et al., 2023 (PMID: 37794186)	54219	European (U.K.)	Continuous	2025-05-06	Q16619	CTF1	Cardiometabolic
OID20752	Chymotrypsin-C	Sun et al., 2023 (PMID: 37794186)	54219	European (U.K.)	Continuous	2025-05-06	Q99895	CTRC	Inflammation
OID20276	Cathepsin B	Sun et al., 2023 (PMID: 37794186)	54219	European (U.K.)	Continuous	2025-05-06	P07858	CTSB	Cardiometabolic
OID20679	Dipeptidyl peptidase 1	Sun et al., 2023 (PMID: 37794186)	54219	European (U.K.)	Continuous	2025-05-06	P53634	CTSC	Inflammation
OID20358	Cathepsin D	Sun et al., 2023 (PMID: 37794186)	54219	European (U.K.)	Continuous	2025-05-06	P07339	CTSD	Cardiometabolic
OID20113	Pro-cathepsin H [Cleaved into: Cathepsin H mini chain; Cathepsin H	Sun et al., 2023 (PMID: 37794186)	54219	European (U.K.)	Continuous	2025-05-06	P09668	CTSH	Cardiometabolic
OID20228	Cathepsin L1	Sun et al., 2023 (PMID: 37794186)	54219	European (U.K.)	Continuous	2025-05-06	P07711	CTSL	Cardiometabolic
OID20660	Cathepsin O	Sun et al., 2023 (PMID: 37794186)	54219	European (U.K.)	Continuous	2025-05-06	P43234	CTSO	Inflammation
OID20365	Cathepsin Z	Sun et al., 2023 (PMID: 37794186)	54219	European (U.K.)	Continuous	2025-05-06	Q9UBR2	CTSZ	Cardiometabolic
OID20561	Coxsackievirus and adenovirus receptor	Sun et al., 2023 (PMID: 37794186)	54219	European (U.K.)	Continuous	2025-05-06	P78310	CXADR	Inflammation
OID20762	Growth-regulated alpha protein	Sun et al., 2023 (PMID: 37794186)	54219	European (U.K.)	Continuous	2025-05-06	P09341	CXCL1	Inflammation
OID20697	C-X-C motif chemokine 10	Sun et al., 2023 (PMID: 37794186)	54219	European (U.K.)	Continuous	2025-05-06	P02778	CXCL10	Inflammation
OID20464	Stromal cell-derived factor 1	Sun et al., 2023 (PMID: 37794186)	54219	European (U.K.)	Continuous	2025-05-06	P48061	CXCL12	Inflammation
OID20458	C-X-C motif chemokine 14	Sun et al., 2023 (PMID: 37794186)	54219	European (U.K.)	Continuous	2025-05-06	O95715	CXCL14	Inflammation
OID20282	C-X-C motif chemokine 16	Sun et al., 2023 (PMID: 37794186)	54219	European (U.K.)	Continuous	2025-05-06	Q9H2A7	CXCL16	Cardiometabolic
OID20622	C-X-C motif chemokine 17	Sun et al., 2023 (PMID: 37794186)	54219	European (U.K.)	Continuous	2025-05-06	Q6UXB2	CXCL17	Inflammation
OID20788	C-X-C motif chemokine 3	Sun et al., 2023 (PMID: 37794186)	54219	European (U.K.)	Continuous	2025-05-06	P19876	CXCL3	Inflammation
OID20207	C-X-C motif chemokine 5	Sun et al., 2023 (PMID: 37794186)	54219	European (U.K.)	Continuous	2025-05-06	P42830	CXCL5	Cardiometabolic
OID20613	C-X-C motif chemokine 6	Sun et al., 2023 (PMID: 37794186)	54219	European (U.K.)	Continuous	2025-05-06	P80162	CXCL6	Inflammation
OID20153	Interleukin-8	Sun et al., 2023 (PMID: 37794186)	54219	European (U.K.)	Continuous	2025-05-06	P10145	CXCL8	Cardiometabolic
OID20631	Interleukin-8	Sun et al., 2023 (PMID: 37794186)	54219	European (U.K.)	Continuous	2025-05-06	P10145	CXCL8	Inflammation
OID20675	C-X-C motif chemokine 9	Sun et al., 2023 (PMID: 37794186)	54219	European (U.K.)	Continuous	2025-05-06	Q07325	CXCL9	Inflammation
OID20774	Dystroglycan	Sun et al., 2023 (PMID: 37794186)	54219	European (U.K.)	Continuous	2025-05-06	Q14118	DAG1	Inflammation
OID20524	Dual adapter for phosphotyrosine and 3-phosphotyrosine and 3-phosphoinositide	Sun et al., 2023 (PMID: 37794186)	54219	European (U.K.)	Continuous	2025-05-06	Q9UN19	DAPP1	Inflammation
OID20681	Drebrin-like protein	Sun et al., 2023 (PMID: 37794186)	54219	European (U.K.)	Continuous	2025-05-06	Q9UJU6	DBNL	Inflammation
OID20106	Decorin	Sun et al., 2023 (PMID: 37794186)	54219	European (U.K.)	Continuous	2025-05-06	P07585	DCN	Cardiometabolic
OID20148	dCTP pyrophosphatase 1	Sun et al., 2023 (PMID: 37794186)	54219	European (U.K.)	Continuous	2025-05-06	Q9H773	DCTPP1	Cardiometabolic
OID20215	Aromatic-L-amino-acid decarboxylase	Sun et al., 2023 (PMID: 37794186)	54219	European (U.K.)	Continuous	2025-05-06	P20711	DDC	Cardiometabolic
OID20579	2,4-dienoyl-CoA reductase, mitochondrial	Sun et al., 2023 (PMID: 37794186)	54219	European (U.K.)	Continuous	2025-05-06	Q16698	DECR1	Inflammation
OID20344	Neutrophil defensin 1	Sun et al., 2023 (PMID: 37794186)	54219	European (U.K.)	Continuous	2025-05-06	P59665	DEFA1_DEFA1B	Cardiometabolic
OID20620	DNA fragmentation factor subunit alpha	Sun et al., 2023 (PMID: 37794186)	54219	European (U.K.)	Continuous	2025-05-06	O00273	DFFA	Inflammation
OID20466	Diacylglycerol kinase zeta	Sun et al., 2023 (PMID: 37794186)	54219	European (U.K.)	Continuous	2025-05-06	Q13574	DGKZ	Inflammation
OID20184	Diablo homolog, mitochondrial	Sun et al., 2023 (PMID: 37794186)	54219	European (U.K.)	Continuous	2025-05-06	Q9NR28	DIABLO	Cardiometabolic
OID20264	Dickkopf-related protein 3	Sun et al., 2023 (PMID: 37794186)	54219	European (U.K.)	Continuous	2025-05-06	Q9UBP4	DKK3	Cardiometabolic
OID20295	Protein delta homolog 1	Sun et al., 2023 (PMID: 37794186)	54219	European (U.K.)	Continuous	2025-05-06	P80370	DLK1	Cardiometabolic
OID20627	DnaJ homolog subfamily A member 2	Sun et al., 2023 (PMID: 37794186)	54219	European (U.K.)	Continuous	2025-05-06	O60884	DNAJA2	Inflammation
OID20093	DnaJ homolog subfamily B member 8	Sun et al., 2023 (PMID: 37794186)	54219	European (U.K.)	Continuous	2025-05-06	Q8NHS0	DNAJB8	Cardiometabolic
OID20712	Delta and Notch-like epidermal growth factor-related receptor	Sun et al., 2023 (PMID: 37794186)	54219	European (U.K.)	Continuous	2025-05-06	Q8NFT8	DNER	Inflammation
OID20744	2'-deoxynucleoside 5'-phosphate N-hydrolase 1	Sun et al., 2023 (PMID: 37794186)	54219	European (U.K.)	Continuous	2025-05-06	O43598	DNPH1	Inflammation
OID20138	Docking protein 2	Sun et al., 2023 (PMID: 37794186)	54219	European (U.K.)	Continuous	2025-05-06	O60496	DOK2	Cardiometabolic
OID20527	Inactive dipeptidyl peptidase 10	Sun et al., 2023 (PMID: 37794186)	54219	European (U.K.)	Continuous	2025-05-06	Q8N608	DPP10	Inflammation
OID20406	Dipeptidyl peptidase 4	Sun et al., 2023 (PMID: 37794186)	54219	European (U.K.)	Continuous	2025-05-06	P27487	DPP4	Cardiometabolic
OID20142	Dipeptidyl peptidase 2	Sun et al., 2023 (PMID: 37794186)	54219	European (U.K.)	Continuous	2025-05-06	Q9UHL4	DPP7	Cardiometabolic
OID20278	Dermatopontin	Sun et al., 2023 (PMID: 37794186)	54219	European (U.K.)	Continuous	2025-05-06	Q07507	DPT	Cardiometabolic
OID20059	Dual oxidase 2	Sun et al., 2023 (PMID: 37794186)	54219	European (U.K.)	Continuous	2025-05-06	Q9NRD8	DUOX2	Cardiometabolic
OID20525	Tumor necrosis factor receptor superfamily member EDAR	Sun et al., 2023 (PMID: 37794186)	54219	European (U.K.)	Continuous	2025-05-06	Q9UNE0	EDAR	Inflammation
OID20081	EGF-like repeat and discoidin I-like domain-containing protein 3	Sun et al., 2023 (PMID: 37794186)	54219	European (U.K.)	Continuous	2025-05-06	O43854	EDIL3	Cardiometabolic
OID20414	EGF-containing fibulin-like extracellular matrix protein 1	Sun et al., 2023 (PMID: 37794186)	54219	European (U.K.)	Continuous	2025-05-06	Q12805	EFEMP1	Cardiometabolic
OID20698	Pro-epidermal growth factor	Sun et al., 2023 (PMID: 37794186)	54219	European (U.K.)	Continuous	2025-05-06	P01133	EGF	Inflammation
OID20319	Epidermal growth factor receptor	Sun et al., 2023 (PMID: 37794186)	54219	European (U.K.)	Continuous	2025-05-06	P00533	EGFR	Cardiometabolic
OID20572	Egl nine homolog 1	Sun et al., 2023 (PMID: 37794186)	54219	European (U.K.)	Continuous	2025-05-06	Q9GZT9	EGLN1	Inflammation
OID20162	Eukaryotic translation initiation factor 4E-binding protein 1	Sun et al., 2023 (PMID: 37794186)	54219	European (U.K.)	Continuous	2025-05-06	Q13541	EIF4EBP1	Cardiometabolic
OID20625	Eukaryotic translation initiation factor 4 gamma 1	Sun et al., 2023 (PMID: 37794186)	54219	European (U.K.)	Continuous	2025-05-06	Q04637	EIF4G1	Inflammation
OID20423	Eukaryotic translation initiation factor 5A-1	Sun et al., 2023 (PMID: 37794186)	54219	European (U.K.)	Continuous	2025-05-06	P63241	EIF5A	Inflammation
OID20497	Protein enabled homolog	Sun et al., 2023 (PMID: 37794186)	54219	European (U.K.)	Continuous	2025-05-06	Q8N8S7	ENAH	Inflammation
OID20287	Endoglin	Sun et al., 2023 (PMID: 37794186)	54219	European (U.K.)	Continuous	2025-05-06	P17813	ENG	Cardiometabolic
OID20288	Ectonucleotide pyrophosphatase/phosphodiesterase family member 2	Sun et al., 2023 (PMID: 37794186)	54219	European (U.K.)	Continuous	2025-05-06	Q13822	ENPP2	Cardiometabolic
OID20736	Ectonucleotide pyrophosphatase/phosphodiesterase family member 5	Sun et al., 2023 (PMID: 37794186)	54219	European (U.K.)	Continuous	2025-05-06	Q9UJA9	ENPP5	Inflammation
OID20689	Ectonucleotide pyrophosphatase/phosphodiesterase family member 7	Sun et al., 2023 (PMID: 37794186)	54219	European (U.K.)	Continuous	2025-05-06	Q6UWV6	ENPP7	Inflammation
OID20104	Ectonucleoside triphosphate diphosphohydrolase 5	Sun et al., 2023 (PMID: 37794186)	54219	European (U.K.)	Continuous	2025-05-06	O75356	ENTPD5	Cardiometabolic
OID20100	Ectonucleoside triphosphate diphosphohydrolase 6	Sun et al., 2023 (PMID: 37794186)	54219	European (U.K.)	Continuous	2025-05-06	O75354	ENTPD6	Cardiometabolic
OID20743	Epithelial cell adhesion molecule	Sun et al., 2023 (PMID: 37794186)	54219	European (U.K.)	Continuous	2025-05-06	P16422	EPCAM	Inflammation
OID20677	Ephrin type-A receptor 1	Sun et al., 2023 (PMID: 37794186)	54219	European (U.K.)	Continuous	2025-05-06	P21709	EPHA1	Inflammation
OID20242	Ephrin type-B receptor 4	Sun et al., 2023 (PMID: 37794186)	54219	European (U.K.)	Continuous	2025-05-06	P54760	EPHB4	Cardiometabolic
OID20119	Bifunctional epoxide hydrolase 2 [Includes: Cytosolic epoxide hydrolase 2	Sun et al., 2023 (PMID: 37794186)	54219	European (U.K.)	Continuous	2025-05-06	P34913	EPHX2	Cardiometabolic
OID20522	Erythropoietin	Sun et al., 2023 (PMID: 37794186)	54219	European (U.K.)	Continuous	2025-05-06	P01588	EPO	Inflammation
OID20705	Receptor tyrosine-protein kinase erbB-3	Sun et al., 2023 (PMID: 37794186)	54219	European (U.K.)	Continuous	2025-05-06	P21860	ERBB3	Inflammation
OID20270	Endothelial cell-selective adhesion molecule	Sun et al., 2023 (PMID: 37794186)	54219	European (U.K.)	Continuous	2025-05-06	Q96AP7	ESAM	Cardiometabolic
OID20758	Endothelial cell-specific molecule 1	Sun et al., 2023 (PMID: 37794186)	54219	European (U.K.)	Continuous	2025-05-06	Q9NQ30	ESM1	Inflammation
OID20691	Proteinase-activated receptor 1	Sun et al., 2023 (PMID: 37794186)	54219	European (U.K.)	Continuous	2025-05-06	P25116	F2R	Inflammation
OID20372	Coagulation factor VII	Sun et al., 2023 (PMID: 37794186)	54219	European (U.K.)	Continuous	2025-05-06	P08709	F7	Cardiometabolic
OID20349	Coagulation factor IX	Sun et al., 2023 (PMID: 37794186)	54219	European (U.K.)	Continuous	2025-05-06	P00740	F9	Cardiometabolic
OID20778	Fatty acid-binding protein, liver	Sun et al., 2023 (PMID: 37794186)	54219	European (U.K.)	Continuous	2025-05-06	P07148	FABP1	Inflammation
OID20200	Fatty acid-binding protein, intestinal	Sun et al., 2023 (PMID: 37794186)	54219	European (U.K.)	Continuous	2025-05-06	P12104	FABP2	Cardiometabolic
OID20245	Fatty acid-binding protein, adipocyte	Sun et al., 2023 (PMID: 37794186)	54219	European (U.K.)	Continuous	2025-05-06	P15090	FABP4	Cardiometabolic
OID20076	Gastrotropin	Sun et al., 2023 (PMID: 37794186)	54219	European (U.K.)	Continuous	2025-05-06	P51161	FABP6	Cardiometabolic
OID20501	Fatty acid-binding protein 9	Sun et al., 2023 (PMID: 37794186)	54219	European (U.K.)	Continuous	2025-05-06	Q0Z7S8	FABP9	Inflammation
OID20151	FAS-associated death domain protein	Sun et al., 2023 (PMID: 37794186)	54219	European (U.K.)	Continuous	2025-05-06	Q13158	FADD	Cardiometabolic
OID20233	Protein FAM3C	Sun et al., 2023 (PMID: 37794186)	54219	European (U.K.)	Continuous	2025-05-06	Q92520	FAM3C	Cardiometabolic
OID20330	Prolyl endopeptidase FAP	Sun et al., 2023 (PMID: 37794186)	54219	European (U.K.)	Continuous	2025-05-06	Q12884	FAP	Cardiometabolic
OID20316	Tumor necrosis factor receptor superfamily member 6	Sun et al., 2023 (PMID: 37794186)	54219	European (U.K.)	Continuous	2025-05-06	P25445	FAS	Cardiometabolic
OID20665	Tumor necrosis factor ligand superfamily member 6	Sun et al., 2023 (PMID: 37794186)	54219	European (U.K.)	Continuous	2025-05-06	P48023	FASLG	Inflammation
OID20227	Fructose-1,6-bisphosphatase 1	Sun et al., 2023 (PMID: 37794186)	54219	European (U.K.)	Continuous	2025-05-06	P09467	FBP1	Cardiometabolic
OID20564	Immunoglobulin alpha Fc receptor	Sun et al., 2023 (PMID: 37794186)	54219	European (U.K.)	Continuous	2025-05-06	P24071	FCAR	Inflammation
OID20391	Low affinity immunoglobulin gamma Fc region receptor II-a	Sun et al., 2023 (PMID: 37794186)	54219	European (U.K.)	Continuous	2025-05-06	P12318	FCGR2A	Cardiometabolic
OID20387	Low affinity immunoglobulin gamma Fc region receptor III-B	Sun et al., 2023 (PMID: 37794186)	54219	European (U.K.)	Continuous	2025-05-06	O75015	FCGR3B	Cardiometabolic
OID20382	Ficolin-2	Sun et al., 2023 (PMID: 37794186)	54219	European (U.K.)	Continuous	2025-05-06	Q15485	FCN2	Cardiometabolic
OID20172	Fc receptor-like protein 1	Sun et al., 2023 (PMID: 37794186)	54219	European (U.K.)	Continuous	2025-05-06	Q96LA6	FCRL1	Cardiometabolic
OID20639	Fc receptor-like protein 2	Sun et al., 2023 (PMID: 37794186)	54219	European (U.K.)	Continuous	2025-05-06	Q96LA5	FCRL2	Inflammation
OID20443	Fc receptor-like protein 3	Sun et al., 2023 (PMID: 37794186)	54219	European (U.K.)	Continuous	2025-05-06	Q96P31	FCRL3	Inflammation
OID20529	Fc receptor-like protein 6	Sun et al., 2023 (PMID: 37794186)	54219	European (U.K.)	Continuous	2025-05-06	Q6DN72	FCRL6	Inflammation
OID20404	Fetuin-B	Sun et al., 2023 (PMID: 37794186)	54219	European (U.K.)	Continuous	2025-05-06	Q9UGM5	FETUB	Cardiometabolic
OID20715	Fibroblast growth factor 19	Sun et al., 2023 (PMID: 37794186)	54219	European (U.K.)	Continuous	2025-05-06	O95750	FGF19	Inflammation
OID20503	Fibroblast growth factor 2	Sun et al., 2023 (PMID: 37794186)	54219	European (U.K.)	Continuous	2025-05-06	P09038	FGF2	Inflammation
OID20490	Fibroblast growth factor 5	Sun et al., 2023 (PMID: 37794186)	54219	European (U.K.)	Continuous	2025-05-06	P12034	FGF5	Inflammation
OID20722	Mitochondrial fission 1 protein	Sun et al., 2023 (PMID: 37794186)	54219	European (U.K.)	Continuous	2025-05-06	Q9Y3D6	FIS1	Inflammation
OID20618	Peptidyl-prolyl cis-trans isomerase FKBP1B	Sun et al., 2023 (PMID: 37794186)	54219	European (U.K.)	Continuous	2025-05-06	P68106	FKBP1B	Inflammation
OID20661	Fms-related tyrosine kinase 3 ligand	Sun et al., 2023 (PMID: 37794186)	54219	European (U.K.)	Continuous	2025-05-06	P49771	FLT3LG	Inflammation
OID20515	Forkhead box protein O1	Sun et al., 2023 (PMID: 37794186)	54219	European (U.K.)	Continuous	2025-05-06	Q12778	FOXO1	Inflammation
OID20770	Follistatin	Sun et al., 2023 (PMID: 37794186)	54219	European (U.K.)	Continuous	2025-05-06	P19883	FST	Inflammation
OID20782	Follistatin-related protein 3	Sun et al., 2023 (PMID: 37794186)	54219	European (U.K.)	Continuous	2025-05-06	O95633	FSTL3	Inflammation
OID20261	Tissue alpha-L-fucosidase	Sun et al., 2023 (PMID: 37794186)	54219	European (U.K.)	Continuous	2025-05-06	P04066	FUCA1	Cardiometabolic
OID20463	FXYD domain-containing ion transport regulator 5	Sun et al., 2023 (PMID: 37794186)	54219	European (U.K.)	Continuous	2025-05-06	Q96DB9	FXYD5	Inflammation
OID20727	Galanin peptides [Cleaved into: Galanin; Galanin message-associated peptide	Sun et al., 2023 (PMID: 37794186)	54219	European (U.K.)	Continuous	2025-05-06	P22466	GAL	Inflammation
OID20471	Polypeptide N-acetylgalactosaminyltransferase 3	Sun et al., 2023 (PMID: 37794186)	54219	European (U.K.)	Continuous	2025-05-06	Q14435	GALNT3	Inflammation
OID20318	Growth arrest-specific protein 6	Sun et al., 2023 (PMID: 37794186)	54219	European (U.K.)	Continuous	2025-05-06	Q14393	GAS6	Cardiometabolic
OID20489	Guanylate-binding protein 2	Sun et al., 2023 (PMID: 37794186)	54219	European (U.K.)	Continuous	2025-05-06	P32456	GBP2	Inflammation
OID20251	Growth/differentiation factor 15	Sun et al., 2023 (PMID: 37794186)	54219	European (U.K.)	Continuous	2025-05-06	Q99988	GDF15	Cardiometabolic
OID20202	Growth/differentiation factor 2	Sun et al., 2023 (PMID: 37794186)	54219	European (U.K.)	Continuous	2025-05-06	Q9UK05	GDF2	Cardiometabolic
OID20416	Gamma-glutamyl hydrolase	Sun et al., 2023 (PMID: 37794186)	54219	European (U.K.)	Continuous	2025-05-06	Q92820	GGH	Cardiometabolic
OID20220	Somatotropin	Sun et al., 2023 (PMID: 37794186)	54219	European (U.K.)	Continuous	2025-05-06	P01241	GH1	Cardiometabolic
OID20175	Appetite-regulating hormone	Sun et al., 2023 (PMID: 37794186)	54219	European (U.K.)	Continuous	2025-05-06	Q9UBU3	GHRL	Cardiometabolic
OID20107	Lactoylglutathione lyase	Sun et al., 2023 (PMID: 37794186)	54219	European (U.K.)	Continuous	2025-05-06	Q04760	GLO1	Cardiometabolic
OID20710	Glyoxalase domain-containing protein 4	Sun et al., 2023 (PMID: 37794186)	54219	European (U.K.)	Continuous	2025-05-06	Q9HC38	GLOD4	Inflammation
OID20195	Glutaredoxin-1	Sun et al., 2023 (PMID: 37794186)	54219	European (U.K.)	Continuous	2025-05-06	P35754	GLRX	Cardiometabolic
OID20641	GMP reductase 1	Sun et al., 2023 (PMID: 37794186)	54219	European (U.K.)	Continuous	2025-05-06	P36959	GMPR	Inflammation
OID20551	Golgi-associated PDZ and coiled-coil motif-containing protein	Sun et al., 2023 (PMID: 37794186)	54219	European (U.K.)	Continuous	2025-05-06	Q9HD26	GOPC	Inflammation
OID20381	Platelet glycoprotein Ib alpha chain	Sun et al., 2023 (PMID: 37794186)	54219	European (U.K.)	Continuous	2025-05-06	P07359	GP1BA	Cardiometabolic
OID20090	Pancreatic secretory granule membrane major glycoprotein GP2	Sun et al., 2023 (PMID: 37794186)	54219	European (U.K.)	Continuous	2025-05-06	P55259	GP2	Cardiometabolic
OID20173	Transmembrane glycoprotein NMB	Sun et al., 2023 (PMID: 37794186)	54219	European (U.K.)	Continuous	2025-05-06	Q14956	GPNMB	Cardiometabolic
OID20095	Prosaposin receptor GPR37	Sun et al., 2023 (PMID: 37794186)	54219	European (U.K.)	Continuous	2025-05-06	O15354	GPR37	Cardiometabolic
OID20192	GRB2-related adapter protein 2	Sun et al., 2023 (PMID: 37794186)	54219	European (U.K.)	Continuous	2025-05-06	O75791	GRAP2	Cardiometabolic
OID20066	G protein-coupled receptor kinase 5	Sun et al., 2023 (PMID: 37794186)	54219	European (U.K.)	Continuous	2025-05-06	P34947	GRK5	Cardiometabolic
OID20166	Glutathione S-transferase A1	Sun et al., 2023 (PMID: 37794186)	54219	European (U.K.)	Continuous	2025-05-06	P08263	GSTA1	Cardiometabolic
OID20296	Beta-glucuronidase	Sun et al., 2023 (PMID: 37794186)	54219	European (U.K.)	Continuous	2025-05-06	P08236	GUSB	Cardiometabolic
OID20097	Glycogen [starch] synthase, muscle	Sun et al., 2023 (PMID: 37794186)	54219	European (U.K.)	Continuous	2025-05-06	P13807	GYS1	Cardiometabolic
OID20663	Granzyme A	Sun et al., 2023 (PMID: 37794186)	54219	European (U.K.)	Continuous	2025-05-06	P12544	GZMA	Inflammation
OID20604	Granzyme B	Sun et al., 2023 (PMID: 37794186)	54219	European (U.K.)	Continuous	2025-05-06	P10144	GZMB	Inflammation
OID20096	Granzyme H	Sun et al., 2023 (PMID: 37794186)	54219	European (U.K.)	Continuous	2025-05-06	P20718	GZMH	Cardiometabolic
OID20648	Hematopoietic lineage cell-specific protein	Sun et al., 2023 (PMID: 37794186)	54219	European (U.K.)	Continuous	2025-05-06	P14317	HCLS1	Inflammation
OID20063	Heme-binding protein 1	Sun et al., 2023 (PMID: 37794186)	54219	European (U.K.)	Continuous	2025-05-06	Q9NRV9	HEBP1	Cardiometabolic
OID20589	Protein HEXIM1	Sun et al., 2023 (PMID: 37794186)	54219	European (U.K.)	Continuous	2025-05-06	O94992	HEXIM1	Inflammation
OID20656	Hepatocyte growth factor	Sun et al., 2023 (PMID: 37794186)	54219	European (U.K.)	Continuous	2025-05-06	P14210	HGF	Inflammation
OID20065	Hexokinase-2	Sun et al., 2023 (PMID: 37794186)	54219	European (U.K.)	Continuous	2025-05-06	P52789	HK2	Cardiometabolic
OID20520	HLA class II histocompatibility antigen, DR alpha chain	Sun et al., 2023 (PMID: 37794186)	54219	European (U.K.)	Continuous	2025-05-06	P01903	HLA-DRA	Inflammation
OID20532	HLA class I histocompatibility antigen, alpha chain E	Sun et al., 2023 (PMID: 37794186)	54219	European (U.K.)	Continuous	2025-05-06	P13747	HLA-E	Inflammation
OID20217	Heme oxygenase 1	Sun et al., 2023 (PMID: 37794186)	54219	European (U.K.)	Continuous	2025-05-06	P09601	HMOX1	Cardiometabolic
OID20051	Heterogeneous nuclear ribonucleoprotein K	Sun et al., 2023 (PMID: 37794186)	54219	European (U.K.)	Continuous	2025-05-06	P61978	HNRNPK	Cardiometabolic
OID20615	Hippocalcin-like protein 1	Sun et al., 2023 (PMID: 37794186)	54219	European (U.K.)	Continuous	2025-05-06	P37235	HPCAL1	Inflammation
OID20575	Corticosteroid 11-beta-dehydrogenase isozyme 1	Sun et al., 2023 (PMID: 37794186)	54219	European (U.K.)	Continuous	2025-05-06	P28845	HSD11B1	Inflammation
OID20718	Heat shock 70 kDa protein 1A	Sun et al., 2023 (PMID: 37794186)	54219	European (U.K.)	Continuous	2025-05-06	P0DMV8	HSPA1A	Inflammation
OID20230	Heat shock protein beta-1	Sun et al., 2023 (PMID: 37794186)	54219	European (U.K.)	Continuous	2025-05-06	P04792	HSPB1	Cardiometabolic
OID20383	Basement membrane-specific heparan sulfate proteoglycan core protein	Sun et al., 2023 (PMID: 37794186)	54219	European (U.K.)	Continuous	2025-05-06	P98160	HSPG2	Cardiometabolic
OID20357	Hyaluronidase-1	Sun et al., 2023 (PMID: 37794186)	54219	European (U.K.)	Continuous	2025-05-06	Q12794	HYAL1	Cardiometabolic
OID20300	Hypoxia up-regulated protein 1	Sun et al., 2023 (PMID: 37794186)	54219	European (U.K.)	Continuous	2025-05-06	Q9Y4L1	HYOU1	Cardiometabolic
OID20484	Islet cell autoantigen 1	Sun et al., 2023 (PMID: 37794186)	54219	European (U.K.)	Continuous	2025-05-06	Q05084	ICA1	Inflammation
OID20411	Intercellular adhesion molecule 1	Sun et al., 2023 (PMID: 37794186)	54219	European (U.K.)	Continuous	2025-05-06	P05362	ICAM1	Cardiometabolic
OID20248	Intercellular adhesion molecule 2	Sun et al., 2023 (PMID: 37794186)	54219	European (U.K.)	Continuous	2025-05-06	P13598	ICAM2	Cardiometabolic
OID20277	Intercellular adhesion molecule 3	Sun et al., 2023 (PMID: 37794186)	54219	European (U.K.)	Continuous	2025-05-06	P32942	ICAM3	Cardiometabolic
OID20578	Intercellular adhesion molecule 4	Sun et al., 2023 (PMID: 37794186)	54219	European (U.K.)	Continuous	2025-05-06	Q14773	ICAM4	Inflammation
OID20145	Intercellular adhesion molecule 5	Sun et al., 2023 (PMID: 37794186)	54219	European (U.K.)	Continuous	2025-05-06	Q9UMF0	ICAM5	Cardiometabolic
OID20619	Iduronate 2-sulfatase	Sun et al., 2023 (PMID: 37794186)	54219	European (U.K.)	Continuous	2025-05-06	P22304	IDS	Inflammation
OID20495	Interferon gamma	Sun et al., 2023 (PMID: 37794186)	54219	European (U.K.)	Continuous	2025-05-06	P01579	IFNG	Inflammation
OID20678	Interferon gamma receptor 1	Sun et al., 2023 (PMID: 37794186)	54219	European (U.K.)	Continuous	2025-05-06	P15260	IFNGR1	Inflammation
OID20506	Interferon lambda receptor 1	Sun et al., 2023 (PMID: 37794186)	54219	European (U.K.)	Continuous	2025-05-06	Q8IU57	IFNLR1	Inflammation
OID20246	Insulin-like growth factor-binding protein 1	Sun et al., 2023 (PMID: 37794186)	54219	European (U.K.)	Continuous	2025-05-06	P08833	IGFBP1	Cardiometabolic
OID20325	Insulin-like growth factor-binding protein 2	Sun et al., 2023 (PMID: 37794186)	54219	European (U.K.)	Continuous	2025-05-06	P18065	IGFBP2	Cardiometabolic
OID20398	Insulin-like growth factor-binding protein 3	Sun et al., 2023 (PMID: 37794186)	54219	European (U.K.)	Continuous	2025-05-06	P17936	IGFBP3	Cardiometabolic
OID20413	Insulin-like growth factor-binding protein 6	Sun et al., 2023 (PMID: 37794186)	54219	European (U.K.)	Continuous	2025-05-06	P24592	IGFBP6	Cardiometabolic
OID20236	Insulin-like growth factor-binding protein 7	Sun et al., 2023 (PMID: 37794186)	54219	European (U.K.)	Continuous	2025-05-06	Q16270	IGFBP7	Cardiometabolic
OID20155	Insulin-like growth factor-binding protein-like 1	Sun et al., 2023 (PMID: 37794186)	54219	European (U.K.)	Continuous	2025-05-06	Q8WX77	IGFBPL1	Cardiometabolic
OID20167	Immunoglobulin superfamily member 8	Sun et al., 2023 (PMID: 37794186)	54219	European (U.K.)	Continuous	2025-05-06	Q969P0	IGSF8	Cardiometabolic
OID20544	NF-kappa-B essential modulator	Sun et al., 2023 (PMID: 37794186)	54219	European (U.K.)	Continuous	2025-05-06	Q9Y6K9	IKBKG	Inflammation
OID20431	Interleukin-10	Sun et al., 2023 (PMID: 37794186)	54219	European (U.K.)	Continuous	2025-05-06	P22301	IL10	Inflammation
OID20420	Interleukin-10 receptor subunit alpha	Sun et al., 2023 (PMID: 37794186)	54219	European (U.K.)	Continuous	2025-05-06	Q13651	IL10RA	Inflammation
OID20696	Interleukin-10 receptor subunit beta	Sun et al., 2023 (PMID: 37794186)	54219	European (U.K.)	Continuous	2025-05-06	Q08334	IL10RB	Inflammation
OID20455	Interleukin-11	Sun et al., 2023 (PMID: 37794186)	54219	European (U.K.)	Continuous	2025-05-06	P20809	IL11	Inflammation
OID20666	Interleukin-12 subunit beta	Sun et al., 2023 (PMID: 37794186)	54219	European (U.K.)	Continuous	2025-05-06	P29460	IL12B	Inflammation
OID20486	Interleukin-12 receptor subunit beta-1	Sun et al., 2023 (PMID: 37794186)	54219	European (U.K.)	Continuous	2025-05-06	P42701	IL12RB1	Inflammation
OID20430	Interleukin-13	Sun et al., 2023 (PMID: 37794186)	54219	European (U.K.)	Continuous	2025-05-06	P35225	IL13	Inflammation
OID20562	Interleukin-15	Sun et al., 2023 (PMID: 37794186)	54219	European (U.K.)	Continuous	2025-05-06	P40933	IL15	Inflammation
OID20498	Interleukin-15 receptor subunit alpha	Sun et al., 2023 (PMID: 37794186)	54219	European (U.K.)	Continuous	2025-05-06	Q13261	IL15RA	Inflammation
OID20633	Pro-interleukin-16 [Cleaved into: Interleukin-16	Sun et al., 2023 (PMID: 37794186)	54219	European (U.K.)	Continuous	2025-05-06	Q14005	IL16	Inflammation
OID20469	Interleukin-17A	Sun et al., 2023 (PMID: 37794186)	54219	European (U.K.)	Continuous	2025-05-06	Q16552	IL17A	Inflammation
OID20477	Interleukin-17C	Sun et al., 2023 (PMID: 37794186)	54219	European (U.K.)	Continuous	2025-05-06	Q9P0M4	IL17C	Inflammation
OID20481	Interleukin-17D	Sun et al., 2023 (PMID: 37794186)	54219	European (U.K.)	Continuous	2025-05-06	Q8TAD2	IL17D	Inflammation
OID20456	Interleukin-17F	Sun et al., 2023 (PMID: 37794186)	54219	European (U.K.)	Continuous	2025-05-06	Q96PD4	IL17F	Inflammation
OID20585	Interleukin-17 receptor B	Sun et al., 2023 (PMID: 37794186)	54219	European (U.K.)	Continuous	2025-05-06	Q9NRM6	IL17RB	Inflammation
OID20694	Interleukin-18	Sun et al., 2023 (PMID: 37794186)	54219	European (U.K.)	Continuous	2025-05-06	Q14116	IL18	Inflammation
OID20348	Interleukin-18-binding protein	Sun et al., 2023 (PMID: 37794186)	54219	European (U.K.)	Continuous	2025-05-06	O95998	IL18BP	Cardiometabolic
OID20652	Interleukin-18 receptor 1	Sun et al., 2023 (PMID: 37794186)	54219	European (U.K.)	Continuous	2025-05-06	Q13478	IL18R1	Inflammation
OID20158	Interleukin-19	Sun et al., 2023 (PMID: 37794186)	54219	European (U.K.)	Continuous	2025-05-06	Q9UHD0	IL19	Cardiometabolic
OID20488	Interleukin-1 alpha	Sun et al., 2023 (PMID: 37794186)	54219	European (U.K.)	Continuous	2025-05-06	P01583	IL1A	Inflammation
OID20427	Interleukin-1 beta	Sun et al., 2023 (PMID: 37794186)	54219	European (U.K.)	Continuous	2025-05-06	P01584	IL1B	Inflammation
OID20757	Interleukin-1 receptor type 2	Sun et al., 2023 (PMID: 37794186)	54219	European (U.K.)	Continuous	2025-05-06	P27930	IL1R2	Inflammation
OID20250	Interleukin-1 receptor-like 1	Sun et al., 2023 (PMID: 37794186)	54219	European (U.K.)	Continuous	2025-05-06	Q01638	IL1RL1	Cardiometabolic
OID20487	Interleukin-1 receptor-like 2	Sun et al., 2023 (PMID: 37794186)	54219	European (U.K.)	Continuous	2025-05-06	Q9HB29	IL1RL2	Inflammation
OID20700	Interleukin-1 receptor antagonist protein	Sun et al., 2023 (PMID: 37794186)	54219	European (U.K.)	Continuous	2025-05-06	P18510	IL1RN	Inflammation
OID20419	Interleukin-2	Sun et al., 2023 (PMID: 37794186)	54219	European (U.K.)	Continuous	2025-05-06	P60568	IL2	Inflammation
OID20453	Interleukin-20	Sun et al., 2023 (PMID: 37794186)	54219	European (U.K.)	Continuous	2025-05-06	Q9NYY1	IL20	Inflammation
OID20422	Interleukin-20 receptor subunit alpha	Sun et al., 2023 (PMID: 37794186)	54219	European (U.K.)	Continuous	2025-05-06	Q9UHF4	IL20RA	Inflammation
OID20449	Interleukin-22 receptor subunit alpha-1	Sun et al., 2023 (PMID: 37794186)	54219	European (U.K.)	Continuous	2025-05-06	Q8N6P7	IL22RA1	Inflammation
OID20440	Interleukin-24	Sun et al., 2023 (PMID: 37794186)	54219	European (U.K.)	Continuous	2025-05-06	Q13007	IL24	Inflammation
OID20267	Interleukin-2 receptor subunit alpha	Sun et al., 2023 (PMID: 37794186)	54219	European (U.K.)	Continuous	2025-05-06	P01589	IL2RA	Cardiometabolic
OID20450	Interleukin-2 receptor subunit beta	Sun et al., 2023 (PMID: 37794186)	54219	European (U.K.)	Continuous	2025-05-06	P14784	IL2RB	Inflammation
OID20605	Interleukin-32	Sun et al., 2023 (PMID: 37794186)	54219	European (U.K.)	Continuous	2025-05-06	P24001	IL32	Inflammation
OID20428	Interleukin-33	Sun et al., 2023 (PMID: 37794186)	54219	European (U.K.)	Continuous	2025-05-06	O95760	IL33	Inflammation
OID20461	Interleukin-3 receptor subunit alpha	Sun et al., 2023 (PMID: 37794186)	54219	European (U.K.)	Continuous	2025-05-06	P26951	IL3RA	Inflammation
OID20426	Interleukin-4	Sun et al., 2023 (PMID: 37794186)	54219	European (U.K.)	Continuous	2025-05-06	P05112	IL4	Inflammation
OID20576	Interleukin-4 receptor subunit alpha	Sun et al., 2023 (PMID: 37794186)	54219	European (U.K.)	Continuous	2025-05-06	P24394	IL4R	Inflammation
OID20472	Interleukin-5	Sun et al., 2023 (PMID: 37794186)	54219	European (U.K.)	Continuous	2025-05-06	P05113	IL5	Inflammation
OID20601	Interleukin-5 receptor subunit alpha	Sun et al., 2023 (PMID: 37794186)	54219	European (U.K.)	Continuous	2025-05-06	Q01344	IL5RA	Inflammation
OID20101	Interleukin-6	Sun et al., 2023 (PMID: 37794186)	54219	European (U.K.)	Continuous	2025-05-06	P05231	IL6	Cardiometabolic
OID20563	Interleukin-6	Sun et al., 2023 (PMID: 37794186)	54219	European (U.K.)	Continuous	2025-05-06	P05231	IL6	Inflammation
OID20385	Interleukin-6 receptor subunit alpha	Sun et al., 2023 (PMID: 37794186)	54219	European (U.K.)	Continuous	2025-05-06	P08887	IL6R	Cardiometabolic
OID20147	Interleukin-6 receptor subunit beta	Sun et al., 2023 (PMID: 37794186)	54219	European (U.K.)	Continuous	2025-05-06	P40189	IL6ST	Cardiometabolic
OID20535	Interleukin-7	Sun et al., 2023 (PMID: 37794186)	54219	European (U.K.)	Continuous	2025-05-06	P13232	IL7	Inflammation
OID20085	Lymphoid-restricted membrane protein	Sun et al., 2023 (PMID: 37794186)	54219	European (U.K.)	Continuous	2025-05-06	Q12912	IRAG2	Cardiometabolic
OID20485	Interleukin-1 receptor-associated kinase 1	Sun et al., 2023 (PMID: 37794186)	54219	European (U.K.)	Continuous	2025-05-06	P51617	IRAK1	Inflammation
OID20577	Interleukin-1 receptor-associated kinase 4	Sun et al., 2023 (PMID: 37794186)	54219	European (U.K.)	Continuous	2025-05-06	Q9NWZ3	IRAK4	Inflammation
OID20538	Isthmin-1	Sun et al., 2023 (PMID: 37794186)	54219	European (U.K.)	Continuous	2025-05-06	B1AKI9	ISM1	Inflammation
OID20581	Integrin alpha-11	Sun et al., 2023 (PMID: 37794186)	54219	European (U.K.)	Continuous	2025-05-06	Q9UKX5	ITGA11	Inflammation
OID20528	Integrin alpha-6	Sun et al., 2023 (PMID: 37794186)	54219	European (U.K.)	Continuous	2025-05-06	P23229	ITGA6	Inflammation
OID20376	Integrin beta-1	Sun et al., 2023 (PMID: 37794186)	54219	European (U.K.)	Continuous	2025-05-06	P05556	ITGB1	Cardiometabolic
OID20112	Integrin beta-1-binding protein 2	Sun et al., 2023 (PMID: 37794186)	54219	European (U.K.)	Continuous	2025-05-06	Q9UKP3	ITGB1BP2	Cardiometabolic
OID20315	Integrin beta-2	Sun et al., 2023 (PMID: 37794186)	54219	European (U.K.)	Continuous	2025-05-06	P05107	ITGB2	Cardiometabolic
OID20493	Integrin beta-6	Sun et al., 2023 (PMID: 37794186)	54219	European (U.K.)	Continuous	2025-05-06	P18564	ITGB6	Inflammation
OID20352	Inter-alpha-trypsin inhibitor heavy chain H3	Sun et al., 2023 (PMID: 37794186)	54219	European (U.K.)	Continuous	2025-05-06	Q06033	ITIH3	Cardiometabolic
OID20504	Integral membrane protein 2A	Sun et al., 2023 (PMID: 37794186)	54219	European (U.K.)	Continuous	2025-05-06	O43736	ITM2A	Inflammation
OID20494	Immunoglobulin J chain	Sun et al., 2023 (PMID: 37794186)	54219	European (U.K.)	Continuous	2025-05-06	P01591	JCHAIN	Inflammation
OID20424	Transcription factor AP-1	Sun et al., 2023 (PMID: 37794186)	54219	European (U.K.)	Continuous	2025-05-06	P05412	JUN	Inflammation
OID20370	Mast/stem cell growth factor receptor Kit	Sun et al., 2023 (PMID: 37794186)	54219	European (U.K.)	Continuous	2025-05-06	P10721	KIT	Cardiometabolic
OID20196	Kit ligand	Sun et al., 2023 (PMID: 37794186)	54219	European (U.K.)	Continuous	2025-05-06	P21583	KITLG	Cardiometabolic
OID20629	Killer cell lectin-like receptor subfamily B member 1	Sun et al., 2023 (PMID: 37794186)	54219	European (U.K.)	Continuous	2025-05-06	Q12918	KLRB1	Inflammation
OID20632	Natural killer cells antigen CD94	Sun et al., 2023 (PMID: 37794186)	54219	European (U.K.)	Continuous	2025-05-06	Q13241	KLRD1	Inflammation
OID20596	Keratin, type I cytoskeletal 19	Sun et al., 2023 (PMID: 37794186)	54219	European (U.K.)	Continuous	2025-05-06	P08727	KRT19	Inflammation
OID20232	Kynurenine--oxoglutarate transaminase 1	Sun et al., 2023 (PMID: 37794186)	54219	European (U.K.)	Continuous	2025-05-06	Q16773	KYAT1	Cardiometabolic
OID20669	Kynureninase	Sun et al., 2023 (PMID: 37794186)	54219	European (U.K.)	Continuous	2025-05-06	Q16719	KYNU	Inflammation
OID20150	Endoribonuclease LACTB2	Sun et al., 2023 (PMID: 37794186)	54219	European (U.K.)	Continuous	2025-05-06	Q53H82	LACTB2	Cardiometabolic
OID20737	Leukocyte-associated immunoglobulin-like receptor 1	Sun et al., 2023 (PMID: 37794186)	54219	European (U.K.)	Continuous	2025-05-06	Q6GTX8	LAIR1	Inflammation
OID20769	Laminin subunit alpha-4	Sun et al., 2023 (PMID: 37794186)	54219	European (U.K.)	Continuous	2025-05-06	Q16363	LAMA4	Inflammation
OID20638	Lysosome-associated membrane glycoprotein 3	Sun et al., 2023 (PMID: 37794186)	54219	European (U.K.)	Continuous	2025-05-06	Q9UQV4	LAMP3	Inflammation
OID20436	Cytosol aminopeptidase	Sun et al., 2023 (PMID: 37794186)	54219	European (U.K.)	Continuous	2025-05-06	P28838	LAP3	Inflammation
OID20640	Linker for activation of T-cells family member 1	Sun et al., 2023 (PMID: 37794186)	54219	European (U.K.)	Continuous	2025-05-06	O43561	LAT	Inflammation
OID20355	Lipopolysaccharide-binding protein	Sun et al., 2023 (PMID: 37794186)	54219	European (U.K.)	Continuous	2025-05-06	P18428	LBP	Cardiometabolic
OID20392	Neutrophil gelatinase-associated lipocalin	Sun et al., 2023 (PMID: 37794186)	54219	European (U.K.)	Continuous	2025-05-06	P80188	LCN2	Cardiometabolic
OID20240	Low-density lipoprotein receptor	Sun et al., 2023 (PMID: 37794186)	54219	European (U.K.)	Continuous	2025-05-06	P01130	LDLR	Cardiometabolic
OID20187	Leptin	Sun et al., 2023 (PMID: 37794186)	54219	European (U.K.)	Continuous	2025-05-06	P41159	LEP	Cardiometabolic
OID20128	Leptin receptor	Sun et al., 2023 (PMID: 37794186)	54219	European (U.K.)	Continuous	2025-05-06	P48357	LEPR	Cardiometabolic
OID20154	Galectin-1	Sun et al., 2023 (PMID: 37794186)	54219	European (U.K.)	Continuous	2025-05-06	P09382	LGALS1	Cardiometabolic
OID20284	Galectin-3	Sun et al., 2023 (PMID: 37794186)	54219	European (U.K.)	Continuous	2025-05-06	P17931	LGALS3	Cardiometabolic
OID20748	Galectin-4	Sun et al., 2023 (PMID: 37794186)	54219	European (U.K.)	Continuous	2025-05-06	P56470	LGALS4	Inflammation
OID20781	Galectin-9	Sun et al., 2023 (PMID: 37794186)	54219	European (U.K.)	Continuous	2025-05-06	O00182	LGALS9	Inflammation
OID20773	Legumain	Sun et al., 2023 (PMID: 37794186)	54219	European (U.K.)	Continuous	2025-05-06	Q99538	LGMN	Inflammation
OID20749	Phospholysine phosphohistidine inorganic pyrophosphate phosphatase	Sun et al., 2023 (PMID: 37794186)	54219	European (U.K.)	Continuous	2025-05-06	Q9H008	LHPP	Inflammation
OID20606	Leukemia inhibitory factor receptor	Sun et al., 2023 (PMID: 37794186)	54219	European (U.K.)	Continuous	2025-05-06	P42702	LIFR	Inflammation
OID20209	Leukocyte immunoglobulin-like receptor subfamily A member 5	Sun et al., 2023 (PMID: 37794186)	54219	European (U.K.)	Continuous	2025-05-06	A6NI73	LILRA5	Cardiometabolic
OID20323	Leukocyte immunoglobulin-like receptor subfamily B member 1	Sun et al., 2023 (PMID: 37794186)	54219	European (U.K.)	Continuous	2025-05-06	Q8NHL6	LILRB1	Cardiometabolic
OID20301	Leukocyte immunoglobulin-like receptor subfamily B member 2	Sun et al., 2023 (PMID: 37794186)	54219	European (U.K.)	Continuous	2025-05-06	Q8N423	LILRB2	Cardiometabolic
OID20429	Leukocyte immunoglobulin-like receptor subfamily B member 4	Sun et al., 2023 (PMID: 37794186)	54219	European (U.K.)	Continuous	2025-05-06	Q8NHJ6	LILRB4	Inflammation
OID20324	Leukocyte immunoglobulin-like receptor subfamily B member 5	Sun et al., 2023 (PMID: 37794186)	54219	European (U.K.)	Continuous	2025-05-06	O75023	LILRB5	Cardiometabolic
OID20188	Lipoprotein lipase	Sun et al., 2023 (PMID: 37794186)	54219	European (U.K.)	Continuous	2025-05-06	P06858	LPL	Cardiometabolic
OID20185	Low-density lipoprotein receptor-related protein 11	Sun et al., 2023 (PMID: 37794186)	54219	European (U.K.)	Continuous	2025-05-06	Q86VZ4	LRP11	Cardiometabolic
OID20438	Leucine-rich repeat neuronal protein 1	Sun et al., 2023 (PMID: 37794186)	54219	European (U.K.)	Continuous	2025-05-06	Q6UXK5	LRRN1	Inflammation
OID20530	Lymphocyte-specific protein 1	Sun et al., 2023 (PMID: 37794186)	54219	European (U.K.)	Continuous	2025-05-06	P33241	LSP1	Inflammation
OID20586	Lymphotoxin-alpha	Sun et al., 2023 (PMID: 37794186)	54219	European (U.K.)	Continuous	2025-05-06	P01374	LTA	Inflammation
OID20254	Latent-transforming growth factor beta-binding protein 2	Sun et al., 2023 (PMID: 37794186)	54219	European (U.K.)	Continuous	2025-05-06	Q14767	LTBP2	Cardiometabolic
OID20768	Tumor necrosis factor receptor superfamily member 3	Sun et al., 2023 (PMID: 37794186)	54219	European (U.K.)	Continuous	2025-05-06	P36941	LTBR	Inflammation
OID20434	Protein LTO1 homolog	Sun et al., 2023 (PMID: 37794186)	54219	European (U.K.)	Continuous	2025-05-06	Q8WV07	LTO1	Inflammation
OID20708	Lymphocyte antigen 6D	Sun et al., 2023 (PMID: 37794186)	54219	European (U.K.)	Continuous	2025-05-06	Q14210	LY6D	Inflammation
OID20580	Lymphocyte antigen 75	Sun et al., 2023 (PMID: 37794186)	54219	European (U.K.)	Continuous	2025-05-06	O60449	LY75	Inflammation
OID20670	T-lymphocyte surface antigen Ly-9	Sun et al., 2023 (PMID: 37794186)	54219	European (U.K.)	Continuous	2025-05-06	Q9HBG7	LY9	Inflammation
OID20707	Mesencephalic astrocyte-derived neurotrophic factor	Sun et al., 2023 (PMID: 37794186)	54219	European (U.K.)	Continuous	2025-05-06	P55145	MANF	Inflammation
OID20552	Dual specificity mitogen-activated protein kinase kinase 6	Sun et al., 2023 (PMID: 37794186)	54219	European (U.K.)	Continuous	2025-05-06	P52564	MAP2K6	Inflammation
OID20557	Mitogen-activated protein kinase 9	Sun et al., 2023 (PMID: 37794186)	54219	European (U.K.)	Continuous	2025-05-06	P45984	MAPK9	Inflammation
OID20210	Macrophage receptor MARCO	Sun et al., 2023 (PMID: 37794186)	54219	European (U.K.)	Continuous	2025-05-06	Q9UEW3	MARCO	Cardiometabolic
OID20767	Matrilin-2	Sun et al., 2023 (PMID: 37794186)	54219	European (U.K.)	Continuous	2025-05-06	O00339	MATN2	Inflammation
OID20263	Myoglobin	Sun et al., 2023 (PMID: 37794186)	54219	European (U.K.)	Continuous	2025-05-06	P02144	MB	Cardiometabolic
OID20343	Cell surface glycoprotein MUC18	Sun et al., 2023 (PMID: 37794186)	54219	European (U.K.)	Continuous	2025-05-06	P43121	MCAM	Cardiometabolic
OID20171	Multiple coagulation factor deficiency protein 2	Sun et al., 2023 (PMID: 37794186)	54219	European (U.K.)	Continuous	2025-05-06	Q8NI22	MCFD2	Cardiometabolic
OID20746	Multiple epidermal growth factor-like domains protein 10	Sun et al., 2023 (PMID: 37794186)	54219	European (U.K.)	Continuous	2025-05-06	Q96KG7	MEGF10	Inflammation
OID20285	Multiple epidermal growth factor-like domains protein 9	Sun et al., 2023 (PMID: 37794186)	54219	European (U.K.)	Continuous	2025-05-06	Q9H1U4	MEGF9	Cardiometabolic
OID20168	Meprin A subunit beta	Sun et al., 2023 (PMID: 37794186)	54219	European (U.K.)	Continuous	2025-05-06	Q16820	MEP1B	Cardiometabolic
OID20753	Matrix extracellular phosphoglycoprotein	Sun et al., 2023 (PMID: 37794186)	54219	European (U.K.)	Continuous	2025-05-06	Q9NQ76	MEPE	Inflammation
OID20657	Tyrosine-protein kinase Mer	Sun et al., 2023 (PMID: 37794186)	54219	European (U.K.)	Continuous	2025-05-06	Q12866	MERTK	Inflammation
OID20269	Hepatocyte growth factor receptor	Sun et al., 2023 (PMID: 37794186)	54219	European (U.K.)	Continuous	2025-05-06	P08581	MET	Cardiometabolic
OID20519	Methionine aminopeptidase 1D, mitochondrial	Sun et al., 2023 (PMID: 37794186)	54219	European (U.K.)	Continuous	2025-05-06	Q6UB28	METAP1D	Inflammation
OID20057	Microfibril-associated glycoprotein 3	Sun et al., 2023 (PMID: 37794186)	54219	European (U.K.)	Continuous	2025-05-06	P55082	MFAP3	Cardiometabolic
OID20239	Microfibrillar-associated protein 5	Sun et al., 2023 (PMID: 37794186)	54219	European (U.K.)	Continuous	2025-05-06	Q13361	MFAP5	Cardiometabolic
OID20711	Monoglyceride lipase	Sun et al., 2023 (PMID: 37794186)	54219	European (U.K.)	Continuous	2025-05-06	Q99685	MGLL	Inflammation
OID20588	Methylated-DNA--protein-cysteine methyltransferase	Sun et al., 2023 (PMID: 37794186)	54219	European (U.K.)	Continuous	2025-05-06	P16455	MGMT	Inflammation
OID20593	MHC class I polypeptide-related sequence B_A	Sun et al., 2023 (PMID: 37794186)	54219	European (U.K.)	Continuous	2025-05-06	Q29980_Q29983	MICB_MICA	Inflammation
OID20482	Allergin-1	Sun et al., 2023 (PMID: 37794186)	54219	European (U.K.)	Continuous	2025-05-06	Q7Z6M3	MILR1	Inflammation
OID20541	Promotilin [Cleaved into: Motilin; Motilin-associated peptide	Sun et al., 2023 (PMID: 37794186)	54219	European (U.K.)	Continuous	2025-05-06	P12872	MLN	Inflammation
OID20672	Interstitial collagenase	Sun et al., 2023 (PMID: 37794186)	54219	European (U.K.)	Continuous	2025-05-06	P03956	MMP1	Inflammation
OID20687	Stromelysin-2	Sun et al., 2023 (PMID: 37794186)	54219	European (U.K.)	Continuous	2025-05-06	P09238	MMP10	Inflammation
OID20087	Matrilysin	Sun et al., 2023 (PMID: 37794186)	54219	European (U.K.)	Continuous	2025-05-06	P09237	MMP7	Cardiometabolic
OID20156	Myeloid cell nuclear differentiation antigen	Sun et al., 2023 (PMID: 37794186)	54219	European (U.K.)	Continuous	2025-05-06	P41218	MNDA	Cardiometabolic
OID20092	M-phase phosphoprotein 8	Sun et al., 2023 (PMID: 37794186)	54219	European (U.K.)	Continuous	2025-05-06	Q99549	MPHOSPH8	Cardiometabolic
OID20779	Megakaryocyte and platelet inhibitory receptor G6b	Sun et al., 2023 (PMID: 37794186)	54219	European (U.K.)	Continuous	2025-05-06	O95866	MPIG6B	Inflammation
OID20275	Beta-microseminoprotein	Sun et al., 2023 (PMID: 37794186)	54219	European (U.K.)	Continuous	2025-05-06	P08118	MSMB	Cardiometabolic
OID20115	Growth/differentiation factor 8	Sun et al., 2023 (PMID: 37794186)	54219	European (U.K.)	Continuous	2025-05-06	O14793	MSTN	Cardiometabolic
OID20080	Myotrophin	Sun et al., 2023 (PMID: 37794186)	54219	European (U.K.)	Continuous	2025-05-06	P58546	MTPN	Cardiometabolic
OID20459	Mevalonate kinase	Sun et al., 2023 (PMID: 37794186)	54219	European (U.K.)	Continuous	2025-05-06	Q03426	MVK	Inflammation
OID20451	Unconventional myosin-IXb	Sun et al., 2023 (PMID: 37794186)	54219	European (U.K.)	Continuous	2025-05-06	Q13459	MYO9B	Inflammation
OID20732	Marginal zone B- and B1-cell-specific protein	Sun et al., 2023 (PMID: 37794186)	54219	European (U.K.)	Continuous	2025-05-06	Q8WU39	MZB1	Inflammation
OID20178	NAD kinase	Sun et al., 2023 (PMID: 37794186)	54219	European (U.K.)	Continuous	2025-05-06	O95544	NADK	Cardiometabolic
OID20442	Nibrin	Sun et al., 2023 (PMID: 37794186)	54219	European (U.K.)	Continuous	2025-05-06	O60934	NBN	Inflammation
OID20354	Neural cell adhesion molecule 1	Sun et al., 2023 (PMID: 37794186)	54219	European (U.K.)	Continuous	2025-05-06	P13591	NCAM1	Cardiometabolic
OID20567	Neutrophil cytosol factor 2	Sun et al., 2023 (PMID: 37794186)	54219	European (U.K.)	Continuous	2025-05-06	P19878	NCF2	Inflammation
OID20683	Cytoplasmic protein NCK2	Sun et al., 2023 (PMID: 37794186)	54219	European (U.K.)	Continuous	2025-05-06	O43639	NCK2	Inflammation
OID20448	Nicalin	Sun et al., 2023 (PMID: 37794186)	54219	European (U.K.)	Continuous	2025-05-06	Q969V3	NCLN	Inflammation
OID20566	Natural cytotoxicity triggering receptor 1	Sun et al., 2023 (PMID: 37794186)	54219	European (U.K.)	Continuous	2025-05-06	O76036	NCR1	Inflammation
OID20222	Nectin-2	Sun et al., 2023 (PMID: 37794186)	54219	European (U.K.)	Continuous	2025-05-06	Q92692	NECTIN2	Cardiometabolic
OID20706	Protein kinase C-binding protein NELL2	Sun et al., 2023 (PMID: 37794186)	54219	European (U.K.)	Continuous	2025-05-06	Q99435	NELL2	Inflammation
OID20634	Neurofascin	Sun et al., 2023 (PMID: 37794186)	54219	European (U.K.)	Continuous	2025-05-06	O94856	NFASC	Inflammation
OID20545	Nuclear factor of activated T-cells, cytoplasmic 1	Sun et al., 2023 (PMID: 37794186)	54219	European (U.K.)	Continuous	2025-05-06	O95644	NFATC1	Inflammation
OID20470	Nuclear factor of activated T-cells, cytoplasmic 3	Sun et al., 2023 (PMID: 37794186)	54219	European (U.K.)	Continuous	2025-05-06	Q12968	NFATC3	Inflammation
OID20362	Nidogen-1	Sun et al., 2023 (PMID: 37794186)	54219	European (U.K.)	Continuous	2025-05-06	P14543	NID1	Cardiometabolic
OID20789	Nucleoside diphosphate kinase 3	Sun et al., 2023 (PMID: 37794186)	54219	European (U.K.)	Continuous	2025-05-06	Q13232	NME3	Inflammation
OID20311	Neurogenic locus notch homolog protein 1	Sun et al., 2023 (PMID: 37794186)	54219	European (U.K.)	Continuous	2025-05-06	P46531	NOTCH1	Cardiometabolic
OID20253	Neurogenic locus notch homolog protein 3	Sun et al., 2023 (PMID: 37794186)	54219	European (U.K.)	Continuous	2025-05-06	Q9UM47	NOTCH3	Cardiometabolic
OID20205	Neural proliferation differentiation and control protein 1	Sun et al., 2023 (PMID: 37794186)	54219	European (U.K.)	Continuous	2025-05-06	Q9NQX5	NPDC1	Cardiometabolic
OID20049	Natriuretic peptides B	Sun et al., 2023 (PMID: 37794186)	54219	European (U.K.)	Continuous	2025-05-06	P16860	NPPB	Cardiometabolic
OID20568	C-type natriuretic peptide [Cleaved into: CNP-22; CNP-29; CNP-53]	Sun et al., 2023 (PMID: 37794186)	54219	European (U.K.)	Continuous	2025-05-06	P23582	NPPC	Inflammation
OID20191	Neuronal pentraxin receptor	Sun et al., 2023 (PMID: 37794186)	54219	European (U.K.)	Continuous	2025-05-06	O95502	NPTXR	Cardiometabolic
OID20229	Neuronal cell adhesion molecule	Sun et al., 2023 (PMID: 37794186)	54219	European (U.K.)	Continuous	2025-05-06	Q92823	NRCAM	Cardiometabolic
OID20390	Neuropilin-1	Sun et al., 2023 (PMID: 37794186)	54219	European (U.K.)	Continuous	2025-05-06	O14786	NRP1	Cardiometabolic
OID20465	Neurturin	Sun et al., 2023 (PMID: 37794186)	54219	European (U.K.)	Continuous	2025-05-06	Q99748	NRTN	Inflammation
OID20553	Cytosolic 5'-nucleotidase 3A	Sun et al., 2023 (PMID: 37794186)	54219	European (U.K.)	Continuous	2025-05-06	Q9H0P0	NT5C3A	Inflammation
OID20591	Neurotrophin-3	Sun et al., 2023 (PMID: 37794186)	54219	European (U.K.)	Continuous	2025-05-06	P20783	NTF3	Inflammation
OID20125	NT-proBNP	Sun et al., 2023 (PMID: 37794186)	54219	European (U.K.)	Continuous	2025-05-06	NTproBNP	NTproBNP	Cardiometabolic
OID20136	BDNF/NT-3 growth factors receptor	Sun et al., 2023 (PMID: 37794186)	54219	European (U.K.)	Continuous	2025-05-06	Q16620	NTRK2	Cardiometabolic
OID20510	NEDD8 ultimate buster 1	Sun et al., 2023 (PMID: 37794186)	54219	European (U.K.)	Continuous	2025-05-06	Q9Y5A7	NUB1	Inflammation
OID20623	Nuclear migration protein nudC	Sun et al., 2023 (PMID: 37794186)	54219	European (U.K.)	Continuous	2025-05-06	Q9Y266	NUDC	Inflammation
OID20183	Oxidized low-density lipoprotein receptor 1	Sun et al., 2023 (PMID: 37794186)	54219	European (U.K.)	Continuous	2025-05-06	P78380	OLR1	Cardiometabolic
OID20725	Osteomodulin	Sun et al., 2023 (PMID: 37794186)	54219	European (U.K.)	Continuous	2025-05-06	Q99983	OMD	Inflammation
OID20776	Osteoclast-associated immunoglobulin-like receptor	Sun et al., 2023 (PMID: 37794186)	54219	European (U.K.)	Continuous	2025-05-06	Q8IYS5	OSCAR	Inflammation
OID20574	Oncostatin-M	Sun et al., 2023 (PMID: 37794186)	54219	European (U.K.)	Continuous	2025-05-06	P13725	OSM	Inflammation
OID20356	Oncostatin-M-specific receptor subunit beta	Sun et al., 2023 (PMID: 37794186)	54219	European (U.K.)	Continuous	2025-05-06	Q99650	OSMR	Cardiometabolic
OID20467	Protein-arginine deiminase type-2	Sun et al., 2023 (PMID: 37794186)	54219	European (U.K.)	Continuous	2025-05-06	Q9Y2J8	PADI2	Inflammation
OID20108	Phosphoprotein associated with glycosphingolipid-enriched microdomains 1	Sun et al., 2023 (PMID: 37794186)	54219	European (U.K.)	Continuous	2025-05-06	Q9NWQ8	PAG1	Cardiometabolic
OID20291	Peptidyl-glycine alpha-amidating monooxygenase	Sun et al., 2023 (PMID: 37794186)	54219	European (U.K.)	Continuous	2025-05-06	P19021	PAM	Cardiometabolic
OID20421	Pappalysin-1	Sun et al., 2023 (PMID: 37794186)	54219	European (U.K.)	Continuous	2025-05-06	Q13219	PAPPA	Inflammation
OID20500	Poly [ADP-ribose] polymerase 1	Sun et al., 2023 (PMID: 37794186)	54219	European (U.K.)	Continuous	2025-05-06	P09874	PARP1	Inflammation
OID20614	Protocadherin-1	Sun et al., 2023 (PMID: 37794186)	54219	European (U.K.)	Continuous	2025-05-06	Q08174	PCDH1	Inflammation
OID20132	Protocadherin-17	Sun et al., 2023 (PMID: 37794186)	54219	European (U.K.)	Continuous	2025-05-06	O14917	PCDH17	Cardiometabolic
OID20384	Procollagen C-endopeptidase enhancer 1	Sun et al., 2023 (PMID: 37794186)	54219	European (U.K.)	Continuous	2025-05-06	Q15113	PCOLCE	Cardiometabolic
OID20235	Proprotein convertase subtilisin/kexin type 9	Sun et al., 2023 (PMID: 37794186)	54219	European (U.K.)	Continuous	2025-05-06	Q8NBP7	PCSK9	Cardiometabolic
OID20163	Programmed cell death protein 6	Sun et al., 2023 (PMID: 37794186)	54219	European (U.K.)	Continuous	2025-05-06	O75340	PDCD6	Cardiometabolic
OID20313	Platelet-derived growth factor subunit A	Sun et al., 2023 (PMID: 37794186)	54219	European (U.K.)	Continuous	2025-05-06	P04085	PDGFA	Cardiometabolic
OID20741	Platelet-derived growth factor subunit B	Sun et al., 2023 (PMID: 37794186)	54219	European (U.K.)	Continuous	2025-05-06	P01127	PDGFB	Inflammation
OID20133	Platelet-derived growth factor receptor alpha	Sun et al., 2023 (PMID: 37794186)	54219	European (U.K.)	Continuous	2025-05-06	P16234	PDGFRA	Cardiometabolic
OID20268	Platelet-derived growth factor receptor beta	Sun et al., 2023 (PMID: 37794186)	54219	European (U.K.)	Continuous	2025-05-06	P09619	PDGFRB	Cardiometabolic
OID20729	PDZ and LIM domain protein 7	Sun et al., 2023 (PMID: 37794186)	54219	European (U.K.)	Continuous	2025-05-06	Q9NR12	PDLIM7	Inflammation
OID20257	Platelet endothelial aggregation receptor 1	Sun et al., 2023 (PMID: 37794186)	54219	European (U.K.)	Continuous	2025-05-06	Q5VY43	PEAR1	Cardiometabolic
OID20673	Placenta growth factor	Sun et al., 2023 (PMID: 37794186)	54219	European (U.K.)	Continuous	2025-05-06	P49763	PGF	Inflammation
OID20338	Peptidoglycan recognition protein 1	Sun et al., 2023 (PMID: 37794186)	54219	European (U.K.)	Continuous	2025-05-06	O75594	PGLYRP1	Cardiometabolic
OID20326	Elafin	Sun et al., 2023 (PMID: 37794186)	54219	European (U.K.)	Continuous	2025-05-06	P19957	PI3	Cardiometabolic
OID20587	Phosphoinositide 3-kinase adapter protein 1	Sun et al., 2023 (PMID: 37794186)	54219	European (U.K.)	Continuous	2025-05-06	Q6ZUJ8	PIK3AP1	Inflammation
OID20197	Paired immunoglobulin-like type 2 receptor beta	Sun et al., 2023 (PMID: 37794186)	54219	European (U.K.)	Continuous	2025-05-06	Q9UKJ0	PILRB	Cardiometabolic
OID20682	Pyruvate kinase PKLR	Sun et al., 2023 (PMID: 37794186)	54219	European (U.K.)	Continuous	2025-05-06	P30613	PKLR	Inflammation
OID20252	Phospholipase A2	Sun et al., 2023 (PMID: 37794186)	54219	European (U.K.)	Continuous	2025-05-06	P04054	PLA2G1B	Cardiometabolic
OID20274	Phospholipase A2, membrane associated	Sun et al., 2023 (PMID: 37794186)	54219	European (U.K.)	Continuous	2025-05-06	P14555	PLA2G2A	Cardiometabolic
OID20685	Cytosolic phospholipase A2	Sun et al., 2023 (PMID: 37794186)	54219	European (U.K.)	Continuous	2025-05-06	P47712	PLA2G4A	Inflammation
OID20247	Tissue-type plasminogen activator	Sun et al., 2023 (PMID: 37794186)	54219	European (U.K.)	Continuous	2025-05-06	P00750	PLAT	Cardiometabolic
OID20764	Urokinase plasminogen activator surface receptor	Sun et al., 2023 (PMID: 37794186)	54219	European (U.K.)	Continuous	2025-05-06	Q03405	PLAUR	Inflammation
OID20143	Perilipin-3	Sun et al., 2023 (PMID: 37794186)	54219	European (U.K.)	Continuous	2025-05-06	O60664	PLIN3	Cardiometabolic
OID20144	Pyridoxal phosphate homeostasis protein	Sun et al., 2023 (PMID: 37794186)	54219	European (U.K.)	Continuous	2025-05-06	O94903	PLPBP	Cardiometabolic
OID20238	Phospholipid transfer protein	Sun et al., 2023 (PMID: 37794186)	54219	European (U.K.)	Continuous	2025-05-06	P55058	PLTP	Cardiometabolic
OID20597	Plexin-A4	Sun et al., 2023 (PMID: 37794186)	54219	European (U.K.)	Continuous	2025-05-06	Q9HCM2	PLXNA4	Inflammation
OID20317	Plexin-B2	Sun et al., 2023 (PMID: 37794186)	54219	European (U.K.)	Continuous	2025-05-06	O15031	PLXNB2	Cardiometabolic
OID20160	Plexin-B3	Sun et al., 2023 (PMID: 37794186)	54219	European (U.K.)	Continuous	2025-05-06	Q9ULL4	PLXNB3	Cardiometabolic
OID20149	N-fatty-acyl-amino acid synthase/hydrolase PM20D1	Sun et al., 2023 (PMID: 37794186)	54219	European (U.K.)	Continuous	2025-05-06	Q6GTS8	PM20D1	Cardiometabolic
OID20775	Pancreatic lipase-related protein 2	Sun et al., 2023 (PMID: 37794186)	54219	European (U.K.)	Continuous	2025-05-06	P54317	PNLIPRP2	Inflammation
OID20445	Polyribonucleotide nucleotidyltransferase 1, mitochondrial	Sun et al., 2023 (PMID: 37794186)	54219	European (U.K.)	Continuous	2025-05-06	Q8TCS8	PNPT1	Inflammation
OID20088	Serum paraoxonase/arylesterase 2	Sun et al., 2023 (PMID: 37794186)	54219	European (U.K.)	Continuous	2025-05-06	Q15165	PON2	Cardiometabolic
OID20777	Serum paraoxonase/lactonase 3	Sun et al., 2023 (PMID: 37794186)	54219	European (U.K.)	Continuous	2025-05-06	Q15166	PON3	Inflammation
OID20331	Peptidyl-prolyl cis-trans isomerase B	Sun et al., 2023 (PMID: 37794186)	54219	European (U.K.)	Continuous	2025-05-06	P23284	PPIB	Cardiometabolic
OID20176	Protein phosphatase inhibitor 2	Sun et al., 2023 (PMID: 37794186)	54219	European (U.K.)	Continuous	2025-05-06	P41236	PPP1R2	Cardiometabolic
OID20643	Neurabin-2	Sun et al., 2023 (PMID: 37794186)	54219	European (U.K.)	Continuous	2025-05-06	Q96SB3	PPP1R9B	Inflammation
OID20337	Lysosomal Pro-X carboxypeptidase	Sun et al., 2023 (PMID: 37794186)	54219	European (U.K.)	Continuous	2025-05-06	P42785	PRCP	Cardiometabolic
OID20483	Thioredoxin-dependent peroxide reductase, mitochondrial	Sun et al., 2023 (PMID: 37794186)	54219	European (U.K.)	Continuous	2025-05-06	P30048	PRDX3	Inflammation
OID20644	Peroxiredoxin-5, mitochondrial	Sun et al., 2023 (PMID: 37794186)	54219	European (U.K.)	Continuous	2025-05-06	P30044	PRDX5	Inflammation
OID20439	Prolactin regulatory element-binding protein	Sun et al., 2023 (PMID: 37794186)	54219	European (U.K.)	Continuous	2025-05-06	Q9HCU5	PREB	Inflammation
OID20766	Prolargin	Sun et al., 2023 (PMID: 37794186)	54219	European (U.K.)	Continuous	2025-05-06	P51888	PRELP	Inflammation
OID20444	5'-AMP-activated protein kinase subunit beta-1	Sun et al., 2023 (PMID: 37794186)	54219	European (U.K.)	Continuous	2025-05-06	Q9Y478	PRKAB1	Inflammation
OID20146	cAMP-dependent protein kinase type I-alpha regulatory subunit	Sun et al., 2023 (PMID: 37794186)	54219	European (U.K.)	Continuous	2025-05-06	P10644	PRKAR1A	Cardiometabolic
OID20468	Protein kinase C theta type	Sun et al., 2023 (PMID: 37794186)	54219	European (U.K.)	Continuous	2025-05-06	Q04759	PRKCQ	Inflammation
OID20402	Vitamin K-dependent protein C	Sun et al., 2023 (PMID: 37794186)	54219	European (U.K.)	Continuous	2025-05-06	P04070	PROC	Cardiometabolic
OID20543	Prokineticin-1	Sun et al., 2023 (PMID: 37794186)	54219	European (U.K.)	Continuous	2025-05-06	P58294	PROK1	Inflammation
OID20364	Trypsin-2	Sun et al., 2023 (PMID: 37794186)	54219	European (U.K.)	Continuous	2025-05-06	P07478	PRSS2	Cardiometabolic
OID20212	Serine protease 27	Sun et al., 2023 (PMID: 37794186)	54219	European (U.K.)	Continuous	2025-05-06	Q9BQR3	PRSS27	Cardiometabolic
OID20763	Prostasin	Sun et al., 2023 (PMID: 37794186)	54219	European (U.K.)	Continuous	2025-05-06	Q16651	PRSS8	Inflammation
OID20329	Myeloblastin	Sun et al., 2023 (PMID: 37794186)	54219	European (U.K.)	Continuous	2025-05-06	P24158	PRTN3	Cardiometabolic
OID20534	PC4 and SFRS1-interacting protein	Sun et al., 2023 (PMID: 37794186)	54219	European (U.K.)	Continuous	2025-05-06	O75475	PSIP1	Inflammation
OID20549	Proteasome assembly chaperone 3	Sun et al., 2023 (PMID: 37794186)	54219	European (U.K.)	Continuous	2025-05-06	Q9BT73	PSMG3	Inflammation
OID20511	Persephin	Sun et al., 2023 (PMID: 37794186)	54219	European (U.K.)	Continuous	2025-05-06	O60542	PSPN	Inflammation
OID20408	Prostaglandin-H2 D-isomerase	Sun et al., 2023 (PMID: 37794186)	54219	European (U.K.)	Continuous	2025-05-06	P41222	PTGDS	Cardiometabolic
OID20571	Parathyroid hormone/parathyroid hormone-related peptide receptor	Sun et al., 2023 (PMID: 37794186)	54219	European (U.K.)	Continuous	2025-05-06	Q03431	PTH1R	Inflammation
OID20083	Pleiotrophin	Sun et al., 2023 (PMID: 37794186)	54219	European (U.K.)	Continuous	2025-05-06	P21246	PTN	Cardiometabolic
OID20717	Tyrosine-protein phosphatase non-receptor type 6	Sun et al., 2023 (PMID: 37794186)	54219	European (U.K.)	Continuous	2025-05-06	P29350	PTPN6	Inflammation
OID20310	Receptor-type tyrosine-protein phosphatase F	Sun et al., 2023 (PMID: 37794186)	54219	European (U.K.)	Continuous	2025-05-06	P10586	PTPRF	Cardiometabolic
OID20598	Receptor-type tyrosine-protein phosphatase mu	Sun et al., 2023 (PMID: 37794186)	54219	European (U.K.)	Continuous	2025-05-06	P28827	PTPRM	Inflammation
OID20306	Receptor-type tyrosine-protein phosphatase S	Sun et al., 2023 (PMID: 37794186)	54219	European (U.K.)	Continuous	2025-05-06	Q13332	PTPRS	Cardiometabolic
OID20570	Pentraxin-related protein PTX3	Sun et al., 2023 (PMID: 37794186)	54219	European (U.K.)	Continuous	2025-05-06	P26022	PTX3	Inflammation
OID20174	Dihydropteridine reductase	Sun et al., 2023 (PMID: 37794186)	54219	European (U.K.)	Continuous	2025-05-06	P09417	QDPR	Cardiometabolic
OID20320	Glutaminyl-peptide cyclotransferase	Sun et al., 2023 (PMID: 37794186)	54219	European (U.K.)	Continuous	2025-05-06	Q16769	QPCT	Cardiometabolic
OID20425	Ras-related protein Rab-37	Sun et al., 2023 (PMID: 37794186)	54219	European (U.K.)	Continuous	2025-05-06	Q96AX2	RAB37	Inflammation
OID20608	Ras-related protein Rab-6A	Sun et al., 2023 (PMID: 37794186)	54219	European (U.K.)	Continuous	2025-05-06	P20340	RAB6A	Inflammation
OID20447	Rab GTPase-activating protein 1-like	Sun et al., 2023 (PMID: 37794186)	54219	European (U.K.)	Continuous	2025-05-06	Q5R372	RABGAP1L	Inflammation
OID20373	Retinoic acid receptor responder protein 2	Sun et al., 2023 (PMID: 37794186)	54219	European (U.K.)	Continuous	2025-05-06	Q99969	RARRES2	Cardiometabolic
OID20073	REST corepressor 1	Sun et al., 2023 (PMID: 37794186)	54219	European (U.K.)	Continuous	2025-05-06	Q9UKL0	RCOR1	Cardiometabolic
OID20415	Lithostathine-1-alpha	Sun et al., 2023 (PMID: 37794186)	54219	European (U.K.)	Continuous	2025-05-06	P05451	REG1A	Cardiometabolic
OID20266	Lithostathine-1-beta	Sun et al., 2023 (PMID: 37794186)	54219	European (U.K.)	Continuous	2025-05-06	P48304	REG1B	Cardiometabolic
OID20258	Regenerating islet-derived protein 3-alpha	Sun et al., 2023 (PMID: 37794186)	54219	European (U.K.)	Continuous	2025-05-06	Q06141	REG3A	Cardiometabolic
OID20784	Regenerating islet-derived protein 4	Sun et al., 2023 (PMID: 37794186)	54219	European (U.K.)	Continuous	2025-05-06	Q9BYZ8	REG4	Inflammation
OID20201	Renin	Sun et al., 2023 (PMID: 37794186)	54219	European (U.K.)	Continuous	2025-05-06	P00797	REN	Cardiometabolic
OID20327	Resistin	Sun et al., 2023 (PMID: 37794186)	54219	European (U.K.)	Continuous	2025-05-06	Q9HD89	RETN	Cardiometabolic
OID20454	Regulator of G-protein signaling 8	Sun et al., 2023 (PMID: 37794186)	54219	European (U.K.)	Continuous	2025-05-06	P57771	RGS8	Inflammation
OID20203	Eosinophil cationic protein	Sun et al., 2023 (PMID: 37794186)	54219	European (U.K.)	Continuous	2025-05-06	P12724	RNASE3	Cardiometabolic
OID20321	Ribonuclease T2	Sun et al., 2023 (PMID: 37794186)	54219	European (U.K.)	Continuous	2025-05-06	O00584	RNASET2	Cardiometabolic
OID20734	Roundabout homolog 1	Sun et al., 2023 (PMID: 37794186)	54219	European (U.K.)	Continuous	2025-05-06	Q9Y6N7	ROBO1	Inflammation
OID20224	Inactive tyrosine-protein kinase transmembrane receptor ROR1	Sun et al., 2023 (PMID: 37794186)	54219	European (U.K.)	Continuous	2025-05-06	Q01973	ROR1	Cardiometabolic
OID20130	Protein S100-A11	Sun et al., 2023 (PMID: 37794186)	54219	European (U.K.)	Continuous	2025-05-06	P31949	S100A11	Cardiometabolic
OID20103	Protein S100-P	Sun et al., 2023 (PMID: 37794186)	54219	European (U.K.)	Continuous	2025-05-06	P25815	S100P	Cardiometabolic
OID20536	Sterile alpha motif domain-containing protein 9-like	Sun et al., 2023 (PMID: 37794186)	54219	European (U.K.)	Continuous	2025-05-06	Q8IVG5	SAMD9L	Inflammation
OID20297	Scavenger receptor class F member 1	Sun et al., 2023 (PMID: 37794186)	54219	European (U.K.)	Continuous	2025-05-06	Q14162	SCARF1	Cardiometabolic
OID20728	Secretogranin-3	Sun et al., 2023 (PMID: 37794186)	54219	European (U.K.)	Continuous	2025-05-06	Q8WXD2	SCG3	Inflammation
OID20688	Uteroglobin	Sun et al., 2023 (PMID: 37794186)	54219	European (U.K.)	Continuous	2025-05-06	P11684	SCGB1A1	Inflammation
OID20723	Secretoglobin family 3A member 2	Sun et al., 2023 (PMID: 37794186)	54219	European (U.K.)	Continuous	2025-05-06	Q96PL1	SCGB3A2	Inflammation
OID20457	Secretagogin	Sun et al., 2023 (PMID: 37794186)	54219	European (U.K.)	Continuous	2025-05-06	O76038	SCGN	Inflammation
OID20542	Secernin-1	Sun et al., 2023 (PMID: 37794186)	54219	European (U.K.)	Continuous	2025-05-06	Q12765	SCRN1	Inflammation
OID20169	Syndecan-1	Sun et al., 2023 (PMID: 37794186)	54219	European (U.K.)	Continuous	2025-05-06	P18827	SDC1	Cardiometabolic
OID20216	Syndecan-4	Sun et al., 2023 (PMID: 37794186)	54219	European (U.K.)	Continuous	2025-05-06	P31431	SDC4	Cardiometabolic
OID20290	E-selectin	Sun et al., 2023 (PMID: 37794186)	54219	European (U.K.)	Continuous	2025-05-06	P16581	SELE	Cardiometabolic
OID20379	P-selectin	Sun et al., 2023 (PMID: 37794186)	54219	European (U.K.)	Continuous	2025-05-06	P16109	SELP	Cardiometabolic
OID20560	P-selectin glycoprotein ligand 1	Sun et al., 2023 (PMID: 37794186)	54219	European (U.K.)	Continuous	2025-05-06	Q14242	SELPLG	Inflammation
OID20186	Semaphorin-3F	Sun et al., 2023 (PMID: 37794186)	54219	European (U.K.)	Continuous	2025-05-06	Q13275	SEMA3F	Cardiometabolic
OID20283	Semaphorin-7A	Sun et al., 2023 (PMID: 37794186)	54219	European (U.K.)	Continuous	2025-05-06	O75326	SEMA7A	Cardiometabolic
OID20281	Serpin A11	Sun et al., 2023 (PMID: 37794186)	54219	European (U.K.)	Continuous	2025-05-06	Q86U17	SERPINA11	Cardiometabolic
OID20219	Serpin A12	Sun et al., 2023 (PMID: 37794186)	54219	European (U.K.)	Continuous	2025-05-06	Q8IW75	SERPINA12	Cardiometabolic
OID20064	Serpin B5	Sun et al., 2023 (PMID: 37794186)	54219	European (U.K.)	Continuous	2025-05-06	P36952	SERPINB5	Cardiometabolic
OID20630	Serpin B8	Sun et al., 2023 (PMID: 37794186)	54219	European (U.K.)	Continuous	2025-05-06	P50452	SERPINB8	Inflammation
OID20342	Plasminogen activator inhibitor 1	Sun et al., 2023 (PMID: 37794186)	54219	European (U.K.)	Continuous	2025-05-06	P05121	SERPINE1	Cardiometabolic
OID20214	Pulmonary surfactant-associated protein D	Sun et al., 2023 (PMID: 37794186)	54219	European (U.K.)	Continuous	2025-05-06	P35247	SFTPD	Cardiometabolic
OID20514	SH2 domain-containing protein 1A	Sun et al., 2023 (PMID: 37794186)	54219	European (U.K.)	Continuous	2025-05-06	O60880	SH2D1A	Inflammation
OID20714	Serine hydroxymethyltransferase, cytosolic	Sun et al., 2023 (PMID: 37794186)	54219	European (U.K.)	Continuous	2025-05-06	P34896	SHMT1	Inflammation
OID20690	Sialoadhesin	Sun et al., 2023 (PMID: 37794186)	54219	European (U.K.)	Continuous	2025-05-06	Q9BZZ2	SIGLEC1	Inflammation
OID20537	Sialic acid-binding Ig-like lectin 10	Sun et al., 2023 (PMID: 37794186)	54219	European (U.K.)	Continuous	2025-05-06	Q96LC7	SIGLEC10	Inflammation
OID20190	Sialic acid-binding Ig-like lectin 7	Sun et al., 2023 (PMID: 37794186)	54219	European (U.K.)	Continuous	2025-05-06	Q9Y286	SIGLEC7	Cardiometabolic
OID20304	Tyrosine-protein phosphatase non-receptor type substrate 1	Sun et al., 2023 (PMID: 37794186)	54219	European (U.K.)	Continuous	2025-05-06	P78324	SIRPA	Cardiometabolic
OID20739	Signal-regulatory protein beta-1	Sun et al., 2023 (PMID: 37794186)	54219	European (U.K.)	Continuous	2025-05-06	O00241	SIRPB1	Inflammation
OID20462	Signaling threshold-regulating transmembrane adapter 1	Sun et al., 2023 (PMID: 37794186)	54219	European (U.K.)	Continuous	2025-05-06	Q9Y3P8	SIT1	Inflammation
OID20761	Src kinase-associated phosphoprotein 2	Sun et al., 2023 (PMID: 37794186)	54219	European (U.K.)	Continuous	2025-05-06	O75563	SKAP2	Inflammation
OID20496	Signaling lymphocytic activation molecule	Sun et al., 2023 (PMID: 37794186)	54219	European (U.K.)	Continuous	2025-05-06	Q13291	SLAMF1	Inflammation
OID20602	SLAM family member 7	Sun et al., 2023 (PMID: 37794186)	54219	European (U.K.)	Continuous	2025-05-06	Q9NQ25	SLAMF7	Inflammation
OID20539	Zinc transporter ZIP5	Sun et al., 2023 (PMID: 37794186)	54219	European (U.K.)	Continuous	2025-05-06	Q6ZMH5	SLC39A5	Inflammation
OID20094	SLIT and NTRK-like protein 6	Sun et al., 2023 (PMID: 37794186)	54219	European (U.K.)	Continuous	2025-05-06	Q9H5Y7	SLITRK6	Cardiometabolic
OID20730	SPARC-related modular calcium-binding protein 2	Sun et al., 2023 (PMID: 37794186)	54219	European (U.K.)	Continuous	2025-05-06	Q9H3U7	SMOC2	Inflammation
OID20676	Acid sphingomyelinase-like phosphodiesterase 3a	Sun et al., 2023 (PMID: 37794186)	54219	European (U.K.)	Continuous	2025-05-06	Q92484	SMPDL3A	Inflammation
OID20218	Synaptosomal-associated protein 23	Sun et al., 2023 (PMID: 37794186)	54219	European (U.K.)	Continuous	2025-05-06	O00161	SNAP23	Cardiometabolic
OID20135	Sorting nexin-9	Sun et al., 2023 (PMID: 37794186)	54219	European (U.K.)	Continuous	2025-05-06	Q9Y5X1	SNX9	Cardiometabolic
OID20386	Superoxide dismutase [Cu-Zn]	Sun et al., 2023 (PMID: 37794186)	54219	European (U.K.)	Continuous	2025-05-06	P00441	SOD1	Cardiometabolic
OID20213	Sortilin	Sun et al., 2023 (PMID: 37794186)	54219	European (U.K.)	Continuous	2025-05-06	Q99523	SORT1	Cardiometabolic
OID20204	Sclerostin	Sun et al., 2023 (PMID: 37794186)	54219	European (U.K.)	Continuous	2025-05-06	Q9BQB4	SOST	Cardiometabolic
OID20361	SPARC-like protein 1	Sun et al., 2023 (PMID: 37794186)	54219	European (U.K.)	Continuous	2025-05-06	Q14515	SPARCL1	Cardiometabolic
OID20509	Serine protease inhibitor Kazal-type 4	Sun et al., 2023 (PMID: 37794186)	54219	European (U.K.)	Continuous	2025-05-06	O60575	SPINK4	Inflammation
OID20720	Kunitz-type protease inhibitor 2	Sun et al., 2023 (PMID: 37794186)	54219	European (U.K.)	Continuous	2025-05-06	O43291	SPINT2	Inflammation
OID20759	Spondin-1	Sun et al., 2023 (PMID: 37794186)	54219	European (U.K.)	Continuous	2025-05-06	Q9HCB6	SPON1	Inflammation
OID20221	Spondin-2	Sun et al., 2023 (PMID: 37794186)	54219	European (U.K.)	Continuous	2025-05-06	Q9BUD6	SPON2	Cardiometabolic
OID20322	Osteopontin	Sun et al., 2023 (PMID: 37794186)	54219	European (U.K.)	Continuous	2025-05-06	P10451	SPP1	Cardiometabolic
OID20475	Protein sprouty homolog 2	Sun et al., 2023 (PMID: 37794186)	54219	European (U.K.)	Continuous	2025-05-06	O43597	SPRY2	Inflammation
OID20502	SRSF protein kinase 2	Sun et al., 2023 (PMID: 37794186)	54219	European (U.K.)	Continuous	2025-05-06	P78362	SRPK2	Inflammation
OID20182	Scavenger receptor cysteine-rich domain-containing group B protein	Sun et al., 2023 (PMID: 37794186)	54219	European (U.K.)	Continuous	2025-05-06	Q8WTU2	SSC4D	Cardiometabolic
OID20351	Soluble scavenger receptor cysteine-rich domain-containing protein SSC5D	Sun et al., 2023 (PMID: 37794186)	54219	European (U.K.)	Continuous	2025-05-06	A1L4H1	SSC5D	Cardiometabolic
OID20302	Beta-galactoside alpha-2,6-sialyltransferase 1	Sun et al., 2023 (PMID: 37794186)	54219	European (U.K.)	Continuous	2025-05-06	P15907	ST6GAL1	Cardiometabolic
OID20077	Serine/threonine-protein kinase STK11	Sun et al., 2023 (PMID: 37794186)	54219	European (U.K.)	Continuous	2025-05-06	Q15831	STK11	Cardiometabolic
OID20140	Serine/threonine-protein kinase 4	Sun et al., 2023 (PMID: 37794186)	54219	European (U.K.)	Continuous	2025-05-06	Q13043	STK4	Cardiometabolic
OID20531	Syntaxin-8	Sun et al., 2023 (PMID: 37794186)	54219	European (U.K.)	Continuous	2025-05-06	Q9UNK0	STX8	Inflammation
OID20508	Bile salt sulfotransferase	Sun et al., 2023 (PMID: 37794186)	54219	European (U.K.)	Continuous	2025-05-06	Q06520	SULT2A1	Inflammation
OID20072	Sushi domain-containing protein 1	Sun et al., 2023 (PMID: 37794186)	54219	European (U.K.)	Continuous	2025-05-06	Q6UWL2	SUSD1	Cardiometabolic
OID20474	TRAF family member-associated NF-kappa-B activator	Sun et al., 2023 (PMID: 37794186)	54219	European (U.K.)	Continuous	2025-05-06	Q92844	TANK	Inflammation
OID20521	TBC1 domain family member 5	Sun et al., 2023 (PMID: 37794186)	54219	European (U.K.)	Continuous	2025-05-06	Q92609	TBC1D5	Inflammation
OID20058	T-cell leukemia/lymphoma protein 1B	Sun et al., 2023 (PMID: 37794186)	54219	European (U.K.)	Continuous	2025-05-06	O95988	TCL1B	Cardiometabolic
OID20341	Transcobalamin-2	Sun et al., 2023 (PMID: 37794186)	54219	European (U.K.)	Continuous	2025-05-06	P20062	TCN2	Cardiometabolic
OID20787	Trefoil factor 2	Sun et al., 2023 (PMID: 37794186)	54219	European (U.K.)	Continuous	2025-05-06	Q03403	TFF2	Inflammation
OID20371	Trefoil factor 3	Sun et al., 2023 (PMID: 37794186)	54219	European (U.K.)	Continuous	2025-05-06	Q07654	TFF3	Cardiometabolic
OID20388	Tissue factor pathway inhibitor	Sun et al., 2023 (PMID: 37794186)	54219	European (U.K.)	Continuous	2025-05-06	P10646	TFPI	Cardiometabolic
OID20369	Transferrin receptor protein 1	Sun et al., 2023 (PMID: 37794186)	54219	European (U.K.)	Continuous	2025-05-06	P02786	TFRC	Cardiometabolic
OID20600	Protransforming growth factor alpha [Cleaved into: Transforming growth factor alpha	Sun et al., 2023 (PMID: 37794186)	54219	European (U.K.)	Continuous	2025-05-06	P01135	TGFA	Inflammation
OID20621	Transforming growth factor beta-1 proprotein [Cleaved into: Latency-associated peptide	Sun et al., 2023 (PMID: 37794186)	54219	European (U.K.)	Continuous	2025-05-06	P01137	TGFB1	Inflammation
OID20417	Transforming growth factor-beta-induced protein ig-h3	Sun et al., 2023 (PMID: 37794186)	54219	European (U.K.)	Continuous	2025-05-06	Q15582	TGFBI	Cardiometabolic
OID20255	Transforming growth factor beta receptor type 3	Sun et al., 2023 (PMID: 37794186)	54219	European (U.K.)	Continuous	2025-05-06	Q03167	TGFBR3	Cardiometabolic
OID20141	Protein-glutamine gamma-glutamyltransferase 2	Sun et al., 2023 (PMID: 37794186)	54219	European (U.K.)	Continuous	2025-05-06	P21980	TGM2	Cardiometabolic
OID20231	Thrombomodulin	Sun et al., 2023 (PMID: 37794186)	54219	European (U.K.)	Continuous	2025-05-06	P07204	THBD	Cardiometabolic
OID20368	Thrombospondin-4	Sun et al., 2023 (PMID: 37794186)	54219	European (U.K.)	Continuous	2025-05-06	P35443	THBS4	Cardiometabolic
OID20194	Thimet oligopeptidase	Sun et al., 2023 (PMID: 37794186)	54219	European (U.K.)	Continuous	2025-05-06	P52888	THOP1	Cardiometabolic
OID20098	Thrombopoietin	Sun et al., 2023 (PMID: 37794186)	54219	European (U.K.)	Continuous	2025-05-06	P40225	THPO	Cardiometabolic
OID20068	Nucleolysin TIA-1 isoform p40	Sun et al., 2023 (PMID: 37794186)	54219	European (U.K.)	Continuous	2025-05-06	P31483	TIA1	Cardiometabolic
OID20303	Tyrosine-protein kinase receptor Tie-1	Sun et al., 2023 (PMID: 37794186)	54219	European (U.K.)	Continuous	2025-05-06	P35590	TIE1	Cardiometabolic
OID20375	T-cell immunoglobulin and mucin domain-containing protein 4	Sun et al., 2023 (PMID: 37794186)	54219	European (U.K.)	Continuous	2025-05-06	Q96H15	TIMD4	Cardiometabolic
OID20418	Metalloproteinase inhibitor 1	Sun et al., 2023 (PMID: 37794186)	54219	European (U.K.)	Continuous	2025-05-06	P01033	TIMP1	Cardiometabolic
OID20684	Metalloproteinase inhibitor 3	Sun et al., 2023 (PMID: 37794186)	54219	European (U.K.)	Continuous	2025-05-06	P35625	TIMP3	Inflammation
OID20180	Tubulointerstitial nephritis antigen-like	Sun et al., 2023 (PMID: 37794186)	54219	European (U.K.)	Continuous	2025-05-06	Q9GZM7	TINAGL1	Cardiometabolic
OID20612	Toll-like receptor 3	Sun et al., 2023 (PMID: 37794186)	54219	European (U.K.)	Continuous	2025-05-06	O15455	TLR3	Inflammation
OID20359	Tenascin	Sun et al., 2023 (PMID: 37794186)	54219	European (U.K.)	Continuous	2025-05-06	P24821	TNC	Cardiometabolic
OID20074	Tumor necrosis factor	Sun et al., 2023 (PMID: 37794186)	54219	European (U.K.)	Continuous	2025-05-06	P01375	TNF	Cardiometabolic
OID20473	Tumor necrosis factor	Sun et al., 2023 (PMID: 37794186)	54219	European (U.K.)	Continuous	2025-05-06	P01375	TNF	Inflammation
OID20433	Tumor necrosis factor alpha-induced protein 8	Sun et al., 2023 (PMID: 37794186)	54219	European (U.K.)	Continuous	2025-05-06	O95379	TNFAIP8	Inflammation
OID20265	Tumor necrosis factor receptor superfamily member 10C	Sun et al., 2023 (PMID: 37794186)	54219	European (U.K.)	Continuous	2025-05-06	O14798	TNFRSF10C	Cardiometabolic
OID20646	Tumor necrosis factor receptor superfamily member 11A	Sun et al., 2023 (PMID: 37794186)	54219	European (U.K.)	Continuous	2025-05-06	Q9Y6Q6	TNFRSF11A	Inflammation
OID20735	Tumor necrosis factor receptor superfamily member 11B	Sun et al., 2023 (PMID: 37794186)	54219	European (U.K.)	Continuous	2025-05-06	O00300	TNFRSF11B	Inflammation
OID20702	Tumor necrosis factor receptor superfamily member 13B	Sun et al., 2023 (PMID: 37794186)	54219	European (U.K.)	Continuous	2025-05-06	O14836	TNFRSF13B	Inflammation
OID20480	Tumor necrosis factor receptor superfamily member 13C	Sun et al., 2023 (PMID: 37794186)	54219	European (U.K.)	Continuous	2025-05-06	Q96RJ3	TNFRSF13C	Inflammation
OID20783	Tumor necrosis factor receptor superfamily member 14	Sun et al., 2023 (PMID: 37794186)	54219	European (U.K.)	Continuous	2025-05-06	Q92956	TNFRSF14	Inflammation
OID20653	Tumor necrosis factor receptor superfamily member 4	Sun et al., 2023 (PMID: 37794186)	54219	European (U.K.)	Continuous	2025-05-06	P43489	TNFRSF4	Inflammation
OID20611	Tumor necrosis factor ligand superfamily member 10	Sun et al., 2023 (PMID: 37794186)	54219	European (U.K.)	Continuous	2025-05-06	P50591	TNFSF10	Inflammation
OID20592	Tumor necrosis factor ligand superfamily member 11	Sun et al., 2023 (PMID: 37794186)	54219	European (U.K.)	Continuous	2025-05-06	O14788	TNFSF11	Inflammation
OID20624	Tumor necrosis factor ligand superfamily member 12	Sun et al., 2023 (PMID: 37794186)	54219	European (U.K.)	Continuous	2025-05-06	O43508	TNFSF12	Inflammation
OID20733	Tumor necrosis factor ligand superfamily member 13	Sun et al., 2023 (PMID: 37794186)	54219	European (U.K.)	Continuous	2025-05-06	O75888	TNFSF13	Inflammation
OID20272	Tumor necrosis factor ligand superfamily member 13B	Sun et al., 2023 (PMID: 37794186)	54219	European (U.K.)	Continuous	2025-05-06	Q9Y275	TNFSF13B	Cardiometabolic
OID20050	Troponin I, cardiac muscle	Sun et al., 2023 (PMID: 37794186)	54219	European (U.K.)	Continuous	2025-05-06	P19429	TNNI3	Cardiometabolic
OID20120	Tumor protein p53-inducible nuclear protein 1	Sun et al., 2023 (PMID: 37794186)	54219	European (U.K.)	Continuous	2025-05-06	Q96A56	TP53INP1	Cardiometabolic
OID20750	Tripeptidyl-peptidase 1	Sun et al., 2023 (PMID: 37794186)	54219	European (U.K.)	Continuous	2025-05-06	O14773	TPP1	Inflammation
OID20642	Tryptase alpha/beta-1	Sun et al., 2023 (PMID: 37794186)	54219	European (U.K.)	Continuous	2025-05-06	Q15661	TPSAB1	Inflammation
OID20476	Translationally-controlled tumor protein	Sun et al., 2023 (PMID: 37794186)	54219	European (U.K.)	Continuous	2025-05-06	P13693	TPT1	Inflammation
OID20507	TNF receptor-associated factor 2	Sun et al., 2023 (PMID: 37794186)	54219	European (U.K.)	Continuous	2025-05-06	Q12933	TRAF2	Inflammation
OID20731	Triggering receptor expressed on myeloid cells 2	Sun et al., 2023 (PMID: 37794186)	54219	European (U.K.)	Continuous	2025-05-06	Q9NZC2	TREM2	Inflammation
OID20533	E3 ubiquitin-protein ligase TRIM21	Sun et al., 2023 (PMID: 37794186)	54219	European (U.K.)	Continuous	2025-05-06	P19474	TRIM21	Inflammation
OID20526	Tripartite motif-containing protein 5	Sun et al., 2023 (PMID: 37794186)	54219	European (U.K.)	Continuous	2025-05-06	Q9C035	TRIM5	Inflammation
OID20129	Thyrotropin subunit beta	Sun et al., 2023 (PMID: 37794186)	54219	European (U.K.)	Continuous	2025-05-06	P01222	TSHB	Cardiometabolic
OID20056	Thymic stromal lymphopoietin	Sun et al., 2023 (PMID: 37794186)	54219	European (U.K.)	Continuous	2025-05-06	Q969D9	TSLP	Cardiometabolic
OID20078	Tetraspanin-1	Sun et al., 2023 (PMID: 37794186)	54219	European (U.K.)	Continuous	2025-05-06	O60635	TSPAN1	Cardiometabolic
OID20234	Thymidine phosphorylase	Sun et al., 2023 (PMID: 37794186)	54219	European (U.K.)	Continuous	2025-05-06	P19971	TYMP	Cardiometabolic
OID20161	Tyrosine-protein kinase receptor TYRO3	Sun et al., 2023 (PMID: 37794186)	54219	European (U.K.)	Continuous	2025-05-06	Q06418	TYRO3	Cardiometabolic
OID20237	Uromodulin	Sun et al., 2023 (PMID: 37794186)	54219	European (U.K.)	Continuous	2025-05-06	P07911	UMOD	Cardiometabolic
OID20110	Ubiquitin carboxyl-terminal hydrolase 8	Sun et al., 2023 (PMID: 37794186)	54219	European (U.K.)	Continuous	2025-05-06	P40818	USP8	Cardiometabolic
OID20071	Vesicle-associated membrane protein 5	Sun et al., 2023 (PMID: 37794186)	54219	European (U.K.)	Continuous	2025-05-06	O95183	VAMP5	Cardiometabolic
OID20516	Tubulinyl-Tyr carboxypeptidase 1	Sun et al., 2023 (PMID: 37794186)	54219	European (U.K.)	Continuous	2025-05-06	Q7L8A9	VASH1	Inflammation
OID20345	Vasorin	Sun et al., 2023 (PMID: 37794186)	54219	European (U.K.)	Continuous	2025-05-06	Q6EMK4	VASN	Cardiometabolic
OID20396	Vascular cell adhesion protein 1	Sun et al., 2023 (PMID: 37794186)	54219	European (U.K.)	Continuous	2025-05-06	P19320	VCAM1	Cardiometabolic
OID20650	Vascular endothelial growth factor A	Sun et al., 2023 (PMID: 37794186)	54219	European (U.K.)	Continuous	2025-05-06	P15692	VEGFA	Inflammation
OID20662	Vascular endothelial growth factor D	Sun et al., 2023 (PMID: 37794186)	54219	European (U.K.)	Continuous	2025-05-06	O43915	VEGFD	Inflammation
OID20053	Vimentin	Sun et al., 2023 (PMID: 37794186)	54219	European (U.K.)	Continuous	2025-05-06	P08670	VIM	Cardiometabolic
OID20131	V-type immunoglobulin domain-containing suppressor of T-cell activation	Sun et al., 2023 (PMID: 37794186)	54219	European (U.K.)	Continuous	2025-05-06	Q9H7M9	VSIR	Cardiometabolic
OID20067	V-set and transmembrane domain-containing protein 2-like protein	Sun et al., 2023 (PMID: 37794186)	54219	European (U.K.)	Continuous	2025-05-06	Q96N03	VSTM2L	Cardiometabolic
OID20256	von Willebrand factor	Sun et al., 2023 (PMID: 37794186)	54219	European (U.K.)	Continuous	2025-05-06	P04275	VWF	Cardiometabolic
OID20479	Wiskott-Aldrich syndrome protein	Sun et al., 2023 (PMID: 37794186)	54219	European (U.K.)	Continuous	2025-05-06	P42768	WAS	Inflammation
OID20091	Wiskott-Aldrich syndrome protein family member 1	Sun et al., 2023 (PMID: 37794186)	54219	European (U.K.)	Continuous	2025-05-06	Q92558	WASF1	Cardiometabolic
OID20785	WAP, Kazal, immunoglobulin, Kunitz and NTR domain-containing protein 2	Sun et al., 2023 (PMID: 37794186)	54219	European (U.K.)	Continuous	2025-05-06	Q8TEU8	WFIKKN2	Inflammation
OID20460	Protein Wnt-9a	Sun et al., 2023 (PMID: 37794186)	54219	European (U.K.)	Continuous	2025-05-06	O14904	WNT9A	Inflammation
OID20259	Glycoprotein Xg	Sun et al., 2023 (PMID: 37794186)	54219	European (U.K.)	Continuous	2025-05-06	P55808	XG	Cardiometabolic
OID20478	YTH domain-containing family protein 3	Sun et al., 2023 (PMID: 37794186)	54219	European (U.K.)	Continuous	2025-05-06	Q7Z739	YTHDF3	Inflammation
OID20082	Zinc finger and BTB domain-containing protein 17	Sun et al., 2023 (PMID: 37794186)	54219	European (U.K.)	Continuous	2025-05-06	Q13105	ZBTB17	Cardiometabolic
OID30771	Alpha-1B-glycoprotein	Sun et al., 2023 (PMID: 37794186)	54219	European (U.K.)	Continuous	2025-05-06	P04217	A1BG	Inflammation_II
OID30236	Mth938 domain-containing protein	Sun et al., 2023 (PMID: 37794186)	54219	European (U.K.)	Continuous	2025-05-06	Q9H7C9	AAMDC	Cardiometabolic_II
OID30146	ATP-binding cassette sub-family A member 2	Sun et al., 2023 (PMID: 37794186)	54219	European (U.K.)	Continuous	2025-05-06	Q9BZC7	ABCA2	Cardiometabolic_II
OID30675	Histo-blood group ABO system transferase	Sun et al., 2023 (PMID: 37794186)	54219	European (U.K.)	Continuous	2025-05-06	P16442	ABO	Inflammation_II
OID30130	BRISC complex subunit Abraxas 2	Sun et al., 2023 (PMID: 37794186)	54219	European (U.K.)	Continuous	2025-05-06	Q15018	ABRAXAS2	Cardiometabolic_II
OID30356	Short/branched chain specific acyl-CoA dehydrogenase, mitochondrial	Sun et al., 2023 (PMID: 37794186)	54219	European (U.K.)	Continuous	2025-05-06	P45954	ACADSB	Cardiometabolic_II
OID30696	Angiotensin-converting enzyme	Sun et al., 2023 (PMID: 37794186)	54219	European (U.K.)	Continuous	2025-05-06	P12821	ACE	Inflammation_II
OID30585	Acetylcholinesterase	Sun et al., 2023 (PMID: 37794186)	54219	European (U.K.)	Continuous	2025-05-06	P22303	ACHE	Inflammation_II
OID30524	Low molecular weight phosphotyrosine protein phosphatase	Sun et al., 2023 (PMID: 37794186)	54219	European (U.K.)	Continuous	2025-05-06	P24666	ACP1	Inflammation_II
OID30513	Acrosomal protein SP-10	Sun et al., 2023 (PMID: 37794186)	54219	European (U.K.)	Continuous	2025-05-06	P26436	ACRV1	Inflammation_II
OID30080	Long-chain-fatty-acid--CoA ligase 1	Sun et al., 2023 (PMID: 37794186)	54219	European (U.K.)	Continuous	2025-05-06	P33121	ACSL1	Cardiometabolic_II
OID30192	Alpha-actinin-2	Sun et al., 2023 (PMID: 37794186)	54219	European (U.K.)	Continuous	2025-05-06	P35609	ACTN2	Cardiometabolic_II
OID30086	N-acyl-aromatic-L-amino acid amidohydrolase	Sun et al., 2023 (PMID: 37794186)	54219	European (U.K.)	Continuous	2025-05-06	Q96HD9	ACY3	Cardiometabolic_II
OID30642	Acylphosphatase-1	Sun et al., 2023 (PMID: 37794186)	54219	European (U.K.)	Continuous	2025-05-06	P07311	ACYP1	Inflammation_II
OID30491	Disintegrin and metalloproteinase domain-containing protein 12	Sun et al., 2023 (PMID: 37794186)	54219	European (U.K.)	Continuous	2025-05-06	O43184	ADAM12	Inflammation_II
OID30528	A disintegrin and metalloproteinase with thrombospondin motifs 1	Sun et al., 2023 (PMID: 37794186)	54219	European (U.K.)	Continuous	2025-05-06	Q9UHI8	ADAMTS1	Inflammation_II
OID30471	A disintegrin and metalloproteinase with thrombospondin motifs 4	Sun et al., 2023 (PMID: 37794186)	54219	European (U.K.)	Continuous	2025-05-06	O75173	ADAMTS4	Inflammation_II
OID30370	ADAMTS-like protein 2	Sun et al., 2023 (PMID: 37794186)	54219	European (U.K.)	Continuous	2025-05-06	Q86TH1	ADAMTSL2	Cardiometabolic_II
OID30275	ADAMTS-like protein 4	Sun et al., 2023 (PMID: 37794186)	54219	European (U.K.)	Continuous	2025-05-06	Q6UY14	ADAMTSL4	Cardiometabolic_II
OID30355	ADAMTS-like protein 5	Sun et al., 2023 (PMID: 37794186)	54219	European (U.K.)	Continuous	2025-05-06	Q6ZMM2	ADAMTSL5	Cardiometabolic_II
OID30655	Alpha-adducin	Sun et al., 2023 (PMID: 37794186)	54219	European (U.K.)	Continuous	2025-05-06	P35611	ADD1	Inflammation_II
OID30588	Adhesion G-protein coupled receptor D1	Sun et al., 2023 (PMID: 37794186)	54219	European (U.K.)	Continuous	2025-05-06	Q6QNK2	ADGRD1	Inflammation_II
OID30349	Adhesion G protein-coupled receptor F5	Sun et al., 2023 (PMID: 37794186)	54219	European (U.K.)	Continuous	2025-05-06	Q8IZF2	ADGRF5	Cardiometabolic_II
OID30612	All-trans-retinol dehydrogenase	Sun et al., 2023 (PMID: 37794186)	54219	European (U.K.)	Continuous	2025-05-06	P00325	ADH1B	Inflammation_II
OID30748	Adiponectin	Sun et al., 2023 (PMID: 37794186)	54219	European (U.K.)	Continuous	2025-05-06	Q15848	ADIPOQ	Inflammation_II
OID30067	Alpha-2A adrenergic receptor	Sun et al., 2023 (PMID: 37794186)	54219	European (U.K.)	Continuous	2025-05-06	P08913	ADRA2A	Cardiometabolic_II
OID30569	Actin filament-associated protein 1	Sun et al., 2023 (PMID: 37794186)	54219	European (U.K.)	Continuous	2025-05-06	Q8N556	AFAP1	Inflammation_II
OID30741	Afamin	Sun et al., 2023 (PMID: 37794186)	54219	European (U.K.)	Continuous	2025-05-06	P43652	AFM	Inflammation_II
OID30709	Angiotensinogen	Sun et al., 2023 (PMID: 37794186)	54219	European (U.K.)	Continuous	2025-05-06	P01019	AGT	Inflammation_II
OID30260	Neuroblast differentiation-associated protein AHNAK	Sun et al., 2023 (PMID: 37794186)	54219	European (U.K.)	Continuous	2025-05-06	Q09666	AHNAK	Cardiometabolic_II
OID30244	Protein AHNAK2	Sun et al., 2023 (PMID: 37794186)	54219	European (U.K.)	Continuous	2025-05-06	Q8IVF2	AHNAK2	Cardiometabolic_II
OID30706	Alpha-2-HS-glycoprotein	Sun et al., 2023 (PMID: 37794186)	54219	European (U.K.)	Continuous	2025-05-06	P02765	AHSG	Inflammation_II
OID30204	Allograft inflammatory factor 1-like	Sun et al., 2023 (PMID: 37794186)	54219	European (U.K.)	Continuous	2025-05-06	Q9BQI0	AIF1L	Cardiometabolic_II
OID30571	A-kinase anchor protein 12	Sun et al., 2023 (PMID: 37794186)	54219	European (U.K.)	Continuous	2025-05-06	Q02952	AKAP12	Inflammation_II
OID30488	Aflatoxin B1 aldehyde reductase member 4	Sun et al., 2023 (PMID: 37794186)	54219	European (U.K.)	Continuous	2025-05-06	Q8NHP1	AKR7L	Inflammation_II
OID30497	Intestinal-type alkaline phosphatase	Sun et al., 2023 (PMID: 37794186)	54219	European (U.K.)	Continuous	2025-05-06	P09923	ALPI	Inflammation_II
OID30366	N-acetylglucosamine-6-phosphate deacetylase	Sun et al., 2023 (PMID: 37794186)	54219	European (U.K.)	Continuous	2025-05-06	Q9Y303	AMDHD2	Cardiometabolic_II
OID30572	Angiomotin	Sun et al., 2023 (PMID: 37794186)	54219	European (U.K.)	Continuous	2025-05-06	Q4VCS5	AMOT	Inflammation_II
OID30707	Alpha-amylase 1A_Alpha-amylase 1B_Alpha-amylase 1C	Sun et al., 2023 (PMID: 37794186)	54219	European (U.K.)	Continuous	2025-05-06	P0DUB6_P0DTE7_P0DTE8	AMY1A_AMY1B_AMY1C	Inflammation_II
OID30161	Ankyrin-2	Sun et al., 2023 (PMID: 37794186)	54219	European (U.K.)	Continuous	2025-05-06	Q01484	ANK2	Cardiometabolic_II
OID30518	Ankyrin repeat and MYND domain-containing protein 2	Sun et al., 2023 (PMID: 37794186)	54219	European (U.K.)	Continuous	2025-05-06	Q8IV38	ANKMY2	Inflammation_II
OID30203	Acidic leucine-rich nuclear phosphoprotein 32 family member C	Sun et al., 2023 (PMID: 37794186)	54219	European (U.K.)	Continuous	2025-05-06	O43423	ANP32C	Cardiometabolic_II
OID30617	Annexin A1	Sun et al., 2023 (PMID: 37794186)	54219	European (U.K.)	Continuous	2025-05-06	P04083	ANXA1	Inflammation_II
OID30263	Annexin A2	Sun et al., 2023 (PMID: 37794186)	54219	European (U.K.)	Continuous	2025-05-06	P07355	ANXA2	Cardiometabolic_II
OID30778	Serum amyloid P-component	Sun et al., 2023 (PMID: 37794186)	54219	European (U.K.)	Continuous	2025-05-06	P02743	APCS	Inflammation_II
OID30769	Apolipoprotein A-I	Sun et al., 2023 (PMID: 37794186)	54219	European (U.K.)	Continuous	2025-05-06	P02647	APOA1	Inflammation_II
OID30686	Apolipoprotein A-II	Sun et al., 2023 (PMID: 37794186)	54219	European (U.K.)	Continuous	2025-05-06	P02652	APOA2	Inflammation_II
OID30733	Apolipoprotein A-IV	Sun et al., 2023 (PMID: 37794186)	54219	European (U.K.)	Continuous	2025-05-06	P06727	APOA4	Inflammation_II
OID30673	Apolipoprotein B-100	Sun et al., 2023 (PMID: 37794186)	54219	European (U.K.)	Continuous	2025-05-06	P04114	APOB	Inflammation_II
OID30246	Apolipoprotein B receptor	Sun et al., 2023 (PMID: 37794186)	54219	European (U.K.)	Continuous	2025-05-06	Q0VD83	APOBR	Cardiometabolic_II
OID30749	Apolipoprotein C-I	Sun et al., 2023 (PMID: 37794186)	54219	European (U.K.)	Continuous	2025-05-06	P02654	APOC1	Inflammation_II
OID30746	Apolipoprotein D	Sun et al., 2023 (PMID: 37794186)	54219	European (U.K.)	Continuous	2025-05-06	P05090	APOD	Inflammation_II
OID30727	Apolipoprotein E	Sun et al., 2023 (PMID: 37794186)	54219	European (U.K.)	Continuous	2025-05-06	P02649	APOE	Inflammation_II
OID30701	Apolipoprotein F	Sun et al., 2023 (PMID: 37794186)	54219	European (U.K.)	Continuous	2025-05-06	Q13790	APOF	Inflammation_II
OID30708	Apolipoprotein L1	Sun et al., 2023 (PMID: 37794186)	54219	European (U.K.)	Continuous	2025-05-06	O14791	APOL1	Inflammation_II
OID30590	DCC-interacting protein 13-beta	Sun et al., 2023 (PMID: 37794186)	54219	European (U.K.)	Continuous	2025-05-06	Q8NEU8	APPL2	Inflammation_II
OID30653	Rho GTPase-activating protein 45	Sun et al., 2023 (PMID: 37794186)	54219	European (U.K.)	Continuous	2025-05-06	Q92619	ARHGAP45	Inflammation_II
OID30166	ADP-ribosylation factor-like protein 13B	Sun et al., 2023 (PMID: 37794186)	54219	European (U.K.)	Continuous	2025-05-06	Q3SXY8	ARL13B	Cardiometabolic_II
OID30121	ADP-ribosylation factor-like protein 2-binding protein	Sun et al., 2023 (PMID: 37794186)	54219	European (U.K.)	Continuous	2025-05-06	Q9Y2Y0	ARL2BP	Cardiometabolic_II
OID30168	Aryl hydrocarbon receptor nuclear translocator-like protein 1	Sun et al., 2023 (PMID: 37794186)	54219	European (U.K.)	Continuous	2025-05-06	O00327	ARNTL	Cardiometabolic_II
OID30415	Acid ceramidase	Sun et al., 2023 (PMID: 37794186)	54219	European (U.K.)	Continuous	2025-05-06	Q13510	ASAH1	Cardiometabolic_II
OID30679	Asialoglycoprotein receptor 2	Sun et al., 2023 (PMID: 37794186)	54219	European (U.K.)	Continuous	2025-05-06	P07307	ASGR2	Inflammation_II
OID30315	Asporin	Sun et al., 2023 (PMID: 37794186)	54219	European (U.K.)	Continuous	2025-05-06	Q9BXN1	ASPN	Cardiometabolic_II
OID30283	Isoaspartyl peptidase/L-asparaginase	Sun et al., 2023 (PMID: 37794186)	54219	European (U.K.)	Continuous	2025-05-06	Q7L266	ASRGL1	Cardiometabolic_II
OID30170	Argininosuccinate synthase	Sun et al., 2023 (PMID: 37794186)	54219	European (U.K.)	Continuous	2025-05-06	P00966	ASS1	Cardiometabolic_II
OID30124	Sodium/potassium-transporting ATPase subunit beta-1	Sun et al., 2023 (PMID: 37794186)	54219	European (U.K.)	Continuous	2025-05-06	P05026	ATP1B1	Cardiometabolic_II
OID30118	Sodium/potassium-transporting ATPase subunit beta-2	Sun et al., 2023 (PMID: 37794186)	54219	European (U.K.)	Continuous	2025-05-06	P14415	ATP1B2	Cardiometabolic_II
OID30065	Sodium/potassium-transporting ATPase subunit beta-3	Sun et al., 2023 (PMID: 37794186)	54219	European (U.K.)	Continuous	2025-05-06	P54709	ATP1B3	Cardiometabolic_II
OID30062	Plasma membrane calcium-transporting ATPase 4	Sun et al., 2023 (PMID: 37794186)	54219	European (U.K.)	Continuous	2025-05-06	P23634	ATP2B4	Cardiometabolic_II
OID30079	ATP synthase subunit delta, mitochondrial	Sun et al., 2023 (PMID: 37794186)	54219	European (U.K.)	Continuous	2025-05-06	P30049	ATP5F1D	Cardiometabolic_II
OID30242	V-type proton ATPase subunit G 1	Sun et al., 2023 (PMID: 37794186)	54219	European (U.K.)	Continuous	2025-05-06	O75348	ATP6V1G1	Cardiometabolic_II
OID30167	V-type proton ATPase subunit G 2	Sun et al., 2023 (PMID: 37794186)	54219	European (U.K.)	Continuous	2025-05-06	O95670	ATP6V1G2	Cardiometabolic_II
OID30735	Attractin, Isoform 2	Sun et al., 2023 (PMID: 37794186)	54219	European (U.K.)	Continuous	2025-05-06	O75882-2	ATRN	Inflammation_II
OID30725	Beta-2-microglobulin	Sun et al., 2023 (PMID: 37794186)	54219	European (U.K.)	Continuous	2025-05-06	P61769	B2M	Inflammation_II
OID30165	Galactosylgalactosylxylosylprotein 3-beta-glucuronosyltransferase 3	Sun et al., 2023 (PMID: 37794186)	54219	European (U.K.)	Continuous	2025-05-06	O94766	B3GAT3	Cardiometabolic_II
OID30281	UDP-GlcNAc:betaGal beta-1,3-N-acetylglucosaminyltransferase 7	Sun et al., 2023 (PMID: 37794186)	54219	European (U.K.)	Continuous	2025-05-06	Q8NFL0	B3GNT7	Cardiometabolic_II
OID30466	BRISC and BRCA1-A complex member 1	Sun et al., 2023 (PMID: 37794186)	54219	European (U.K.)	Continuous	2025-05-06	Q9NWV8	BABAM1	Inflammation_II
OID30474	BAG family molecular chaperone regulator 4	Sun et al., 2023 (PMID: 37794186)	54219	European (U.K.)	Continuous	2025-05-06	O95429	BAG4	Inflammation_II
OID30312	Branched-chain-amino-acid aminotransferase, cytosolic	Sun et al., 2023 (PMID: 37794186)	54219	European (U.K.)	Continuous	2025-05-06	P54687	BCAT1	Cardiometabolic_II
OID30717	Cholinesterase	Sun et al., 2023 (PMID: 37794186)	54219	European (U.K.)	Continuous	2025-05-06	P06276	BCHE	Inflammation_II
OID30498	Bcl-2-like protein 15	Sun et al., 2023 (PMID: 37794186)	54219	European (U.K.)	Continuous	2025-05-06	Q5TBC7	BCL2L15	Inflammation_II
OID30373	Brain-derived neurotrophic factor	Sun et al., 2023 (PMID: 37794186)	54219	European (U.K.)	Continuous	2025-05-06	P23560	BDNF	Cardiometabolic_II
OID30220	Beclin-1	Sun et al., 2023 (PMID: 37794186)	54219	European (U.K.)	Continuous	2025-05-06	Q14457	BECN1	Cardiometabolic_II
OID30389	Osteocalcin	Sun et al., 2023 (PMID: 37794186)	54219	European (U.K.)	Continuous	2025-05-06	P02818	BGLAP	Cardiometabolic_II
OID30051	S-methylmethionine--homocysteine S-methyltransferase BHMT2	Sun et al., 2023 (PMID: 37794186)	54219	European (U.K.)	Continuous	2025-05-06	Q9H2M3	BHMT2	Cardiometabolic_II
OID30541	B-cell linker protein	Sun et al., 2023 (PMID: 37794186)	54219	European (U.K.)	Continuous	2025-05-06	Q8WV28	BLNK	Inflammation_II
OID30575	Bone morphogenetic protein 10	Sun et al., 2023 (PMID: 37794186)	54219	European (U.K.)	Continuous	2025-05-06	O95393	BMP10	Inflammation_II
OID30615	BMP-binding endothelial regulator protein	Sun et al., 2023 (PMID: 37794186)	54219	European (U.K.)	Continuous	2025-05-06	Q8N8U9	BMPER	Inflammation_II
OID30292	BCL2/adenovirus E1B 19 kDa protein-interacting protein 2	Sun et al., 2023 (PMID: 37794186)	54219	European (U.K.)	Continuous	2025-05-06	Q12982	BNIP2	Cardiometabolic_II
OID30525	BCL2/adenovirus E1B 19 kDa protein-interacting protein 3-like	Sun et al., 2023 (PMID: 37794186)	54219	European (U.K.)	Continuous	2025-05-06	O60238	BNIP3L	Inflammation_II
OID30267	BolA-like protein 2	Sun et al., 2023 (PMID: 37794186)	54219	European (U.K.)	Continuous	2025-05-06	Q9H3K6	BOLA2_BOLA2B	Cardiometabolic_II
OID30279	BPI fold-containing family A member 2	Sun et al., 2023 (PMID: 37794186)	54219	European (U.K.)	Continuous	2025-05-06	Q96DR5	BPIFA2	Cardiometabolic_II
OID30311	BPI fold-containing family B member 2	Sun et al., 2023 (PMID: 37794186)	54219	European (U.K.)	Continuous	2025-05-06	Q8N4F0	BPIFB2	Cardiometabolic_II
OID30093	Bromodomain-containing protein 3	Sun et al., 2023 (PMID: 37794186)	54219	European (U.K.)	Continuous	2025-05-06	Q15059	BRD3	Cardiometabolic_II
OID30179	Bromodomain testis-specific protein	Sun et al., 2023 (PMID: 37794186)	54219	European (U.K.)	Continuous	2025-05-06	Q58F21	BRDT	Cardiometabolic_II
OID30754	Biotinidase	Sun et al., 2023 (PMID: 37794186)	54219	European (U.K.)	Continuous	2025-05-06	P43251	BTD	Inflammation_II
OID30180	C1GALT1-specific chaperone 1	Sun et al., 2023 (PMID: 37794186)	54219	European (U.K.)	Continuous	2025-05-06	Q96EU7	C1GALT1C1	Cardiometabolic_II
OID30515	Complement C1q-like protein 2	Sun et al., 2023 (PMID: 37794186)	54219	European (U.K.)	Continuous	2025-05-06	Q7Z5L3	C1QL2	Inflammation_II
OID30618	Complement C1q tumor necrosis factor-related protein 5	Sun et al., 2023 (PMID: 37794186)	54219	European (U.K.)	Continuous	2025-05-06	Q9BXJ0	C1QTNF5	Inflammation_II
OID30620	Complement C1q and tumor necrosis factor-related protein 9A	Sun et al., 2023 (PMID: 37794186)	54219	European (U.K.)	Continuous	2025-05-06	P0C862	C1QTNF9	Inflammation_II
OID30753	Complement C1r subcomponent	Sun et al., 2023 (PMID: 37794186)	54219	European (U.K.)	Continuous	2025-05-06	P00736	C1R	Inflammation_II
OID30721	Complement C1r subcomponent-like protein	Sun et al., 2023 (PMID: 37794186)	54219	European (U.K.)	Continuous	2025-05-06	Q9NZP8	C1RL	Inflammation_II
OID30731	Complement C1s subcomponent	Sun et al., 2023 (PMID: 37794186)	54219	European (U.K.)	Continuous	2025-05-06	P09871	C1S	Inflammation_II
OID30776	Complement C3	Sun et al., 2023 (PMID: 37794186)	54219	European (U.K.)	Continuous	2025-05-06	P01024	C3	Inflammation_II
OID30744	Complement C5	Sun et al., 2023 (PMID: 37794186)	54219	European (U.K.)	Continuous	2025-05-06	P01031	C5	Inflammation_II
OID30766	Complement component C7	Sun et al., 2023 (PMID: 37794186)	54219	European (U.K.)	Continuous	2025-05-06	P10643	C7	Inflammation_II
OID30719	Complement component C8 beta chain	Sun et al., 2023 (PMID: 37794186)	54219	European (U.K.)	Continuous	2025-05-06	P07358	C8B	Inflammation_II
OID30698	Complement component C9	Sun et al., 2023 (PMID: 37794186)	54219	European (U.K.)	Continuous	2025-05-06	P02748	C9	Inflammation_II
OID30482	Carbonic anhydrase-related protein	Sun et al., 2023 (PMID: 37794186)	54219	European (U.K.)	Continuous	2025-05-06	P35219	CA8	Inflammation_II
OID30064	Voltage-dependent T-type calcium channel subunit alpha-1H	Sun et al., 2023 (PMID: 37794186)	54219	European (U.K.)	Continuous	2025-05-06	O95180	CACNA1H	Cardiometabolic_II
OID30649	Calcyclin-binding protein	Sun et al., 2023 (PMID: 37794186)	54219	European (U.K.)	Continuous	2025-05-06	Q9HB71	CACYBP	Inflammation_II
OID30249	Calcium-binding and coiled-coil domain-containing protein 2	Sun et al., 2023 (PMID: 37794186)	54219	European (U.K.)	Continuous	2025-05-06	Q13137	CALCOCO2	Cardiometabolic_II
OID30144	Neuron-specific vesicular protein calcyon	Sun et al., 2023 (PMID: 37794186)	54219	European (U.K.)	Continuous	2025-05-06	Q9NYX4	CALY	Cardiometabolic_II
OID30530	Caspase-9	Sun et al., 2023 (PMID: 37794186)	54219	European (U.K.)	Continuous	2025-05-06	P55211	CASP9	Inflammation_II
OID30063	Calsequestrin-2	Sun et al., 2023 (PMID: 37794186)	54219	European (U.K.)	Continuous	2025-05-06	O14958	CASQ2	Cardiometabolic_II
OID30712	Catalase	Sun et al., 2023 (PMID: 37794186)	54219	European (U.K.)	Continuous	2025-05-06	P04040	CAT	Inflammation_II
OID30200	Cystathionine beta-synthase	Sun et al., 2023 (PMID: 37794186)	54219	European (U.K.)	Continuous	2025-05-06	P35520	CBS	Cardiometabolic_II
OID30177	Chromobox protein homolog 2	Sun et al., 2023 (PMID: 37794186)	54219	European (U.K.)	Continuous	2025-05-06	Q14781	CBX2	Cardiometabolic_II
OID30221	Coiled-coil domain-containing glutamate-rich protein 2	Sun et al., 2023 (PMID: 37794186)	54219	European (U.K.)	Continuous	2025-05-06	I3L3R5	CCER2	Cardiometabolic_II
OID30456	G1/S-specific cyclin-E1	Sun et al., 2023 (PMID: 37794186)	54219	European (U.K.)	Continuous	2025-05-06	P24864	CCNE1	Inflammation_II
OID30097	T-cell surface antigen CD2	Sun et al., 2023 (PMID: 37794186)	54219	European (U.K.)	Continuous	2025-05-06	P06729	CD2	Cardiometabolic_II
OID30556	CD226 antigen	Sun et al., 2023 (PMID: 37794186)	54219	European (U.K.)	Continuous	2025-05-06	Q15762	CD226	Inflammation_II
OID30394	Endosialin	Sun et al., 2023 (PMID: 37794186)	54219	European (U.K.)	Continuous	2025-05-06	Q9HCU0	CD248	Cardiometabolic_II
OID30576	CMRF35-like molecule 8	Sun et al., 2023 (PMID: 37794186)	54219	European (U.K.)	Continuous	2025-05-06	Q9UGN4	CD300A	Inflammation_II
OID30485	Platelet glycoprotein 4	Sun et al., 2023 (PMID: 37794186)	54219	European (U.K.)	Continuous	2025-05-06	P16671	CD36	Inflammation_II
OID30448	T-cell surface glycoprotein CD3 gamma chain	Sun et al., 2023 (PMID: 37794186)	54219	European (U.K.)	Continuous	2025-05-06	P09693	CD3G	Inflammation_II
OID30775	CD5 antigen-like	Sun et al., 2023 (PMID: 37794186)	54219	European (U.K.)	Continuous	2025-05-06	O43866	CD5L	Inflammation_II
OID30543	T-cell antigen CD7	Sun et al., 2023 (PMID: 37794186)	54219	European (U.K.)	Continuous	2025-05-06	P09564	CD7	Inflammation_II
OID30641	B-cell differentiation antigen CD72	Sun et al., 2023 (PMID: 37794186)	54219	European (U.K.)	Continuous	2025-05-06	P21854	CD72	Inflammation_II
OID30291	T-lymphocyte activation antigen CD80	Sun et al., 2023 (PMID: 37794186)	54219	European (U.K.)	Continuous	2025-05-06	P33681	CD80	Cardiometabolic_II
OID30345	Cytidine deaminase	Sun et al., 2023 (PMID: 37794186)	54219	European (U.K.)	Continuous	2025-05-06	P32320	CDA	Cardiometabolic_II
OID30362	Carcinoembryonic antigen-related cell adhesion molecule 6	Sun et al., 2023 (PMID: 37794186)	54219	European (U.K.)	Continuous	2025-05-06	P40199	CEACAM6	Cardiometabolic_II
OID30458	CCAAT/enhancer-binding protein alpha	Sun et al., 2023 (PMID: 37794186)	54219	European (U.K.)	Continuous	2025-05-06	P49715	CEBPA	Inflammation_II
OID30411	Chymotrypsin-like elastase family member 2A	Sun et al., 2023 (PMID: 37794186)	54219	European (U.K.)	Continuous	2025-05-06	P08217	CELA2A	Cardiometabolic_II
OID30593	Cadherin EGF LAG seven-pass G-type receptor 2	Sun et al., 2023 (PMID: 37794186)	54219	European (U.K.)	Continuous	2025-05-06	Q9HCU4	CELSR2	Inflammation_II
OID30499	Cell surface hyaluronidase	Sun et al., 2023 (PMID: 37794186)	54219	European (U.K.)	Continuous	2025-05-06	Q9UHN6	CEMIP2	Inflammation_II
OID30115	Centrosomal protein of 112 kDa	Sun et al., 2023 (PMID: 37794186)	54219	European (U.K.)	Continuous	2025-05-06	Q8N8E3	CEP112	Cardiometabolic_II
OID30240	Centrosomal protein of 170 kDa	Sun et al., 2023 (PMID: 37794186)	54219	European (U.K.)	Continuous	2025-05-06	Q5SW79	CEP170	Cardiometabolic_II
OID30755	Complement factor B	Sun et al., 2023 (PMID: 37794186)	54219	European (U.K.)	Continuous	2025-05-06	P00751	CFB	Inflammation_II
OID30738	Complement factor D	Sun et al., 2023 (PMID: 37794186)	54219	European (U.K.)	Continuous	2025-05-06	P00746	CFD	Inflammation_II
OID30790	Complement factor H	Sun et al., 2023 (PMID: 37794186)	54219	European (U.K.)	Continuous	2025-05-06	P08603	CFH	Inflammation_II
OID30720	Complement factor H-related protein 2	Sun et al., 2023 (PMID: 37794186)	54219	European (U.K.)	Continuous	2025-05-06	P36980	CFHR2	Inflammation_II
OID30758	Complement factor H-related protein 4	Sun et al., 2023 (PMID: 37794186)	54219	European (U.K.)	Continuous	2025-05-06	Q92496	CFHR4	Inflammation_II
OID30716	Complement factor H-related protein 5	Sun et al., 2023 (PMID: 37794186)	54219	European (U.K.)	Continuous	2025-05-06	Q9BXR6	CFHR5	Inflammation_II
OID30772	Complement factor I	Sun et al., 2023 (PMID: 37794186)	54219	European (U.K.)	Continuous	2025-05-06	P05156	CFI	Inflammation_II
OID30784	Properdin	Sun et al., 2023 (PMID: 37794186)	54219	European (U.K.)	Continuous	2025-05-06	P27918	CFP	Inflammation_II
OID30671	Choriogonadotropin subunit beta 3	Sun et al., 2023 (PMID: 37794186)	54219	European (U.K.)	Continuous	2025-05-06	P0DN86	CGB3_CGB5_CGB8	Inflammation_II
OID30660	Chondroadherin	Sun et al., 2023 (PMID: 37794186)	54219	European (U.K.)	Continuous	2025-05-06	O15335	CHAD	Inflammation_II
OID30403	Chromogranin-A	Sun et al., 2023 (PMID: 37794186)	54219	European (U.K.)	Continuous	2025-05-06	P10645	CHGA	Cardiometabolic_II
OID30327	Charged multivesicular body protein 6	Sun et al., 2023 (PMID: 37794186)	54219	European (U.K.)	Continuous	2025-05-06	Q96FZ7	CHMP6	Cardiometabolic_II
OID30399	Cartilage intermediate layer protein 1	Sun et al., 2023 (PMID: 37794186)	54219	European (U.K.)	Continuous	2025-05-06	O75339	CILP	Cardiometabolic_II
OID30400	Creatine kinase B-type	Sun et al., 2023 (PMID: 37794186)	54219	European (U.K.)	Continuous	2025-05-06	P12277	CKB	Cardiometabolic_II
OID30552	C-type lectin domain family 12 member A	Sun et al., 2023 (PMID: 37794186)	54219	European (U.K.)	Continuous	2025-05-06	Q5QGZ9	CLEC12A	Inflammation_II
OID30756	Tetranectin	Sun et al., 2023 (PMID: 37794186)	54219	European (U.K.)	Continuous	2025-05-06	P05452	CLEC3B	Inflammation_II
OID30405	C-type lectin domain family 4 member M	Sun et al., 2023 (PMID: 37794186)	54219	European (U.K.)	Continuous	2025-05-06	Q9H2X3	CLEC4M	Cardiometabolic_II
OID30732	Clusterin	Sun et al., 2023 (PMID: 37794186)	54219	European (U.K.)	Continuous	2025-05-06	P10909	CLU	Inflammation_II
OID30360	COX assembly mitochondrial protein homolog	Sun et al., 2023 (PMID: 37794186)	54219	European (U.K.)	Continuous	2025-05-06	Q7Z7K0	CMC1	Cardiometabolic_II
OID30285	2',3'-cyclic-nucleotide 3'-phosphodiesterase	Sun et al., 2023 (PMID: 37794186)	54219	European (U.K.)	Continuous	2025-05-06	P09543	CNP	Cardiometabolic_II
OID30305	Cochlin	Sun et al., 2023 (PMID: 37794186)	54219	European (U.K.)	Continuous	2025-05-06	O43405	COCH	Cardiometabolic_II
OID30396	Collagen alpha-1(XV) chain	Sun et al., 2023 (PMID: 37794186)	54219	European (U.K.)	Continuous	2025-05-06	P39059	COL15A1	Cardiometabolic_II
OID30286	Collagen alpha-1(II) chain	Sun et al., 2023 (PMID: 37794186)	54219	European (U.K.)	Continuous	2025-05-06	P02458	COL2A1	Cardiometabolic_II
OID30379	Collagen alpha-1(III) chain	Sun et al., 2023 (PMID: 37794186)	54219	European (U.K.)	Continuous	2025-05-06	P02461	COL3A1	Cardiometabolic_II
OID30587	Collagen alpha-1(V) chain	Sun et al., 2023 (PMID: 37794186)	54219	European (U.K.)	Continuous	2025-05-06	P20908	COL5A1	Inflammation_II
OID30222	COMM domain-containing protein 1	Sun et al., 2023 (PMID: 37794186)	54219	European (U.K.)	Continuous	2025-05-06	Q8N668	COMMD1	Cardiometabolic_II
OID30173	Coatomer subunit beta'	Sun et al., 2023 (PMID: 37794186)	54219	European (U.K.)	Continuous	2025-05-06	P35606	COPB2	Cardiometabolic_II
OID30217	5-demethoxyubiquinone hydroxylase, mitochondrial	Sun et al., 2023 (PMID: 37794186)	54219	European (U.K.)	Continuous	2025-05-06	Q99807	COQ7	Cardiometabolic_II
OID30317	Cytochrome c oxidase subunit 6B1	Sun et al., 2023 (PMID: 37794186)	54219	European (U.K.)	Continuous	2025-05-06	P14854	COX6B1	Cardiometabolic_II
OID30606	Carboxypeptidase A4	Sun et al., 2023 (PMID: 37794186)	54219	European (U.K.)	Continuous	2025-05-06	Q9UI42	CPA4	Inflammation_II
OID30734	Carboxypeptidase B2	Sun et al., 2023 (PMID: 37794186)	54219	European (U.K.)	Continuous	2025-05-06	Q96IY4	CPB2	Inflammation_II
OID30495	Oxygen-dependent coproporphyrinogen-III oxidase, mitochondrial	Sun et al., 2023 (PMID: 37794186)	54219	European (U.K.)	Continuous	2025-05-06	P36551	CPOX	Inflammation_II
OID30406	Carboxypeptidase Q	Sun et al., 2023 (PMID: 37794186)	54219	European (U.K.)	Continuous	2025-05-06	Q9Y646	CPQ	Cardiometabolic_II
OID30106	Ceramide-1-phosphate transfer protein	Sun et al., 2023 (PMID: 37794186)	54219	European (U.K.)	Continuous	2025-05-06	Q5TA50	CPTP	Cardiometabolic_II
OID30322	Inactive carboxypeptidase-like protein X2	Sun et al., 2023 (PMID: 37794186)	54219	European (U.K.)	Continuous	2025-05-06	Q8N436	CPXM2	Cardiometabolic_II
OID30697	Complement receptor type 1	Sun et al., 2023 (PMID: 37794186)	54219	European (U.K.)	Continuous	2025-05-06	P17927	CR1	Inflammation_II
OID30619	Protein disulfide isomerase CRELD1	Sun et al., 2023 (PMID: 37794186)	54219	European (U.K.)	Continuous	2025-05-06	Q96HD1	CRELD1	Inflammation_II
OID30715	Cysteine-rich secretory protein 3	Sun et al., 2023 (PMID: 37794186)	54219	European (U.K.)	Continuous	2025-05-06	P54108	CRISP3	Inflammation_II
OID30319	Beta-crystallin B1	Sun et al., 2023 (PMID: 37794186)	54219	European (U.K.)	Continuous	2025-05-06	P53674	CRYBB1	Cardiometabolic_II
OID30272	Quinone oxidoreductase-like protein 1	Sun et al., 2023 (PMID: 37794186)	54219	European (U.K.)	Continuous	2025-05-06	O95825	CRYZL1	Cardiometabolic_II
OID30183	Cold shock domain-containing protein E1	Sun et al., 2023 (PMID: 37794186)	54219	European (U.K.)	Continuous	2025-05-06	O75534	CSDE1	Cardiometabolic_II
OID30681	Macrophage colony-stimulating factor 1 receptor	Sun et al., 2023 (PMID: 37794186)	54219	European (U.K.)	Continuous	2025-05-06	P07333	CSF1R	Inflammation_II
OID30072	Granulocyte-macrophage colony-stimulating factor	Sun et al., 2023 (PMID: 37794186)	54219	European (U.K.)	Continuous	2025-05-06	P04141	CSF2	Cardiometabolic_II
OID30553	Cytokine receptor common subunit beta	Sun et al., 2023 (PMID: 37794186)	54219	European (U.K.)	Continuous	2025-05-06	P32927	CSF2RB	Inflammation_II
OID30527	Granulocyte colony-stimulating factor receptor	Sun et al., 2023 (PMID: 37794186)	54219	European (U.K.)	Continuous	2025-05-06	Q99062	CSF3R	Inflammation_II
OID30667	Chorionic somatomammotropin hormone 1	Sun et al., 2023 (PMID: 37794186)	54219	European (U.K.)	Continuous	2025-05-06	P0DML2	CSH1	Inflammation_II
OID30492	Casein kinase I isoform delta	Sun et al., 2023 (PMID: 37794186)	54219	European (U.K.)	Continuous	2025-05-06	P48730	CSNK1D	Inflammation_II
OID30397	Chondroitin sulfate proteoglycan 4	Sun et al., 2023 (PMID: 37794186)	54219	European (U.K.)	Continuous	2025-05-06	Q6UVK1	CSPG4	Cardiometabolic_II
OID30176	Cysteine and glycine-rich protein 3	Sun et al., 2023 (PMID: 37794186)	54219	European (U.K.)	Continuous	2025-05-06	P50461	CSRP3	Cardiometabolic_II
OID30581	Cystatin-SN	Sun et al., 2023 (PMID: 37794186)	54219	European (U.K.)	Continuous	2025-05-06	P01037	CST1	Inflammation_II
OID30710	Di-N-acetylchitobiase	Sun et al., 2023 (PMID: 37794186)	54219	European (U.K.)	Continuous	2025-05-06	Q01459	CTBS	Inflammation_II
OID30393	Collagen triple helix repeat-containing protein 1	Sun et al., 2023 (PMID: 37794186)	54219	European (U.K.)	Continuous	2025-05-06	Q96CG8	CTHRC1	Cardiometabolic_II
OID30363	Cytotoxic T-lymphocyte protein 4	Sun et al., 2023 (PMID: 37794186)	54219	European (U.K.)	Continuous	2025-05-06	P16410	CTLA4	Cardiometabolic_II
OID30628	Cathepsin E	Sun et al., 2023 (PMID: 37794186)	54219	European (U.K.)	Continuous	2025-05-06	P14091	CTSE	Inflammation_II
OID30091	1,25-dihydroxyvitamin D(3) 24-hydroxylase, mitochondrial	Sun et al., 2023 (PMID: 37794186)	54219	European (U.K.)	Continuous	2025-05-06	Q07973	CYP24A1	Cardiometabolic_II
OID30374	Cytokine-like protein 1	Sun et al., 2023 (PMID: 37794186)	54219	European (U.K.)	Continuous	2025-05-06	Q9NRR1	CYTL1	Cardiometabolic_II
OID30664	Disheveled-associated activator of morphogenesis 1	Sun et al., 2023 (PMID: 37794186)	54219	European (U.K.)	Continuous	2025-05-06	Q9Y4D1	DAAM1	Inflammation_II
OID30420	DAN domain family member 5	Sun et al., 2023 (PMID: 37794186)	54219	European (U.K.)	Continuous	2025-05-06	Q8N907	DAND5	Inflammation_II
OID30505	Death-associated protein kinase 2	Sun et al., 2023 (PMID: 37794186)	54219	European (U.K.)	Continuous	2025-05-06	Q9UIK4	DAPK2	Inflammation_II
OID30703	Dopamine beta-hydroxylase	Sun et al., 2023 (PMID: 37794186)	54219	European (U.K.)	Continuous	2025-05-06	P09172	DBH	Inflammation_II
OID30549	Drebrin	Sun et al., 2023 (PMID: 37794186)	54219	European (U.K.)	Continuous	2025-05-06	Q16643	DBN1	Inflammation_II
OID30657	Deoxycytidylate deaminase	Sun et al., 2023 (PMID: 37794186)	54219	European (U.K.)	Continuous	2025-05-06	P32321	DCTD	Inflammation_II
OID30126	DET1- and DDB1-associated protein 1	Sun et al., 2023 (PMID: 37794186)	54219	European (U.K.)	Continuous	2025-05-06	Q9BW61	DDA1	Cardiometabolic_II
OID30602	Protein DDI1 homolog 2	Sun et al., 2023 (PMID: 37794186)	54219	European (U.K.)	Continuous	2025-05-06	Q5TDH0	DDI2	Inflammation_II
OID30372	D-dopachrome decarboxylase	Sun et al., 2023 (PMID: 37794186)	54219	European (U.K.)	Continuous	2025-05-06	P30046	DDT	Cardiometabolic_II
OID30494	ATP-dependent RNA helicase DDX39A	Sun et al., 2023 (PMID: 37794186)	54219	European (U.K.)	Continuous	2025-05-06	O00148	DDX39A	Inflammation_II
OID30431	Probable ATP-dependent RNA helicase DDX4	Sun et al., 2023 (PMID: 37794186)	54219	European (U.K.)	Continuous	2025-05-06	Q9NQI0	DDX4	Inflammation_II
OID30534	Beta-defensin 103	Sun et al., 2023 (PMID: 37794186)	54219	European (U.K.)	Continuous	2025-05-06	P81534	DEFB103A_DEFB103B	Inflammation_II
OID30050	DENN domain-containing protein 2B	Sun et al., 2023 (PMID: 37794186)	54219	European (U.K.)	Continuous	2025-05-06	P78524	DENND2B	Cardiometabolic_II
OID30493	Density-regulated protein	Sun et al., 2023 (PMID: 37794186)	54219	European (U.K.)	Continuous	2025-05-06	O43583	DENR	Inflammation_II
OID30546	Diacylglycerol kinase alpha	Sun et al., 2023 (PMID: 37794186)	54219	European (U.K.)	Continuous	2025-05-06	P23743	DGKA	Inflammation_II
OID30137	Dihydroorotate dehydrogenase	Sun et al., 2023 (PMID: 37794186)	54219	European (U.K.)	Continuous	2025-05-06	Q02127	DHODH	Cardiometabolic_II
OID30582	Divergent protein kinase domain 2B	Sun et al., 2023 (PMID: 37794186)	54219	European (U.K.)	Continuous	2025-05-06	Q9H7Y0	DIPK2B	Inflammation_II
OID30255	Delta-like protein 4	Sun et al., 2023 (PMID: 37794186)	54219	European (U.K.)	Continuous	2025-05-06	Q9NR61	DLL4	Cardiometabolic_II
OID30223	Dystrophin	Sun et al., 2023 (PMID: 37794186)	54219	European (U.K.)	Continuous	2025-05-06	P11532	DMD	Cardiometabolic_II
OID30213	Dentin matrix acidic phosphoprotein 1	Sun et al., 2023 (PMID: 37794186)	54219	European (U.K.)	Continuous	2025-05-06	Q13316	DMP1	Cardiometabolic_II
OID30661	DnaJ homolog subfamily B member 2	Sun et al., 2023 (PMID: 37794186)	54219	European (U.K.)	Continuous	2025-05-06	P25686	DNAJB2	Inflammation_II
OID30613	DnaJ homolog subfamily B member 6	Sun et al., 2023 (PMID: 37794186)	54219	European (U.K.)	Continuous	2025-05-06	O75190	DNAJB6	Inflammation_II
OID30247	Putative tyrosine-protein phosphatase auxilin	Sun et al., 2023 (PMID: 37794186)	54219	European (U.K.)	Continuous	2025-05-06	O75061	DNAJC6	Cardiometabolic_II
OID30580	D-aminoacyl-tRNA deacylase 1	Sun et al., 2023 (PMID: 37794186)	54219	European (U.K.)	Continuous	2025-05-06	Q8TEA8	DTD1	Inflammation_II
OID30308	Thymidylate kinase	Sun et al., 2023 (PMID: 37794186)	54219	European (U.K.)	Continuous	2025-05-06	P23919	DTYMK	Cardiometabolic_II
OID30293	Enoyl-CoA hydratase domain-containing protein 3, mitochondrial	Sun et al., 2023 (PMID: 37794186)	54219	European (U.K.)	Continuous	2025-05-06	Q96DC8	ECHDC3	Cardiometabolic_II
OID30239	Enoyl-CoA hydratase, mitochondrial	Sun et al., 2023 (PMID: 37794186)	54219	European (U.K.)	Continuous	2025-05-06	P30084	ECHS1	Cardiometabolic_II
OID30142	Enoyl-CoA delta isomerase 2	Sun et al., 2023 (PMID: 37794186)	54219	European (U.K.)	Continuous	2025-05-06	O75521	ECI2	Cardiometabolic_II
OID30736	Extracellular matrix protein 1	Sun et al., 2023 (PMID: 37794186)	54219	European (U.K.)	Continuous	2025-05-06	Q16610	ECM1	Inflammation_II
OID30136	ER degradation-enhancing alpha-mannosidase-like protein 2	Sun et al., 2023 (PMID: 37794186)	54219	European (U.K.)	Continuous	2025-05-06	Q9BV94	EDEM2	Cardiometabolic_II
OID30224	Endothelin-1	Sun et al., 2023 (PMID: 37794186)	54219	European (U.K.)	Continuous	2025-05-06	P05305	EDN1	Cardiometabolic_II
OID30421	Endothelin receptor type B	Sun et al., 2023 (PMID: 37794186)	54219	European (U.K.)	Continuous	2025-05-06	P24530	EDNRB	Inflammation_II
OID30335	Elongation factor 1-delta	Sun et al., 2023 (PMID: 37794186)	54219	European (U.K.)	Continuous	2025-05-06	P29692	EEF1D	Cardiometabolic_II
OID30302	EH domain-binding protein 1	Sun et al., 2023 (PMID: 37794186)	54219	European (U.K.)	Continuous	2025-05-06	Q8NDI1	EHBP1	Cardiometabolic_II
OID30229	EH domain-containing protein 3	Sun et al., 2023 (PMID: 37794186)	54219	European (U.K.)	Continuous	2025-05-06	Q9NZN3	EHD3	Cardiometabolic_II
OID30060	Eukaryotic translation initiation factor 2-alpha kinase 3	Sun et al., 2023 (PMID: 37794186)	54219	European (U.K.)	Continuous	2025-05-06	Q9NZJ5	EIF2AK3	Cardiometabolic_II
OID30270	Eukaryotic translation initiation factor 2 subunit 2	Sun et al., 2023 (PMID: 37794186)	54219	European (U.K.)	Continuous	2025-05-06	P20042	EIF2S2	Cardiometabolic_II
OID30557	Eukaryotic translation initiation factor 4E	Sun et al., 2023 (PMID: 37794186)	54219	European (U.K.)	Continuous	2025-05-06	P06730	EIF4E	Inflammation_II
OID30156	Eukaryotic translation initiation factor 5	Sun et al., 2023 (PMID: 37794186)	54219	European (U.K.)	Continuous	2025-05-06	P55010	EIF5	Cardiometabolic_II
OID30301	Elastin	Sun et al., 2023 (PMID: 37794186)	54219	European (U.K.)	Continuous	2025-05-06	P15502	ELN	Cardiometabolic_II
OID30127	Elongin-B	Sun et al., 2023 (PMID: 37794186)	54219	European (U.K.)	Continuous	2025-05-06	Q15370	ELOB	Cardiometabolic_II
OID30209	Beta-enolase	Sun et al., 2023 (PMID: 37794186)	54219	European (U.K.)	Continuous	2025-05-06	P13929	ENO3	Cardiometabolic_II
OID30152	Ecto-NOX disulfide-thiol exchanger 2	Sun et al., 2023 (PMID: 37794186)	54219	European (U.K.)	Continuous	2025-05-06	Q16206	ENOX2	Cardiometabolic_II
OID30135	Glutamyl aminopeptidase	Sun et al., 2023 (PMID: 37794186)	54219	European (U.K.)	Continuous	2025-05-06	Q07075	ENPEP	Cardiometabolic_II
OID30273	Glycerophosphocholine cholinephosphodiesterase ENPP6	Sun et al., 2023 (PMID: 37794186)	54219	European (U.K.)	Continuous	2025-05-06	Q6UWR7	ENPP6	Cardiometabolic_II
OID30231	Endosome-associated-trafficking regulator 1	Sun et al., 2023 (PMID: 37794186)	54219	European (U.K.)	Continuous	2025-05-06	Q96C92	ENTR1	Cardiometabolic_II
OID30438	Histone acetyltransferase p300	Sun et al., 2023 (PMID: 37794186)	54219	European (U.K.)	Continuous	2025-05-06	Q09472	EP300	Inflammation_II
OID30622	Ephrin type-A receptor 4	Sun et al., 2023 (PMID: 37794186)	54219	European (U.K.)	Continuous	2025-05-06	P54764	EPHA4	Inflammation_II
OID30250	Epiplakin	Sun et al., 2023 (PMID: 37794186)	54219	European (U.K.)	Continuous	2025-05-06	P58107	EPPK1	Cardiometabolic_II
OID30539	Erythroid membrane-associated protein	Sun et al., 2023 (PMID: 37794186)	54219	European (U.K.)	Continuous	2025-05-06	Q96PL5	ERMAP	Inflammation_II
OID30578	Endoplasmic reticulum resident protein 29	Sun et al., 2023 (PMID: 37794186)	54219	European (U.K.)	Continuous	2025-05-06	P30040	ERP29	Inflammation_II
OID30094	Endogenous retrovirus group V member 1 Env polyprotein	Sun et al., 2023 (PMID: 37794186)	54219	European (U.K.)	Continuous	2025-05-06	B6SEH8	ERVV-1	Cardiometabolic_II
OID30434	Estrogen receptor	Sun et al., 2023 (PMID: 37794186)	54219	European (U.K.)	Continuous	2025-05-06	P03372	ESR1	Inflammation_II
OID30519	Ecotropic viral integration site 5 protein homolog	Sun et al., 2023 (PMID: 37794186)	54219	European (U.K.)	Continuous	2025-05-06	O60447	EVI5	Inflammation_II
OID30083	Exosome component 10	Sun et al., 2023 (PMID: 37794186)	54219	European (U.K.)	Continuous	2025-05-06	Q01780	EXOSC10	Cardiometabolic_II
OID30114	Exostosin-like 1	Sun et al., 2023 (PMID: 37794186)	54219	European (U.K.)	Continuous	2025-05-06	Q92935	EXTL1	Cardiometabolic_II
OID30684	Coagulation factor X	Sun et al., 2023 (PMID: 37794186)	54219	European (U.K.)	Continuous	2025-05-06	P00742	F10	Inflammation_II
OID30773	Coagulation factor XI	Sun et al., 2023 (PMID: 37794186)	54219	European (U.K.)	Continuous	2025-05-06	P03951	F11	Inflammation_II
OID30739	Coagulation factor XII	Sun et al., 2023 (PMID: 37794186)	54219	European (U.K.)	Continuous	2025-05-06	P00748	F12	Inflammation_II
OID30781	Coagulation factor XIII B chain	Sun et al., 2023 (PMID: 37794186)	54219	European (U.K.)	Continuous	2025-05-06	P05160	F13B	Inflammation_II
OID30723	Prothrombin	Sun et al., 2023 (PMID: 37794186)	54219	European (U.K.)	Continuous	2025-05-06	P00734	F2	Inflammation_II
OID30351	Fatty acid-binding protein, heart	Sun et al., 2023 (PMID: 37794186)	54219	European (U.K.)	Continuous	2025-05-06	P05413	FABP3	Cardiometabolic_II
OID30248	Cotranscriptional regulator FAM172A	Sun et al., 2023 (PMID: 37794186)	54219	European (U.K.)	Continuous	2025-05-06	Q8WUF8	FAM172A	Cardiometabolic_II
OID30348	Pseudokinase FAM20A	Sun et al., 2023 (PMID: 37794186)	54219	European (U.K.)	Continuous	2025-05-06	Q96MK3	FAM20A	Cardiometabolic_II
OID30378	Fibulin-2	Sun et al., 2023 (PMID: 37794186)	54219	European (U.K.)	Continuous	2025-05-06	P98095	FBLN2	Cardiometabolic_II
OID30332	High affinity immunoglobulin alpha and immunoglobulin mu Fc receptor	Sun et al., 2023 (PMID: 37794186)	54219	European (U.K.)	Continuous	2025-05-06	Q8WWV6	FCAMR	Cardiometabolic_II
OID30690	Ficolin-1	Sun et al., 2023 (PMID: 37794186)	54219	European (U.K.)	Continuous	2025-05-06	O00602	FCN1	Inflammation_II
OID30078	Adrenodoxin, mitochondrial	Sun et al., 2023 (PMID: 37794186)	54219	European (U.K.)	Continuous	2025-05-06	P10109	FDX1	Cardiometabolic_II
OID30147	Ferredoxin-2, mitochondrial	Sun et al., 2023 (PMID: 37794186)	54219	European (U.K.)	Continuous	2025-05-06	Q6P4F2	FDX2	Cardiometabolic_II
OID30788	Fibrinogen alpha chain	Sun et al., 2023 (PMID: 37794186)	54219	European (U.K.)	Continuous	2025-05-06	P02671	FGA	Inflammation_II
OID30454	Fibroblast growth factor 12	Sun et al., 2023 (PMID: 37794186)	54219	European (U.K.)	Continuous	2025-05-06	P61328	FGF12	Inflammation_II
OID30535	Fibroblast growth factor 16	Sun et al., 2023 (PMID: 37794186)	54219	European (U.K.)	Continuous	2025-05-06	O43320	FGF16	Inflammation_II
OID30459	Fibroblast growth factor 20	Sun et al., 2023 (PMID: 37794186)	54219	European (U.K.)	Continuous	2025-05-06	Q9NP95	FGF20	Inflammation_II
OID30544	Fibroblast growth factor 3	Sun et al., 2023 (PMID: 37794186)	54219	European (U.K.)	Continuous	2025-05-06	P11487	FGF3	Inflammation_II
OID30443	Fibroblast growth factor 6	Sun et al., 2023 (PMID: 37794186)	54219	European (U.K.)	Continuous	2025-05-06	P10767	FGF6	Inflammation_II
OID30395	Fibroblast growth factor-binding protein 2	Sun et al., 2023 (PMID: 37794186)	54219	European (U.K.)	Continuous	2025-05-06	Q9BYJ0	FGFBP2	Cardiometabolic_II
OID30646	Fibroblast growth factor receptor 4	Sun et al., 2023 (PMID: 37794186)	54219	European (U.K.)	Continuous	2025-05-06	P22455	FGFR4	Inflammation_II
OID30702	Fibrinogen-like protein 1	Sun et al., 2023 (PMID: 37794186)	54219	European (U.K.)	Continuous	2025-05-06	Q08830	FGL1	Inflammation_II
OID30187	FHF complex subunit HOOK interacting protein 2A	Sun et al., 2023 (PMID: 37794186)	54219	European (U.K.)	Continuous	2025-05-06	Q5W0V3	FHIP2A	Cardiometabolic_II
OID30787	Fibronectin	Sun et al., 2023 (PMID: 37794186)	54219	European (U.K.)	Continuous	2025-05-06	P02751	FN1	Inflammation_II
OID30430	Glutamate carboxypeptidase 2	Sun et al., 2023 (PMID: 37794186)	54219	European (U.K.)	Continuous	2025-05-06	Q04609	FOLH1	Inflammation_II
OID30445	Forkhead box protein J3	Sun et al., 2023 (PMID: 37794186)	54219	European (U.K.)	Continuous	2025-05-06	Q9UPW0	FOXJ3	Inflammation_II
OID30155	FERM domain-containing protein 4B	Sun et al., 2023 (PMID: 37794186)	54219	European (U.K.)	Continuous	2025-05-06	Q9Y2L6	FRMD4B	Cardiometabolic_II
OID30233	Follitropin subunit beta	Sun et al., 2023 (PMID: 37794186)	54219	European (U.K.)	Continuous	2025-05-06	P01225	FSHB	Cardiometabolic_II
OID30254	Follistatin-related protein 1	Sun et al., 2023 (PMID: 37794186)	54219	European (U.K.)	Continuous	2025-05-06	Q12841	FSTL1	Cardiometabolic_II
OID30626	Fucose mutarotase	Sun et al., 2023 (PMID: 37794186)	54219	European (U.K.)	Continuous	2025-05-06	A2VDF0	FUOM	Inflammation_II
OID30449	Glutamate decarboxylase 2	Sun et al., 2023 (PMID: 37794186)	54219	European (U.K.)	Continuous	2025-05-06	Q05329	GAD2	Inflammation_II
OID30237	Growth arrest and DNA damage-inducible proteins-interacting protein 1	Sun et al., 2023 (PMID: 37794186)	54219	European (U.K.)	Continuous	2025-05-06	Q8TAE8	GADD45GIP1	Cardiometabolic_II
OID30295	Polypeptide N-acetylgalactosaminyltransferase 5	Sun et al., 2023 (PMID: 37794186)	54219	European (U.K.)	Continuous	2025-05-06	Q7Z7M9	GALNT5	Cardiometabolic_II
OID30133	Guanidinoacetate N-methyltransferase	Sun et al., 2023 (PMID: 37794186)	54219	European (U.K.)	Continuous	2025-05-06	Q14353	GAMT	Cardiometabolic_II
OID30600	Glyceraldehyde-3-phosphate dehydrogenase	Sun et al., 2023 (PMID: 37794186)	54219	European (U.K.)	Continuous	2025-05-06	P04406	GAPDH	Inflammation_II
OID30109	Golgi-associated kinase 1A	Sun et al., 2023 (PMID: 37794186)	54219	European (U.K.)	Continuous	2025-05-06	Q9UFP1	GASK1A	Cardiometabolic_II
OID30253	Glutamine amidotransferase-like class 1 domain-containing protein 3B, mitochondrial	Sun et al., 2023 (PMID: 37794186)	54219	European (U.K.)	Continuous	2025-05-06	P0DPI2	GATD3	Cardiometabolic_II
OID30139	Guanylate-binding protein 6	Sun et al., 2023 (PMID: 37794186)	54219	European (U.K.)	Continuous	2025-05-06	Q6ZN66	GBP6	Cardiometabolic_II
OID30780	Vitamin D-binding protein	Sun et al., 2023 (PMID: 37794186)	54219	European (U.K.)	Continuous	2025-05-06	P02774	GC	Inflammation_II
OID30631	GTP cyclohydrolase 1 feedback regulatory protein	Sun et al., 2023 (PMID: 37794186)	54219	European (U.K.)	Continuous	2025-05-06	P30047	GCHFR	Inflammation_II
OID30059	Glutamate--cysteine ligase regulatory subunit	Sun et al., 2023 (PMID: 37794186)	54219	European (U.K.)	Continuous	2025-05-06	P48507	GCLM	Cardiometabolic_II
OID30303	ATPase GET3	Sun et al., 2023 (PMID: 37794186)	54219	European (U.K.)	Continuous	2025-05-06	O43681	GET3	Cardiometabolic_II
OID30290	Gamma-glutamylaminecyclotransferase	Sun et al., 2023 (PMID: 37794186)	54219	European (U.K.)	Continuous	2025-05-06	Q9BVM4	GGACT	Cardiometabolic_II
OID30304	Gamma-glutamylcyclotransferase	Sun et al., 2023 (PMID: 37794186)	54219	European (U.K.)	Continuous	2025-05-06	O75223	GGCT	Cardiometabolic_II
OID30574	Growth hormone receptor	Sun et al., 2023 (PMID: 37794186)	54219	European (U.K.)	Continuous	2025-05-06	P10912	GHR	Inflammation_II
OID30639	GTPase IMAP family member 7	Sun et al., 2023 (PMID: 37794186)	54219	European (U.K.)	Continuous	2025-05-06	Q8NHV1	GIMAP7	Inflammation_II
OID30288	Gastric inhibitory polypeptide	Sun et al., 2023 (PMID: 37794186)	54219	European (U.K.)	Continuous	2025-05-06	P09681	GIP	Cardiometabolic_II
OID30542	Gastric inhibitory polypeptide receptor	Sun et al., 2023 (PMID: 37794186)	54219	European (U.K.)	Continuous	2025-05-06	P48546	GIPR	Inflammation_II
OID30533	ARF GTPase-activating protein GIT1	Sun et al., 2023 (PMID: 37794186)	54219	European (U.K.)	Continuous	2025-05-06	Q9Y2X7	GIT1	Inflammation_II
OID30594	Alpha-galactosidase A	Sun et al., 2023 (PMID: 37794186)	54219	European (U.K.)	Continuous	2025-05-06	P06280	GLA	Inflammation_II
OID30429	Zinc finger protein GLI2	Sun et al., 2023 (PMID: 37794186)	54219	European (U.K.)	Continuous	2025-05-06	P10070	GLI2	Inflammation_II
OID30663	Glutaredoxin-related protein 5, mitochondrial	Sun et al., 2023 (PMID: 37794186)	54219	European (U.K.)	Continuous	2025-05-06	Q86SX6	GLRX5	Inflammation_II
OID30413	Ganglioside GM2 activator	Sun et al., 2023 (PMID: 37794186)	54219	European (U.K.)	Continuous	2025-05-06	P17900	GM2A	Cardiometabolic_II
OID30340	Glia maturation factor gamma	Sun et al., 2023 (PMID: 37794186)	54219	European (U.K.)	Continuous	2025-05-06	O60234	GMFG	Cardiometabolic_II
OID30623	GMP reductase 2	Sun et al., 2023 (PMID: 37794186)	54219	European (U.K.)	Continuous	2025-05-06	Q9P2T1	GMPR2	Inflammation_II
OID30197	Glucosamine-6-phosphate isomerase 1	Sun et al., 2023 (PMID: 37794186)	54219	European (U.K.)	Continuous	2025-05-06	P46926	GNPDA1	Cardiometabolic_II
OID30597	Glucosamine-6-phosphate isomerase 2	Sun et al., 2023 (PMID: 37794186)	54219	European (U.K.)	Continuous	2025-05-06	Q8TDQ7	GNPDA2	Inflammation_II
OID30417	Aspartate aminotransferase, cytoplasmic	Sun et al., 2023 (PMID: 37794186)	54219	European (U.K.)	Continuous	2025-05-06	P17174	GOT1	Cardiometabolic_II
OID30174	Platelet glycoprotein Ib beta chain	Sun et al., 2023 (PMID: 37794186)	54219	European (U.K.)	Continuous	2025-05-06	P13224	GP1BB	Cardiometabolic_II
OID30611	Platelet glycoprotein V	Sun et al., 2023 (PMID: 37794186)	54219	European (U.K.)	Continuous	2025-05-06	P40197	GP5	Inflammation_II
OID30680	Glucose-6-phosphate isomerase	Sun et al., 2023 (PMID: 37794186)	54219	European (U.K.)	Continuous	2025-05-06	P06744	GPI	Inflammation_II
OID30289	Glyoxylate reductase/hydroxypyruvate reductase	Sun et al., 2023 (PMID: 37794186)	54219	European (U.K.)	Continuous	2025-05-06	Q9UBQ7	GRHPR	Cardiometabolic_II
OID30264	Gastrin-releasing peptide	Sun et al., 2023 (PMID: 37794186)	54219	European (U.K.)	Continuous	2025-05-06	P07492	GRP	Cardiometabolic_II
OID30714	Gelsolin	Sun et al., 2023 (PMID: 37794186)	54219	European (U.K.)	Continuous	2025-05-06	P06396	GSN	Inflammation_II
OID30700	Glutathione reductase, mitochondrial	Sun et al., 2023 (PMID: 37794186)	54219	European (U.K.)	Continuous	2025-05-06	P00390	GSR	Inflammation_II
OID30164	Glutathione S-transferase Mu 4	Sun et al., 2023 (PMID: 37794186)	54219	European (U.K.)	Continuous	2025-05-06	Q03013	GSTM4	Cardiometabolic_II
OID30148	Guanylate kinase	Sun et al., 2023 (PMID: 37794186)	54219	European (U.K.)	Continuous	2025-05-06	Q16774	GUK1	Cardiometabolic_II
OID30132	Hydroxyacyl-coenzyme A dehydrogenase, mitochondrial	Sun et al., 2023 (PMID: 37794186)	54219	European (U.K.)	Continuous	2025-05-06	Q16836	HADH	Cardiometabolic_II
OID30307	Hemoglobin subunit zeta	Sun et al., 2023 (PMID: 37794186)	54219	European (U.K.)	Continuous	2025-05-06	P02008	HBZ	Cardiometabolic_II
OID30088	Protein PBMUCL2	Sun et al., 2023 (PMID: 37794186)	54219	European (U.K.)	Continuous	2025-05-06	E2RYF7	HCG22	Cardiometabolic_II
OID30436	Histone deacetylase 8	Sun et al., 2023 (PMID: 37794186)	54219	European (U.K.)	Continuous	2025-05-06	Q9BY41	HDAC8	Inflammation_II
OID30579	Protein HEG homolog 1	Sun et al., 2023 (PMID: 37794186)	54219	European (U.K.)	Continuous	2025-05-06	Q9ULI3	HEG1	Inflammation_II
OID30337	Hephaestin	Sun et al., 2023 (PMID: 37794186)	54219	European (U.K.)	Continuous	2025-05-06	Q9BQS7	HEPH	Cardiometabolic_II
OID30718	Hepatocyte growth factor activator	Sun et al., 2023 (PMID: 37794186)	54219	European (U.K.)	Continuous	2025-05-06	Q04756	HGFAC	Inflammation_II
OID30425	Hypoxia-inducible factor 1-alpha	Sun et al., 2023 (PMID: 37794186)	54219	European (U.K.)	Continuous	2025-05-06	Q16665	HIF1A	Inflammation_II
OID30071	Huntingtin-interacting protein 1	Sun et al., 2023 (PMID: 37794186)	54219	European (U.K.)	Continuous	2025-05-06	O00291	HIP1	Cardiometabolic_II
OID30592	Hemicentin-2	Sun et al., 2023 (PMID: 37794186)	54219	European (U.K.)	Continuous	2025-05-06	Q8NDA2	HMCN2	Inflammation_II
OID30214	Hydroxymethylglutaryl-CoA lyase, mitochondrial	Sun et al., 2023 (PMID: 37794186)	54219	European (U.K.)	Continuous	2025-05-06	P35914	HMGCL	Cardiometabolic_II
OID30157	Hydroxymethylglutaryl-CoA synthase, cytoplasmic	Sun et al., 2023 (PMID: 37794186)	54219	European (U.K.)	Continuous	2025-05-06	Q01581	HMGCS1	Cardiometabolic_II
OID30409	Heparanase	Sun et al., 2023 (PMID: 37794186)	54219	European (U.K.)	Continuous	2025-05-06	Q9Y251	HPSE	Cardiometabolic_II
OID30211	Sarcoplasmic reticulum histidine-rich calcium-binding protein	Sun et al., 2023 (PMID: 37794186)	54219	European (U.K.)	Continuous	2025-05-06	P23327	HRC	Cardiometabolic_II
OID30770	Histidine-rich glycoprotein	Sun et al., 2023 (PMID: 37794186)	54219	European (U.K.)	Continuous	2025-05-06	P04196	HRG	Inflammation_II
OID30243	HCLS1-binding protein 3	Sun et al., 2023 (PMID: 37794186)	54219	European (U.K.)	Continuous	2025-05-06	Q53T59	HS1BP3	Cardiometabolic_II
OID30481	Heparan-sulfate 6-O-sulfotransferase 2	Sun et al., 2023 (PMID: 37794186)	54219	European (U.K.)	Continuous	2025-05-06	Q96MM7	HS6ST2	Inflammation_II
OID30232	Heat shock factor-binding protein 1	Sun et al., 2023 (PMID: 37794186)	54219	European (U.K.)	Continuous	2025-05-06	O75506	HSBP1	Cardiometabolic_II
OID30145	Testosterone 17-beta-dehydrogenase 3	Sun et al., 2023 (PMID: 37794186)	54219	European (U.K.)	Continuous	2025-05-06	P37058	HSD17B3	Cardiometabolic_II
OID30256	Hydroxysteroid dehydrogenase-like protein 2	Sun et al., 2023 (PMID: 37794186)	54219	European (U.K.)	Continuous	2025-05-06	Q6YN16	HSDL2	Cardiometabolic_II
OID30230	Indoleamine 2,3-dioxygenase 1	Sun et al., 2023 (PMID: 37794186)	54219	European (U.K.)	Continuous	2025-05-06	P14902	IDO1	Cardiometabolic_II
OID30563	Indoleamine 2,3-dioxygenase 1	Sun et al., 2023 (PMID: 37794186)	54219	European (U.K.)	Continuous	2025-05-06	P14902	IDO1	Inflammation_II
OID30129	Interferon omega-1	Sun et al., 2023 (PMID: 37794186)	54219	European (U.K.)	Continuous	2025-05-06	P05000	IFNW1	Cardiometabolic_II
OID30402	Immunoglobulin superfamily DCC subclass member 4	Sun et al., 2023 (PMID: 37794186)	54219	European (U.K.)	Continuous	2025-05-06	Q8TDY8	IGDCC4	Cardiometabolic_II
OID30112	Insulin-like growth factor 2 mRNA-binding protein 3	Sun et al., 2023 (PMID: 37794186)	54219	European (U.K.)	Continuous	2025-05-06	O00425	IGF2BP3	Cardiometabolic_II
OID30500	Insulin growth factor-like family member 4	Sun et al., 2023 (PMID: 37794186)	54219	European (U.K.)	Continuous	2025-05-06	Q6B9Z1	IGFL4	Inflammation_II
OID30123	DNA-binding protein SMUBP-2	Sun et al., 2023 (PMID: 37794186)	54219	European (U.K.)	Continuous	2025-05-06	P38935	IGHMBP2	Cardiometabolic_II
OID30740	Immunoglobulin lambda constant 2	Sun et al., 2023 (PMID: 37794186)	54219	European (U.K.)	Continuous	2025-05-06	P0DOY2	IGLC2	Inflammation_II
OID30210	Immunoglobulin superfamily member 21	Sun et al., 2023 (PMID: 37794186)	54219	European (U.K.)	Continuous	2025-05-06	Q96ID5	IGSF21	Cardiometabolic_II
OID30330	Protein turtle homolog A	Sun et al., 2023 (PMID: 37794186)	54219	European (U.K.)	Continuous	2025-05-06	Q9P2J2	IGSF9	Cardiometabolic_II
OID30422	Interleukin-12 receptor subunit beta-2	Sun et al., 2023 (PMID: 37794186)	54219	European (U.K.)	Continuous	2025-05-06	Q99665	IL12RB2	Inflammation_II
OID30461	Interleukin-20 receptor subunit beta	Sun et al., 2023 (PMID: 37794186)	54219	European (U.K.)	Continuous	2025-05-06	Q6UXL0	IL20RB	Inflammation_II
OID30441	Interleukin-21 receptor	Sun et al., 2023 (PMID: 37794186)	54219	European (U.K.)	Continuous	2025-05-06	Q9HBE5	IL21R	Inflammation_II
OID30487	Interleukin-31	Sun et al., 2023 (PMID: 37794186)	54219	European (U.K.)	Continuous	2025-05-06	Q6EBC2	IL31	Inflammation_II
OID30475	Interleukin-31 receptor subunit alpha	Sun et al., 2023 (PMID: 37794186)	54219	European (U.K.)	Continuous	2025-05-06	Q8NI17	IL31RA	Inflammation_II
OID30472	Interleukin-36 alpha	Sun et al., 2023 (PMID: 37794186)	54219	European (U.K.)	Continuous	2025-05-06	Q9UHA7	IL36A	Inflammation_II
OID30551	Interleukin-36 gamma	Sun et al., 2023 (PMID: 37794186)	54219	European (U.K.)	Continuous	2025-05-06	Q9NZH8	IL36G	Inflammation_II
OID30625	Inhibin beta B chain	Sun et al., 2023 (PMID: 37794186)	54219	European (U.K.)	Continuous	2025-05-06	P09529	INHBB	Inflammation_II
OID30259	Phosphatidylinositol 3,4,5-trisphosphate 5-phosphatase 1	Sun et al., 2023 (PMID: 37794186)	54219	European (U.K.)	Continuous	2025-05-06	Q92835	INPP5D	Cardiometabolic_II
OID30566	Insulin receptor	Sun et al., 2023 (PMID: 37794186)	54219	European (U.K.)	Continuous	2025-05-06	P06213	INSR	Inflammation_II
OID30365	Isthmin-2	Sun et al., 2023 (PMID: 37794186)	54219	European (U.K.)	Continuous	2025-05-06	Q6H9L7	ISM2	Cardiometabolic_II
OID30570	Integrin alpha-2	Sun et al., 2023 (PMID: 37794186)	54219	European (U.K.)	Continuous	2025-05-06	P17301	ITGA2	Inflammation_II
OID30537	Integrin alpha-L	Sun et al., 2023 (PMID: 37794186)	54219	European (U.K.)	Continuous	2025-05-06	P20701	ITGAL	Inflammation_II
OID30408	Integrin beta-like protein 1	Sun et al., 2023 (PMID: 37794186)	54219	European (U.K.)	Continuous	2025-05-06	O95965	ITGBL1	Cardiometabolic_II
OID30722	Inter-alpha-trypsin inhibitor heavy chain H1	Sun et al., 2023 (PMID: 37794186)	54219	European (U.K.)	Continuous	2025-05-06	P19827	ITIH1	Inflammation_II
OID30762	Inter-alpha-trypsin inhibitor heavy chain H4	Sun et al., 2023 (PMID: 37794186)	54219	European (U.K.)	Continuous	2025-05-06	Q14624	ITIH4	Inflammation_II
OID30082	Inosine triphosphate pyrophosphatase	Sun et al., 2023 (PMID: 37794186)	54219	European (U.K.)	Continuous	2025-05-06	Q9BY32	ITPA	Cardiometabolic_II
OID30216	Inositol 1,4,5-trisphosphate receptor type 1	Sun et al., 2023 (PMID: 37794186)	54219	European (U.K.)	Continuous	2025-05-06	Q14643	ITPR1	Cardiometabolic_II
OID30586	Junctional adhesion molecule C	Sun et al., 2023 (PMID: 37794186)	54219	European (U.K.)	Continuous	2025-05-06	Q9BX67	JAM3	Inflammation_II
OID30426	Lysine-specific demethylase 3A	Sun et al., 2023 (PMID: 37794186)	54219	European (U.K.)	Continuous	2025-05-06	Q9Y4C1	KDM3A	Inflammation_II
OID30241	Ketohexokinase	Sun et al., 2023 (PMID: 37794186)	54219	European (U.K.)	Continuous	2025-05-06	P50053	KHK	Cardiometabolic_II
OID30163	Kinesin-like protein KIF1C	Sun et al., 2023 (PMID: 37794186)	54219	European (U.K.)	Continuous	2025-05-06	O43896	KIF1C	Cardiometabolic_II
OID30175	Kinesin-like protein KIF22	Sun et al., 2023 (PMID: 37794186)	54219	European (U.K.)	Continuous	2025-05-06	Q14807	KIF22	Cardiometabolic_II
OID30364	Prostate-specific antigen	Sun et al., 2023 (PMID: 37794186)	54219	European (U.K.)	Continuous	2025-05-06	P07288	KLK3	Cardiometabolic_II
OID30652	Kallikrein-7	Sun et al., 2023 (PMID: 37794186)	54219	European (U.K.)	Continuous	2025-05-06	P49862	KLK7	Inflammation_II
OID30760	Plasma kallikrein	Sun et al., 2023 (PMID: 37794186)	54219	European (U.K.)	Continuous	2025-05-06	P03952	KLKB1	Inflammation_II
OID30464	Killer cell lectin-like receptor subfamily F member 1	Sun et al., 2023 (PMID: 37794186)	54219	European (U.K.)	Continuous	2025-05-06	Q9NZS2	KLRF1	Inflammation_II
OID30092	Keratin, type I cytoskeletal 17	Sun et al., 2023 (PMID: 37794186)	54219	European (U.K.)	Continuous	2025-05-06	Q04695	KRT17	Cardiometabolic_II
OID30169	Keratin, type II cytoskeletal 6C	Sun et al., 2023 (PMID: 37794186)	54219	European (U.K.)	Continuous	2025-05-06	P48668	KRT6C	Cardiometabolic_II
OID30314	Trans-3-hydroxy-L-proline dehydratase	Sun et al., 2023 (PMID: 37794186)	54219	European (U.K.)	Continuous	2025-05-06	Q96EM0	L3HYPDH	Cardiometabolic_II
OID30057	Laminin subunit alpha-1	Sun et al., 2023 (PMID: 37794186)	54219	European (U.K.)	Continuous	2025-05-06	P25391	LAMA1	Cardiometabolic_II
OID30280	Laminin subunit beta-1	Sun et al., 2023 (PMID: 37794186)	54219	European (U.K.)	Continuous	2025-05-06	P07942	LAMB1	Cardiometabolic_II
OID30416	Lysosome-associated membrane glycoprotein 1	Sun et al., 2023 (PMID: 37794186)	54219	European (U.K.)	Continuous	2025-05-06	P11279	LAMP1	Cardiometabolic_II
OID30523	Serine/threonine-protein kinase LATS1	Sun et al., 2023 (PMID: 37794186)	54219	European (U.K.)	Continuous	2025-05-06	O95835	LATS1	Inflammation_II
OID30677	Phosphatidylcholine-sterol acyltransferase	Sun et al., 2023 (PMID: 37794186)	54219	European (U.K.)	Continuous	2025-05-06	P04180	LCAT	Inflammation_II
OID30367	Plastin-2	Sun et al., 2023 (PMID: 37794186)	54219	European (U.K.)	Continuous	2025-05-06	P13796	LCP1	Cardiometabolic_II
OID30320	Leukocyte cell-derived chemotaxin-2	Sun et al., 2023 (PMID: 37794186)	54219	European (U.K.)	Continuous	2025-05-06	O14960	LECT2	Cardiometabolic_II
OID30608	Protein LEG1 homolog	Sun et al., 2023 (PMID: 37794186)	54219	European (U.K.)	Continuous	2025-05-06	Q6P5S2	LEG1	Inflammation_II
OID30765	Galectin-3-binding protein	Sun et al., 2023 (PMID: 37794186)	54219	European (U.K.)	Continuous	2025-05-06	Q08380	LGALS3BP	Inflammation_II
OID30376	Leukocyte immunoglobulin-like receptor subfamily A member 3	Sun et al., 2023 (PMID: 37794186)	54219	European (U.K.)	Continuous	2025-05-06	Q8N6C8	LILRA3	Cardiometabolic_II
OID30162	Leukocyte immunoglobulin-like receptor subfamily A member 4	Sun et al., 2023 (PMID: 37794186)	54219	European (U.K.)	Continuous	2025-05-06	P59901	LILRA4	Cardiometabolic_II
OID30346	Leukocyte immunoglobulin-like receptor subfamily A member 6	Sun et al., 2023 (PMID: 37794186)	54219	European (U.K.)	Continuous	2025-05-06	Q6PI73	LILRA6	Cardiometabolic_II
OID30266	Gastric triacylglycerol lipase	Sun et al., 2023 (PMID: 37794186)	54219	European (U.K.)	Continuous	2025-05-06	P07098	LIPF	Cardiometabolic_II
OID30212	Leiomodin-1	Sun et al., 2023 (PMID: 37794186)	54219	European (U.K.)	Continuous	2025-05-06	P29536	LMOD1	Cardiometabolic_II
OID30547	Leiomodin-1	Sun et al., 2023 (PMID: 37794186)	54219	European (U.K.)	Continuous	2025-05-06	P29536	LMOD1	Inflammation_II
OID30219	Lon protease homolog, mitochondrial	Sun et al., 2023 (PMID: 37794186)	54219	European (U.K.)	Continuous	2025-05-06	P36776	LONP1	Cardiometabolic_II
OID30747	Apolipoprotein(a)	Sun et al., 2023 (PMID: 37794186)	54219	European (U.K.)	Continuous	2025-05-06	P08519	LPA	Inflammation_II
OID30190	Lipoma-preferred partner	Sun et al., 2023 (PMID: 37794186)	54219	European (U.K.)	Continuous	2025-05-06	Q93052	LPP	Cardiometabolic_II
OID30191	Leucine-rich repeat and calponin homology domain-containing protein 4	Sun et al., 2023 (PMID: 37794186)	54219	European (U.K.)	Continuous	2025-05-06	O75427	LRCH4	Cardiometabolic_II
OID30751	Leucine-rich alpha-2-glycoprotein	Sun et al., 2023 (PMID: 37794186)	54219	European (U.K.)	Continuous	2025-05-06	P02750	LRG1	Inflammation_II
OID30450	Leucine-rich repeats and immunoglobulin-like domains protein 3	Sun et al., 2023 (PMID: 37794186)	54219	European (U.K.)	Continuous	2025-05-06	Q6UXM1	LRIG3	Inflammation_II
OID30361	Leucine-rich repeat-containing protein 59	Sun et al., 2023 (PMID: 37794186)	54219	European (U.K.)	Continuous	2025-05-06	Q96AG4	LRRC59	Cardiometabolic_II
OID30728	Lymphatic vessel endothelial hyaluronic acid receptor 1	Sun et al., 2023 (PMID: 37794186)	54219	European (U.K.)	Continuous	2025-05-06	Q9Y5Y7	LYVE1	Inflammation_II
OID30637	Leucine zipper transcription factor-like protein 1	Sun et al., 2023 (PMID: 37794186)	54219	European (U.K.)	Continuous	2025-05-06	Q9NQ48	LZTFL1	Inflammation_II
OID30208	Cation-dependent mannose-6-phosphate receptor	Sun et al., 2023 (PMID: 37794186)	54219	European (U.K.)	Continuous	2025-05-06	P20645	M6PR	Cardiometabolic_II
OID30309	MAM domain-containing protein 2	Sun et al., 2023 (PMID: 37794186)	54219	European (U.K.)	Continuous	2025-05-06	Q7Z304	MAMDC2	Cardiometabolic_II
OID30262	Mannosyl-oligosaccharide 1,2-alpha-mannosidase IB	Sun et al., 2023 (PMID: 37794186)	54219	European (U.K.)	Continuous	2025-05-06	O60476	MAN1A2	Cardiometabolic_II
OID30306	Epididymis-specific alpha-mannosidase	Sun et al., 2023 (PMID: 37794186)	54219	European (U.K.)	Continuous	2025-05-06	Q9Y2E5	MAN2B2	Cardiometabolic_II
OID30141	MANSC domain-containing protein 4	Sun et al., 2023 (PMID: 37794186)	54219	European (U.K.)	Continuous	2025-05-06	A6NHS7	MANSC4	Cardiometabolic_II
OID30074	Microtubule-associated proteins 1A/1B light chain 3 beta 2	Sun et al., 2023 (PMID: 37794186)	54219	European (U.K.)	Continuous	2025-05-06	A6NCE7	MAP1LC3B2	Cardiometabolic_II
OID30658	Methionine--tRNA ligase, cytoplasmic	Sun et al., 2023 (PMID: 37794186)	54219	European (U.K.)	Continuous	2025-05-06	P56192	MARS1	Inflammation_II
OID30759	Mannose-binding protein C	Sun et al., 2023 (PMID: 37794186)	54219	European (U.K.)	Continuous	2025-05-06	P11226	MBL2	Inflammation_II
OID30501	Mast cell-expressed membrane protein 1	Sun et al., 2023 (PMID: 37794186)	54219	European (U.K.)	Continuous	2025-05-06	Q8IX19	MCEMP1	Inflammation_II
OID30669	Malate dehydrogenase, cytoplasmic	Sun et al., 2023 (PMID: 37794186)	54219	European (U.K.)	Continuous	2025-05-06	P40925	MDH1	Inflammation_II
OID30274	Enoyl-[acyl-carrier-protein] reductase, mitochondrial	Sun et al., 2023 (PMID: 37794186)	54219	European (U.K.)	Continuous	2025-05-06	Q9BV79	MECR	Cardiometabolic_II
OID30066	Mediator of RNA polymerase II transcription subunit 21	Sun et al., 2023 (PMID: 37794186)	54219	European (U.K.)	Continuous	2025-05-06	Q13503	MED21	Cardiometabolic_II
OID30099	Multiple epidermal growth factor-like domains protein 11	Sun et al., 2023 (PMID: 37794186)	54219	European (U.K.)	Continuous	2025-05-06	A6BM72	MEGF11	Cardiometabolic_II
OID30347	Melanotransferrin	Sun et al., 2023 (PMID: 37794186)	54219	European (U.K.)	Continuous	2025-05-06	P08582	MELTF	Cardiometabolic_II
OID30595	Protein MENT	Sun et al., 2023 (PMID: 37794186)	54219	European (U.K.)	Continuous	2025-05-06	Q9BUN1	MENT	Inflammation_II
OID30598	Microfibril-associated glycoprotein 4	Sun et al., 2023 (PMID: 37794186)	54219	European (U.K.)	Continuous	2025-05-06	P55083	MFAP4	Inflammation_II
OID30455	Proliferation marker protein Ki-67	Sun et al., 2023 (PMID: 37794186)	54219	European (U.K.)	Continuous	2025-05-06	P46013	MKI67	Inflammation_II
OID30299	Matrix metalloproteinase-15	Sun et al., 2023 (PMID: 37794186)	54219	European (U.K.)	Continuous	2025-05-06	P51511	MMP15	Cardiometabolic_II
OID30159	Methylmalonyl-CoA mutase, mitochondrial	Sun et al., 2023 (PMID: 37794186)	54219	European (U.K.)	Continuous	2025-05-06	P22033	MMUT	Cardiometabolic_II
OID30638	Molybdopterin synthase catalytic subunit	Sun et al., 2023 (PMID: 37794186)	54219	European (U.K.)	Continuous	2025-05-06	O96007	MOCS2	Inflammation_II
OID30694	Macrophage mannose receptor 1	Sun et al., 2023 (PMID: 37794186)	54219	European (U.K.)	Continuous	2025-05-06	P22897	MRC1	Inflammation_II
OID30178	39S ribosomal protein L24, mitochondrial	Sun et al., 2023 (PMID: 37794186)	54219	European (U.K.)	Continuous	2025-05-06	Q96A35	MRPL24	Cardiometabolic_II
OID30489	28S ribosomal protein S16, mitochondrial	Sun et al., 2023 (PMID: 37794186)	54219	European (U.K.)	Continuous	2025-05-06	Q9Y3D3	MRPS16	Inflammation_II
OID30713	Hepatocyte growth factor-like protein	Sun et al., 2023 (PMID: 37794186)	54219	European (U.K.)	Continuous	2025-05-06	P26927	MST1	Inflammation_II
OID30538	Protein LYRIC	Sun et al., 2023 (PMID: 37794186)	54219	European (U.K.)	Continuous	2025-05-06	Q86UE4	MTDH	Inflammation_II
OID30110	Methionine synthase	Sun et al., 2023 (PMID: 37794186)	54219	European (U.K.)	Continuous	2025-05-06	Q99707	MTR	Cardiometabolic_II
OID30377	Mucin-2	Sun et al., 2023 (PMID: 37794186)	54219	European (U.K.)	Continuous	2025-05-06	Q02817	MUC2	Cardiometabolic_II
OID30583	Matrix remodeling-associated protein 8	Sun et al., 2023 (PMID: 37794186)	54219	European (U.K.)	Continuous	2025-05-06	Q9BRK3	MXRA8	Inflammation_II
OID30296	Myosin-binding protein C, slow-type	Sun et al., 2023 (PMID: 37794186)	54219	European (U.K.)	Continuous	2025-05-06	Q00872	MYBPC1	Cardiometabolic_II
OID30199	Myosin-binding protein C, fast-type	Sun et al., 2023 (PMID: 37794186)	54219	European (U.K.)	Continuous	2025-05-06	Q14324	MYBPC2	Cardiometabolic_II
OID30313	Myeloid-derived growth factor	Sun et al., 2023 (PMID: 37794186)	54219	European (U.K.)	Continuous	2025-05-06	Q969H8	MYDGF	Cardiometabolic_II
OID30061	Myosin-4	Sun et al., 2023 (PMID: 37794186)	54219	European (U.K.)	Continuous	2025-05-06	Q9Y623	MYH4	Cardiometabolic_II
OID30382	Myosin-9	Sun et al., 2023 (PMID: 37794186)	54219	European (U.K.)	Continuous	2025-05-06	P35579	MYH9	Cardiometabolic_II
OID30120	Myosin light chain 1/3, skeletal muscle isoform	Sun et al., 2023 (PMID: 37794186)	54219	European (U.K.)	Continuous	2025-05-06	P05976	MYL1	Cardiometabolic_II
OID30251	Myosin light chain 3	Sun et al., 2023 (PMID: 37794186)	54219	European (U.K.)	Continuous	2025-05-06	P08590	MYL3	Cardiometabolic_II
OID30245	Myosin light chain 4	Sun et al., 2023 (PMID: 37794186)	54219	European (U.K.)	Continuous	2025-05-06	P12829	MYL4	Cardiometabolic_II
OID30131	Myomesin-2	Sun et al., 2023 (PMID: 37794186)	54219	European (U.K.)	Continuous	2025-05-06	P54296	MYOM2	Cardiometabolic_II
OID30633	Myomesin-3	Sun et al., 2023 (PMID: 37794186)	54219	European (U.K.)	Continuous	2025-05-06	Q5VTT5	MYOM3	Inflammation_II
OID30188	N-alpha-acetyltransferase 10	Sun et al., 2023 (PMID: 37794186)	54219	European (U.K.)	Continuous	2025-05-06	P41227	NAA10	Cardiometabolic_II
OID30509	Alpha-N-acetylgalactosaminidase	Sun et al., 2023 (PMID: 37794186)	54219	European (U.K.)	Continuous	2025-05-06	P17050	NAGA	Inflammation_II
OID30271	N-acetyl-D-glucosamine kinase	Sun et al., 2023 (PMID: 37794186)	54219	European (U.K.)	Continuous	2025-05-06	Q9UJ70	NAGK	Cardiometabolic_II
OID30643	N-acetylglucosamine-1-phosphodiester alpha-N-acetylglucosaminidase	Sun et al., 2023 (PMID: 37794186)	54219	European (U.K.)	Continuous	2025-05-06	Q9UK23	NAGPA	Inflammation_II
OID30520	NADH dehydrogenase [ubiquinone] 1 alpha subcomplex subunit 5	Sun et al., 2023 (PMID: 37794186)	54219	European (U.K.)	Continuous	2025-05-06	Q16718	NDUFA5	Inflammation_II
OID30105	Nebulin	Sun et al., 2023 (PMID: 37794186)	54219	European (U.K.)	Continuous	2025-05-06	P20929	NEB	Cardiometabolic_II
OID30089	Adaptin ear-binding coat-associated protein 2	Sun et al., 2023 (PMID: 37794186)	54219	European (U.K.)	Continuous	2025-05-06	Q9NVZ3	NECAP2	Cardiometabolic_II
OID30545	Nectin-1	Sun et al., 2023 (PMID: 37794186)	54219	European (U.K.)	Continuous	2025-05-06	Q15223	NECTIN1	Inflammation_II
OID30521	E3 ubiquitin-protein ligase NEDD4-like	Sun et al., 2023 (PMID: 37794186)	54219	European (U.K.)	Continuous	2025-05-06	Q96PU5	NEDD4L	Inflammation_II
OID30503	Enhancer of filamentation 1	Sun et al., 2023 (PMID: 37794186)	54219	European (U.K.)	Continuous	2025-05-06	Q14511	NEDD9	Inflammation_II
OID30678	Nexilin	Sun et al., 2023 (PMID: 37794186)	54219	European (U.K.)	Continuous	2025-05-06	Q0ZGT2	NEXN	Inflammation_II
OID30522	Nuclear factor of activated T-cells 5	Sun et al., 2023 (PMID: 37794186)	54219	European (U.K.)	Continuous	2025-05-06	O94916	NFAT5	Inflammation_II
OID30268	Transcription factor NF-E2 45 kDa subunit	Sun et al., 2023 (PMID: 37794186)	54219	European (U.K.)	Continuous	2025-05-06	Q16621	NFE2	Cardiometabolic_II
OID30160	Nuclear factor NF-kappa-B p105 subunit	Sun et al., 2023 (PMID: 37794186)	54219	European (U.K.)	Continuous	2025-05-06	P19838	NFKB1	Cardiometabolic_II
OID30158	Transcriptional repressor NF-X1	Sun et al., 2023 (PMID: 37794186)	54219	European (U.K.)	Continuous	2025-05-06	Q12986	NFX1	Cardiometabolic_II
OID30134	Nuclear transcription factor Y subunit alpha	Sun et al., 2023 (PMID: 37794186)	54219	European (U.K.)	Continuous	2025-05-06	P23511	NFYA	Cardiometabolic_II
OID30300	Tumor necrosis factor receptor superfamily member 16	Sun et al., 2023 (PMID: 37794186)	54219	European (U.K.)	Continuous	2025-05-06	P08138	NGFR	Cardiometabolic_II
OID30614	NHL repeat-containing protein 3	Sun et al., 2023 (PMID: 37794186)	54219	European (U.K.)	Continuous	2025-05-06	Q5JS37	NHLRC3	Inflammation_II
OID30252	Deaminated glutathione amidase	Sun et al., 2023 (PMID: 37794186)	54219	European (U.K.)	Continuous	2025-05-06	Q86X76	NIT1	Cardiometabolic_II
OID30336	Omega-amidase NIT2	Sun et al., 2023 (PMID: 37794186)	54219	European (U.K.)	Continuous	2025-05-06	Q9NQR4	NIT2	Cardiometabolic_II
OID30451	Nucleoside diphosphate kinase A	Sun et al., 2023 (PMID: 37794186)	54219	European (U.K.)	Continuous	2025-05-06	P15531	NME1	Inflammation_II
OID30055	Nucleolar protein 56	Sun et al., 2023 (PMID: 37794186)	54219	European (U.K.)	Continuous	2025-05-06	O00567	NOP56	Cardiometabolic_II
OID30087	Nitric oxide synthase, inducible	Sun et al., 2023 (PMID: 37794186)	54219	European (U.K.)	Continuous	2025-05-06	P35228	NOS2	Cardiometabolic_II
OID30407	Neurogenic locus notch homolog protein 2	Sun et al., 2023 (PMID: 37794186)	54219	European (U.K.)	Continuous	2025-05-06	Q04721	NOTCH2	Cardiometabolic_II
OID30418	NPC intracellular cholesterol transporter 2	Sun et al., 2023 (PMID: 37794186)	54219	European (U.K.)	Continuous	2025-05-06	P61916	NPC2	Cardiometabolic_II
OID30540	Nephrin	Sun et al., 2023 (PMID: 37794186)	54219	European (U.K.)	Continuous	2025-05-06	O60500	NPHS1	Inflammation_II
OID30462	Podocin	Sun et al., 2023 (PMID: 37794186)	54219	European (U.K.)	Continuous	2025-05-06	Q9NP85	NPHS2	Inflammation_II
OID30329	N-acetylneuraminate lyase	Sun et al., 2023 (PMID: 37794186)	54219	European (U.K.)	Continuous	2025-05-06	Q9BXD5	NPL	Cardiometabolic_II
OID30116	Atrial natriuretic peptide receptor 1	Sun et al., 2023 (PMID: 37794186)	54219	European (U.K.)	Continuous	2025-05-06	P16066	NPR1	Cardiometabolic_II
OID30390	Neuronal pentraxin-2	Sun et al., 2023 (PMID: 37794186)	54219	European (U.K.)	Continuous	2025-05-06	P47972	NPTX2	Cardiometabolic_II
OID30674	Neurogranin	Sun et al., 2023 (PMID: 37794186)	54219	European (U.K.)	Continuous	2025-05-06	Q92686	NRGN	Inflammation_II
OID30294	5'(3')-deoxyribonucleotidase, cytosolic type	Sun et al., 2023 (PMID: 37794186)	54219	European (U.K.)	Continuous	2025-05-06	Q8TCD5	NT5C	Cardiometabolic_II
OID30198	Diphosphoinositol polyphosphate phosphohydrolase 3-alpha	Sun et al., 2023 (PMID: 37794186)	54219	European (U.K.)	Continuous	2025-05-06	Q8NFP7	NUDT10	Cardiometabolic_II
OID30102	Nucleotide triphosphate diphosphatase NUDT15	Sun et al., 2023 (PMID: 37794186)	54219	European (U.K.)	Continuous	2025-05-06	Q9NV35	NUDT15	Cardiometabolic_II
OID30568	Protein numb homolog	Sun et al., 2023 (PMID: 37794186)	54219	European (U.K.)	Continuous	2025-05-06	P49757	NUMB	Inflammation_II
OID30100	Nuclear pore complex protein Nup50	Sun et al., 2023 (PMID: 37794186)	54219	European (U.K.)	Continuous	2025-05-06	Q9UKX7	NUP50	Cardiometabolic_II
OID30076	NXPE family member 4	Sun et al., 2023 (PMID: 37794186)	54219	European (U.K.)	Continuous	2025-05-06	Q6UWF7	NXPE4	Cardiometabolic_II
OID30565	Neurexophilin-3	Sun et al., 2023 (PMID: 37794186)	54219	European (U.K.)	Continuous	2025-05-06	O95157	NXPH3	Inflammation_II
OID30665	Olfactomedin-4	Sun et al., 2023 (PMID: 37794186)	54219	European (U.K.)	Continuous	2025-05-06	Q6UX06	OLFM4	Inflammation_II
OID30201	5-oxoprolinase	Sun et al., 2023 (PMID: 37794186)	54219	European (U.K.)	Continuous	2025-05-06	O14841	OPLAH	Cardiometabolic_II
OID30768	Alpha-1-acid glycoprotein 1	Sun et al., 2023 (PMID: 37794186)	54219	European (U.K.)	Continuous	2025-05-06	P02763	ORM1	Inflammation_II
OID30227	Succinyl-CoA:3-ketoacid coenzyme A transferase 1, mitochondrial	Sun et al., 2023 (PMID: 37794186)	54219	European (U.K.)	Continuous	2025-05-06	P55809	OXCT1	Cardiometabolic_II
OID30186	Phosphofurin acidic cluster sorting protein 2	Sun et al., 2023 (PMID: 37794186)	54219	European (U.K.)	Continuous	2025-05-06	Q86VP3	PACS2	Cardiometabolic_II
OID30206	PAXIP1-associated glutamate-rich protein 1	Sun et al., 2023 (PMID: 37794186)	54219	European (U.K.)	Continuous	2025-05-06	Q9BTK6	PAGR1	Cardiometabolic_II
OID30444	Palladin	Sun et al., 2023 (PMID: 37794186)	54219	European (U.K.)	Continuous	2025-05-06	Q8WX93	PALLD	Inflammation_II
OID30182	Paralemmin-3	Sun et al., 2023 (PMID: 37794186)	54219	European (U.K.)	Continuous	2025-05-06	A6NDB9	PALM3	Cardiometabolic_II
OID30591	Protein PAXX	Sun et al., 2023 (PMID: 37794186)	54219	European (U.K.)	Continuous	2025-05-06	Q9BUH6	PAXX	Inflammation_II
OID30610	Pterin-4-alpha-carbinolamine dehydratase	Sun et al., 2023 (PMID: 37794186)	54219	European (U.K.)	Continuous	2025-05-06	P61457	PCBD1	Inflammation_II
OID30323	28 kDa heat- and acid-stable phosphoprotein	Sun et al., 2023 (PMID: 37794186)	54219	European (U.K.)	Continuous	2025-05-06	Q13442	PDAP1	Cardiometabolic_II
OID30084	cAMP-specific 3',5'-cyclic phosphodiesterase 4D	Sun et al., 2023 (PMID: 37794186)	54219	European (U.K.)	Continuous	2025-05-06	Q08499	PDE4D	Cardiometabolic_II
OID30584	cGMP-specific 3',5'-cyclic phosphodiesterase	Sun et al., 2023 (PMID: 37794186)	54219	European (U.K.)	Continuous	2025-05-06	O76074	PDE5A	Inflammation_II
OID30573	Protein disulfide-isomerase A3	Sun et al., 2023 (PMID: 37794186)	54219	European (U.K.)	Continuous	2025-05-06	P30101	PDIA3	Inflammation_II
OID30375	Protein disulfide-isomerase A4	Sun et al., 2023 (PMID: 37794186)	54219	European (U.K.)	Continuous	2025-05-06	P13667	PDIA4	Cardiometabolic_II
OID30151	PDZ domain-containing protein 2	Sun et al., 2023 (PMID: 37794186)	54219	European (U.K.)	Continuous	2025-05-06	O15018	PDZD2	Cardiometabolic_II
OID30550	Na(+)/H(+) exchange regulatory cofactor NHE-RF3	Sun et al., 2023 (PMID: 37794186)	54219	European (U.K.)	Continuous	2025-05-06	Q5T2W1	PDZK1	Inflammation_II
OID30228	Peroxisomal trans-2-enoyl-CoA reductase	Sun et al., 2023 (PMID: 37794186)	54219	European (U.K.)	Continuous	2025-05-06	Q9BY49	PECR	Cardiometabolic_II
OID30666	Proenkephalin-A	Sun et al., 2023 (PMID: 37794186)	54219	European (U.K.)	Continuous	2025-05-06	P01210	PENK	Inflammation_II
OID30688	Xaa-Pro dipeptidase	Sun et al., 2023 (PMID: 37794186)	54219	European (U.K.)	Continuous	2025-05-06	P12955	PEPD	Inflammation_II
OID30511	Period circadian protein homolog 3	Sun et al., 2023 (PMID: 37794186)	54219	European (U.K.)	Continuous	2025-05-06	P56645	PER3	Inflammation_II
OID30764	Platelet factor 4	Sun et al., 2023 (PMID: 37794186)	54219	European (U.K.)	Continuous	2025-05-06	P02776	PF4	Inflammation_II
OID30699	Pepsin A-4	Sun et al., 2023 (PMID: 37794186)	54219	European (U.K.)	Continuous	2025-05-06	P0DJD7	PGA4	Inflammation_II
OID30344	6-phosphogluconate dehydrogenase, decarboxylating	Sun et al., 2023 (PMID: 37794186)	54219	European (U.K.)	Continuous	2025-05-06	P52209	PGD	Cardiometabolic_II
OID30742	N-acetylmuramoyl-L-alanine amidase	Sun et al., 2023 (PMID: 37794186)	54219	European (U.K.)	Continuous	2025-05-06	Q96PD5	PGLYRP2	Inflammation_II
OID30101	Peptidoglycan recognition protein 4	Sun et al., 2023 (PMID: 37794186)	54219	European (U.K.)	Continuous	2025-05-06	Q96LB8	PGLYRP4	Cardiometabolic_II
OID30460	Progesterone receptor	Sun et al., 2023 (PMID: 37794186)	54219	European (U.K.)	Continuous	2025-05-06	P06401	PGR	Inflammation_II
OID30634	5-phosphohydroxy-L-lysine phospho-lyase	Sun et al., 2023 (PMID: 37794186)	54219	European (U.K.)	Continuous	2025-05-06	Q8IUZ5	PHYKPL	Inflammation_II
OID30676	Peptidase inhibitor 16	Sun et al., 2023 (PMID: 37794186)	54219	European (U.K.)	Continuous	2025-05-06	Q6UXB8	PI16	Inflammation_II
OID30465	1-phosphatidylinositol 3-phosphate 5-kinase	Sun et al., 2023 (PMID: 37794186)	54219	European (U.K.)	Continuous	2025-05-06	Q9Y2I7	PIKFYVE	Inflammation_II
OID30651	phospholipase A2 inhibitor and Ly6/PLAUR domain-containing protein	Sun et al., 2023 (PMID: 37794186)	54219	European (U.K.)	Continuous	2025-05-06	A6NC86	PINLYP	Inflammation_II
OID30328	Polycystin-1	Sun et al., 2023 (PMID: 37794186)	54219	European (U.K.)	Continuous	2025-05-06	P98161	PKD1	Cardiometabolic_II
OID30184	Polycystin-2	Sun et al., 2023 (PMID: 37794186)	54219	European (U.K.)	Continuous	2025-05-06	Q13563	PKD2	Cardiometabolic_II
OID30484	1-phosphatidylinositol 4,5-bisphosphate phosphodiesterase beta-1	Sun et al., 2023 (PMID: 37794186)	54219	European (U.K.)	Continuous	2025-05-06	Q9NQ66	PLCB1	Inflammation_II
OID30785	Plasminogen	Sun et al., 2023 (PMID: 37794186)	54219	European (U.K.)	Continuous	2025-05-06	P00747	PLG	Inflammation_II
OID30172	Pro-MCH	Sun et al., 2023 (PMID: 37794186)	54219	European (U.K.)	Continuous	2025-05-06	P20382	PMCH	Cardiometabolic_II
OID30125	Phosphomannomutase 2	Sun et al., 2023 (PMID: 37794186)	54219	European (U.K.)	Continuous	2025-05-06	O15305	PMM2	Cardiometabolic_II
OID30693	Pancreatic triacylglycerol lipase	Sun et al., 2023 (PMID: 37794186)	54219	European (U.K.)	Continuous	2025-05-06	P16233	PNLIP	Inflammation_II
OID30194	Paraneoplastic antigen Ma1	Sun et al., 2023 (PMID: 37794186)	54219	European (U.K.)	Continuous	2025-05-06	Q8ND90	PNMA1	Cardiometabolic_II
OID30504	Protein POF1B	Sun et al., 2023 (PMID: 37794186)	54219	European (U.K.)	Continuous	2025-05-06	Q8WVV4	POF1B	Inflammation_II
OID30440	DNA-directed RNA polymerase II subunit RPB1	Sun et al., 2023 (PMID: 37794186)	54219	European (U.K.)	Continuous	2025-05-06	P24928	POLR2A	Inflammation_II
OID30282	Pro-opiomelanocortin	Sun et al., 2023 (PMID: 37794186)	54219	European (U.K.)	Continuous	2025-05-06	P01189	POMC	Cardiometabolic_II
OID30704	Serum paraoxonase/arylesterase 1	Sun et al., 2023 (PMID: 37794186)	54219	European (U.K.)	Continuous	2025-05-06	P27169	PON1	Inflammation_II
OID30410	Periostin	Sun et al., 2023 (PMID: 37794186)	54219	European (U.K.)	Continuous	2025-05-06	Q15063	POSTN	Cardiometabolic_II
OID30761	Platelet basic protein	Sun et al., 2023 (PMID: 37794186)	54219	European (U.K.)	Continuous	2025-05-06	P02775	PPBP	Inflammation_II
OID30385	Peptidyl-prolyl cis-trans isomerase F, mitochondrial	Sun et al., 2023 (PMID: 37794186)	54219	European (U.K.)	Continuous	2025-05-06	P30405	PPIF	Cardiometabolic_II
OID30564	Periplakin	Sun et al., 2023 (PMID: 37794186)	54219	European (U.K.)	Continuous	2025-05-06	O60437	PPL	Inflammation_II
OID30548	Protein phosphatase 1B	Sun et al., 2023 (PMID: 37794186)	54219	European (U.K.)	Continuous	2025-05-06	O75688	PPM1B	Inflammation_II
OID30350	Protein phosphatase 1F	Sun et al., 2023 (PMID: 37794186)	54219	European (U.K.)	Continuous	2025-05-06	P49593	PPM1F	Cardiometabolic_II
OID30391	Proline-rich acidic protein 1	Sun et al., 2023 (PMID: 37794186)	54219	European (U.K.)	Continuous	2025-05-06	Q96NZ9	PRAP1	Cardiometabolic_II
OID30668	Peroxiredoxin-2	Sun et al., 2023 (PMID: 37794186)	54219	European (U.K.)	Continuous	2025-05-06	P32119	PRDX2	Inflammation_II
OID30381	Bone marrow proteoglycan	Sun et al., 2023 (PMID: 37794186)	54219	European (U.K.)	Continuous	2025-05-06	P13727	PRG2	Cardiometabolic_II
OID30383	Proteoglycan 3	Sun et al., 2023 (PMID: 37794186)	54219	European (U.K.)	Continuous	2025-05-06	Q9Y2Y8	PRG3	Cardiometabolic_II
OID30140	Serine/threonine-protein kinase D2	Sun et al., 2023 (PMID: 37794186)	54219	European (U.K.)	Continuous	2025-05-06	Q9BZL6	PRKD2	Cardiometabolic_II
OID30621	cGMP-dependent protein kinase 1	Sun et al., 2023 (PMID: 37794186)	54219	European (U.K.)	Continuous	2025-05-06	Q13976	PRKG1	Inflammation_II
OID30149	Endothelial protein C receptor	Sun et al., 2023 (PMID: 37794186)	54219	European (U.K.)	Continuous	2025-05-06	Q9UNN8	PROCR	Cardiometabolic_II
OID30737	Vitamin K-dependent protein S	Sun et al., 2023 (PMID: 37794186)	54219	European (U.K.)	Continuous	2025-05-06	P07225	PROS1	Inflammation_II
OID30607	Proline-rich protein 4	Sun et al., 2023 (PMID: 37794186)	54219	European (U.K.)	Continuous	2025-05-06	Q16378	PRR4	Inflammation_II
OID30457	Proline-rich protein 5	Sun et al., 2023 (PMID: 37794186)	54219	European (U.K.)	Continuous	2025-05-06	P85299	PRR5	Inflammation_II
OID30276	Proline-rich transmembrane protein 3	Sun et al., 2023 (PMID: 37794186)	54219	European (U.K.)	Continuous	2025-05-06	Q5FWE3	PRRT3	Cardiometabolic_II
OID30483	Brain-specific serine protease 4	Sun et al., 2023 (PMID: 37794186)	54219	European (U.K.)	Continuous	2025-05-06	Q9GZN4	PRSS22	Inflammation_II
OID30419	Prosaposin	Sun et al., 2023 (PMID: 37794186)	54219	European (U.K.)	Continuous	2025-05-06	P07602	PSAP	Cardiometabolic_II
OID30514	Proteasome assembly chaperone 4	Sun et al., 2023 (PMID: 37794186)	54219	European (U.K.)	Continuous	2025-05-06	Q5JS54	PSMG4	Inflammation_II
OID30596	Proline-serine-threonine phosphatase-interacting protein 2	Sun et al., 2023 (PMID: 37794186)	54219	European (U.K.)	Continuous	2025-05-06	Q9H939	PSTPIP2	Inflammation_II
OID30561	Prostaglandin E synthase 2	Sun et al., 2023 (PMID: 37794186)	54219	European (U.K.)	Continuous	2025-05-06	Q9H7Z7	PTGES2	Inflammation_II
OID30297	Prostaglandin reductase 1	Sun et al., 2023 (PMID: 37794186)	54219	European (U.K.)	Continuous	2025-05-06	Q14914	PTGR1	Cardiometabolic_II
OID30469	Protein tyrosine phosphatase type IVA 3	Sun et al., 2023 (PMID: 37794186)	54219	European (U.K.)	Continuous	2025-05-06	O75365	PTP4A3	Inflammation_II
OID30437	Tyrosine-protein phosphatase non-receptor type 9	Sun et al., 2023 (PMID: 37794186)	54219	European (U.K.)	Continuous	2025-05-06	P43378	PTPN9	Inflammation_II
OID30324	Receptor-type tyrosine-protein phosphatase beta	Sun et al., 2023 (PMID: 37794186)	54219	European (U.K.)	Continuous	2025-05-06	P23467	PTPRB	Cardiometabolic_II
OID30380	Receptor-type tyrosine-protein phosphatase C	Sun et al., 2023 (PMID: 37794186)	54219	European (U.K.)	Continuous	2025-05-06	P08575	PTPRC	Cardiometabolic_II
OID30343	Receptor-type tyrosine-protein phosphatase zeta	Sun et al., 2023 (PMID: 37794186)	54219	European (U.K.)	Continuous	2025-05-06	P23471	PTPRZ1	Cardiometabolic_II
OID30659	Putative peptidyl-tRNA hydrolase PTRHD1	Sun et al., 2023 (PMID: 37794186)	54219	European (U.K.)	Continuous	2025-05-06	Q6GMV3	PTRHD1	Inflammation_II
OID30202	Pyrin domain-containing protein 1	Sun et al., 2023 (PMID: 37794186)	54219	European (U.K.)	Continuous	2025-05-06	Q8WXC3	PYDC1	Cardiometabolic_II
OID30150	Peptide YY	Sun et al., 2023 (PMID: 37794186)	54219	European (U.K.)	Continuous	2025-05-06	P10082	PYY	Cardiometabolic_II
OID30730	Pregnancy zone protein	Sun et al., 2023 (PMID: 37794186)	54219	European (U.K.)	Continuous	2025-05-06	P20742	PZP	Inflammation_II
OID30729	Sulfhydryl oxidase 1	Sun et al., 2023 (PMID: 37794186)	54219	European (U.K.)	Continuous	2025-05-06	O00391	QSOX1	Inflammation_II
OID30357	Ras-related protein Rab-10	Sun et al., 2023 (PMID: 37794186)	54219	European (U.K.)	Continuous	2025-05-06	P61026	RAB10	Cardiometabolic_II
OID30325	Rab11 family-interacting protein 3	Sun et al., 2023 (PMID: 37794186)	54219	European (U.K.)	Continuous	2025-05-06	O75154	RAB11FIP3	Cardiometabolic_II
OID30354	Ras-related protein Rab-27B	Sun et al., 2023 (PMID: 37794186)	54219	European (U.K.)	Continuous	2025-05-06	O00194	RAB27B	Cardiometabolic_II
OID30122	Ras-related protein Rab-33A	Sun et al., 2023 (PMID: 37794186)	54219	European (U.K.)	Continuous	2025-05-06	Q14088	RAB33A	Cardiometabolic_II
OID30069	Ras-related protein Rab-39B	Sun et al., 2023 (PMID: 37794186)	54219	European (U.K.)	Continuous	2025-05-06	Q96DA2	RAB39B	Cardiometabolic_II
OID30647	Rab GTPase-binding effector protein 1	Sun et al., 2023 (PMID: 37794186)	54219	European (U.K.)	Continuous	2025-05-06	Q15276	RABEP1	Inflammation_II
OID30567	Ras-related protein Ral-B	Sun et al., 2023 (PMID: 37794186)	54219	European (U.K.)	Continuous	2025-05-06	P11234	RALB	Inflammation_II
OID30258	Ran-specific GTPase-activating protein	Sun et al., 2023 (PMID: 37794186)	54219	European (U.K.)	Continuous	2025-05-06	P43487	RANBP1	Cardiometabolic_II
OID30452	Ras-related protein Rap-1A	Sun et al., 2023 (PMID: 37794186)	54219	European (U.K.)	Continuous	2025-05-06	P62834	RAP1A	Inflammation_II
OID30090	Probable RNA-binding protein 19	Sun et al., 2023 (PMID: 37794186)	54219	European (U.K.)	Continuous	2025-05-06	Q9Y4C8	RBM19	Cardiometabolic_II
OID30507	RNA-binding protein with multiple splicing	Sun et al., 2023 (PMID: 37794186)	54219	European (U.K.)	Continuous	2025-05-06	Q93062	RBPMS	Inflammation_II
OID30257	RNA-binding protein with multiple splicing 2	Sun et al., 2023 (PMID: 37794186)	54219	European (U.K.)	Continuous	2025-05-06	Q6ZRY4	RBPMS2	Cardiometabolic_II
OID30234	Reversion-inducing cysteine-rich protein with Kazal motifs	Sun et al., 2023 (PMID: 37794186)	54219	European (U.K.)	Continuous	2025-05-06	O95980	RECK	Cardiometabolic_II
OID30463	Transcription factor RelB	Sun et al., 2023 (PMID: 37794186)	54219	European (U.K.)	Continuous	2025-05-06	Q01201	RELB	Inflammation_II
OID30496	RalBP1-associated Eps domain-containing protein 1	Sun et al., 2023 (PMID: 37794186)	54219	European (U.K.)	Continuous	2025-05-06	Q96D71	REPS1	Inflammation_II
OID30075	Oligoribonuclease, mitochondrial	Sun et al., 2023 (PMID: 37794186)	54219	European (U.K.)	Continuous	2025-05-06	Q9Y3B8	REXO2	Cardiometabolic_II
OID30433	Rapamycin-insensitive companion of mTOR	Sun et al., 2023 (PMID: 37794186)	54219	European (U.K.)	Continuous	2025-05-06	Q6R327	RICTOR	Inflammation_II
OID30635	2-iminobutanoate/2-iminopropanoate deaminase	Sun et al., 2023 (PMID: 37794186)	54219	European (U.K.)	Continuous	2025-05-06	P52758	RIDA	Inflammation_II
OID30342	RILP-like protein 2	Sun et al., 2023 (PMID: 37794186)	54219	European (U.K.)	Continuous	2025-05-06	Q969X0	RILPL2	Cardiometabolic_II
OID30138	Receptor-interacting serine/threonine-protein kinase 4	Sun et al., 2023 (PMID: 37794186)	54219	European (U.K.)	Continuous	2025-05-06	P57078	RIPK4	Cardiometabolic_II
OID30601	Prorelaxin H2	Sun et al., 2023 (PMID: 37794186)	54219	European (U.K.)	Continuous	2025-05-06	P04090	RLN2	Inflammation_II
OID30672	Ribonuclease pancreatic	Sun et al., 2023 (PMID: 37794186)	54219	European (U.K.)	Continuous	2025-05-06	P07998	RNASE1	Inflammation_II
OID30238	Inactive ribonuclease-like protein 10	Sun et al., 2023 (PMID: 37794186)	54219	European (U.K.)	Continuous	2025-05-06	Q5GAN6	RNASE10	Cardiometabolic_II
OID30705	Ribonuclease 4	Sun et al., 2023 (PMID: 37794186)	54219	European (U.K.)	Continuous	2025-05-06	P34096	RNASE4	Inflammation_II
OID30689	Ribonuclease K6	Sun et al., 2023 (PMID: 37794186)	54219	European (U.K.)	Continuous	2025-05-06	Q93091	RNASE6	Inflammation_II
OID30235	E3 ubiquitin-protein ligase RNF149	Sun et al., 2023 (PMID: 37794186)	54219	European (U.K.)	Continuous	2025-05-06	Q8NC42	RNF149	Cardiometabolic_II
OID30506	E3 ubiquitin-protein ligase RNF168	Sun et al., 2023 (PMID: 37794186)	54219	European (U.K.)	Continuous	2025-05-06	Q8IYW5	RNF168	Inflammation_II
OID30473	E3 ubiquitin-protein ligase RNF31	Sun et al., 2023 (PMID: 37794186)	54219	European (U.K.)	Continuous	2025-05-06	Q96EP0	RNF31	Inflammation_II
OID30218	E3 ubiquitin-protein ligase RNF5	Sun et al., 2023 (PMID: 37794186)	54219	European (U.K.)	Continuous	2025-05-06	Q99942	RNF5	Cardiometabolic_II
OID30226	Roundabout homolog 4	Sun et al., 2023 (PMID: 37794186)	54219	European (U.K.)	Continuous	2025-05-06	Q8WZ75	ROBO4	Cardiometabolic_II
OID30453	Replication protein A 32 kDa subunit	Sun et al., 2023 (PMID: 37794186)	54219	European (U.K.)	Continuous	2025-05-06	P15927	RPA2	Inflammation_II
OID30284	60S ribosomal protein L14	Sun et al., 2023 (PMID: 37794186)	54219	European (U.K.)	Continuous	2025-05-06	P50914	RPL14	Cardiometabolic_II
OID30070	40S ribosomal protein S10	Sun et al., 2023 (PMID: 37794186)	54219	European (U.K.)	Continuous	2025-05-06	P46783	RPS10	Cardiometabolic_II
OID30049	Rhotekin-2	Sun et al., 2023 (PMID: 37794186)	54219	European (U.K.)	Continuous	2025-05-06	Q8IZC4	RTKN2	Cardiometabolic_II
OID30085	Ryanodine receptor 1	Sun et al., 2023 (PMID: 37794186)	54219	European (U.K.)	Continuous	2025-05-06	P21817	RYR1	Cardiometabolic_II
OID30529	Protein S100-A13	Sun et al., 2023 (PMID: 37794186)	54219	European (U.K.)	Continuous	2025-05-06	Q99584	S100A13	Inflammation_II
OID30726	Serum amyloid A-4 protein	Sun et al., 2023 (PMID: 37794186)	54219	European (U.K.)	Continuous	2025-05-06	P35542	SAA4	Inflammation_II
OID30331	Specifically androgen-regulated gene protein	Sun et al., 2023 (PMID: 37794186)	54219	European (U.K.)	Continuous	2025-05-06	Q9BW04	SARG	Cardiometabolic_II
OID30113	U4/U6.U5 tri-snRNP-associated protein 1	Sun et al., 2023 (PMID: 37794186)	54219	European (U.K.)	Continuous	2025-05-06	O43290	SART1	Cardiometabolic_II
OID30111	Diamine acetyltransferase 1	Sun et al., 2023 (PMID: 37794186)	54219	European (U.K.)	Continuous	2025-05-06	P21673	SAT1	Cardiometabolic_II
OID30398	Suprabasin	Sun et al., 2023 (PMID: 37794186)	54219	European (U.K.)	Continuous	2025-05-06	Q6UWP8	SBSN	Cardiometabolic_II
OID30104	Mammaglobin-A	Sun et al., 2023 (PMID: 37794186)	54219	European (U.K.)	Continuous	2025-05-06	Q13296	SCGB2A2	Cardiometabolic_II
OID30577	Secretoglobin family 3A member 1	Sun et al., 2023 (PMID: 37794186)	54219	European (U.K.)	Continuous	2025-05-06	Q96QR1	SCGB3A1	Inflammation_II
OID30277	Sodium channel subunit beta-4	Sun et al., 2023 (PMID: 37794186)	54219	European (U.K.)	Continuous	2025-05-06	Q8IWT1	SCN4B	Cardiometabolic_II
OID30278	Retinoid-inducible serine carboxypeptidase	Sun et al., 2023 (PMID: 37794186)	54219	European (U.K.)	Continuous	2025-05-06	Q9HB40	SCPEP1	Cardiometabolic_II
OID30333	Scrapie-responsive protein 1	Sun et al., 2023 (PMID: 37794186)	54219	European (U.K.)	Continuous	2025-05-06	O75711	SCRG1	Cardiometabolic_II
OID30225	Protein scribble homolog	Sun et al., 2023 (PMID: 37794186)	54219	European (U.K.)	Continuous	2025-05-06	Q14160	SCRIB	Cardiometabolic_II
OID30558	Protein scribble homolog	Sun et al., 2023 (PMID: 37794186)	54219	European (U.K.)	Continuous	2025-05-06	Q14160	SCRIB	Inflammation_II
OID30662	Protein sidekick-2	Sun et al., 2023 (PMID: 37794186)	54219	European (U.K.)	Continuous	2025-05-06	Q58EX2	SDK2	Inflammation_II
OID30269	Protein transport protein Sec31A	Sun et al., 2023 (PMID: 37794186)	54219	European (U.K.)	Continuous	2025-05-06	O94979	SEC31A	Cardiometabolic_II
OID30196	Protein sel-1 homolog 1	Sun et al., 2023 (PMID: 37794186)	54219	European (U.K.)	Continuous	2025-05-06	Q9UBV2	SEL1L	Cardiometabolic_II
OID30745	Selenoprotein P	Sun et al., 2023 (PMID: 37794186)	54219	European (U.K.)	Continuous	2025-05-06	P49908	SELENOP	Inflammation_II
OID30752	L-selectin	Sun et al., 2023 (PMID: 37794186)	54219	European (U.K.)	Continuous	2025-05-06	P14151	SELL	Inflammation_II
OID30599	Semaphorin-3G	Sun et al., 2023 (PMID: 37794186)	54219	European (U.K.)	Continuous	2025-05-06	Q9NS98	SEMA3G	Inflammation_II
OID30531	Semaphorin-6C	Sun et al., 2023 (PMID: 37794186)	54219	European (U.K.)	Continuous	2025-05-06	Q9H3T2	SEMA6C	Inflammation_II
OID30750	Alpha-1-antitrypsin	Sun et al., 2023 (PMID: 37794186)	54219	European (U.K.)	Continuous	2025-05-06	P01009	SERPINA1	Inflammation_II
OID30786	Alpha-1-antichymotrypsin	Sun et al., 2023 (PMID: 37794186)	54219	European (U.K.)	Continuous	2025-05-06	P01011	SERPINA3	Inflammation_II
OID30774	Kallistatin	Sun et al., 2023 (PMID: 37794186)	54219	European (U.K.)	Continuous	2025-05-06	P29622	SERPINA4	Inflammation_II
OID30763	Plasma serine protease inhibitor	Sun et al., 2023 (PMID: 37794186)	54219	European (U.K.)	Continuous	2025-05-06	P05154	SERPINA5	Inflammation_II
OID30743	Corticosteroid-binding globulin	Sun et al., 2023 (PMID: 37794186)	54219	European (U.K.)	Continuous	2025-05-06	P08185	SERPINA6	Inflammation_II
OID30724	Thyroxine-binding globulin	Sun et al., 2023 (PMID: 37794186)	54219	European (U.K.)	Continuous	2025-05-06	P05543	SERPINA7	Inflammation_II
OID30789	Antithrombin-III	Sun et al., 2023 (PMID: 37794186)	54219	European (U.K.)	Continuous	2025-05-06	P01008	SERPINC1	Inflammation_II
OID30767	Heparin cofactor 2	Sun et al., 2023 (PMID: 37794186)	54219	European (U.K.)	Continuous	2025-05-06	P05546	SERPIND1	Inflammation_II
OID30359	Glia-derived nexin	Sun et al., 2023 (PMID: 37794186)	54219	European (U.K.)	Continuous	2025-05-06	P07093	SERPINE2	Cardiometabolic_II
OID30757	Pigment epithelium-derived factor	Sun et al., 2023 (PMID: 37794186)	54219	European (U.K.)	Continuous	2025-05-06	P36955	SERPINF1	Inflammation_II
OID30779	Alpha-2-antiplasmin	Sun et al., 2023 (PMID: 37794186)	54219	European (U.K.)	Continuous	2025-05-06	P08697	SERPINF2	Inflammation_II
OID30777	Plasma protease C1 inhibitor	Sun et al., 2023 (PMID: 37794186)	54219	European (U.K.)	Continuous	2025-05-06	P05155	SERPING1	Inflammation_II
OID30604	Neuroserpin	Sun et al., 2023 (PMID: 37794186)	54219	European (U.K.)	Continuous	2025-05-06	Q99574	SERPINI1	Inflammation_II
OID30648	Secreted frizzled-related protein 4	Sun et al., 2023 (PMID: 37794186)	54219	European (U.K.)	Continuous	2025-05-06	Q6FHJ7	SFRP4	Inflammation_II
OID30341	N-sulphoglucosamine sulphohydrolase	Sun et al., 2023 (PMID: 37794186)	54219	European (U.K.)	Continuous	2025-05-06	P51688	SGSH	Cardiometabolic_II
OID30685	Sex hormone-binding globulin	Sun et al., 2023 (PMID: 37794186)	54219	European (U.K.)	Continuous	2025-05-06	P04278	SHBG	Inflammation_II
OID30098	SH2 domain-containing adapter protein D	Sun et al., 2023 (PMID: 37794186)	54219	European (U.K.)	Continuous	2025-05-06	Q96IW2	SHD	Cardiometabolic_II
OID30516	Sonic hedgehog protein	Sun et al., 2023 (PMID: 37794186)	54219	European (U.K.)	Continuous	2025-05-06	Q15465	SHH	Inflammation_II
OID30387	Protein shisa-5	Sun et al., 2023 (PMID: 37794186)	54219	European (U.K.)	Continuous	2025-05-06	Q8N114	SHISA5	Cardiometabolic_II
OID30261	Sialic acid-binding Ig-like lectin 8	Sun et al., 2023 (PMID: 37794186)	54219	European (U.K.)	Continuous	2025-05-06	Q9NYZ4	SIGLEC8	Cardiometabolic_II
OID30207	Nucleotide exchange factor SIL1	Sun et al., 2023 (PMID: 37794186)	54219	European (U.K.)	Continuous	2025-05-06	Q9H173	SIL1	Cardiometabolic_II
OID30439	NAD-dependent protein deacetylase sirtuin-1	Sun et al., 2023 (PMID: 37794186)	54219	European (U.K.)	Continuous	2025-05-06	Q96EB6	SIRT1	Inflammation_II
OID30056	Helicase SKI2W	Sun et al., 2023 (PMID: 37794186)	54219	European (U.K.)	Continuous	2025-05-06	Q15477	SKIV2L	Cardiometabolic_II
OID30077	Solute carrier family 12 member 2	Sun et al., 2023 (PMID: 37794186)	54219	European (U.K.)	Continuous	2025-05-06	P55011	SLC12A2	Cardiometabolic_II
OID30369	Band 3 anion transport protein	Sun et al., 2023 (PMID: 37794186)	54219	European (U.K.)	Continuous	2025-05-06	P02730	SLC4A1	Cardiometabolic_II
OID30107	Organic solute transporter subunit beta	Sun et al., 2023 (PMID: 37794186)	54219	European (U.K.)	Continuous	2025-05-06	Q86UW2	SLC51B	Cardiometabolic_II
OID30630	Na(+)/H(+) exchange regulatory cofactor NHE-RF1	Sun et al., 2023 (PMID: 37794186)	54219	European (U.K.)	Continuous	2025-05-06	O14745	SLC9A3R1	Inflammation_II
OID30510	SLIT and NTRK-like protein 1	Sun et al., 2023 (PMID: 37794186)	54219	European (U.K.)	Continuous	2025-05-06	Q96PX8	SLITRK1	Inflammation_II
OID30404	Secreted Ly-6/uPAR-related protein 1	Sun et al., 2023 (PMID: 37794186)	54219	European (U.K.)	Continuous	2025-05-06	P55000	SLURP1	Cardiometabolic_II
OID30477	Sphingomyelin phosphodiesterase 3	Sun et al., 2023 (PMID: 37794186)	54219	European (U.K.)	Continuous	2025-05-06	Q9NY59	SMPD3	Inflammation_II
OID30645	Alpha-synuclein	Sun et al., 2023 (PMID: 37794186)	54219	European (U.K.)	Continuous	2025-05-06	P37840	SNCA	Inflammation_II
OID30205	Sushi, nidogen and EGF-like domain-containing protein 1	Sun et al., 2023 (PMID: 37794186)	54219	European (U.K.)	Continuous	2025-05-06	Q8TER0	SNED1	Cardiometabolic_II
OID30052	NHP2-like protein 1	Sun et al., 2023 (PMID: 37794186)	54219	European (U.K.)	Continuous	2025-05-06	P55769	SNU13	Cardiometabolic_II
OID30644	Sorting nexin-15	Sun et al., 2023 (PMID: 37794186)	54219	European (U.K.)	Continuous	2025-05-06	Q9NRS6	SNX15	Inflammation_II
OID30215	Sorting nexin-5	Sun et al., 2023 (PMID: 37794186)	54219	European (U.K.)	Continuous	2025-05-06	Q9Y5X3	SNX5	Cardiometabolic_II
OID30683	Extracellular superoxide dismutase	Sun et al., 2023 (PMID: 37794186)	54219	European (U.K.)	Continuous	2025-05-06	P08294	SOD3	Inflammation_II
OID30656	Spartin	Sun et al., 2023 (PMID: 37794186)	54219	European (U.K.)	Continuous	2025-05-06	Q8N0X7	SPART	Inflammation_II
OID30298	Sperm equatorial segment protein 1	Sun et al., 2023 (PMID: 37794186)	54219	European (U.K.)	Continuous	2025-05-06	Q6UW49	SPESP1	Cardiometabolic_II
OID30627	Serine protease inhibitor Kazal-type 2	Sun et al., 2023 (PMID: 37794186)	54219	European (U.K.)	Continuous	2025-05-06	P20155	SPINK2	Inflammation_II
OID30153	Serine protease inhibitor Kazal-type 8	Sun et al., 2023 (PMID: 37794186)	54219	European (U.K.)	Continuous	2025-05-06	P0C7L1	SPINK8	Cardiometabolic_II
OID30423	Sprouty-related, EVH1 domain-containing protein 2	Sun et al., 2023 (PMID: 37794186)	54219	European (U.K.)	Continuous	2025-05-06	Q7Z698	SPRED2	Inflammation_II
OID30310	Sushi repeat-containing protein SRPX	Sun et al., 2023 (PMID: 37794186)	54219	European (U.K.)	Continuous	2025-05-06	P78539	SRPX	Cardiometabolic_II
OID30468	Single-stranded DNA-binding protein, mitochondrial	Sun et al., 2023 (PMID: 37794186)	54219	European (U.K.)	Continuous	2025-05-06	Q04837	SSBP1	Inflammation_II
OID30624	Hsc70-interacting protein	Sun et al., 2023 (PMID: 37794186)	54219	European (U.K.)	Continuous	2025-05-06	P50502	ST13	Inflammation_II
OID30442	Alpha-N-acetylneuraminide alpha-2,8-sialyltransferase	Sun et al., 2023 (PMID: 37794186)	54219	European (U.K.)	Continuous	2025-05-06	Q92185	ST8SIA1	Inflammation_II
OID30401	Stabilin-2	Sun et al., 2023 (PMID: 37794186)	54219	European (U.K.)	Continuous	2025-05-06	Q8WWQ8	STAB2	Cardiometabolic_II
OID30536	Signal transducer and activator of transcription 2	Sun et al., 2023 (PMID: 37794186)	54219	European (U.K.)	Continuous	2025-05-06	P52630	STAT2	Inflammation_II
OID30432	Syntaxin-5	Sun et al., 2023 (PMID: 37794186)	54219	European (U.K.)	Continuous	2025-05-06	Q13190	STX5	Inflammation_II
OID30560	Syntaxin-7	Sun et al., 2023 (PMID: 37794186)	54219	European (U.K.)	Continuous	2025-05-06	O15400	STX7	Inflammation_II
OID30486	Formylglycine-generating enzyme	Sun et al., 2023 (PMID: 37794186)	54219	European (U.K.)	Continuous	2025-05-06	Q8NBK3	SUMF1	Inflammation_II
OID30650	Sushi domain-containing protein 5	Sun et al., 2023 (PMID: 37794186)	54219	European (U.K.)	Continuous	2025-05-06	O60279	SUSD5	Inflammation_II
OID30636	Synapse-associated protein 1	Sun et al., 2023 (PMID: 37794186)	54219	European (U.K.)	Continuous	2025-05-06	Q96A49	SYAP1	Inflammation_II
OID30339	Synaptotagmin-like protein 4	Sun et al., 2023 (PMID: 37794186)	54219	European (U.K.)	Continuous	2025-05-06	Q96C24	SYTL4	Cardiometabolic_II
OID30414	Transaldolase	Sun et al., 2023 (PMID: 37794186)	54219	European (U.K.)	Continuous	2025-05-06	P37837	TALDO1	Cardiometabolic_II
OID30616	Tubulin-specific chaperone A	Sun et al., 2023 (PMID: 37794186)	54219	European (U.K.)	Continuous	2025-05-06	O75347	TBCA	Inflammation_II
OID30687	Transcobalamin-1	Sun et al., 2023 (PMID: 37794186)	54219	European (U.K.)	Continuous	2025-05-06	P20061	TCN1	Inflammation_II
OID30316	Treacle protein	Sun et al., 2023 (PMID: 37794186)	54219	European (U.K.)	Continuous	2025-05-06	Q13428	TCOF1	Cardiometabolic_II
OID30326	Tectonic-3	Sun et al., 2023 (PMID: 37794186)	54219	European (U.K.)	Continuous	2025-05-06	Q6NUS6	TCTN3	Cardiometabolic_II
OID30103	Thyrotroph embryonic factor	Sun et al., 2023 (PMID: 37794186)	54219	European (U.K.)	Continuous	2025-05-06	Q10587	TEF	Cardiometabolic_II
OID30480	Telomeric repeat-binding factor 1	Sun et al., 2023 (PMID: 37794186)	54219	European (U.K.)	Continuous	2025-05-06	P54274	TERF1	Inflammation_II
OID30783	Serotransferrin	Sun et al., 2023 (PMID: 37794186)	54219	European (U.K.)	Continuous	2025-05-06	P02787	TF	Inflammation_II
OID30502	TGF-beta receptor type-1	Sun et al., 2023 (PMID: 37794186)	54219	European (U.K.)	Continuous	2025-05-06	P36897	TGFBR1	Inflammation_II
OID30691	Trans-Golgi network integral membrane protein 2	Sun et al., 2023 (PMID: 37794186)	54219	European (U.K.)	Continuous	2025-05-06	O43493	TGOLN2	Inflammation_II
OID30053	Thyroid hormone receptor-associated protein 3	Sun et al., 2023 (PMID: 37794186)	54219	European (U.K.)	Continuous	2025-05-06	Q9Y2W1	THRAP3	Cardiometabolic_II
OID30476	Thrombospondin type-1 domain-containing protein 1	Sun et al., 2023 (PMID: 37794186)	54219	European (U.K.)	Continuous	2025-05-06	Q9NS62	THSD1	Inflammation_II
OID30358	Mitochondrial import inner membrane translocase subunit Tim10	Sun et al., 2023 (PMID: 37794186)	54219	European (U.K.)	Continuous	2025-05-06	P62072	TIMM10	Cardiometabolic_II
OID30318	Metalloproteinase inhibitor 2	Sun et al., 2023 (PMID: 37794186)	54219	European (U.K.)	Continuous	2025-05-06	P16035	TIMP2	Cardiometabolic_II
OID30532	Toll-like receptor 1	Sun et al., 2023 (PMID: 37794186)	54219	European (U.K.)	Continuous	2025-05-06	Q15399	TLR1	Inflammation_II
OID30428	Toll-like receptor 4	Sun et al., 2023 (PMID: 37794186)	54219	European (U.K.)	Continuous	2025-05-06	O00206	TLR4	Inflammation_II
OID30068	Transmembrane emp24 domain-containing protein 10	Sun et al., 2023 (PMID: 37794186)	54219	European (U.K.)	Continuous	2025-05-06	P49755	TMED10	Cardiometabolic_II
OID30154	Transmembrane emp24 domain-containing protein 4	Sun et al., 2023 (PMID: 37794186)	54219	European (U.K.)	Continuous	2025-05-06	Q7Z7H5	TMED4	Cardiometabolic_II
OID30287	Transmembrane protein 132A	Sun et al., 2023 (PMID: 37794186)	54219	European (U.K.)	Continuous	2025-05-06	Q24JP5	TMEM132A	Cardiometabolic_II
OID30629	Tumor necrosis factor alpha-induced protein 8-like protein 2	Sun et al., 2023 (PMID: 37794186)	54219	European (U.K.)	Continuous	2025-05-06	Q6P589	TNFAIP8L2	Inflammation_II
OID30589	Tumor necrosis factor receptor superfamily member 17	Sun et al., 2023 (PMID: 37794186)	54219	European (U.K.)	Continuous	2025-05-06	Q02223	TNFRSF17	Inflammation_II
OID30384	Tumor necrosis factor ligand superfamily member 8	Sun et al., 2023 (PMID: 37794186)	54219	European (U.K.)	Continuous	2025-05-06	P32971	TNFSF8	Cardiometabolic_II
OID30412	Tenascin-N	Sun et al., 2023 (PMID: 37794186)	54219	European (U.K.)	Continuous	2025-05-06	Q9UQP3	TNN	Cardiometabolic_II
OID30353	Mitochondrial import receptor subunit TOM20 homolog	Sun et al., 2023 (PMID: 37794186)	54219	European (U.K.)	Continuous	2025-05-06	Q15388	TOMM20	Cardiometabolic_II
OID30559	DNA topoisomerase 2-beta	Sun et al., 2023 (PMID: 37794186)	54219	European (U.K.)	Continuous	2025-05-06	Q02880	TOP2B	Inflammation_II
OID30195	Torsin-1A-interacting protein 1	Sun et al., 2023 (PMID: 37794186)	54219	European (U.K.)	Continuous	2025-05-06	Q5JTV8	TOR1AIP1	Cardiometabolic_II
OID30470	TP53-binding protein 1	Sun et al., 2023 (PMID: 37794186)	54219	European (U.K.)	Continuous	2025-05-06	Q12888	TP53BP1	Inflammation_II
OID30632	Quinone oxidoreductase PIG3	Sun et al., 2023 (PMID: 37794186)	54219	European (U.K.)	Continuous	2025-05-06	Q53FA7	TP53I3	Inflammation_II
OID30609	Tumor protein D54	Sun et al., 2023 (PMID: 37794186)	54219	European (U.K.)	Continuous	2025-05-06	O43399	TPD52L2	Inflammation_II
OID30338	Thiamin pyrophosphokinase 1	Sun et al., 2023 (PMID: 37794186)	54219	European (U.K.)	Continuous	2025-05-06	Q9H3S4	TPK1	Cardiometabolic_II
OID30058	Tropomyosin alpha-3 chain	Sun et al., 2023 (PMID: 37794186)	54219	European (U.K.)	Continuous	2025-05-06	P06753	TPM3	Cardiometabolic_II
OID30143	Nucleoprotein TPR	Sun et al., 2023 (PMID: 37794186)	54219	European (U.K.)	Continuous	2025-05-06	P12270	TPR	Cardiometabolic_II
OID30424	Tryptase gamma	Sun et al., 2023 (PMID: 37794186)	54219	European (U.K.)	Continuous	2025-05-06	Q9NRR2	TPSG1	Inflammation_II
OID30479	TNF receptor-associated factor 3, Isoform 2	Sun et al., 2023 (PMID: 37794186)	54219	European (U.K.)	Continuous	2025-05-06	Q13114-2	TRAF3	Inflammation_II
OID30054	E3 ubiquitin ligase TRAF3IP2	Sun et al., 2023 (PMID: 37794186)	54219	European (U.K.)	Continuous	2025-05-06	O43734	TRAF3IP2	Cardiometabolic_II
OID30388	Trehalase	Sun et al., 2023 (PMID: 37794186)	54219	European (U.K.)	Continuous	2025-05-06	O43280	TREH	Cardiometabolic_II
OID30682	Trem-like transcript 1 protein	Sun et al., 2023 (PMID: 37794186)	54219	European (U.K.)	Continuous	2025-05-06	Q86YW5	TREML1	Inflammation_II
OID30128	Transient receptor potential cation channel subfamily V member 3	Sun et al., 2023 (PMID: 37794186)	54219	European (U.K.)	Continuous	2025-05-06	Q8NET8	TRPV3	Cardiometabolic_II
OID30478	Hamartin	Sun et al., 2023 (PMID: 37794186)	54219	European (U.K.)	Continuous	2025-05-06	Q92574	TSC1	Inflammation_II
OID30185	Translin-associated protein X	Sun et al., 2023 (PMID: 37794186)	54219	European (U.K.)	Continuous	2025-05-06	Q99598	TSNAX	Cardiometabolic_II
OID30095	Tetraspanin-15	Sun et al., 2023 (PMID: 37794186)	54219	European (U.K.)	Continuous	2025-05-06	O95858	TSPAN15	Cardiometabolic_II
OID30512	Testis-specific Y-encoded-like protein 1	Sun et al., 2023 (PMID: 37794186)	54219	European (U.K.)	Continuous	2025-05-06	Q9H0U9	TSPYL1	Inflammation_II
OID30108	Titin	Sun et al., 2023 (PMID: 37794186)	54219	European (U.K.)	Continuous	2025-05-06	Q8WZ42	TTN	Cardiometabolic_II
OID30782	Transthyretin	Sun et al., 2023 (PMID: 37794186)	54219	European (U.K.)	Continuous	2025-05-06	P02766	TTR	Inflammation_II
OID30386	Twinfilin-2	Sun et al., 2023 (PMID: 37794186)	54219	European (U.K.)	Continuous	2025-05-06	Q6IBS0	TWF2	Cardiometabolic_II
OID30670	Thioredoxin	Sun et al., 2023 (PMID: 37794186)	54219	European (U.K.)	Continuous	2025-05-06	P10599	TXN	Inflammation_II
OID30517	5,6-dihydroxyindole-2-carboxylic acid oxidase	Sun et al., 2023 (PMID: 37794186)	54219	European (U.K.)	Continuous	2025-05-06	P17643	TYRP1	Inflammation_II
OID30321	Ubiquitin/ISG15-conjugating enzyme E2 L6	Sun et al., 2023 (PMID: 37794186)	54219	European (U.K.)	Continuous	2025-05-06	O14933	UBE2L6	Cardiometabolic_II
OID30427	Ubiquitin-conjugating enzyme E2 Z	Sun et al., 2023 (PMID: 37794186)	54219	European (U.K.)	Continuous	2025-05-06	Q9H832	UBE2Z	Inflammation_II
OID30096	Ubiquilin-3	Sun et al., 2023 (PMID: 37794186)	54219	European (U.K.)	Continuous	2025-05-06	Q9H347	UBQLN3	Cardiometabolic_II
OID30654	UBX domain-containing protein 1	Sun et al., 2023 (PMID: 37794186)	54219	European (U.K.)	Continuous	2025-05-06	Q04323	UBXN1	Inflammation_II
OID30081	UDP-glucose 6-dehydrogenase	Sun et al., 2023 (PMID: 37794186)	54219	European (U.K.)	Continuous	2025-05-06	O60701	UGDH	Cardiometabolic_II
OID30171	E3 ubiquitin-protein ligase UHRF2	Sun et al., 2023 (PMID: 37794186)	54219	European (U.K.)	Continuous	2025-05-06	Q96PU4	UHRF2	Cardiometabolic_II
OID30447	Netrin receptor UNC5D	Sun et al., 2023 (PMID: 37794186)	54219	European (U.K.)	Continuous	2025-05-06	Q6UXZ4	UNC5D	Inflammation_II
OID30352	Beta-ureidopropionase	Sun et al., 2023 (PMID: 37794186)	54219	European (U.K.)	Continuous	2025-05-06	Q9UBR1	UPB1	Cardiometabolic_II
OID30603	Uroporphyrinogen decarboxylase	Sun et al., 2023 (PMID: 37794186)	54219	European (U.K.)	Continuous	2025-05-06	P06132	UROD	Inflammation_II
OID30119	Ubiquitin carboxyl-terminal hydrolase 47	Sun et al., 2023 (PMID: 37794186)	54219	European (U.K.)	Continuous	2025-05-06	Q96K76	USP47	Cardiometabolic_II
OID30555	Vesicle-associated membrane protein 8	Sun et al., 2023 (PMID: 37794186)	54219	European (U.K.)	Continuous	2025-05-06	Q9BV40	VAMP8	Inflammation_II
OID30692	Vasodilator-stimulated phosphoprotein	Sun et al., 2023 (PMID: 37794186)	54219	European (U.K.)	Continuous	2025-05-06	P50552	VASP	Inflammation_II
OID30554	Vascular endothelial growth factor B	Sun et al., 2023 (PMID: 37794186)	54219	European (U.K.)	Continuous	2025-05-06	P49765	VEGFB	Inflammation_II
OID30193	Vasoactive intestinal polypeptide receptor 1	Sun et al., 2023 (PMID: 37794186)	54219	European (U.K.)	Continuous	2025-05-06	P32241	VIPR1	Cardiometabolic_II
OID30334	Vitrin	Sun et al., 2023 (PMID: 37794186)	54219	European (U.K.)	Continuous	2025-05-06	Q6UXI7	VIT	Cardiometabolic_II
OID30711	Pantetheinase	Sun et al., 2023 (PMID: 37794186)	54219	European (U.K.)	Continuous	2025-05-06	O95497	VNN1	Inflammation_II
OID30189	V-set and immunoglobulin domain-containing protein 10-like	Sun et al., 2023 (PMID: 37794186)	54219	European (U.K.)	Continuous	2025-05-06	Q86VR7	VSIG10L	Cardiometabolic_II
OID30640	Vesicle transport through interaction with t-SNAREs homolog 1A	Sun et al., 2023 (PMID: 37794186)	54219	European (U.K.)	Continuous	2025-05-06	Q96AJ9	VTI1A	Inflammation_II
OID30467	Neural Wiskott-Aldrich syndrome protein	Sun et al., 2023 (PMID: 37794186)	54219	European (U.K.)	Continuous	2025-05-06	O00401	WASL	Inflammation_II
OID30490	E3 ubiquitin-protein ligase XIAP	Sun et al., 2023 (PMID: 37794186)	54219	European (U.K.)	Continuous	2025-05-06	P98170	XIAP	Inflammation_II
OID30181	Ubiquitin thioesterase OTU1	Sun et al., 2023 (PMID: 37794186)	54219	European (U.K.)	Continuous	2025-05-06	Q5VVQ6	YOD1	Cardiometabolic_II
OID30605	14-3-3 protein theta	Sun et al., 2023 (PMID: 37794186)	54219	European (U.K.)	Continuous	2025-05-06	P27348	YWHAQ	Inflammation_II
OID30446	Transcriptional repressor protein YY1	Sun et al., 2023 (PMID: 37794186)	54219	European (U.K.)	Continuous	2025-05-06	P25490	YY1	Inflammation_II
OID30526	Z-DNA-binding protein 1	Sun et al., 2023 (PMID: 37794186)	54219	European (U.K.)	Continuous	2025-05-06	Q9H171	ZBP1	Inflammation_II
OID30117	Zinc finger CCHC domain-containing protein 8	Sun et al., 2023 (PMID: 37794186)	54219	European (U.K.)	Continuous	2025-05-06	Q6NZY4	ZCCHC8	Cardiometabolic_II
OID30508	Zinc finger protein 174	Sun et al., 2023 (PMID: 37794186)	54219	European (U.K.)	Continuous	2025-05-06	Q15697	ZNF174	Inflammation_II
OID30265	Zona pellucida sperm-binding protein 3	Sun et al., 2023 (PMID: 37794186)	54219	European (U.K.)	Continuous	2025-05-06	P21754	ZP3	Cardiometabolic_II

## Sheet: Supplementary Table 1C
Legend: list of traits used for replication analyses. AMD, IL-15Ralpha, TRAIL and TNFSF12 as outcomes and s__Bifidobacterium_adolescentis as exposure.
Study accession	Trait	Data article	Sample size	Population	Definition of the disease (ICD-9-CM or type of trait)	Download date
	Age-related macular degeneration (AMD)
GCST90086112	AMD	Guindo-Martinez et al., 2021 (PMID: 33893285)	56637: 3685 cases and 52952 controls	European ancestry (U.S.)	362.5, 362.50, 362.51, 362.52, 362.57	2024-05-23
GCST010723	Early AMD	Winkler et al., 2020 (PMID: 32843070)	105248: 14034 cases and 91214 controls	European ancestry	Based on clinical evaluation according the Three Continent Consortium Severity Scale	2024-05-23
Finngen study - https://console.cloud.google.com/storage/browser/finngen-public-data-r11/summary_stats;tab=objects?prefix=&forceOnObjectsSortingFiltering=false&pli=1&inv=1&invt=AbkRKw	AMD	Kurki et al., 2023 (PMID: 36653562)	430221: 11023 cases and 419198 controls	European ancestry (Finnish)	362.51 & 362.52	2024-07-12
	Inflammatory and Cardiometabolic proteins
	Inflammatory proteins	Zhao et al., 2023 (PMID: 37563310)	14824	European ancestry	Continuous trait	2024-05-23
	Inflammatory and cardiometabolic proteins	Folkersen et al., 2020 (PMID: 33067605)	21758	European ancestry	Continuous trait	2025-05-15
	Inflammatory and cardiometabolic proteins	Sun et al., 2018 (PMID: 29875488)	3622	European ancestry	Continuous trait	2025-05-15
Accession for each replication GWAS:
Name	Assay	Sun et al, 2018	Folkersen et al, 2020	Zhao et al, 2023
1-phosphatidylinositol 3-phosphate 5-kinase	PIKFYVE
2,4-dienoyl-CoA reductase, mitochondrial	DECR1
Aflatoxin B1 aldehyde reductase member 4	AKR7L
Alpha-1-antichymotrypsin	SERPINA3
Angiomotin	AMOT
Angiotensin-converting enzyme 2	ACE2	GCST90240292
Apolipoprotein M	APOM	GCST90240318
B-cell differentiation antigen CD72	CD72
Carcinoembryonic antigen-related cell adhesion molecule 21	CEACAM21	GCST90240601
CD276 antigen	CD276
CD5 antigen-like	CD5L
CMRF35-like molecule 8	CD300A	GCST90240722
Complement component C7	C7
C-X-C motif chemokine 10	CXCL10	GCST90240520		GCST90274780
C-X-C motif chemokine 9	CXCL9	GCST90240526 or GCST90240527		GCST90274784
Delta and Notch-like epidermal growth factor-related receptor	DNER	GCST90240881 or GCST90240882		GCST90274785
Dystrophin	DMD
Epithelial cell adhesion molecule	EPCAM
FERM domain-containing protein 4B	FRMD4B
Fructose-1,6-bisphosphatase 1	FBP1	GCST90241206
Gastric triacylglycerol lipase	LIPF	GCST90241241
GMP reductase 1	GMPR
Inactive ribonuclease-like protein 10	RNASE10	GCST90241489
Integrin beta-6	ITGB6
Intercellular adhesion molecule 2	ICAM2	GCST90241538
Interleukin-17C	IL17C	GCST90241604		GCST90274802
Interleukin-4 receptor subunit alpha	IL4R	GCST90241640
Interleukin-5 receptor subunit alpha	IL5RA	GCST90241643 or GCST90241644
Interleukin-6 receptor subunit alpha	IL6R	GCST90241647 or GCST90241648	GCST90012025
Latent-transforming growth factor beta-binding protein 2	LTBP2
Lon protease homolog, mitochondrial	LONP1	GCST90241811
Lymphocyte antigen 6D	LY6D
Lymphotoxin-alpha	LTA	GCST90241838
Macrophage colony-stimulating factor 1	CSF1	GCST90241854	GCST90012018	GCST90274776
Macrophage receptor MARCO	MARCO
Malate dehydrogenase, cytoplasmic	MDH1	GCST90241865
Melanotransferrin	MELTF
Microtubule-associated proteins 1A/1B light chain 3 beta 2	MAP1LC3B2
NAD-dependent protein deacetylase sirtuin-1	SIRT1
Nephrin	NPHS1
Nucleoprotein TPR	TPR
Osteoclast-associated immunoglobulin-like receptor	OSCAR	GCST90242176
Platelet glycoprotein Ib alpha chain	GP1BA	GCST90242284
Platelet-derived growth factor receptor alpha	PDGFRA	GCST90242290
Pulmonary surfactant-associated protein D	SFTPD	GCST90242558
REST corepressor 1	RCOR1
Scavenger receptor cysteine-rich type 1 protein M130	CD163	GCST90242721
Serotransferrin	TF	GCST90242791
Sialic acid-binding Ig-like lectin 7	SIGLEC7	GCST90242811
Sialic acid-binding Ig-like lectin 8	SIGLEC8	GCST90242812
Sprouty-related, EVH1 domain-containing protein 2	SPRED2
T-cell surface glycoprotein CD3 gamma chain	CD3G	GCST90242959
T-cell surface glycoprotein CD4	CD4	GCST90242960
Tetranectin	CLEC3B
Thioredoxin-dependent peroxide reductase, mitochondrial	PRDX3
Transferrin receptor protein 1	TFRC	GCST90243053 or GCST90243054
Triggering receptor expressed on myeloid cells 2	TREM2
Tumor necrosis factor ligand superfamily member 10	TNFSF10		GCST90012011	GCST90274843
Tumor necrosis factor ligand superfamily member 13	TNFSF13
Tyrosine-protein phosphatase non-receptor type substrate 1	SIRPA	GCST90243222
Vasorin	VASN
Zona pellucida sperm-binding protein 3	ZP3

## Sheet: Supplementary Table 1D
Legend: list of Structural variants (SV) of Faecalibacterium Prausnitzii (F. praus) related to GalNAc used for the additional analysis for TRAIL protein: deletion SV (dSV) TRAIL: TNF-related aptosis-inducing ligand level
SV name	Type of variant	Link for download	Data article	Download date
F. praus KLE1255: 577_579	dSV	https://plus.figshare.com/articles/dataset/GWAS_summary_statistics_for_gut_bacterial_deletion_structural_variation/24278671?backTo=%2Fcollections%2FHost_Genetic_Regulation_of_Human_Gut_Microbial_Structural_Variation%2F6877849&file=42649039	Zhernakova et al., 2024 (PMID: 38172637)	2024-12-13
