# Supplementary material for: Causal relationships between gut microbiome and hundreds of age-related traits: evidence of a replicable effect on ApoM protein levels
Source: Aging (Albany NY). 2025 Aug 1;17(8):1966–87. doi: 10.18632/aging.206293 (PMC12422825; doi:10.18632/aging.206293)
Supplement: Supplementary Table 2 [file aging-17-8-206293-s003.xlsx]

## Sheet: Outline
What you can find in this file
Supplementary Table 2. Detailed MR results for all analyses carried out in this study. This Excel table contains 18 sheets. The first table (A) contains the List of microbiome traits showing at least one association at p-value < 5 × 10−8 that were used as exposures in this work. The following sheets contain detailed MR results, specifically: (B) results when using age-related macular degeneration…

## Sheet: a.MicrobiomeGWAS
Legend: This table lists microbiome traits (taxa or pathways) with number of variants after clumping with p<5x10-6. The explained variance and F-statistic were calculated and reported here with the corresponding he Study Accession number in GWAS Catalog. (exp_var: explained variance (by the instument); F_stat: F-statistic (>10 good instrument); GWAS: genome-wide association study, nsnps: number o…
Study accession	exposure	exp_var (R^2)	F_stat	nsnps
Taxa
GCST90027651	k__Bacteria.p__Actinobacteria.c__Actinobacteria	0.0283081	32.1709	7
GCST90027656	k__Bacteria.p__Firmicutes.c__Negativicutes	0.0152198	29.8783	4
GCST90027662	k__Bacteria.p__Actinobacteria.c__Actinobacteria.o__Bifidobacteriales.f__Bifidobacteriaceae	0.0223947	35.4244	5
GCST90027663	k__Bacteria.p__Actinobacteria.c__Actinobacteria.o__Coriobacteriales.f__Coriobacteriaceae	0.0185898	29.2918	5
GCST90027668	k__Bacteria.p__Bacteroidetes.c__Bacteroidia.o__Bacteroidales.f__Rikenellaceae	0.00962303	37.5787	2
GCST90027688	k__Bacteria.p__Actinobacteria.c__Actinobacteria.o__Bifidobacteriales.f__Bifidobacteriaceae.g__Bifidobacterium	0.021856	34.5533	5
GCST90027690	k__Bacteria.p__Actinobacteria.c__Actinobacteria.o__Coriobacteriales.f__Coriobacteriaceae.g__Collinsella	0.013816	36.1165	3
GCST90027701	k__Bacteria.p__Bacteroidetes.c__Bacteroidia.o__Bacteroidales.f__Rikenellaceae.g__Alistipes	0.00966808	37.7563	2
GCST90027736	k__Bacteria.p__Actinobacteria.c__Actinobacteria.o__Bifidobacteriales	0.0223917	35.4196	5
GCST90027737	k__Bacteria.p__Actinobacteria.c__Actinobacteria.o__Coriobacteriales	0.0185913	29.2941	5
GCST90027742	k__Bacteria.p__Firmicutes.c__Negativicutes.o__Selenomonadales	0.0152191	29.8769	4
GCST90027748	k__Bacteria.p__Actinobacteria	0.0283085	32.1715	7
GCST90027754	k__Bacteria.p__Actinobacteria.c__Actinobacteria.o__Bifidobacteriales.f__Bifidobacteriaceae.g__Bifidobacterium.s__Bifidobacterium_adolescentis	0.0270954	30.7544	7
GCST90027755	k__Bacteria.p__Actinobacteria.c__Actinobacteria.o__Bifidobacteriales.f__Bifidobacteriaceae.g__Bifidobacterium.s__Bifidobacterium_bifidum	0.0390151	28.5153	11
GCST90027757	k__Bacteria.p__Actinobacteria.c__Actinobacteria.o__Bifidobacteriales.f__Bifidobacteriaceae.g__Bifidobacterium.s__Bifidobacterium_longum	0.0186603	29.405	5
GCST90027759	k__Bacteria.p__Actinobacteria.c__Actinobacteria.o__Coriobacteriales.f__Coriobacteriaceae.g__Collinsella.s__Collinsella_aerofaciens	0.0100778	39.3728	2
GCST90027781	k__Bacteria.p__Bacteroidetes.c__Bacteroidia.o__Bacteroidales.f__Rikenellaceae.g__Alistipes.s__Alistipes_sp_AP11	0.0127087	33.1847	3
GCST90027817	k__Bacteria.p__Proteobacteria.c__Gammaproteobacteria.o__Enterobacteriales.f__Enterobacteriaceae.g__Escherichia.s__Escherichia_unclassified	0.0190732	30.0684	5
Pathways
GCST90027451	ASPASN.PWY..superpathway.of.L.aspartate.and.L.asparagine.biosynthesis	0.0156046	30.6457	4
GCST90027463	ENTBACSYN.PWY..enterobactin.biosynthesis	0.00721052	56.1857	1
GCST90027475	GLYCOCAT.PWY..glycogen.degradation.I..bacterial.	0.0156594	30.7552	4
GCST90027481	HISDEG.PWY..L.histidine.degradation.I	0.0244025	27.6213	7
GCST90027482	HISTSYN.PWY..L.histidine.biosynthesis	0.0151187	29.6768	4
GCST90027488	LACTOSECAT.PWY..lactose.and.galactose.degradation.I	0.0315041	31.427	8
GCST90027494	P105.PWY..TCA.cycle.IV..2.oxoglutarate.decarboxylase.	0.0100907	39.4237	2
GCST90027538	PWY.5088..L.glutamate.degradation.VIII..to.propanoate.	0.0127186	33.2109	3
GCST90027571	PWY.6147..6.hydroxymethyl.dihydropterin.diphosphate.biosynthesis.I	0.0236891	26.7943	7
GCST90027572	PWY.6151..S.adenosyl.L.methionine.cycle.I	0.0285803	28.4246	8
GCST90027579	PWY.6353..purine.nucleotides.degradation.II..aerobic.	0.0270829	26.8938	8
GCST90027588	PWY.6612..superpathway.of.tetrahydrofolate.biosynthesis	0.0308842	27.3643	9
GCST90027596	PWY.6708..ubiquinol.8.biosynthesis..prokaryotic.	0.0181723	28.6217	5
GCST90027612	PWY.7209..superpathway.of.pyrimidine.ribonucleosides.degradation	0.0300734	26.6237	9
GCST90027616	PWY.7234..inosine.5..phosphate.biosynthesis.III	0.0227879	30.0469	6
GCST90027628	PWY.841..superpathway.of.purine.nucleotides.de.novo.biosynthesis.I	0.0153902	30.2182	4
GCST90027635	PWY_REDCITCYC..TCA.cycle.VIII..helicobacter.	0.0214231	28.208	6
GCST90027638	PYRIDNUCSYN.PWY..NAD.biosynthesis.I..from.aspartate.	0.0298185	26.3911	9
GCST90027647	TRPSYN.PWY..L.tryptophan.biosynthesis	0.0189662	29.8963	5

## Sheet: b.MR_AMD
Legend: This table lists MR results when using AMD as outcome. For taxa and pathways tested, we show the results of IVW, WM, MR-PRESSO tests. MR-Egger was run to derive the intercept for evaluating pleiotropy, but for completeness also the causal estimate is reported. For IVW, the Cochran's Q test results are also shown. The pval_adj column reports the IVW adjusted pvalue after multiple testing. …
exposure	outcome	method	nsnp	beta_c	se	pval	egger_intercept.ple	se.ple	pval.ple	Q.het	Q_df.het	Q_pval.het	pval_adj	IV_list
k__Bacteria.p__Actinobacteria.c__Actinobacteria.o__Coriobacteriales	AMD	MR Egger	6	1.70259	1.28404	0.255502	-0.107727	0.125107	0.43775					rs11652058; rs28806584; rs2907732; rs4234207; rs550057; rs78362376
k__Bacteria.p__Actinobacteria.c__Actinobacteria.o__Coriobacteriales	AMD	Inverse variance weighted	6	0.610824	0.202906	0.00260923				2.67097	5	0.750554	0.0482708	rs11652058; rs28806584; rs2907732; rs4234207; rs550057; rs78362376
k__Bacteria.p__Actinobacteria.c__Actinobacteria.o__Coriobacteriales	AMD	Weighted median	6	0.678695	0.266636	0.0109153								rs11652058; rs28806584; rs2907732; rs4234207; rs550057; rs78362376
k__Bacteria.p__Actinobacteria.c__Actinobacteria.o__Coriobacteriales	AMD	MR-PRESSO	6	0.610824	0.148301	0.00918462								rs11652058; rs28806584; rs2907732; rs4234207; rs550057; rs78362376
k__Bacteria.p__Actinobacteria.c__Actinobacteria.o__Coriobacteriales.f__Coriobacteriaceae	AMD	MR Egger	6	1.70246	1.28325	0.255287	-0.107705	0.125025	0.437561					rs11652058; rs28806584; rs2907732; rs4234207; rs550057; rs78362376
k__Bacteria.p__Actinobacteria.c__Actinobacteria.o__Coriobacteriales.f__Coriobacteriaceae	AMD	Inverse variance weighted	6	0.61089	0.202914	0.00260749				2.66975	5	0.750741	0.0482708	rs11652058; rs28806584; rs2907732; rs4234207; rs550057; rs78362376
k__Bacteria.p__Actinobacteria.c__Actinobacteria.o__Coriobacteriales.f__Coriobacteriaceae	AMD	Weighted median	6	0.678722	0.25885	0.00873996								rs11652058; rs28806584; rs2907732; rs4234207; rs550057; rs78362376
k__Bacteria.p__Actinobacteria.c__Actinobacteria.o__Coriobacteriales.f__Coriobacteriaceae	AMD	MR-PRESSO	6	0.61089	0.148273	0.0091737								rs11652058; rs28806584; rs2907732; rs4234207; rs550057; rs78362376
k__Bacteria.p__Actinobacteria.c__Actinobacteria.o__Bifidobacteriales.f__Bifidobacteriaceae.g__Bifidobacterium.s__Bifidobacterium_adolescentis	AMD	MR Egger	8	0.370364	0.572649	0.541725	-0.00839599	0.0639296	0.899806					rs11986537; rs4110696; rs4256405; rs4351047; rs4646215; rs6754311; rs74394156; rs8045380
k__Bacteria.p__Actinobacteria.c__Actinobacteria.o__Bifidobacteriales.f__Bifidobacteriaceae.g__Bifidobacterium.s__Bifidobacterium_adolescentis	AMD	Inverse variance weighted	8	0.297773	0.149716	0.04671				1.58877	7	0.979076	0.57609	rs11986537; rs4110696; rs4256405; rs4351047; rs4646215; rs6754311; rs74394156; rs8045380
k__Bacteria.p__Actinobacteria.c__Actinobacteria.o__Bifidobacteriales.f__Bifidobacteriaceae.g__Bifidobacterium.s__Bifidobacterium_adolescentis	AMD	Weighted median	8	0.315376	0.188144	0.0936889								rs11986537; rs4110696; rs4256405; rs4351047; rs4646215; rs6754311; rs74394156; rs8045380
k__Bacteria.p__Actinobacteria.c__Actinobacteria.o__Bifidobacteriales.f__Bifidobacteriaceae.g__Bifidobacterium.s__Bifidobacterium_adolescentis	AMD	MR-PRESSO	8	0.297773	0.0713263	0.00416417								rs11986537; rs4110696; rs4256405; rs4351047; rs4646215; rs6754311; rs74394156; rs8045380
GLYCOCAT.PWY..glycogen.degradation.I..bacterial.	AMD	MR Egger	5	1.05943	0.913695	0.330154	-0.084076	0.103765	0.477102					rs115001375; rs2056101; rs35296932; rs41474647; rs59657730
GLYCOCAT.PWY..glycogen.degradation.I..bacterial.	AMD	Inverse variance weighted	5	0.334882	0.187611	0.0742643				2.49788	4	0.645015	0.657189	rs115001375; rs2056101; rs35296932; rs41474647; rs59657730
GLYCOCAT.PWY..glycogen.degradation.I..bacterial.	AMD	Weighted median	5	0.318944	0.254341	0.20984								rs115001375; rs2056101; rs35296932; rs41474647; rs59657730
GLYCOCAT.PWY..glycogen.degradation.I..bacterial.	AMD	MR-PRESSO	5	0.334882	0.148257	0.0867957								rs115001375; rs2056101; rs35296932; rs41474647; rs59657730
PWY.6147..6.hydroxymethyl.dihydropterin.diphosphate.biosynthesis.I	AMD	MR Egger	7	1.52427	1.35759	0.312533	-0.109139	0.121494	0.41019					rs10792007; rs11732083; rs1366290; rs1940600; rs2548882; rs2714053; rs73401412
PWY.6147..6.hydroxymethyl.dihydropterin.diphosphate.biosynthesis.I	AMD	Inverse variance weighted	7	0.316215	0.185822	0.0888093				3.17951	6	0.786003	0.657189	rs10792007; rs11732083; rs1366290; rs1940600; rs2548882; rs2714053; rs73401412
PWY.6147..6.hydroxymethyl.dihydropterin.diphosphate.biosynthesis.I	AMD	Weighted median	7	0.286334	0.239167	0.231223								rs10792007; rs11732083; rs1366290; rs1940600; rs2548882; rs2714053; rs73401412
PWY.6147..6.hydroxymethyl.dihydropterin.diphosphate.biosynthesis.I	AMD	MR-PRESSO	7	0.164816	0.205566	0.449044								rs10792007; rs11732083; rs1366290; rs1940600; rs2548882; rs2714053; rs73401412
HISTSYN.PWY..L.histidine.biosynthesis	AMD	MR Egger	5	0.516282	0.834057	0.579742	-0.0125454	0.103699	0.911356					rs10005886; rs10772275; rs12098656; rs7145596; rs78778914
HISTSYN.PWY..L.histidine.biosynthesis	AMD	Inverse variance weighted	5	0.422545	0.268007	0.114883				5.50365	4	0.239409	0.708445	rs10005886; rs10772275; rs12098656; rs7145596; rs78778914
HISTSYN.PWY..L.histidine.biosynthesis	AMD	Weighted median	5	0.247711	0.306625	0.419168								rs10005886; rs10772275; rs12098656; rs7145596; rs78778914
HISTSYN.PWY..L.histidine.biosynthesis	AMD	MR-PRESSO	5	0.422545	0.268007	0.190013								rs10005886; rs10772275; rs12098656; rs7145596; rs78778914
ASPASN.PWY..superpathway.of.L.aspartate.and.L.asparagine.biosynthesis	AMD	MR Egger	3	-1.43424	2.84874	0.703071	0.159205	0.25835	0.648413					rs113902391; rs2846765; rs9545502
ASPASN.PWY..superpathway.of.L.aspartate.and.L.asparagine.biosynthesis	AMD	Inverse variance weighted	3	0.312354	0.286552	0.275694				0.469472	2	0.79078	0.76114	rs113902391; rs2846765; rs9545502
ASPASN.PWY..superpathway.of.L.aspartate.and.L.asparagine.biosynthesis	AMD	Weighted median	3	0.383299	0.355012	0.280285								rs113902391; rs2846765; rs9545502
ASPASN.PWY..superpathway.of.L.aspartate.and.L.asparagine.biosynthesis	AMD	MR-PRESSO	3											rs113902391; rs2846765; rs9545502
ENTBACSYN.PWY..enterobactin.biosynthesis	AMD	Wald ratio	1	-0.258073	0.23309	0.268216							0.76114	rs706111
ENTBACSYN.PWY..enterobactin.biosynthesis	AMD	MR-PRESSO	1											rs706111
k__Bacteria.p__Bacteroidetes.c__Bacteroidia.o__Bacteroidales.f__Rikenellaceae	AMD	MR Egger	3	0.349683	1.09665	0.803493	-0.0897179	0.137333	0.631599					rs11211406; rs2465506; rs73344869
k__Bacteria.p__Bacteroidetes.c__Bacteroidia.o__Bacteroidales.f__Rikenellaceae	AMD	Inverse variance weighted	3	-0.340563	0.29376	0.246323				0.506231	2	0.776378	0.76114	rs11211406; rs2465506; rs73344869
k__Bacteria.p__Bacteroidetes.c__Bacteroidia.o__Bacteroidales.f__Rikenellaceae	AMD	Weighted median	3	-0.346111	0.36062	0.337173								rs11211406; rs2465506; rs73344869
k__Bacteria.p__Bacteroidetes.c__Bacteroidia.o__Bacteroidales.f__Rikenellaceae	AMD	MR-PRESSO	3											rs11211406; rs2465506; rs73344869
k__Bacteria.p__Bacteroidetes.c__Bacteroidia.o__Bacteroidales.f__Rikenellaceae.g__Alistipes	AMD	MR Egger	3	0.34716	1.09739	0.804947	-0.0895446	0.137818	0.633189					rs11211406; rs2465506; rs73344869
k__Bacteria.p__Bacteroidetes.c__Bacteroidia.o__Bacteroidales.f__Rikenellaceae.g__Alistipes	AMD	Inverse variance weighted	3	-0.339977	0.292923	0.24579				0.503193	2	0.777558	0.76114	rs11211406; rs2465506; rs73344869
k__Bacteria.p__Bacteroidetes.c__Bacteroidia.o__Bacteroidales.f__Rikenellaceae.g__Alistipes	AMD	Weighted median	3	-0.345397	0.345867	0.317969								rs11211406; rs2465506; rs73344869
k__Bacteria.p__Bacteroidetes.c__Bacteroidia.o__Bacteroidales.f__Rikenellaceae.g__Alistipes	AMD	MR-PRESSO	3											rs11211406; rs2465506; rs73344869
k__Bacteria.p__Firmicutes.c__Negativicutes	AMD	MR Egger	4	0.618717	0.957189	0.584298	-0.11518	0.120937	0.441413					rs12472147; rs12979658; rs77764206; rs78791321
k__Bacteria.p__Firmicutes.c__Negativicutes	AMD	Inverse variance weighted	4	-0.262111	0.246688	0.287999				2.59894	3	0.457675	0.76114	rs12472147; rs12979658; rs77764206; rs78791321
k__Bacteria.p__Firmicutes.c__Negativicutes	AMD	Weighted median	4	-0.151204	0.303224	0.618023								rs12472147; rs12979658; rs77764206; rs78791321
k__Bacteria.p__Firmicutes.c__Negativicutes	AMD	MR-PRESSO	4	-0.262111	0.229607	0.336502								rs12472147; rs12979658; rs77764206; rs78791321
k__Bacteria.p__Firmicutes.c__Negativicutes.o__Selenomonadales	AMD	MR Egger	4	0.618734	0.957249	0.58431	-0.115181	0.120943	0.441427					rs12472147; rs12979658; rs77764206; rs78791321
k__Bacteria.p__Firmicutes.c__Negativicutes.o__Selenomonadales	AMD	Inverse variance weighted	4	-0.26212	0.246692	0.287991				2.59891	3	0.457681	0.76114	rs12472147; rs12979658; rs77764206; rs78791321
k__Bacteria.p__Firmicutes.c__Negativicutes.o__Selenomonadales	AMD	Weighted median	4	-0.151216	0.305546	0.620667								rs12472147; rs12979658; rs77764206; rs78791321
k__Bacteria.p__Firmicutes.c__Negativicutes.o__Selenomonadales	AMD	MR-PRESSO	4	-0.26212	0.229609	0.336493								rs12472147; rs12979658; rs77764206; rs78791321
PWY.6612..superpathway.of.tetrahydrofolate.biosynthesis	AMD	MR Egger	8	-0.195894	0.752619	0.803347	0.0483105	0.0909303	0.6143					rs1027949; rs10815601; rs1573442; rs17155574; rs17824268; rs2214921; rs4833077; rs6673038
PWY.6612..superpathway.of.tetrahydrofolate.biosynthesis	AMD	Inverse variance weighted	8	0.194348	0.15544	0.211187				8.40994	7	0.297837	0.76114	rs1027949; rs10815601; rs1573442; rs17155574; rs17824268; rs2214921; rs4833077; rs6673038
PWY.6612..superpathway.of.tetrahydrofolate.biosynthesis	AMD	Weighted median	8	0.345693	0.187607	0.0653803								rs1027949; rs10815601; rs1573442; rs17155574; rs17824268; rs2214921; rs4833077; rs6673038
PWY.6612..superpathway.of.tetrahydrofolate.biosynthesis	AMD	MR-PRESSO	8	0.194348	0.15544	0.251362								rs1027949; rs10815601; rs1573442; rs17155574; rs17824268; rs2214921; rs4833077; rs6673038
TRPSYN.PWY..L.tryptophan.biosynthesis	AMD	MR Egger	4	-0.423216	0.828276	0.660196	0.0156453	0.0908152	0.879076					rs17399145; rs1990421; rs2935713; rs62241211
TRPSYN.PWY..L.tryptophan.biosynthesis	AMD	Inverse variance weighted	4	-0.287512	0.256032	0.261456				1.76833	3	0.621851	0.76114	rs17399145; rs1990421; rs2935713; rs62241211
TRPSYN.PWY..L.tryptophan.biosynthesis	AMD	Weighted median	4	-0.178061	0.311515	0.567595								rs17399145; rs1990421; rs2935713; rs62241211
TRPSYN.PWY..L.tryptophan.biosynthesis	AMD	MR-PRESSO	4	-0.287512	0.196569	0.239742								rs17399145; rs1990421; rs2935713; rs62241211
HISDEG.PWY..L.histidine.degradation.I	AMD	MR Egger	5	0.108513	1.04991	0.924203	-0.0318221	0.102488	0.776506					rs11948304; rs12137024; rs1501270; rs2175835; rs6783574
HISDEG.PWY..L.histidine.degradation.I	AMD	Inverse variance weighted	5	-0.210301	0.219118	0.337176				0.500897	4	0.973414	0.807668	rs11948304; rs12137024; rs1501270; rs2175835; rs6783574
HISDEG.PWY..L.histidine.degradation.I	AMD	Weighted median	5	-0.173488	0.247311	0.482994								rs11948304; rs12137024; rs1501270; rs2175835; rs6783574
HISDEG.PWY..L.histidine.degradation.I	AMD	MR-PRESSO	5	-0.314099	0.121794	0.0494967								rs11948304; rs12137024; rs1501270; rs2175835; rs6783574
k__Bacteria.p__Actinobacteria.c__Actinobacteria.o__Bifidobacteriales.f__Bifidobacteriaceae.g__Bifidobacterium	AMD	MR Egger	6	-0.00941322	0.591089	0.988057	0.0212718	0.0668654	0.766304					rs10455532; rs12657170; rs182549; rs4472164; rs4859454; rs74452406
k__Bacteria.p__Actinobacteria.c__Actinobacteria.o__Bifidobacteriales.f__Bifidobacteriaceae.g__Bifidobacterium	AMD	Inverse variance weighted	6	0.169579	0.18117	0.349262				1.34238	5	0.930511	0.807668	rs10455532; rs12657170; rs182549; rs4472164; rs4859454; rs74452406
k__Bacteria.p__Actinobacteria.c__Actinobacteria.o__Bifidobacteriales.f__Bifidobacteriaceae.g__Bifidobacterium	AMD	Weighted median	6	0.269959	0.22638	0.233063								rs10455532; rs12657170; rs182549; rs4472164; rs4859454; rs74452406
k__Bacteria.p__Actinobacteria.c__Actinobacteria.o__Bifidobacteriales.f__Bifidobacteriaceae.g__Bifidobacterium	AMD	MR-PRESSO	6	0.169579	0.0938724	0.130662								rs10455532; rs12657170; rs182549; rs4472164; rs4859454; rs74452406
k__Bacteria.p__Actinobacteria.c__Actinobacteria.o__Bifidobacteriales	AMD	MR Egger	6	0.307275	0.619655	0.645988	-0.0269458	0.0671701	0.70881					rs10455532; rs12657170; rs182549; rs4851317; rs4859454; rs74452406
k__Bacteria.p__Actinobacteria.c__Actinobacteria.o__Bifidobacteriales	AMD	Inverse variance weighted	6	0.0711951	0.178792	0.690483				4.90003	5	0.428202	0.912521	rs10455532; rs12657170; rs182549; rs4851317; rs4859454; rs74452406
k__Bacteria.p__Actinobacteria.c__Actinobacteria.o__Bifidobacteriales	AMD	Weighted median	6	0.26929	0.231512	0.244757								rs10455532; rs12657170; rs182549; rs4851317; rs4859454; rs74452406
k__Bacteria.p__Actinobacteria.c__Actinobacteria.o__Bifidobacteriales	AMD	MR-PRESSO	6	0.0711951	0.176996	0.704126								rs10455532; rs12657170; rs182549; rs4851317; rs4859454; rs74452406
k__Bacteria.p__Actinobacteria.c__Actinobacteria.o__Bifidobacteriales.f__Bifidobacteriaceae	AMD	MR Egger	6	0.306802	0.619357	0.646328	-0.0268976	0.0671422	0.709185					rs10455532; rs12657170; rs182549; rs4851317; rs4859454; rs74452406
k__Bacteria.p__Actinobacteria.c__Actinobacteria.o__Bifidobacteriales.f__Bifidobacteriaceae	AMD	Inverse variance weighted	6	0.0711725	0.178781	0.690556				4.90011	5	0.428193	0.912521	rs10455532; rs12657170; rs182549; rs4851317; rs4859454; rs74452406
k__Bacteria.p__Actinobacteria.c__Actinobacteria.o__Bifidobacteriales.f__Bifidobacteriaceae	AMD	Weighted median	6	0.269347	0.229692	0.240938								rs10455532; rs12657170; rs182549; rs4851317; rs4859454; rs74452406
k__Bacteria.p__Actinobacteria.c__Actinobacteria.o__Bifidobacteriales.f__Bifidobacteriaceae	AMD	MR-PRESSO	6	0.0711725	0.176986	0.704197								rs10455532; rs12657170; rs182549; rs4851317; rs4859454; rs74452406
k__Bacteria.p__Actinobacteria.c__Actinobacteria.o__Bifidobacteriales.f__Bifidobacteriaceae.g__Bifidobacterium.s__Bifidobacterium_bifidum	AMD	MR Egger	10	0.389647	0.316489	0.253228	-0.0738352	0.0650481	0.289201					rs11630244; rs17453521; rs4861647; rs59340188; rs62555927; rs722497; rs7334864; rs849116; rs9525230; rs9848175
k__Bacteria.p__Actinobacteria.c__Actinobacteria.o__Bifidobacteriales.f__Bifidobacteriaceae.g__Bifidobacterium.s__Bifidobacterium_bifidum	AMD	Inverse variance weighted	10	0.0462083	0.0943116	0.624167				11.5268	9	0.24132	0.912521	rs11630244; rs17453521; rs4861647; rs59340188; rs62555927; rs722497; rs7334864; rs849116; rs9525230; rs9848175
k__Bacteria.p__Actinobacteria.c__Actinobacteria.o__Bifidobacteriales.f__Bifidobacteriaceae.g__Bifidobacterium.s__Bifidobacterium_bifidum	AMD	Weighted median	10	0.068419	0.108742	0.529226								rs11630244; rs17453521; rs4861647; rs59340188; rs62555927; rs722497; rs7334864; rs849116; rs9525230; rs9848175
k__Bacteria.p__Actinobacteria.c__Actinobacteria.o__Bifidobacteriales.f__Bifidobacteriaceae.g__Bifidobacterium.s__Bifidobacterium_bifidum	AMD	MR-PRESSO	10	0.0462083	0.0943116	0.635888								rs11630244; rs17453521; rs4861647; rs59340188; rs62555927; rs722497; rs7334864; rs849116; rs9525230; rs9848175
k__Bacteria.p__Actinobacteria.c__Actinobacteria.o__Coriobacteriales.f__Coriobacteriaceae.g__Collinsella	AMD	MR Egger	4	6.21042	2.40836	0.123201	-0.664741	0.26417	0.128243					rs11782083; rs550057; rs6099022; rs7831606
k__Bacteria.p__Actinobacteria.c__Actinobacteria.o__Coriobacteriales.f__Coriobacteriaceae.g__Collinsella	AMD	Inverse variance weighted	4	0.176994	0.337917	0.600432				6.68614	3	0.0826038	0.912521	rs11782083; rs550057; rs6099022; rs7831606
k__Bacteria.p__Actinobacteria.c__Actinobacteria.o__Coriobacteriales.f__Coriobacteriaceae.g__Collinsella	AMD	Weighted median	4	-0.0458977	0.332395	0.890176								rs11782083; rs550057; rs6099022; rs7831606
k__Bacteria.p__Actinobacteria.c__Actinobacteria.o__Coriobacteriales.f__Coriobacteriaceae.g__Collinsella	AMD	MR-PRESSO	4	0.176994	0.337917	0.636663								rs11782083; rs550057; rs6099022; rs7831606
k__Bacteria.p__Actinobacteria.c__Actinobacteria.o__Coriobacteriales.f__Coriobacteriaceae.g__Collinsella.s__Collinsella_aerofaciens	AMD	MR Egger	3	0.648491	6.39862	0.935699	-0.0373591	0.700065	0.966059					rs386274; rs550057; rs72845940
k__Bacteria.p__Actinobacteria.c__Actinobacteria.o__Coriobacteriales.f__Coriobacteriaceae.g__Collinsella.s__Collinsella_aerofaciens	AMD	Inverse variance weighted	3	0.308392	0.404596	0.445928				4.79467	2	0.0909599	0.912521	rs386274; rs550057; rs72845940
k__Bacteria.p__Actinobacteria.c__Actinobacteria.o__Coriobacteriales.f__Coriobacteriaceae.g__Collinsella.s__Collinsella_aerofaciens	AMD	Weighted median	3	0.0273034	0.370578	0.941267								rs386274; rs550057; rs72845940
k__Bacteria.p__Actinobacteria.c__Actinobacteria.o__Coriobacteriales.f__Coriobacteriaceae.g__Collinsella.s__Collinsella_aerofaciens	AMD	MR-PRESSO	3											rs386274; rs550057; rs72845940
k__Bacteria.p__Bacteroidetes.c__Bacteroidia.o__Bacteroidales.f__Rikenellaceae.g__Alistipes.s__Alistipes_sp_AP11	AMD	MR Egger	4	-0.0332946	0.868126	0.972891	0.0255646	0.162176	0.889221					rs12022867; rs13333427; rs1553042; rs28450200
k__Bacteria.p__Bacteroidetes.c__Bacteroidia.o__Bacteroidales.f__Rikenellaceae.g__Alistipes.s__Alistipes_sp_AP11	AMD	Inverse variance weighted	4	0.0999592	0.162359	0.538115				3.5153	3	0.318783	0.912521	rs12022867; rs13333427; rs1553042; rs28450200
k__Bacteria.p__Bacteroidetes.c__Bacteroidia.o__Bacteroidales.f__Rikenellaceae.g__Alistipes.s__Alistipes_sp_AP11	AMD	Weighted median	4	0.21648	0.176517	0.220049								rs12022867; rs13333427; rs1553042; rs28450200
k__Bacteria.p__Bacteroidetes.c__Bacteroidia.o__Bacteroidales.f__Rikenellaceae.g__Alistipes.s__Alistipes_sp_AP11	AMD	MR-PRESSO	4	0.0999592	0.162359	0.581672								rs12022867; rs13333427; rs1553042; rs28450200
LACTOSECAT.PWY..lactose.and.galactose.degradation.I	AMD	MR Egger	8	-0.134018	0.569299	0.821721	0.0359749	0.0811041	0.672905					rs118184992; rs17034687; rs191667368; rs4960590; rs507666; rs7147611; rs80205307; rs9982657
LACTOSECAT.PWY..lactose.and.galactose.degradation.I	AMD	Inverse variance weighted	8	0.107881	0.163375	0.509043				5.21384	7	0.633885	0.912521	rs118184992; rs17034687; rs191667368; rs4960590; rs507666; rs7147611; rs80205307; rs9982657
LACTOSECAT.PWY..lactose.and.galactose.degradation.I	AMD	Weighted median	8	0.0673204	0.218309	0.757799								rs118184992; rs17034687; rs191667368; rs4960590; rs507666; rs7147611; rs80205307; rs9982657
LACTOSECAT.PWY..lactose.and.galactose.degradation.I	AMD	MR-PRESSO	8	0.153662	0.135936	0.291058								rs118184992; rs17034687; rs191667368; rs4960590; rs507666; rs7147611; rs80205307; rs9982657
P105.PWY..TCA.cycle.IV..2.oxoglutarate.decarboxylase.	AMD	Inverse variance weighted	2	0.129608	0.215477	0.547512				0.477834	1	0.489405	0.912521	rs36182340; rs72814612
P105.PWY..TCA.cycle.IV..2.oxoglutarate.decarboxylase.	AMD	MR-PRESSO	2											rs36182340; rs72814612
PWY.6151..S.adenosyl.L.methionine.cycle.I	AMD	MR Egger	7	-1.27342	0.668721	0.115231	0.116861	0.0660844	0.137237					rs12530267; rs1751578; rs2235334; rs2827430; rs62314649; rs6879880; rs7513344
PWY.6151..S.adenosyl.L.methionine.cycle.I	AMD	Inverse variance weighted	7	-0.138598	0.188039	0.461081				4.23637	6	0.644723	0.912521	rs12530267; rs1751578; rs2235334; rs2827430; rs62314649; rs6879880; rs7513344
PWY.6151..S.adenosyl.L.methionine.cycle.I	AMD	Weighted median	7	-0.182492	0.249984	0.46538								rs12530267; rs1751578; rs2235334; rs2827430; rs62314649; rs6879880; rs7513344
PWY.6151..S.adenosyl.L.methionine.cycle.I	AMD	MR-PRESSO	7	0.0238345	0.21975	0.916673								rs12530267; rs1751578; rs2235334; rs2827430; rs62314649; rs6879880; rs7513344
PWY.6708..ubiquinol.8.biosynthesis..prokaryotic.	AMD	MR Egger	6	0.0678548	0.430282	0.882335	-0.0283301	0.0731023	0.718094					rs113976504; rs11898768; rs12550124; rs1624064; rs2636908; rs3750879
PWY.6708..ubiquinol.8.biosynthesis..prokaryotic.	AMD	Inverse variance weighted	6	-0.0911626	0.129524	0.48154				0.642612	5	0.985969	0.912521	rs113976504; rs11898768; rs12550124; rs1624064; rs2636908; rs3750879
PWY.6708..ubiquinol.8.biosynthesis..prokaryotic.	AMD	Weighted median	6	-0.130195	0.155143	0.401359								rs113976504; rs11898768; rs12550124; rs1624064; rs2636908; rs3750879
PWY.6708..ubiquinol.8.biosynthesis..prokaryotic.	AMD	MR-PRESSO	6	-0.0911626	0.0464344	0.106842								rs113976504; rs11898768; rs12550124; rs1624064; rs2636908; rs3750879
PWY.7234..inosine.5..phosphate.biosynthesis.III	AMD	MR Egger	6	-0.107306	1.52859	0.947405	0.00110023	0.24117	0.996578					rs112075774; rs117005933; rs1275053; rs35096174; rs79676117; rs928495
PWY.7234..inosine.5..phosphate.biosynthesis.III	AMD	Inverse variance weighted	6	-0.100392	0.198385	0.612826				2.79706	5	0.731239	0.912521	rs112075774; rs117005933; rs1275053; rs35096174; rs79676117; rs928495
PWY.7234..inosine.5..phosphate.biosynthesis.III	AMD	Weighted median	6	-0.142047	0.247404	0.565865								rs112075774; rs117005933; rs1275053; rs35096174; rs79676117; rs928495
PWY.7234..inosine.5..phosphate.biosynthesis.III	AMD	MR-PRESSO	6	-0.100392	0.14838	0.528698								rs112075774; rs117005933; rs1275053; rs35096174; rs79676117; rs928495
PWY.841..superpathway.of.purine.nucleotides.de.novo.biosynthesis.I	AMD	MR Egger	5	-0.0948962	1.08926	0.936066	0.0226155	0.127353	0.870365					rs11588127; rs1584586; rs35698389; rs57187632; rs60748324
PWY.841..superpathway.of.purine.nucleotides.de.novo.biosynthesis.I	AMD	Inverse variance weighted	5	0.0946911	0.216124	0.661289				2.76173	4	0.598457	0.912521	rs11588127; rs1584586; rs35698389; rs57187632; rs60748324
PWY.841..superpathway.of.purine.nucleotides.de.novo.biosynthesis.I	AMD	Weighted median	5	0.170077	0.274345	0.535299								rs11588127; rs1584586; rs35698389; rs57187632; rs60748324
PWY.841..superpathway.of.purine.nucleotides.de.novo.biosynthesis.I	AMD	MR-PRESSO	5	0.0946911	0.179582	0.625886								rs11588127; rs1584586; rs35698389; rs57187632; rs60748324
k__Bacteria.p__Actinobacteria	AMD	MR Egger	7	0.137	0.757232	0.863534	-0.0115389	0.0800883	0.891067					rs182549; rs2197344; rs35344390; rs6044857; rs61939486; rs74452406; rs926010
k__Bacteria.p__Actinobacteria	AMD	Inverse variance weighted	7	0.0307395	0.171626	0.857853				3.91487	6	0.688196	0.933576	rs182549; rs2197344; rs35344390; rs6044857; rs61939486; rs74452406; rs926010
k__Bacteria.p__Actinobacteria	AMD	Weighted median	7	-0.138028	0.213746	0.518435								rs182549; rs2197344; rs35344390; rs6044857; rs61939486; rs74452406; rs926010
k__Bacteria.p__Actinobacteria	AMD	MR-PRESSO	7	0.0307395	0.138633	0.831875								rs182549; rs2197344; rs35344390; rs6044857; rs61939486; rs74452406; rs926010
k__Bacteria.p__Actinobacteria.c__Actinobacteria	AMD	MR Egger	7	0.136873	0.7572	0.863653	-0.0115257	0.0800847	0.891185					rs182549; rs2197344; rs35344390; rs6044857; rs61939486; rs74452406; rs926010
k__Bacteria.p__Actinobacteria.c__Actinobacteria	AMD	Inverse variance weighted	7	0.0307337	0.171626	0.85788				3.91488	6	0.688195	0.933576	rs182549; rs2197344; rs35344390; rs6044857; rs61939486; rs74452406; rs926010
k__Bacteria.p__Actinobacteria.c__Actinobacteria	AMD	Weighted median	7	-0.138068	0.213096	0.517039								rs182549; rs2197344; rs35344390; rs6044857; rs61939486; rs74452406; rs926010
k__Bacteria.p__Actinobacteria.c__Actinobacteria	AMD	MR-PRESSO	7	0.0307337	0.138633	0.831908								rs182549; rs2197344; rs35344390; rs6044857; rs61939486; rs74452406; rs926010
k__Bacteria.p__Actinobacteria.c__Actinobacteria.o__Bifidobacteriales.f__Bifidobacteriaceae.g__Bifidobacterium.s__Bifidobacterium_longum	AMD	MR Egger	6	-0.0585421	0.906161	0.951589	0.0112733	0.106793	0.921011					rs10033190; rs13391731; rs1446585; rs6780177; rs73412051; rs7761703
k__Bacteria.p__Actinobacteria.c__Actinobacteria.o__Bifidobacteriales.f__Bifidobacteriaceae.g__Bifidobacterium.s__Bifidobacterium_longum	AMD	Inverse variance weighted	6	0.0349514	0.179644	0.845738				4.56378	5	0.471395	0.933576	rs10033190; rs13391731; rs1446585; rs6780177; rs73412051; rs7761703
k__Bacteria.p__Actinobacteria.c__Actinobacteria.o__Bifidobacteriales.f__Bifidobacteriaceae.g__Bifidobacterium.s__Bifidobacterium_longum	AMD	Weighted median	6	-0.133038	0.226506	0.556971								rs10033190; rs13391731; rs1446585; rs6780177; rs73412051; rs7761703
k__Bacteria.p__Actinobacteria.c__Actinobacteria.o__Bifidobacteriales.f__Bifidobacteriaceae.g__Bifidobacterium.s__Bifidobacterium_longum	AMD	MR-PRESSO	6	0.0349514	0.171629	0.84666								rs10033190; rs13391731; rs1446585; rs6780177; rs73412051; rs7761703
PWY.5088..L.glutamate.degradation.VIII..to.propanoate.	AMD	MR Egger	4	-0.223531	0.424294	0.65091	0.0652148	0.105387	0.599131					rs11732315; rs12028490; rs2127754; rs9927590
PWY.5088..L.glutamate.degradation.VIII..to.propanoate.	AMD	Inverse variance weighted	4	0.0250535	0.121718	0.836922				3.15775	3	0.367937	0.933576	rs11732315; rs12028490; rs2127754; rs9927590
PWY.5088..L.glutamate.degradation.VIII..to.propanoate.	AMD	Weighted median	4	-0.0513644	0.148502	0.72943								rs11732315; rs12028490; rs2127754; rs9927590
PWY.5088..L.glutamate.degradation.VIII..to.propanoate.	AMD	MR-PRESSO	4	0.0250535	0.121718	0.850098								rs11732315; rs12028490; rs2127754; rs9927590
PWY.6353..purine.nucleotides.degradation.II..aerobic.	AMD	MR Egger	9	-0.0801714	0.759316	0.918875	0.0131725	0.0800329	0.87392					rs10801008; rs12201310; rs12336386; rs132685; rs2137304; rs2895633; rs396769; rs4551833; rs7527876
PWY.6353..purine.nucleotides.degradation.II..aerobic.	AMD	Inverse variance weighted	9	0.0418069	0.165271	0.8003				4.94163	8	0.763797	0.933576	rs10801008; rs12201310; rs12336386; rs132685; rs2137304; rs2895633; rs396769; rs4551833; rs7527876
PWY.6353..purine.nucleotides.degradation.II..aerobic.	AMD	Weighted median	9	0.0745861	0.216958	0.73101								rs10801008; rs12201310; rs12336386; rs132685; rs2137304; rs2895633; rs396769; rs4551833; rs7527876
PWY.6353..purine.nucleotides.degradation.II..aerobic.	AMD	MR-PRESSO	9	0.0418069	0.129893	0.755812								rs10801008; rs12201310; rs12336386; rs132685; rs2137304; rs2895633; rs396769; rs4551833; rs7527876
PYRIDNUCSYN.PWY..NAD.biosynthesis.I..from.aspartate.	AMD	MR Egger	8	1.05427	0.720108	0.193517	-0.133431	0.083703	0.162023					rs1126742; rs12871823; rs143920868; rs148280750; rs169503; rs74459573; rs8045981; rs9811455
PYRIDNUCSYN.PWY..NAD.biosynthesis.I..from.aspartate.	AMD	Inverse variance weighted	8	-0.0578058	0.178543	0.746117				4.58091	7	0.710954	0.933576	rs1126742; rs12871823; rs143920868; rs148280750; rs169503; rs74459573; rs8045981; rs9811455
PYRIDNUCSYN.PWY..NAD.biosynthesis.I..from.aspartate.	AMD	Weighted median	8	-0.123987	0.242682	0.609419								rs1126742; rs12871823; rs143920868; rs148280750; rs169503; rs74459573; rs8045981; rs9811455
PYRIDNUCSYN.PWY..NAD.biosynthesis.I..from.aspartate.	AMD	MR-PRESSO	8	-0.0578058	0.144434	0.700925								rs1126742; rs12871823; rs143920868; rs148280750; rs169503; rs74459573; rs8045981; rs9811455
PWY.7209..superpathway.of.pyrimidine.ribonucleosides.degradation	AMD	MR Egger	9	0.357735	0.546167	0.533397	-0.0433893	0.066238	0.533361					rs10489050; rs11215429; rs11242123; rs1474383; rs261555; rs617079; rs6587723; rs6805759; rs836868
PWY.7209..superpathway.of.pyrimidine.ribonucleosides.degradation	AMD	Inverse variance weighted	9	0.0144334	0.148149	0.922389				9.28132	8	0.319123	0.975097	rs10489050; rs11215429; rs11242123; rs1474383; rs261555; rs617079; rs6587723; rs6805759; rs836868
PWY.7209..superpathway.of.pyrimidine.ribonucleosides.degradation	AMD	Weighted median	9	0.0893929	0.190783	0.639386								rs10489050; rs11215429; rs11242123; rs1474383; rs261555; rs617079; rs6587723; rs6805759; rs836868
PWY.7209..superpathway.of.pyrimidine.ribonucleosides.degradation	AMD	MR-PRESSO	9	0.0144334	0.148149	0.924785								rs10489050; rs11215429; rs11242123; rs1474383; rs261555; rs617079; rs6587723; rs6805759; rs836868
k__Bacteria.p__Proteobacteria.c__Gammaproteobacteria.o__Enterobacteriales.f__Enterobacteriaceae.g__Escherichia.s__Escherichia_unclassified	AMD	MR Egger	5	0.240981	1.20551	0.854342	-0.0319518	0.148862	0.84381					rs10900435; rs115534005; rs12300342; rs12700345; rs2791437
k__Bacteria.p__Proteobacteria.c__Gammaproteobacteria.o__Enterobacteriales.f__Enterobacteriaceae.g__Escherichia.s__Escherichia_unclassified	AMD	Inverse variance weighted	5	-0.00811253	0.284716	0.977269				10.5719	4	0.0318214	0.986266	rs10900435; rs115534005; rs12300342; rs12700345; rs2791437
k__Bacteria.p__Proteobacteria.c__Gammaproteobacteria.o__Enterobacteriales.f__Enterobacteriaceae.g__Escherichia.s__Escherichia_unclassified	AMD	Weighted median	5	-0.243178	0.248206	0.327213								rs10900435; rs115534005; rs12300342; rs12700345; rs2791437
k__Bacteria.p__Proteobacteria.c__Gammaproteobacteria.o__Enterobacteriales.f__Enterobacteriaceae.g__Escherichia.s__Escherichia_unclassified	AMD	MR-PRESSO	5	-0.00811253	0.284716	0.978634								rs10900435; rs115534005; rs12300342; rs12700345; rs2791437
PWY_REDCITCYC..TCA.cycle.VIII..helicobacter.	AMD	MR Egger	7	0.518585	0.645793	0.458418	-0.0817493	0.0989997	0.446541					rs10159356; rs12035973; rs2420153; rs3923652; rs61545203; rs8057488; rs9965721
PWY_REDCITCYC..TCA.cycle.VIII..helicobacter.	AMD	Inverse variance weighted	7	-0.00237438	0.137935	0.986266				3.31992	6	0.767753	0.986266	rs10159356; rs12035973; rs2420153; rs3923652; rs61545203; rs8057488; rs9965721
PWY_REDCITCYC..TCA.cycle.VIII..helicobacter.	AMD	Weighted median	7	0.00994931	0.178108	0.955452								rs10159356; rs12035973; rs2420153; rs3923652; rs61545203; rs8057488; rs9965721
PWY_REDCITCYC..TCA.cycle.VIII..helicobacter.	AMD	MR-PRESSO	7	-0.00237438	0.102604	0.982288								rs10159356; rs12035973; rs2420153; rs3923652; rs61545203; rs8057488; rs9965721

## Sheet: c.ReverseMR_AMD
Legend: This table lists reverse MR results when using AMD as exposure. For taxa and pathways tested, we show the results of IVW, WM, MR-PRESSO tests. MR-Egger was run to derive the intercept for evaluating pleiotropy, but for completeness also the causal estimate is reported. For IVW, the Cochran's Q test results are also shown. The pval_adj column reports the IVW adjusted pvalue after multiple …
exposure	outcome	method	nsnp	beta_c	se	pval	egger_intercept.ple	se.ple	pval.ple	Q.het	Q_df.het	Q_pval.het	pval_adj	IV_list
AMD	k__Bacteria.p__Actinobacteria.c__Actinobacteria.o__Coriobacteriales	MR Egger	4	-0.0249822	0.13545	0.870678	0.00708371	0.0383595	0.87052					rs17180732; rs1913424; rs34840657; rs4403590
AMD	k__Bacteria.p__Actinobacteria.c__Actinobacteria.o__Coriobacteriales	Weighted median	4	-0.00617847	0.04951	0.900688				1.56268	3	0.667881		rs17180732; rs1913424; rs34840657; rs4403590
AMD	k__Bacteria.p__Actinobacteria.c__Actinobacteria.o__Coriobacteriales	Inverse variance weighted	4	-0.00120336	0.0420237	0.977156							0.998026	rs17180732; rs1913424; rs34840657; rs4403590
AMD	k__Bacteria.p__Actinobacteria.c__Actinobacteria.o__Coriobacteriales	MR-PRESSO	4	-0.000520627	0.0237111	0.983534								rs17180732; rs1913424; rs34840657; rs4403590
AMD	k__Bacteria.p__Actinobacteria.c__Actinobacteria.o__Coriobacteriales.f__Coriobacteriaceae	MR Egger	4	-0.0250059	0.135451	0.870557	0.00710038	0.0383595	0.870221					rs17180732; rs1913424; rs34840657; rs4403590
AMD	k__Bacteria.p__Actinobacteria.c__Actinobacteria.o__Coriobacteriales.f__Coriobacteriaceae	Weighted median	4	-0.00615314	0.0508469	0.903681				1.56384	3	0.667616		rs17180732; rs1913424; rs34840657; rs4403590
AMD	k__Bacteria.p__Actinobacteria.c__Actinobacteria.o__Coriobacteriales.f__Coriobacteriaceae	Inverse variance weighted	4	-0.00117107	0.0420238	0.977768							0.998026	rs17180732; rs1913424; rs34840657; rs4403590
AMD	k__Bacteria.p__Actinobacteria.c__Actinobacteria.o__Coriobacteriales.f__Coriobacteriaceae	MR-PRESSO	4	-0.0004827	0.0237201	0.984739								rs17180732; rs1913424; rs34840657; rs4403590

## Sheet: d.AMD_Replications
Legend: This table lists MR results of replications when using AMD as outcome, with three different GWAS of AMD (GCST90086112 - AMD2, GCST010723 - EarlyAMD and AMD from Finngen study r11). For taxa and pathways tested, we show the results of IVW, WM, MR-PRESSO tests. MR-Egger was run to derive the intercept for evaluating pleiotropy, but for completeness also the causal estimate is reported. For …
exposure	outcome	method	nsnp	beta_c	se	pval	egger_intercept.ple	se.ple	pval.ple	Q.het	Q_df.het	Q_pval.het	pval_adj	IV_list
k__Bacteria.p__Actinobacteria.c__Actinobacteria.o__Coriobacteriales.f__Coriobacteriaceae	AMD2	MR Egger	6	0.627389	0.834506	0.493984	-0.047163	0.0814495	0.593602				0.254936	rs11652058; rs28806584; rs2907732; rs4234207; rs550057; rs78362376
k__Bacteria.p__Actinobacteria.c__Actinobacteria.o__Coriobacteriales.f__Coriobacteriaceae	AMD2	Inverse variance weighted	6	0.15025	0.13196	0.254867				2.11204	5	0.833435	0.254936	rs11652058; rs28806584; rs2907732; rs4234207; rs550057; rs78362376
k__Bacteria.p__Actinobacteria.c__Actinobacteria.o__Coriobacteriales.f__Coriobacteriaceae	AMD2	Weighted median	6	0.0699607	0.162356	0.666535							0.254936	rs11652058; rs28806584; rs2907732; rs4234207; rs550057; rs78362376
k__Bacteria.p__Actinobacteria.c__Actinobacteria.o__Coriobacteriales.f__Coriobacteriaceae	AMD2	MR-PRESSO	6	0.15025	0.0857647	0.14018							0.254936	rs11652058; rs28806584; rs2907732; rs4234207; rs550057; rs78362376
k__Bacteria.p__Actinobacteria.c__Actinobacteria.o__Coriobacteriales	AMD2	MR Egger	6	0.627229	0.835023	0.494338	-0.047151	0.0815031	0.593926				0.254936	rs11652058; rs28806584; rs2907732; rs4234207; rs550057; rs78362376
k__Bacteria.p__Actinobacteria.c__Actinobacteria.o__Coriobacteriales	AMD2	Inverse variance weighted	6	0.150223	0.131955	0.254936				2.11242	5	0.833382	0.254936	rs11652058; rs28806584; rs2907732; rs4234207; rs550057; rs78362376
k__Bacteria.p__Actinobacteria.c__Actinobacteria.o__Coriobacteriales	AMD2	Weighted median	6	0.0699589	0.159194	0.66033							0.254936	rs11652058; rs28806584; rs2907732; rs4234207; rs550057; rs78362376
k__Bacteria.p__Actinobacteria.c__Actinobacteria.o__Coriobacteriales	AMD2	MR-PRESSO	6	0.150223	0.085769	0.140254							0.254936	rs11652058; rs28806584; rs2907732; rs4234207; rs550057; rs78362376
k__Bacteria.p__Actinobacteria.c__Actinobacteria.o__Coriobacteriales.f__Coriobacteriaceae	EarlyAMD	MR Egger	6	-0.402524	0.510012	0.474119	0.0479557	0.0510623	0.400822				0.36794	rs11652058; rs28806584; rs2907732; rs4234207; rs550057; rs78362376
k__Bacteria.p__Actinobacteria.c__Actinobacteria.o__Coriobacteriales.f__Coriobacteriaceae	EarlyAMD	Inverse variance weighted	6	0.070741	0.0785716	0.36794				1.57375	5	0.904406	0.36794	rs11652058; rs28806584; rs2907732; rs4234207; rs550057; rs78362376
k__Bacteria.p__Actinobacteria.c__Actinobacteria.o__Coriobacteriales.f__Coriobacteriaceae	EarlyAMD	Weighted median	6	0.115597	0.0931404	0.214565							0.36794	rs11652058; rs28806584; rs2907732; rs4234207; rs550057; rs78362376
k__Bacteria.p__Actinobacteria.c__Actinobacteria.o__Coriobacteriales.f__Coriobacteriaceae	EarlyAMD	MR-PRESSO	6	0.070741	0.0440807	0.169443							0.36794	rs11652058; rs28806584; rs2907732; rs4234207; rs550057; rs78362376
k__Bacteria.p__Actinobacteria.c__Actinobacteria.o__Coriobacteriales	EarlyAMD	MR Egger	6	-0.402967	0.510358	0.473945	0.0480012	0.0510983	0.400717				0.36794	rs11652058; rs28806584; rs2907732; rs4234207; rs550057; rs78362376
k__Bacteria.p__Actinobacteria.c__Actinobacteria.o__Coriobacteriales	EarlyAMD	Inverse variance weighted	6	0.0707432	0.0785695	0.367913				1.57366	5	0.904417	0.36794	rs11652058; rs28806584; rs2907732; rs4234207; rs550057; rs78362376
k__Bacteria.p__Actinobacteria.c__Actinobacteria.o__Coriobacteriales	EarlyAMD	Weighted median	6	0.115624	0.0940141	0.218752							0.36794	rs11652058; rs28806584; rs2907732; rs4234207; rs550057; rs78362376
k__Bacteria.p__Actinobacteria.c__Actinobacteria.o__Coriobacteriales	EarlyAMD	MR-PRESSO	6	0.0707432	0.0440782	0.169412							0.36794	rs11652058; rs28806584; rs2907732; rs4234207; rs550057; rs78362376
k__Bacteria.p__Actinobacteria.c__Actinobacteria.o__Coriobacteriales.f__Coriobacteriaceae	AMD_Finngen	MR Egger	6	0.932815	0.489564	0.12943	-0.0829076	0.0486949	0.163857				0.233654	rs11652058; rs28806584; rs2907732; rs4234207; rs550057; rs78362376
k__Bacteria.p__Actinobacteria.c__Actinobacteria.o__Coriobacteriales.f__Coriobacteriaceae	AMD_Finngen	Inverse variance weighted	6	0.110127	0.0924367	0.233505				7.91742	5	0.160846	0.233654	rs11652058; rs28806584; rs2907732; rs4234207; rs550057; rs78362376
k__Bacteria.p__Actinobacteria.c__Actinobacteria.o__Coriobacteriales.f__Coriobacteriaceae	AMD_Finngen	Weighted median	6	0.0413766	0.104532	0.692233							0.233654	rs11652058; rs28806584; rs2907732; rs4234207; rs550057; rs78362376
k__Bacteria.p__Actinobacteria.c__Actinobacteria.o__Coriobacteriales.f__Coriobacteriaceae	AMD_Finngen	MR-PRESSO	6	0.110127	0.0924367	0.286969							0.233654	rs11652058; rs28806584; rs2907732; rs4234207; rs550057; rs78362376
k__Bacteria.p__Actinobacteria.c__Actinobacteria.o__Coriobacteriales	AMD_Finngen	MR Egger	6	0.932859	0.49011	0.129734	-0.0829158	0.0487506	0.164198				0.233654	rs11652058; rs28806584; rs2907732; rs4234207; rs550057; rs78362376
k__Bacteria.p__Actinobacteria.c__Actinobacteria.o__Coriobacteriales	AMD_Finngen	Inverse variance weighted	6	0.110097	0.0924408	0.233654				7.91853	5	0.160783	0.233654	rs11652058; rs28806584; rs2907732; rs4234207; rs550057; rs78362376
k__Bacteria.p__Actinobacteria.c__Actinobacteria.o__Coriobacteriales	AMD_Finngen	Weighted median	6	0.0413392	0.104354	0.691998							0.233654	rs11652058; rs28806584; rs2907732; rs4234207; rs550057; rs78362376
k__Bacteria.p__Actinobacteria.c__Actinobacteria.o__Coriobacteriales	AMD_Finngen	MR-PRESSO	6	0.110097	0.0924408	0.287105							0.233654	rs11652058; rs28806584; rs2907732; rs4234207; rs550057; rs78362376

## Sheet: e.MR_CAD
Legend: This table lists MR results when using CAD as outcome. For taxa and pathways tested, we show the results of IVW, WM, MR-PRESSO tests. MR-Egger was run to derive the intercept for evaluating pleiotropy, but for completeness also the causal estimate is reported. For IVW, the Cochran's Q test results are also shown. The pval_adj column reports the IVW adjusted pvalue after multiple testing. …
exposure	outcome	method	nsnp	beta_c	se	pval	egger_intercept.ple	se.ple	pval.ple	Q.het	Q_df.het	Q_pval.het	pval_adj	IV_list
ASPASN.PWY..superpathway.of.L.aspartate.and.L.asparagine.biosynthesis	CAD	MR Egger	5	-0.261802	0.749682	0.75	0.0269168	0.0693639	0.723875				0.796157	rs113902391; rs12490065; rs2846765; rs820496; rs9545502
ASPASN.PWY..superpathway.of.L.aspartate.and.L.asparagine.biosynthesis	CAD	Inverse variance weighted	5	0.0281471	0.0542009	0.603544				11.6805	4	0.0198919	0.796157	rs113902391; rs12490065; rs2846765; rs820496; rs9545502
ASPASN.PWY..superpathway.of.L.aspartate.and.L.asparagine.biosynthesis	CAD	Weighted median	5	0.0787198	0.0454404	0.0832072							0.796157	rs113902391; rs12490065; rs2846765; rs820496; rs9545502
ASPASN.PWY..superpathway.of.L.aspartate.and.L.asparagine.biosynthesis	CAD	MR-PRESSO	4	0.0281471	0.0542009	0.630955							0.796157	rs113902391; rs2846765; rs820496; rs9545502
ENTBACSYN.PWY..enterobactin.biosynthesis	CAD	Wald ratio	1	0.0293652	0.032388	0.364583							0.735306	rs706111
ENTBACSYN.PWY..enterobactin.biosynthesis	CAD	MR-PRESSO	1										0.735306	rs706111
GLYCOCAT.PWY..glycogen.degradation.I..bacterial.	CAD	MR Egger	5	-0.143768	0.135239	0.365739	0.0120339	0.0152724	0.488249				0.735306	rs115001375; rs2056101; rs35296932; rs41474647; rs59657730
GLYCOCAT.PWY..glycogen.degradation.I..bacterial.	CAD	Inverse variance weighted	5	-0.0393257	0.0268369	0.142823				2.2692	4	0.686381	0.735306	rs115001375; rs2056101; rs35296932; rs41474647; rs59657730
GLYCOCAT.PWY..glycogen.degradation.I..bacterial.	CAD	Weighted median	5	-0.0449331	0.0327744	0.170381							0.735306	rs115001375; rs2056101; rs35296932; rs41474647; rs59657730
GLYCOCAT.PWY..glycogen.degradation.I..bacterial.	CAD	MR-PRESSO	5	-0.0393257	0.0202134	0.12359							0.735306	rs115001375; rs2056101; rs35296932; rs41474647; rs59657730
HISDEG.PWY..L.histidine.degradation.I	CAD	MR Egger	7	0.108658	0.208202	0.624036	-0.00992319	0.0208314	0.653908				0.833198	rs11948304; rs12137024; rs1501270; rs2175835; rs3095927; rs6783574; rs9275187
HISDEG.PWY..L.histidine.degradation.I	CAD	Inverse variance weighted	7	0.0122579	0.0456789	0.78843				17.2839	6	0.00829458	0.833198	rs11948304; rs12137024; rs1501270; rs2175835; rs3095927; rs6783574; rs9275187
HISDEG.PWY..L.histidine.degradation.I	CAD	Weighted median	7	0.011788	0.0391944	0.763599							0.833198	rs11948304; rs12137024; rs1501270; rs2175835; rs3095927; rs6783574; rs9275187
HISDEG.PWY..L.histidine.degradation.I	CAD	MR-PRESSO	6	-0.00393143	0.0424648	0.92883							0.833198	rs11948304; rs12137024; rs2175835; rs3095927; rs6783574; rs9275187
HISTSYN.PWY..L.histidine.biosynthesis	CAD	MR Egger	5	0.217256	0.134701	0.205169	-0.0254463	0.016556	0.221893				0.796157	rs10005886; rs10772275; rs12098656; rs7145596; rs78778914
HISTSYN.PWY..L.histidine.biosynthesis	CAD	Inverse variance weighted	5	0.0240009	0.055943	0.667906				12.0395	4	0.01706	0.796157	rs10005886; rs10772275; rs12098656; rs7145596; rs78778914
HISTSYN.PWY..L.histidine.biosynthesis	CAD	Weighted median	5	-0.0026838	0.050655	0.957746							0.796157	rs10005886; rs10772275; rs12098656; rs7145596; rs78778914
HISTSYN.PWY..L.histidine.biosynthesis	CAD	MR-PRESSO	4	0.0240009	0.055943	0.690002							0.796157	rs10005886; rs10772275; rs12098656; rs7145596
LACTOSECAT.PWY..lactose.and.galactose.degradation.I	CAD	MR Egger	6	0.458355	0.214056	0.0989453	-0.0472724	0.0292932	0.181876				0.725907	rs17034687; rs4960590; rs507666; rs7147611; rs80205307; rs9982657
LACTOSECAT.PWY..lactose.and.galactose.degradation.I	CAD	Inverse variance weighted	6	0.128485	0.0730195	0.0784764				39.2396	5	2.1252e-07	0.725907	rs17034687; rs4960590; rs507666; rs7147611; rs80205307; rs9982657
LACTOSECAT.PWY..lactose.and.galactose.degradation.I	CAD	Weighted median	6	0.0711364	0.0477454	0.136248							0.725907	rs17034687; rs4960590; rs507666; rs7147611; rs80205307; rs9982657
LACTOSECAT.PWY..lactose.and.galactose.degradation.I	CAD	MR-PRESSO	4	0.102387	0.0697992	0.192776							0.725907	rs17034687; rs507666; rs80205307; rs9982657
P105.PWY..TCA.cycle.IV..2.oxoglutarate.decarboxylase.	CAD	Inverse variance weighted	2	0.0712711	0.032094	0.0263714				0.130248	1	0.718175	0.487794	rs36182340; rs72814612
P105.PWY..TCA.cycle.IV..2.oxoglutarate.decarboxylase.	CAD	MR-PRESSO	2										0.487794	rs36182340; rs72814612
PWY.5088..L.glutamate.degradation.VIII..to.propanoate.	CAD	MR Egger	4	-0.0378165	0.0613958	0.60069	0.00702638	0.0154968	0.694698				0.796157	rs11732315; rs12028490; rs2127754; rs9927590
PWY.5088..L.glutamate.degradation.VIII..to.propanoate.	CAD	Inverse variance weighted	4	-0.0114415	0.0168386	0.496832				3.24953	3	0.35473	0.796157	rs11732315; rs12028490; rs2127754; rs9927590
PWY.5088..L.glutamate.degradation.VIII..to.propanoate.	CAD	Weighted median	4	-0.0161467	0.0200637	0.420952							0.796157	rs11732315; rs12028490; rs2127754; rs9927590
PWY.5088..L.glutamate.degradation.VIII..to.propanoate.	CAD	MR-PRESSO	4	-0.0114415	0.0168386	0.545563							0.796157	rs11732315; rs12028490; rs2127754; rs9927590
PWY.6147..6.hydroxymethyl.dihydropterin.diphosphate.biosynthesis.I	CAD	MR Egger	7	0.180833	0.244527	0.492827	-0.0176502	0.0218555	0.456015				0.796157	rs10792007; rs11732083; rs1366290; rs1940600; rs2548882; rs2714053; rs73401412
PWY.6147..6.hydroxymethyl.dihydropterin.diphosphate.biosynthesis.I	CAD	Inverse variance weighted	7	-0.0147402	0.0328681	0.653818				9.02699	6	0.172066	0.796157	rs10792007; rs11732083; rs1366290; rs1940600; rs2548882; rs2714053; rs73401412
PWY.6147..6.hydroxymethyl.dihydropterin.diphosphate.biosynthesis.I	CAD	Weighted median	7	0.0243699	0.0373395	0.513978							0.796157	rs10792007; rs11732083; rs1366290; rs1940600; rs2548882; rs2714053; rs73401412
PWY.6147..6.hydroxymethyl.dihydropterin.diphosphate.biosynthesis.I	CAD	MR-PRESSO	7	-0.0285071	0.0314609	0.394994							0.796157	rs10792007; rs11732083; rs1366290; rs1940600; rs2548882; rs2714053; rs73401412
PWY.6151..S.adenosyl.L.methionine.cycle.I	CAD	MR Egger	8	0.0670063	0.169035	0.705521	-0.00498087	0.0170042	0.77945				0.796157	rs116996492; rs12530267; rs1751578; rs2235334; rs2827430; rs62314649; rs6879880; rs7513344
PWY.6151..S.adenosyl.L.methionine.cycle.I	CAD	Inverse variance weighted	8	0.0194251	0.0436047	0.655972				20.4847	7	0.00461256	0.796157	rs116996492; rs12530267; rs1751578; rs2235334; rs2827430; rs62314649; rs6879880; rs7513344
PWY.6151..S.adenosyl.L.methionine.cycle.I	CAD	Weighted median	8	0.0479155	0.0366133	0.190639							0.796157	rs116996492; rs12530267; rs1751578; rs2235334; rs2827430; rs62314649; rs6879880; rs7513344
PWY.6151..S.adenosyl.L.methionine.cycle.I	CAD	MR-PRESSO	7	0.0215679	0.0387326	0.592867							0.796157	rs12530267; rs1751578; rs2235334; rs2827430; rs62314649; rs6879880; rs7513344
PWY.6353..purine.nucleotides.degradation.II..aerobic.	CAD	MR Egger	9	-0.121718	0.1595	0.470323	0.0103155	0.0168858	0.56057				0.787812	rs10801008; rs12201310; rs12336386; rs132685; rs2137304; rs2895633; rs396769; rs4551833; rs7527876
PWY.6353..purine.nucleotides.degradation.II..aerobic.	CAD	Inverse variance weighted	9	-0.0266312	0.0334428	0.425844				16.6315	8	0.034183	0.787812	rs10801008; rs12201310; rs12336386; rs132685; rs2137304; rs2895633; rs396769; rs4551833; rs7527876
PWY.6353..purine.nucleotides.degradation.II..aerobic.	CAD	Weighted median	9	-0.0343921	0.0362659	0.342961							0.787812	rs10801008; rs12201310; rs12336386; rs132685; rs2137304; rs2895633; rs396769; rs4551833; rs7527876
PWY.6353..purine.nucleotides.degradation.II..aerobic.	CAD	MR-PRESSO	8	-0.0266312	0.0334428	0.448828							0.787812	rs10801008; rs12201310; rs12336386; rs132685; rs2137304; rs2895633; rs396769; rs4551833; rs7527876
PWY.6612..superpathway.of.tetrahydrofolate.biosynthesis	CAD	MR Egger	9	-0.0100226	0.157032	0.950894	-0.00282318	0.0189035	0.885491				0.735306	rs1027949; rs10815601; rs1573442; rs17155574; rs17824268; rs2214921; rs35989200; rs4833077; rs6673038
PWY.6612..superpathway.of.tetrahydrofolate.biosynthesis	CAD	Inverse variance weighted	9	-0.0330025	0.0293836	0.26137				18.9938	8	0.0148931	0.735306	rs1027949; rs10815601; rs1573442; rs17155574; rs17824268; rs2214921; rs35989200; rs4833077; rs6673038
PWY.6612..superpathway.of.tetrahydrofolate.biosynthesis	CAD	Weighted median	9	0.00762296	0.0282633	0.787382							0.735306	rs1027949; rs10815601; rs1573442; rs17155574; rs17824268; rs2214921; rs35989200; rs4833077; rs6673038
PWY.6612..superpathway.of.tetrahydrofolate.biosynthesis	CAD	MR-PRESSO	8	-0.0330025	0.0293836	0.293942							0.735306	rs1027949; rs10815601; rs1573442; rs17155574; rs17824268; rs2214921; rs35989200; rs6673038
PWY.6708..ubiquinol.8.biosynthesis..prokaryotic.	CAD	MR Egger	6	0.0522124	0.116859	0.678144	-0.00066383	0.0196399	0.974656				0.735306	rs113976504; rs11898768; rs12550124; rs1624064; rs2636908; rs3750879
PWY.6708..ubiquinol.8.biosynthesis..prokaryotic.	CAD	Inverse variance weighted	6	0.0484418	0.0311331	0.119718				14.082	5	0.0150969	0.735306	rs113976504; rs11898768; rs12550124; rs1624064; rs2636908; rs3750879
PWY.6708..ubiquinol.8.biosynthesis..prokaryotic.	CAD	Weighted median	6	0.0228296	0.0289849	0.430908							0.735306	rs113976504; rs11898768; rs12550124; rs1624064; rs2636908; rs3750879
PWY.6708..ubiquinol.8.biosynthesis..prokaryotic.	CAD	MR-PRESSO	5	0.0484418	0.0311331	0.180443							0.735306	rs113976504; rs12550124; rs1624064; rs2636908; rs3750879
PWY.7209..superpathway.of.pyrimidine.ribonucleosides.degradation	CAD	MR Egger	10	0.0785002	0.082686	0.370223	-0.0153799	0.0103138	0.174249				0.735306	rs10489050; rs11215429; rs11242123; rs1474383; rs261555; rs4783336; rs617079; rs6587723; rs6805759; rs836868
PWY.7209..superpathway.of.pyrimidine.ribonucleosides.degradation	CAD	Inverse variance weighted	10	-0.0392198	0.0262136	0.134612				17.2288	9	0.0452512	0.735306	rs10489050; rs11215429; rs11242123; rs1474383; rs261555; rs4783336; rs617079; rs6587723; rs6805759; rs836868
PWY.7209..superpathway.of.pyrimidine.ribonucleosides.degradation	CAD	Weighted median	10	-0.0240389	0.0285205	0.399305							0.735306	rs10489050; rs11215429; rs11242123; rs1474383; rs261555; rs4783336; rs617079; rs6587723; rs6805759; rs836868
PWY.7209..superpathway.of.pyrimidine.ribonucleosides.degradation	CAD	MR-PRESSO	10	-0.0392198	0.0262136	0.168829							0.735306	rs10489050; rs11215429; rs11242123; rs1474383; rs261555; rs4783336; rs617079; rs6587723; rs6805759; rs836868
PWY.7234..inosine.5..phosphate.biosynthesis.III	CAD	MR Egger	6	-0.270819	0.201978	0.251053	0.0415241	0.0321977	0.266684				0.796157	rs112075774; rs117005933; rs1275053; rs35096174; rs79676117; rs928495
PWY.7234..inosine.5..phosphate.biosynthesis.III	CAD	Inverse variance weighted	6	-0.0128682	0.0298417	0.666311				5.64338	5	0.34248	0.796157	rs112075774; rs117005933; rs1275053; rs35096174; rs79676117; rs928495
PWY.7234..inosine.5..phosphate.biosynthesis.III	CAD	Weighted median	6	-0.00714005	0.0378083	0.850211							0.796157	rs112075774; rs117005933; rs1275053; rs35096174; rs79676117; rs928495
PWY.7234..inosine.5..phosphate.biosynthesis.III	CAD	MR-PRESSO	6	-0.0128682	0.0298417	0.684269							0.796157	rs112075774; rs117005933; rs1275053; rs35096174; rs79676117; rs928495
PWY.841..superpathway.of.purine.nucleotides.de.novo.biosynthesis.I	CAD	MR Egger	5	-0.0261024	0.221953	0.913814	0.00722147	0.0259564	0.79892				0.735306	rs11588127; rs1584586; rs35698389; rs57187632; rs60748324
PWY.841..superpathway.of.purine.nucleotides.de.novo.biosynthesis.I	CAD	Inverse variance weighted	5	0.0343977	0.0389844	0.377589				6.23745	4	0.182103	0.735306	rs11588127; rs1584586; rs35698389; rs57187632; rs60748324
PWY.841..superpathway.of.purine.nucleotides.de.novo.biosynthesis.I	CAD	Weighted median	5	0.0289982	0.0437222	0.507178							0.735306	rs11588127; rs1584586; rs35698389; rs57187632; rs60748324
PWY.841..superpathway.of.purine.nucleotides.de.novo.biosynthesis.I	CAD	MR-PRESSO	5	0.0343977	0.0389844	0.427424							0.735306	rs11588127; rs1584586; rs35698389; rs57187632; rs60748324
PWY_REDCITCYC..TCA.cycle.VIII..helicobacter.	CAD	MR Egger	7	0.111942	0.104909	0.334743	-0.0163708	0.0162231	0.359236				0.796157	rs10159356; rs12035973; rs2420153; rs3923652; rs61545203; rs8057488; rs9965721
PWY_REDCITCYC..TCA.cycle.VIII..helicobacter.	CAD	Inverse variance weighted	7	0.00879915	0.0236701	0.710086				8.62252	6	0.195947	0.796157	rs10159356; rs12035973; rs2420153; rs3923652; rs61545203; rs8057488; rs9965721
PWY_REDCITCYC..TCA.cycle.VIII..helicobacter.	CAD	Weighted median	7	0.00341182	0.026437	0.897314							0.796157	rs10159356; rs12035973; rs2420153; rs3923652; rs61545203; rs8057488; rs9965721
PWY_REDCITCYC..TCA.cycle.VIII..helicobacter.	CAD	MR-PRESSO	7	0.00879915	0.0236701	0.72286							0.796157	rs10159356; rs12035973; rs2420153; rs3923652; rs61545203; rs8057488; rs9965721
PYRIDNUCSYN.PWY..NAD.biosynthesis.I..from.aspartate.	CAD	MR Egger	8	-0.190939	0.10905	0.130522	0.0207963	0.0125421	0.148368				0.796157	rs1126742; rs12871823; rs143920868; rs148280750; rs169503; rs74459573; rs8045981; rs9811455
PYRIDNUCSYN.PWY..NAD.biosynthesis.I..from.aspartate.	CAD	Inverse variance weighted	8	-0.0154128	0.0287368	0.59172				8.4301	7	0.296199	0.796157	rs1126742; rs12871823; rs143920868; rs148280750; rs169503; rs74459573; rs8045981; rs9811455
PYRIDNUCSYN.PWY..NAD.biosynthesis.I..from.aspartate.	CAD	Weighted median	8	-0.00324805	0.0342679	0.924486							0.796157	rs1126742; rs12871823; rs143920868; rs148280750; rs169503; rs74459573; rs8045981; rs9811455
PYRIDNUCSYN.PWY..NAD.biosynthesis.I..from.aspartate.	CAD	MR-PRESSO	8	-0.0154128	0.0287368	0.608335							0.796157	rs1126742; rs12871823; rs143920868; rs148280750; rs169503; rs74459573; rs8045981; rs9811455
TRPSYN.PWY..L.tryptophan.biosynthesis	CAD	MR Egger	5	-0.0878802	0.170674	0.642158	0.00740057	0.0178456	0.706232				0.796157	rs17399145; rs1990421; rs2935713; rs55893824; rs62241211
TRPSYN.PWY..L.tryptophan.biosynthesis	CAD	Inverse variance weighted	5	-0.0200509	0.043417	0.644209				6.38676	4	0.172067	0.796157	rs17399145; rs1990421; rs2935713; rs55893824; rs62241211
TRPSYN.PWY..L.tryptophan.biosynthesis	CAD	Weighted median	5	-0.0154542	0.0501686	0.758048							0.796157	rs17399145; rs1990421; rs2935713; rs55893824; rs62241211
TRPSYN.PWY..L.tryptophan.biosynthesis	CAD	MR-PRESSO	5	-0.0200509	0.043417	0.668209							0.796157	rs17399145; rs1990421; rs2935713; rs55893824; rs62241211
k__Bacteria.p__Actinobacteria.c__Actinobacteria	CAD	MR Egger	8	0.0117691	0.109754	0.918101	0.00398591	0.0112811	0.735927				0.487794	rs12955365; rs182549; rs2197344; rs35344390; rs6044857; rs61939486; rs74452406; rs926010
k__Bacteria.p__Actinobacteria.c__Actinobacteria	CAD	Inverse variance weighted	8	0.0496017	0.0240963	0.0395445				3.388	7	0.846942	0.487794	rs12955365; rs182549; rs2197344; rs35344390; rs6044857; rs61939486; rs74452406; rs926010
k__Bacteria.p__Actinobacteria.c__Actinobacteria	CAD	Weighted median	8	0.0555211	0.0295854	0.0605679							0.487794	rs12955365; rs182549; rs2197344; rs35344390; rs6044857; rs61939486; rs74452406; rs926010
k__Bacteria.p__Actinobacteria.c__Actinobacteria	CAD	MR-PRESSO	8	0.0496017	0.0167639	0.0211396							0.487794	rs12955365; rs182549; rs2197344; rs35344390; rs6044857; rs61939486; rs74452406; rs926010
k__Bacteria.p__Firmicutes.c__Negativicutes	CAD	MR Egger	5	0.0896289	0.195139	0.677251	-0.00976734	0.0232077	0.702183				0.833198	rs12472147; rs12979658; rs2282037; rs77764206; rs78791321
k__Bacteria.p__Firmicutes.c__Negativicutes	CAD	Inverse variance weighted	5	0.00980982	0.040946	0.810656				7.24502	4	0.123493	0.833198	rs12472147; rs12979658; rs2282037; rs77764206; rs78791321
k__Bacteria.p__Firmicutes.c__Negativicutes	CAD	Weighted median	5	-0.00990233	0.0440922	0.822304							0.833198	rs12472147; rs12979658; rs2282037; rs77764206; rs78791321
k__Bacteria.p__Firmicutes.c__Negativicutes	CAD	MR-PRESSO	5	0.00980982	0.040946	0.822432							0.833198	rs12472147; rs12979658; rs2282037; rs77764206; rs78791321
k__Bacteria.p__Actinobacteria.c__Actinobacteria.o__Bifidobacteriales.f__Bifidobacteriaceae	CAD	MR Egger	6	0.0286064	0.0846341	0.752357	-0.0014049	0.00908503	0.884595				0.796157	rs10455532; rs12657170; rs182549; rs4851317; rs4859454; rs74452406
k__Bacteria.p__Actinobacteria.c__Actinobacteria.o__Bifidobacteriales.f__Bifidobacteriaceae	CAD	Inverse variance weighted	6	0.0161573	0.026113	0.536085				2.88683	5	0.717428	0.796157	rs10455532; rs12657170; rs182549; rs4851317; rs4859454; rs74452406
k__Bacteria.p__Actinobacteria.c__Actinobacteria.o__Bifidobacteriales.f__Bifidobacteriaceae	CAD	Weighted median	6	0.0297402	0.0311915	0.340351							0.796157	rs10455532; rs12657170; rs182549; rs4851317; rs4859454; rs74452406
k__Bacteria.p__Actinobacteria.c__Actinobacteria.o__Bifidobacteriales.f__Bifidobacteriaceae	CAD	MR-PRESSO	6	0.0161573	0.0198419	0.452495							0.796157	rs10455532; rs12657170; rs182549; rs4851317; rs4859454; rs74452406
k__Bacteria.p__Actinobacteria.c__Actinobacteria.o__Coriobacteriales.f__Coriobacteriaceae	CAD	MR Egger	5	0.389014	0.674123	0.60435	-0.0288031	0.0687535	0.703452				0.735306	rs11652058; rs28806584; rs4234207; rs550057; rs78362376
k__Bacteria.p__Actinobacteria.c__Actinobacteria.o__Coriobacteriales.f__Coriobacteriaceae	CAD	Inverse variance weighted	5	0.10978	0.0898528	0.221791				31.7494	4	2.15249e-06	0.735306	rs11652058; rs28806584; rs4234207; rs550057; rs78362376
k__Bacteria.p__Actinobacteria.c__Actinobacteria.o__Coriobacteriales.f__Coriobacteriaceae	CAD	Weighted median	5	0.0182637	0.0473019	0.699415							0.735306	rs11652058; rs28806584; rs4234207; rs550057; rs78362376
k__Bacteria.p__Actinobacteria.c__Actinobacteria.o__Coriobacteriales.f__Coriobacteriaceae	CAD	MR-PRESSO	4	0.10978	0.0898528	0.288869							0.735306	rs11652058; rs28806584; rs4234207; rs78362376
k__Bacteria.p__Bacteroidetes.c__Bacteroidia.o__Bacteroidales.f__Rikenellaceae	CAD	MR Egger	3	0.0239412	0.150887	0.899823	0.00283378	0.0188098	0.904806				0.735306	rs11211406; rs2465506; rs73344869
k__Bacteria.p__Bacteroidetes.c__Bacteroidia.o__Bacteroidales.f__Rikenellaceae	CAD	Inverse variance weighted	3	0.0458339	0.0406154	0.259115				0.448851	2	0.798975	0.735306	rs11211406; rs2465506; rs73344869
k__Bacteria.p__Bacteroidetes.c__Bacteroidia.o__Bacteroidales.f__Rikenellaceae	CAD	Weighted median	3	0.0445183	0.0495946	0.369376							0.735306	rs11211406; rs2465506; rs73344869
k__Bacteria.p__Bacteroidetes.c__Bacteroidia.o__Bacteroidales.f__Rikenellaceae	CAD	MR-PRESSO	3										0.735306	rs11211406; rs2465506; rs73344869
k__Bacteria.p__Actinobacteria.c__Actinobacteria.o__Bifidobacteriales.f__Bifidobacteriaceae.g__Bifidobacterium	CAD	MR Egger	6	0.00649831	0.0871352	0.944132	0.00250903	0.00972523	0.809143				0.735306	rs10455532; rs12657170; rs182549; rs4472164; rs4859454; rs74452406
k__Bacteria.p__Actinobacteria.c__Actinobacteria.o__Bifidobacteriales.f__Bifidobacteriaceae.g__Bifidobacterium	CAD	Inverse variance weighted	6	0.0279176	0.0264524	0.291247				1.45693	5	0.917985	0.735306	rs10455532; rs12657170; rs182549; rs4472164; rs4859454; rs74452406
k__Bacteria.p__Actinobacteria.c__Actinobacteria.o__Bifidobacteriales.f__Bifidobacteriaceae.g__Bifidobacterium	CAD	Weighted median	6	0.0307839	0.0323452	0.341234							0.735306	rs10455532; rs12657170; rs182549; rs4472164; rs4859454; rs74452406
k__Bacteria.p__Actinobacteria.c__Actinobacteria.o__Bifidobacteriales.f__Bifidobacteriaceae.g__Bifidobacterium	CAD	MR-PRESSO	6	0.0279176	0.0142791	0.107958							0.735306	rs10455532; rs12657170; rs182549; rs4472164; rs4859454; rs74452406
k__Bacteria.p__Actinobacteria.c__Actinobacteria.o__Coriobacteriales.f__Coriobacteriaceae.g__Collinsella	CAD	MR Egger	4	1.77419	0.851428	0.172564	-0.183569	0.0933649	0.188189				0.735306	rs11782083; rs550057; rs6099022; rs7831606
k__Bacteria.p__Actinobacteria.c__Actinobacteria.o__Coriobacteriales.f__Coriobacteriaceae.g__Collinsella	CAD	Inverse variance weighted	4	0.10746	0.111066	0.33328				35.2159	3	1.09678e-07	0.735306	rs11782083; rs550057; rs6099022; rs7831606
k__Bacteria.p__Actinobacteria.c__Actinobacteria.o__Coriobacteriales.f__Coriobacteriaceae.g__Collinsella	CAD	Weighted median	4	-0.00167974	0.0514484	0.973955							0.735306	rs11782083; rs550057; rs6099022; rs7831606
k__Bacteria.p__Actinobacteria.c__Actinobacteria.o__Coriobacteriales.f__Coriobacteriaceae.g__Collinsella	CAD	MR-PRESSO	1	0.10746	0.111066	0.404648							0.735306	rs11782083
k__Bacteria.p__Bacteroidetes.c__Bacteroidia.o__Bacteroidales.f__Rikenellaceae.g__Alistipes	CAD	MR Egger	3	0.0248217	0.151001	0.89628	0.00271882	0.0188772	0.908936				0.735306	rs11211406; rs2465506; rs73344869
k__Bacteria.p__Bacteroidetes.c__Bacteroidia.o__Bacteroidales.f__Rikenellaceae.g__Alistipes	CAD	Inverse variance weighted	3	0.0457729	0.040501	0.258406				0.445053	2	0.800494	0.735306	rs11211406; rs2465506; rs73344869
k__Bacteria.p__Bacteroidetes.c__Bacteroidia.o__Bacteroidales.f__Rikenellaceae.g__Alistipes	CAD	Weighted median	3	0.0445674	0.0499837	0.372587							0.735306	rs11211406; rs2465506; rs73344869
k__Bacteria.p__Bacteroidetes.c__Bacteroidia.o__Bacteroidales.f__Rikenellaceae.g__Alistipes	CAD	MR-PRESSO	3										0.735306	rs11211406; rs2465506; rs73344869
k__Bacteria.p__Actinobacteria.c__Actinobacteria.o__Bifidobacteriales	CAD	MR Egger	6	0.0286405	0.0846791	0.752201	-0.00140837	0.00908938	0.884368				0.796157	rs10455532; rs12657170; rs182549; rs4851317; rs4859454; rs74452406
k__Bacteria.p__Actinobacteria.c__Actinobacteria.o__Bifidobacteriales	CAD	Inverse variance weighted	6	0.0161593	0.0261144	0.536056				2.88678	5	0.717436	0.796157	rs10455532; rs12657170; rs182549; rs4851317; rs4859454; rs74452406
k__Bacteria.p__Actinobacteria.c__Actinobacteria.o__Bifidobacteriales	CAD	Weighted median	6	0.0297371	0.0318026	0.349761							0.796157	rs10455532; rs12657170; rs182549; rs4851317; rs4859454; rs74452406
k__Bacteria.p__Actinobacteria.c__Actinobacteria.o__Bifidobacteriales	CAD	MR-PRESSO	6	0.0161593	0.0198427	0.45246							0.796157	rs10455532; rs12657170; rs182549; rs4851317; rs4859454; rs74452406
k__Bacteria.p__Actinobacteria.c__Actinobacteria.o__Coriobacteriales	CAD	MR Egger	5	0.388622	0.674755	0.605018	-0.0287653	0.0688199	0.704078				0.735306	rs11652058; rs28806584; rs4234207; rs550057; rs78362376
k__Bacteria.p__Actinobacteria.c__Actinobacteria.o__Coriobacteriales	CAD	Inverse variance weighted	5	0.109757	0.0898566	0.221908				31.7537	4	2.14809e-06	0.735306	rs11652058; rs28806584; rs4234207; rs550057; rs78362376
k__Bacteria.p__Actinobacteria.c__Actinobacteria.o__Coriobacteriales	CAD	Weighted median	5	0.0182443	0.046908	0.697322							0.735306	rs11652058; rs28806584; rs4234207; rs550057; rs78362376
k__Bacteria.p__Actinobacteria.c__Actinobacteria.o__Coriobacteriales	CAD	MR-PRESSO	4	0.109757	0.0898566	0.288974							0.735306	rs11652058; rs28806584; rs4234207; rs78362376
k__Bacteria.p__Firmicutes.c__Negativicutes.o__Selenomonadales	CAD	MR Egger	5	0.0896125	0.19515	0.677321	-0.00976519	0.0232083	0.702252				0.833198	rs12472147; rs12979658; rs2282037; rs77764206; rs78791321
k__Bacteria.p__Firmicutes.c__Negativicutes.o__Selenomonadales	CAD	Inverse variance weighted	5	0.0098089	0.0409471	0.810679				7.24504	4	0.123492	0.833198	rs12472147; rs12979658; rs2282037; rs77764206; rs78791321
k__Bacteria.p__Firmicutes.c__Negativicutes.o__Selenomonadales	CAD	Weighted median	5	-0.0099101	0.0444024	0.823389							0.833198	rs12472147; rs12979658; rs2282037; rs77764206; rs78791321
k__Bacteria.p__Firmicutes.c__Negativicutes.o__Selenomonadales	CAD	MR-PRESSO	5	0.0098089	0.0409471	0.822453							0.833198	rs12472147; rs12979658; rs2282037; rs77764206; rs78791321
k__Bacteria.p__Actinobacteria	CAD	MR Egger	8	0.0117341	0.109761	0.918349	0.0039894	0.0112819	0.735725				0.487794	rs12955365; rs182549; rs2197344; rs35344390; rs6044857; rs61939486; rs74452406; rs926010
k__Bacteria.p__Actinobacteria	CAD	Inverse variance weighted	8	0.0495997	0.0240961	0.0395508				3.38827	7	0.846914	0.487794	rs12955365; rs182549; rs2197344; rs35344390; rs6044857; rs61939486; rs74452406; rs926010
k__Bacteria.p__Actinobacteria	CAD	Weighted median	8	0.0555209	0.0308141	0.0715769							0.487794	rs12955365; rs182549; rs2197344; rs35344390; rs6044857; rs61939486; rs74452406; rs926010
k__Bacteria.p__Actinobacteria	CAD	MR-PRESSO	8	0.0495997	0.0167644	0.0211459							0.487794	rs12955365; rs182549; rs2197344; rs35344390; rs6044857; rs61939486; rs74452406; rs926010
k__Bacteria.p__Actinobacteria.c__Actinobacteria.o__Bifidobacteriales.f__Bifidobacteriaceae.g__Bifidobacterium.s__Bifidobacterium_adolescentis	CAD	MR Egger	8	-0.00785762	0.0841131	0.928613	0.00439827	0.00930204	0.653045				0.735306	rs11986537; rs4110696; rs4256405; rs4351047; rs4646215; rs6754311; rs74394156; rs8045380
k__Bacteria.p__Actinobacteria.c__Actinobacteria.o__Bifidobacteriales.f__Bifidobacteriaceae.g__Bifidobacterium.s__Bifidobacterium_adolescentis	CAD	Inverse variance weighted	8	0.030557	0.0217803	0.160626				2.60112	7	0.919292	0.735306	rs11986537; rs4110696; rs4256405; rs4351047; rs4646215; rs6754311; rs74394156; rs8045380
k__Bacteria.p__Actinobacteria.c__Actinobacteria.o__Bifidobacteriales.f__Bifidobacteriaceae.g__Bifidobacterium.s__Bifidobacterium_adolescentis	CAD	Weighted median	8	0.0344598	0.0277391	0.214132							0.735306	rs11986537; rs4110696; rs4256405; rs4351047; rs4646215; rs6754311; rs74394156; rs8045380
k__Bacteria.p__Actinobacteria.c__Actinobacteria.o__Bifidobacteriales.f__Bifidobacteriaceae.g__Bifidobacterium.s__Bifidobacterium_adolescentis	CAD	MR-PRESSO	8	0.030557	0.0132768	0.0548673							0.735306	rs11986537; rs4110696; rs4256405; rs4351047; rs4646215; rs6754311; rs74394156; rs8045380
k__Bacteria.p__Actinobacteria.c__Actinobacteria.o__Bifidobacteriales.f__Bifidobacteriaceae.g__Bifidobacterium.s__Bifidobacterium_bifidum	CAD	MR Egger	11	-0.0206551	0.0829803	0.809014	9.35651e-06	0.0174794	0.999585				0.735306	rs11630244; rs17453521; rs4861647; rs59340188; rs62555927; rs722497; rs7334864; rs8176645; rs849116; rs9525230; rs9848175
k__Bacteria.p__Actinobacteria.c__Actinobacteria.o__Bifidobacteriales.f__Bifidobacteriaceae.g__Bifidobacterium.s__Bifidobacterium_bifidum	CAD	Inverse variance weighted	11	-0.0206124	0.0217517	0.343322				39.397	10	2.16293e-05	0.735306	rs11630244; rs17453521; rs4861647; rs59340188; rs62555927; rs722497; rs7334864; rs8176645; rs849116; rs9525230; rs9848175
k__Bacteria.p__Actinobacteria.c__Actinobacteria.o__Bifidobacteriales.f__Bifidobacteriaceae.g__Bifidobacterium.s__Bifidobacterium_bifidum	CAD	Weighted median	11	-0.00504856	0.0179353	0.778337							0.735306	rs11630244; rs17453521; rs4861647; rs59340188; rs62555927; rs722497; rs7334864; rs8176645; rs849116; rs9525230; rs9848175
k__Bacteria.p__Actinobacteria.c__Actinobacteria.o__Bifidobacteriales.f__Bifidobacteriaceae.g__Bifidobacterium.s__Bifidobacterium_bifidum	CAD	MR-PRESSO	9	-0.0206124	0.0217517	0.365659							0.735306	rs17453521; rs4861647; rs59340188; rs62555927; rs722497; rs7334864; rs849116; rs9525230; rs9848175
k__Bacteria.p__Actinobacteria.c__Actinobacteria.o__Bifidobacteriales.f__Bifidobacteriaceae.g__Bifidobacterium.s__Bifidobacterium_longum	CAD	MR Egger	6	-0.0132928	0.138598	0.928206	0.00151419	0.0162455	0.930221				0.979744	rs10033190; rs13391731; rs1446585; rs6780177; rs73412051; rs7761703
k__Bacteria.p__Actinobacteria.c__Actinobacteria.o__Bifidobacteriales.f__Bifidobacteriaceae.g__Bifidobacterium.s__Bifidobacterium_longum	CAD	Inverse variance weighted	6	-0.000669313	0.0263609	0.979744				5.40928	5	0.367996	0.979744	rs10033190; rs13391731; rs1446585; rs6780177; rs73412051; rs7761703
k__Bacteria.p__Actinobacteria.c__Actinobacteria.o__Bifidobacteriales.f__Bifidobacteriaceae.g__Bifidobacterium.s__Bifidobacterium_longum	CAD	Weighted median	6	0.0360233	0.0330458	0.275668							0.979744	rs10033190; rs13391731; rs1446585; rs6780177; rs73412051; rs7761703
k__Bacteria.p__Actinobacteria.c__Actinobacteria.o__Bifidobacteriales.f__Bifidobacteriaceae.g__Bifidobacterium.s__Bifidobacterium_longum	CAD	MR-PRESSO	6	-0.000669313	0.0263609	0.980726							0.979744	rs10033190; rs13391731; rs1446585; rs6780177; rs73412051; rs7761703
k__Bacteria.p__Actinobacteria.c__Actinobacteria.o__Coriobacteriales.f__Coriobacteriaceae.g__Collinsella.s__Collinsella_aerofaciens	CAD	MR Egger	3	-0.491896	2.133	0.85571	0.0696592	0.233251	0.815245				0.735306	rs386274; rs550057; rs72845940
k__Bacteria.p__Actinobacteria.c__Actinobacteria.o__Coriobacteriales.f__Coriobacteriaceae.g__Collinsella.s__Collinsella_aerofaciens	CAD	Inverse variance weighted	3	0.142542	0.141325	0.313162				28.7166	2	5.81118e-07	0.735306	rs386274; rs550057; rs72845940
k__Bacteria.p__Actinobacteria.c__Actinobacteria.o__Coriobacteriales.f__Coriobacteriaceae.g__Collinsella.s__Collinsella_aerofaciens	CAD	Weighted median	3	0.0146126	0.0586643	0.803293							0.735306	rs386274; rs550057; rs72845940
k__Bacteria.p__Actinobacteria.c__Actinobacteria.o__Coriobacteriales.f__Coriobacteriaceae.g__Collinsella.s__Collinsella_aerofaciens	CAD	MR-PRESSO	3										0.735306	rs386274; rs550057; rs72845940
k__Bacteria.p__Bacteroidetes.c__Bacteroidia.o__Bacteroidales.f__Rikenellaceae.g__Alistipes.s__Alistipes_sp_AP11	CAD	MR Egger	4	-0.113671	0.0935609	0.348357	0.0246374	0.0173538	0.291524				0.796157	rs12022867; rs13333427; rs1553042; rs28450200
k__Bacteria.p__Bacteroidetes.c__Bacteroidia.o__Bacteroidales.f__Rikenellaceae.g__Alistipes.s__Alistipes_sp_AP11	CAD	Inverse variance weighted	4	0.0156404	0.02139	0.464656				2.20444	3	0.531074	0.796157	rs12022867; rs13333427; rs1553042; rs28450200
k__Bacteria.p__Bacteroidetes.c__Bacteroidia.o__Bacteroidales.f__Rikenellaceae.g__Alistipes.s__Alistipes_sp_AP11	CAD	Weighted median	4	0.0217466	0.0266643	0.414747							0.796157	rs12022867; rs13333427; rs1553042; rs28450200
k__Bacteria.p__Bacteroidetes.c__Bacteroidia.o__Bacteroidales.f__Rikenellaceae.g__Alistipes.s__Alistipes_sp_AP11	CAD	MR-PRESSO	4	0.0156404	0.0183358	0.456351							0.796157	rs12022867; rs13333427; rs1553042; rs28450200
k__Bacteria.p__Proteobacteria.c__Gammaproteobacteria.o__Enterobacteriales.f__Enterobacteriaceae.g__Escherichia.s__Escherichia_unclassified	CAD	MR Egger	5	0.0261772	0.169172	0.886853	-0.0052641	0.0206277	0.815068				0.796157	rs10900435; rs115534005; rs12300342; rs12700345; rs2791437
k__Bacteria.p__Proteobacteria.c__Gammaproteobacteria.o__Enterobacteriales.f__Enterobacteriaceae.g__Escherichia.s__Escherichia_unclassified	CAD	Inverse variance weighted	5	-0.0154771	0.0389188	0.690869				9.13908	4	0.0577156	0.796157	rs10900435; rs115534005; rs12300342; rs12700345; rs2791437
k__Bacteria.p__Proteobacteria.c__Gammaproteobacteria.o__Enterobacteriales.f__Enterobacteriaceae.g__Escherichia.s__Escherichia_unclassified	CAD	Weighted median	5	0.022811	0.034316	0.506221							0.796157	rs10900435; rs115534005; rs12300342; rs12700345; rs2791437
k__Bacteria.p__Proteobacteria.c__Gammaproteobacteria.o__Enterobacteriales.f__Enterobacteriaceae.g__Escherichia.s__Escherichia_unclassified	CAD	MR-PRESSO	5	-0.0154771	0.0389188	0.711178							0.796157	rs10900435; rs115534005; rs12300342; rs12700345; rs2791437

## Sheet: f.MR_Cardio
Legend: This table lists MR results when using Cardiovascular aging as outcome. For taxa and pathways tested, we show the results of IVW, WM, MR-PRESSO tests. MR-Egger was run to derive the intercept for evaluating pleiotropy, but for completeness also the causal estimate is reported. For IVW, the Cochran's Q test results are also shown. The pval_adj column reports the IVW adjusted pvalue after m…
exposure	outcome	method	nsnp	beta_c	se	pval	egger_intercept.ple	se.ple	pval.ple	Q.het	Q_df.het	Q_pval.het	pval_adj	IV_list
ASPASN.PWY..superpathway.of.L.aspartate.and.L.asparagine.biosynthesis	Cardiovascular aging	Inverse variance weighted	2	0.904106	0.550755	0.100678				0.0145084	1	0.904126	0.793657	rs113902391; rs9545502
ASPASN.PWY..superpathway.of.L.aspartate.and.L.asparagine.biosynthesis	Cardiovascular aging	MR-PRESSO	2											rs113902391; rs9545502
GLYCOCAT.PWY..glycogen.degradation.I..bacterial.	Cardiovascular aging	MR Egger	5	2.60381	1.4515	0.170723	-0.274694	0.165151	0.194841					rs115001375; rs2056101; rs35296932; rs41474647; rs59657730
GLYCOCAT.PWY..glycogen.degradation.I..bacterial.	Cardiovascular aging	Inverse variance weighted	5	0.241376	0.299137	0.419721				3.32434	4	0.505086	0.8981	rs115001375; rs2056101; rs35296932; rs41474647; rs59657730
GLYCOCAT.PWY..glycogen.degradation.I..bacterial.	Cardiovascular aging	MR-PRESSO	5	0.241376	0.272705	0.426095								rs115001375; rs2056101; rs35296932; rs41474647; rs59657730
GLYCOCAT.PWY..glycogen.degradation.I..bacterial.	Cardiovascular aging	Weighted median	5	-0.0544283	0.396903	0.890926								rs115001375; rs2056101; rs35296932; rs41474647; rs59657730
HISDEG.PWY..L.histidine.degradation.I	Cardiovascular aging	MR Egger	5	-2.00566	1.68815	0.320288	0.206681	0.164615	0.298173					rs11948304; rs12137024; rs1501270; rs2175835; rs6783574
HISDEG.PWY..L.histidine.degradation.I	Cardiovascular aging	Inverse variance weighted	5	0.0675159	0.351182	0.847544				2.56557	4	0.632934	0.967082	rs11948304; rs12137024; rs1501270; rs2175835; rs6783574
HISDEG.PWY..L.histidine.degradation.I	Cardiovascular aging	MR-PRESSO	5	0.42793	0.427863	0.363149								rs11948304; rs12137024; rs1501270; rs2175835; rs6783574
HISDEG.PWY..L.histidine.degradation.I	Cardiovascular aging	Weighted median	5	0.369705	0.452029	0.413426								rs11948304; rs12137024; rs1501270; rs2175835; rs6783574
HISTSYN.PWY..L.histidine.biosynthesis	Cardiovascular aging	MR Egger	5	-0.438318	0.980855	0.685258	0.0222314	0.122665	0.867735					rs10005886; rs10772275; rs12098656; rs7145596; rs78778914
HISTSYN.PWY..L.histidine.biosynthesis	Cardiovascular aging	Inverse variance weighted	5	-0.273209	0.363496	0.452283				0.553161	4	0.968124	0.904566	rs10005886; rs10772275; rs12098656; rs7145596; rs78778914
HISTSYN.PWY..L.histidine.biosynthesis	Cardiovascular aging	MR-PRESSO	5	-0.273209	0.135175	0.113349								rs10005886; rs10772275; rs12098656; rs7145596; rs78778914
HISTSYN.PWY..L.histidine.biosynthesis	Cardiovascular aging	Weighted median	5	-0.292627	0.438055	0.504125								rs10005886; rs10772275; rs12098656; rs7145596; rs78778914
LACTOSECAT.PWY..lactose.and.galactose.degradation.I	Cardiovascular aging	MR Egger	5	-0.535398	1.59871	0.759755	0.0381941	0.223617	0.87525					rs118184992; rs4960590; rs507666; rs7147611; rs9982657
LACTOSECAT.PWY..lactose.and.galactose.degradation.I	Cardiovascular aging	Inverse variance weighted	5	-0.27707	0.450841	0.538844				8.47676	4	0.0755949	0.956349	rs118184992; rs4960590; rs507666; rs7147611; rs9982657
LACTOSECAT.PWY..lactose.and.galactose.degradation.I	Cardiovascular aging	MR-PRESSO	5	-0.232878	0.379865	0.56665								rs118184992; rs4960590; rs507666; rs7147611; rs9982657
LACTOSECAT.PWY..lactose.and.galactose.degradation.I	Cardiovascular aging	Weighted median	5	-0.190777	0.464769	0.681456								rs118184992; rs4960590; rs507666; rs7147611; rs9982657
P105.PWY..TCA.cycle.IV..2.oxoglutarate.decarboxylase.	Cardiovascular aging	Inverse variance weighted	2	0.444409	0.343586	0.195858							0.793657	rs36182340; rs72814612
P105.PWY..TCA.cycle.IV..2.oxoglutarate.decarboxylase.	Cardiovascular aging	MR-PRESSO	2							0.672351	1	0.412233		rs36182340; rs72814612
PWY.5088..L.glutamate.degradation.VIII..to.propanoate.	Cardiovascular aging	MR Egger	4	0.788241	0.629774	0.337251	-0.15045	0.156598	0.43806					rs11732315; rs12028490; rs2127754; rs9927590
PWY.5088..L.glutamate.degradation.VIII..to.propanoate.	Cardiovascular aging	Inverse variance weighted	4	0.215272	0.199733	0.281124				3.36844	3	0.338229	0.809301	rs11732315; rs12028490; rs2127754; rs9927590
PWY.5088..L.glutamate.degradation.VIII..to.propanoate.	Cardiovascular aging	MR-PRESSO	4	0.215272	0.199733	0.360067								rs11732315; rs12028490; rs2127754; rs9927590
PWY.5088..L.glutamate.degradation.VIII..to.propanoate.	Cardiovascular aging	Weighted median	4	0.181947	0.221058	0.410467								rs11732315; rs12028490; rs2127754; rs9927590
PWY.6147..6.hydroxymethyl.dihydropterin.diphosphate.biosynthesis.I	Cardiovascular aging	MR Egger	5	-6.4116	2.83745	0.108963	0.553654	0.269281	0.131996					rs10792007; rs11732083; rs2548882; rs2714053; rs73401412
PWY.6147..6.hydroxymethyl.dihydropterin.diphosphate.biosynthesis.I	Cardiovascular aging	Inverse variance weighted	5	-0.620326	0.390589	0.112245				5.20291	4	0.267104	0.793657	rs10792007; rs11732083; rs2548882; rs2714053; rs73401412
PWY.6147..6.hydroxymethyl.dihydropterin.diphosphate.biosynthesis.I	Cardiovascular aging	MR-PRESSO	5	-0.620326	0.390589	0.187441								rs10792007; rs11732083; rs2548882; rs2714053; rs73401412
PWY.6147..6.hydroxymethyl.dihydropterin.diphosphate.biosynthesis.I	Cardiovascular aging	Weighted median	5	-0.565747	0.480718	0.239244								rs10792007; rs11732083; rs2548882; rs2714053; rs73401412
PWY.6151..S.adenosyl.L.methionine.cycle.I	Cardiovascular aging	MR Egger	4	-1.38972	2.00838	0.560501	0.100447	0.186658	0.64436					rs2235334; rs2827430; rs62314649; rs6879880
PWY.6151..S.adenosyl.L.methionine.cycle.I	Cardiovascular aging	Inverse variance weighted	4	-0.332356	0.415797	0.424103				1.71336	3	0.633967	0.8981	rs2235334; rs2827430; rs62314649; rs6879880
PWY.6151..S.adenosyl.L.methionine.cycle.I	Cardiovascular aging	MR-PRESSO	4	-0.0653116	0.362351	0.865724								rs2235334; rs2827430; rs62314649; rs6879880
PWY.6151..S.adenosyl.L.methionine.cycle.I	Cardiovascular aging	Weighted median	4	-0.295804	0.485476	0.542321								rs2235334; rs2827430; rs62314649; rs6879880
PWY.6353..purine.nucleotides.degradation.II..aerobic.	Cardiovascular aging	MR Egger	8	2.84237	1.25975	0.0648765	-0.282274	0.136875	0.084789					rs10801008; rs12201310; rs12336386; rs2137304; rs2895633; rs396769; rs4551833; rs7527876
PWY.6353..purine.nucleotides.degradation.II..aerobic.	Cardiovascular aging	Inverse variance weighted	8	0.308596	0.3265	0.344575				9.63788	7	0.21004	0.88605	rs10801008; rs12201310; rs12336386; rs2137304; rs2895633; rs396769; rs4551833; rs7527876
PWY.6353..purine.nucleotides.degradation.II..aerobic.	Cardiovascular aging	MR-PRESSO	8	0.380771	0.297564	0.236537								rs10801008; rs12201310; rs12336386; rs2137304; rs2895633; rs396769; rs4551833; rs7527876
PWY.6353..purine.nucleotides.degradation.II..aerobic.	Cardiovascular aging	Weighted median	8	0.336112	0.369394	0.362875								rs10801008; rs12201310; rs12336386; rs2137304; rs2895633; rs396769; rs4551833; rs7527876
PWY.6612..superpathway.of.tetrahydrofolate.biosynthesis	Cardiovascular aging	MR Egger	4	0.13555	1.24236	0.923078	-0.0151033	0.172582	0.938236					rs1027949; rs1573442; rs17155574; rs17824268
PWY.6612..superpathway.of.tetrahydrofolate.biosynthesis	Cardiovascular aging	Inverse variance weighted	4	0.0302485	0.309243	0.922079				0.721027	3	0.868247	0.971164	rs1027949; rs1573442; rs17155574; rs17824268
PWY.6612..superpathway.of.tetrahydrofolate.biosynthesis	Cardiovascular aging	MR-PRESSO	4	0.0687747	0.125255	0.612163								rs1027949; rs1573442; rs17155574; rs17824268
PWY.6612..superpathway.of.tetrahydrofolate.biosynthesis	Cardiovascular aging	Weighted median	4	0.108796	0.364782	0.765513								rs1027949; rs1573442; rs17155574; rs17824268
PWY.6708..ubiquinol.8.biosynthesis..prokaryotic.	Cardiovascular aging	MR Egger	3	-0.198945	0.85249	0.854045	0.0153841	0.152257	0.935893					rs113976504; rs11898768; rs1624064
PWY.6708..ubiquinol.8.biosynthesis..prokaryotic.	Cardiovascular aging	Inverse variance weighted	3	-0.117586	0.279956	0.674473				0.527976	2	0.767983	0.956349	rs113976504; rs11898768; rs1624064
PWY.6708..ubiquinol.8.biosynthesis..prokaryotic.	Cardiovascular aging	MR-PRESSO	3	0.0340068	0.18535	0.866126								rs113976504; rs11898768; rs1624064
PWY.6708..ubiquinol.8.biosynthesis..prokaryotic.	Cardiovascular aging	Weighted median	3	-0.0549459	0.332228	0.86864								rs113976504; rs11898768; rs1624064
PWY.7209..superpathway.of.pyrimidine.ribonucleosides.degradation	Cardiovascular aging	MR Egger	3	0.425349	1.32821	0.802697	-0.0641437	0.198403	0.800933					rs10489050; rs11215429; rs261555
PWY.7209..superpathway.of.pyrimidine.ribonucleosides.degradation	Cardiovascular aging	Inverse variance weighted	3	0.0136447	0.377469	0.971164				0.104751	2	0.948972	0.971164	rs10489050; rs11215429; rs261555
PWY.7209..superpathway.of.pyrimidine.ribonucleosides.degradation	Cardiovascular aging	MR-PRESSO	3	-0.0583328	0.161925	0.73688								rs10489050; rs11215429; rs261555
PWY.7209..superpathway.of.pyrimidine.ribonucleosides.degradation	Cardiovascular aging	Weighted median	3	0.0336129	0.464561	0.94232								rs10489050; rs11215429; rs261555
PWY.7234..inosine.5..phosphate.biosynthesis.III	Cardiovascular aging	MR Egger	6	-4.85564	2.43432	0.116827	0.699751	0.383535	0.142136					rs112075774; rs117005933; rs1275053; rs35096174; rs79676117; rs928495
PWY.7234..inosine.5..phosphate.biosynthesis.III	Cardiovascular aging	Inverse variance weighted	6	-0.45172	0.354275	0.202289				6.30836	5	0.27736	0.793657	rs112075774; rs117005933; rs1275053; rs35096174; rs79676117; rs928495
PWY.7234..inosine.5..phosphate.biosynthesis.III	Cardiovascular aging	MR-PRESSO	6	-0.45172	0.354275	0.258322								rs112075774; rs117005933; rs1275053; rs35096174; rs79676117; rs928495
PWY.7234..inosine.5..phosphate.biosynthesis.III	Cardiovascular aging	Weighted median	6	-0.59444	0.419642	0.156617								rs112075774; rs117005933; rs1275053; rs35096174; rs79676117; rs928495
PWY.841..superpathway.of.purine.nucleotides.de.novo.biosynthesis.I	Cardiovascular aging	MR Egger	5	-0.458217	1.7353	0.808837	-0.0128298	0.202751	0.953525					rs11588127; rs1584586; rs35698389; rs57187632; rs60748324
PWY.841..superpathway.of.purine.nucleotides.de.novo.biosynthesis.I	Cardiovascular aging	Inverse variance weighted	5	-0.565835	0.34485	0.100836				1.13602	4	0.888516	0.793657	rs11588127; rs1584586; rs35698389; rs57187632; rs60748324
PWY.841..superpathway.of.purine.nucleotides.de.novo.biosynthesis.I	Cardiovascular aging	MR-PRESSO	5	-0.565835	0.183778	0.0369708								rs11588127; rs1584586; rs35698389; rs57187632; rs60748324
PWY.841..superpathway.of.purine.nucleotides.de.novo.biosynthesis.I	Cardiovascular aging	Weighted median	5	-0.585456	0.435938	0.179279								rs11588127; rs1584586; rs35698389; rs57187632; rs60748324
PWY_REDCITCYC..TCA.cycle.VIII..helicobacter.	Cardiovascular aging	MR Egger	5	-0.81883	2.23517	0.738423	0.0744496	0.357488	0.848365					rs10159356; rs12035973; rs3923652; rs61545203; rs8057488
PWY_REDCITCYC..TCA.cycle.VIII..helicobacter.	Cardiovascular aging	Inverse variance weighted	5	-0.360573	0.342358	0.292247				6.91594	4	0.140398	0.809301	rs10159356; rs12035973; rs3923652; rs61545203; rs8057488
PWY_REDCITCYC..TCA.cycle.VIII..helicobacter.	Cardiovascular aging	MR-PRESSO	5	-0.307792	0.285565	0.330338								rs10159356; rs12035973; rs3923652; rs61545203; rs8057488
PWY_REDCITCYC..TCA.cycle.VIII..helicobacter.	Cardiovascular aging	Weighted median	5	-0.666415	0.347038	0.0548207								rs10159356; rs12035973; rs3923652; rs61545203; rs8057488
PYRIDNUCSYN.PWY..NAD.biosynthesis.I..from.aspartate.	Cardiovascular aging	MR Egger	4	0.27065	1.5089	0.874175	-0.0110354	0.188306	0.958596					rs1126742; rs148280750; rs169503; rs74459573
PYRIDNUCSYN.PWY..NAD.biosynthesis.I..from.aspartate.	Cardiovascular aging	Inverse variance weighted	4	0.185177	0.386754	0.632082				1.21706	3	0.748916	0.956349	rs1126742; rs148280750; rs169503; rs74459573
PYRIDNUCSYN.PWY..NAD.biosynthesis.I..from.aspartate.	Cardiovascular aging	MR-PRESSO	4	0.073328	0.225494	0.761336								rs1126742; rs148280750; rs169503; rs74459573
PYRIDNUCSYN.PWY..NAD.biosynthesis.I..from.aspartate.	Cardiovascular aging	Weighted median	4	0.0721537	0.470619	0.878149								rs1126742; rs148280750; rs169503; rs74459573
TRPSYN.PWY..L.tryptophan.biosynthesis	Cardiovascular aging	MR Egger	4	-0.133769	1.31767	0.928399	-0.00897243	0.14468	0.956191					rs17399145; rs1990421; rs2935713; rs62241211
TRPSYN.PWY..L.tryptophan.biosynthesis	Cardiovascular aging	Inverse variance weighted	4	-0.211491	0.406867	0.6032				0.767323	3	0.857266	0.956349	rs17399145; rs1990421; rs2935713; rs62241211
TRPSYN.PWY..L.tryptophan.biosynthesis	Cardiovascular aging	MR-PRESSO	4	-0.211491	0.20577	0.379663								rs17399145; rs1990421; rs2935713; rs62241211
TRPSYN.PWY..L.tryptophan.biosynthesis	Cardiovascular aging	Weighted median	4	-0.264156	0.444199	0.552057								rs17399145; rs1990421; rs2935713; rs62241211
k__Bacteria.p__Actinobacteria.c__Actinobacteria	Cardiovascular aging	MR Egger	3	-1.26507	2.38344	0.689353	0.149855	0.253853	0.660508					rs35344390; rs74452406; rs926010
k__Bacteria.p__Actinobacteria.c__Actinobacteria	Cardiovascular aging	Inverse variance weighted	3	0.116371	0.452212	0.796919				0.778869	2	0.67744	0.956349	rs35344390; rs74452406; rs926010
k__Bacteria.p__Actinobacteria.c__Actinobacteria	Cardiovascular aging	MR-PRESSO	3	-0.142269	0.321227	0.687833								rs35344390; rs74452406; rs926010
k__Bacteria.p__Actinobacteria.c__Actinobacteria	Cardiovascular aging	Weighted median	3	0.168237	0.548766	0.759168								rs35344390; rs74452406; rs926010
k__Bacteria.p__Firmicutes.c__Negativicutes	Cardiovascular aging	MR Egger	3	-0.466566	1.50996	0.809215	0.0280186	0.190674	0.907117					rs12979658; rs77764206; rs78791321
k__Bacteria.p__Firmicutes.c__Negativicutes	Cardiovascular aging	Inverse variance weighted	3	-0.25432	0.440146	0.563394				0.097886	2	0.952235	0.956349	rs12979658; rs77764206; rs78791321
k__Bacteria.p__Firmicutes.c__Negativicutes	Cardiovascular aging	MR-PRESSO	3											rs12979658; rs77764206; rs78791321
k__Bacteria.p__Firmicutes.c__Negativicutes	Cardiovascular aging	Weighted median	3	-0.196104	0.506018	0.698353								rs12979658; rs77764206; rs78791321
k__Bacteria.p__Actinobacteria.c__Actinobacteria.o__Bifidobacteriales.f__Bifidobacteriaceae	Cardiovascular aging	MR Egger	4	-0.925216	1.24419	0.534593	0.0488921	0.123407	0.730239					rs10455532; rs12657170; rs4859454; rs74452406
k__Bacteria.p__Actinobacteria.c__Actinobacteria.o__Bifidobacteriales.f__Bifidobacteriaceae	Cardiovascular aging	Inverse variance weighted	4	-0.457293	0.391269	0.242506				1.0791	3	0.782122	0.793657	rs10455532; rs12657170; rs4859454; rs74452406
k__Bacteria.p__Actinobacteria.c__Actinobacteria.o__Bifidobacteriales.f__Bifidobacteriaceae	Cardiovascular aging	MR-PRESSO	4	-0.457293	0.234663	0.146457								rs10455532; rs12657170; rs4859454; rs74452406
k__Bacteria.p__Actinobacteria.c__Actinobacteria.o__Bifidobacteriales.f__Bifidobacteriaceae	Cardiovascular aging	Weighted median	4	-0.4246	0.468506	0.364785								rs10455532; rs12657170; rs4859454; rs74452406
k__Bacteria.p__Actinobacteria.c__Actinobacteria.o__Coriobacteriales.f__Coriobacteriaceae	Cardiovascular aging	MR Egger	3	-3.66893	9.71091	0.77003	0.363428	1.02235	0.782561					rs11652058; rs4234207; rs550057
k__Bacteria.p__Actinobacteria.c__Actinobacteria.o__Coriobacteriales.f__Coriobacteriaceae	Cardiovascular aging	Inverse variance weighted	3	-0.235592	0.758404	0.756073				5.93794	2	0.0513562	0.956349	rs11652058; rs4234207; rs550057
k__Bacteria.p__Actinobacteria.c__Actinobacteria.o__Coriobacteriales.f__Coriobacteriaceae	Cardiovascular aging	MR-PRESSO	3	0.0554713	0.506503	0.918066								rs11652058; rs4234207; rs550057
k__Bacteria.p__Actinobacteria.c__Actinobacteria.o__Coriobacteriales.f__Coriobacteriaceae	Cardiovascular aging	Weighted median	3	0.339214	0.564842	0.548141								rs11652058; rs4234207; rs550057
k__Bacteria.p__Bacteroidetes.c__Bacteroidia.o__Bacteroidales.f__Rikenellaceae	Cardiovascular aging	MR Egger	3	-0.670667	2.01854	0.795786	0.000492501	0.253179	0.998762					rs11211406; rs2465506; rs73344869
k__Bacteria.p__Bacteroidetes.c__Bacteroidia.o__Bacteroidales.f__Rikenellaceae	Cardiovascular aging	Inverse variance weighted	3	-0.666884	0.466291	0.152663				1.34337	2	0.510846	0.793657	rs11211406; rs2465506; rs73344869
k__Bacteria.p__Bacteroidetes.c__Bacteroidia.o__Bacteroidales.f__Rikenellaceae	Cardiovascular aging	MR-PRESSO	3											rs11211406; rs2465506; rs73344869
k__Bacteria.p__Bacteroidetes.c__Bacteroidia.o__Bacteroidales.f__Rikenellaceae	Cardiovascular aging	Weighted median	3	-0.820797	0.570965	0.150558								rs11211406; rs2465506; rs73344869
k__Bacteria.p__Actinobacteria.c__Actinobacteria.o__Bifidobacteriales.f__Bifidobacteriaceae.g__Bifidobacterium	Cardiovascular aging	MR Egger	5	-0.971647	1.20781	0.479971	0.0521874	0.122544	0.698911					rs10455532; rs12657170; rs4472164; rs4859454; rs74452406
k__Bacteria.p__Actinobacteria.c__Actinobacteria.o__Bifidobacteriales.f__Bifidobacteriaceae.g__Bifidobacterium	Cardiovascular aging	Inverse variance weighted	5	-0.480399	0.358039	0.179676				1.08445	4	0.896732	0.793657	rs10455532; rs12657170; rs4472164; rs4859454; rs74452406
k__Bacteria.p__Actinobacteria.c__Actinobacteria.o__Bifidobacteriales.f__Bifidobacteriaceae.g__Bifidobacterium	Cardiovascular aging	MR-PRESSO	5	-0.480399	0.186425	0.0615284								rs10455532; rs12657170; rs4472164; rs4859454; rs74452406
k__Bacteria.p__Actinobacteria.c__Actinobacteria.o__Bifidobacteriales.f__Bifidobacteriaceae.g__Bifidobacterium	Cardiovascular aging	Weighted median	5	-0.483077	0.445529	0.278241								rs10455532; rs12657170; rs4472164; rs4859454; rs74452406
k__Bacteria.p__Actinobacteria.c__Actinobacteria.o__Coriobacteriales.f__Coriobacteriaceae.g__Collinsella	Cardiovascular aging	MR-PRESSO	1											rs550057
k__Bacteria.p__Actinobacteria.c__Actinobacteria.o__Coriobacteriales.f__Coriobacteriaceae.g__Collinsella	Cardiovascular aging	Wald ratio	1	-1.27721	0.587253	0.0296382							0.793657	rs550057
k__Bacteria.p__Bacteroidetes.c__Bacteroidia.o__Bacteroidales.f__Rikenellaceae.g__Alistipes	Cardiovascular aging	MR Egger	3	-0.653146	2.02583	0.801447	-0.00137825	0.254817	0.996557					rs11211406; rs2465506; rs73344869
k__Bacteria.p__Bacteroidetes.c__Bacteroidia.o__Bacteroidales.f__Rikenellaceae.g__Alistipes	Cardiovascular aging	Inverse variance weighted	3	-0.663706	0.464966	0.153456				1.35125	2	0.508838	0.793657	rs11211406; rs2465506; rs73344869
k__Bacteria.p__Bacteroidetes.c__Bacteroidia.o__Bacteroidales.f__Rikenellaceae.g__Alistipes	Cardiovascular aging	MR-PRESSO	3											rs11211406; rs2465506; rs73344869
k__Bacteria.p__Bacteroidetes.c__Bacteroidia.o__Bacteroidales.f__Rikenellaceae.g__Alistipes	Cardiovascular aging	Weighted median	3	-0.8122	0.603194	0.178142								rs11211406; rs2465506; rs73344869
k__Bacteria.p__Actinobacteria.c__Actinobacteria.o__Bifidobacteriales	Cardiovascular aging	MR Egger	4	-0.926185	1.24502	0.534456	0.0489893	0.123489	0.729909					rs10455532; rs12657170; rs4859454; rs74452406
k__Bacteria.p__Actinobacteria.c__Actinobacteria.o__Bifidobacteriales	Cardiovascular aging	Inverse variance weighted	4	-0.457296	0.391271	0.242506				1.0791	3	0.782122	0.793657	rs10455532; rs12657170; rs4859454; rs74452406
k__Bacteria.p__Actinobacteria.c__Actinobacteria.o__Bifidobacteriales	Cardiovascular aging	MR-PRESSO	4	-0.457296	0.234664	0.146457								rs10455532; rs12657170; rs4859454; rs74452406
k__Bacteria.p__Actinobacteria.c__Actinobacteria.o__Bifidobacteriales	Cardiovascular aging	Weighted median	4	-0.424654	0.442821	0.337571								rs10455532; rs12657170; rs4859454; rs74452406
k__Bacteria.p__Actinobacteria.c__Actinobacteria.o__Coriobacteriales	Cardiovascular aging	MR Egger	3	-3.66266	9.72399	0.770672	0.362772	1.02371	0.783192					rs11652058; rs4234207; rs550057
k__Bacteria.p__Actinobacteria.c__Actinobacteria.o__Coriobacteriales	Cardiovascular aging	Inverse variance weighted	3	-0.235453	0.758433	0.756222				5.93828	2	0.0513473	0.956349	rs11652058; rs4234207; rs550057
k__Bacteria.p__Actinobacteria.c__Actinobacteria.o__Coriobacteriales	Cardiovascular aging	MR-PRESSO	3	0.0556095	0.506484	0.91786								rs11652058; rs4234207; rs550057
k__Bacteria.p__Actinobacteria.c__Actinobacteria.o__Coriobacteriales	Cardiovascular aging	Weighted median	3	0.339891	0.602443	0.572627								rs11652058; rs4234207; rs550057
k__Bacteria.p__Firmicutes.c__Negativicutes.o__Selenomonadales	Cardiovascular aging	MR Egger	3	-0.466614	1.51006	0.809208	0.0280235	0.190682	0.907105					rs12979658; rs77764206; rs78791321
k__Bacteria.p__Firmicutes.c__Negativicutes.o__Selenomonadales	Cardiovascular aging	Inverse variance weighted	3	-0.254326	0.440155	0.563393				0.0978842	2	0.952236	0.956349	rs12979658; rs77764206; rs78791321
k__Bacteria.p__Firmicutes.c__Negativicutes.o__Selenomonadales	Cardiovascular aging	MR-PRESSO	3											rs12979658; rs77764206; rs78791321
k__Bacteria.p__Firmicutes.c__Negativicutes.o__Selenomonadales	Cardiovascular aging	Weighted median	3	-0.196106	0.503809	0.697093								rs12979658; rs77764206; rs78791321
k__Bacteria.p__Actinobacteria	Cardiovascular aging	MR Egger	3	-1.26483	2.38267	0.689319	0.149829	0.253773	0.660468					rs35344390; rs74452406; rs926010
k__Bacteria.p__Actinobacteria	Cardiovascular aging	Inverse variance weighted	3	0.116348	0.45221	0.796957				0.778894	2	0.677431	0.956349	rs35344390; rs74452406; rs926010
k__Bacteria.p__Actinobacteria	Cardiovascular aging	MR-PRESSO	3	-0.142297	0.321214	0.687766								rs35344390; rs74452406; rs926010
k__Bacteria.p__Actinobacteria	Cardiovascular aging	Weighted median	3	0.168195	0.535263	0.753347								rs35344390; rs74452406; rs926010
k__Bacteria.p__Actinobacteria.c__Actinobacteria.o__Bifidobacteriales.f__Bifidobacteriaceae.g__Bifidobacterium.s__Bifidobacterium_adolescentis	Cardiovascular aging	MR Egger	5	-0.503961	2.14453	0.829337	0.0707213	0.232457	0.780832					rs11986537; rs4256405; rs4351047; rs4646215; rs74394156
k__Bacteria.p__Actinobacteria.c__Actinobacteria.o__Bifidobacteriales.f__Bifidobacteriaceae.g__Bifidobacterium.s__Bifidobacterium_adolescentis	Cardiovascular aging	Inverse variance weighted	5	0.126112	0.489485	0.796682				8.95397	4	0.0622602	0.956349	rs11986537; rs4256405; rs4351047; rs4646215; rs74394156
k__Bacteria.p__Actinobacteria.c__Actinobacteria.o__Bifidobacteriales.f__Bifidobacteriaceae.g__Bifidobacterium.s__Bifidobacterium_adolescentis	Cardiovascular aging	MR-PRESSO	5	0.126112	0.489485	0.809394								rs11986537; rs4256405; rs4351047; rs4646215; rs74394156
k__Bacteria.p__Actinobacteria.c__Actinobacteria.o__Bifidobacteriales.f__Bifidobacteriaceae.g__Bifidobacterium.s__Bifidobacterium_adolescentis	Cardiovascular aging	Weighted median	5	0.0787727	0.473057	0.867749								rs11986537; rs4256405; rs4351047; rs4646215; rs74394156
k__Bacteria.p__Actinobacteria.c__Actinobacteria.o__Bifidobacteriales.f__Bifidobacteriaceae.g__Bifidobacterium.s__Bifidobacterium_bifidum	Cardiovascular aging	MR Egger	8	0.497216	0.481725	0.341796	-0.112615	0.102571	0.314333					rs17453521; rs4861647; rs59340188; rs62555927; rs722497; rs7334864; rs849116; rs9848175
k__Bacteria.p__Actinobacteria.c__Actinobacteria.o__Bifidobacteriales.f__Bifidobacteriaceae.g__Bifidobacterium.s__Bifidobacterium_bifidum	Cardiovascular aging	Inverse variance weighted	8	-0.00705478	0.145281	0.96127				2.09678	7	0.95429	0.971164	rs17453521; rs4861647; rs59340188; rs62555927; rs722497; rs7334864; rs849116; rs9848175
k__Bacteria.p__Actinobacteria.c__Actinobacteria.o__Bifidobacteriales.f__Bifidobacteriaceae.g__Bifidobacterium.s__Bifidobacterium_bifidum	Cardiovascular aging	MR-PRESSO	8	-0.00705478	0.0795128	0.931786								rs17453521; rs4861647; rs59340188; rs62555927; rs722497; rs7334864; rs849116; rs9848175
k__Bacteria.p__Actinobacteria.c__Actinobacteria.o__Bifidobacteriales.f__Bifidobacteriaceae.g__Bifidobacterium.s__Bifidobacterium_bifidum	Cardiovascular aging	Weighted median	8	0.0335359	0.179473	0.851772								rs17453521; rs4861647; rs59340188; rs62555927; rs722497; rs7334864; rs849116; rs9848175
k__Bacteria.p__Actinobacteria.c__Actinobacteria.o__Bifidobacteriales.f__Bifidobacteriaceae.g__Bifidobacterium.s__Bifidobacterium_longum	Cardiovascular aging	MR Egger	5	-2.72868	2.29546	0.320067	0.34611	0.252036	0.263309					rs10033190; rs13391731; rs1446585; rs6780177; rs73412051
k__Bacteria.p__Actinobacteria.c__Actinobacteria.o__Bifidobacteriales.f__Bifidobacteriaceae.g__Bifidobacterium.s__Bifidobacterium_longum	Cardiovascular aging	Inverse variance weighted	5	0.371176	0.460608	0.420336				7.60725	4	0.107072	0.8981	rs10033190; rs13391731; rs1446585; rs6780177; rs73412051
k__Bacteria.p__Actinobacteria.c__Actinobacteria.o__Bifidobacteriales.f__Bifidobacteriaceae.g__Bifidobacterium.s__Bifidobacterium_longum	Cardiovascular aging	MR-PRESSO	5	0.257113	0.365133	0.512766								rs10033190; rs13391731; rs1446585; rs6780177; rs73412051
k__Bacteria.p__Actinobacteria.c__Actinobacteria.o__Bifidobacteriales.f__Bifidobacteriaceae.g__Bifidobacterium.s__Bifidobacterium_longum	Cardiovascular aging	Weighted median	5	0.694032	0.475358	0.144285								rs10033190; rs13391731; rs1446585; rs6780177; rs73412051
k__Bacteria.p__Actinobacteria.c__Actinobacteria.o__Coriobacteriales.f__Coriobacteriaceae.g__Collinsella.s__Collinsella_aerofaciens	Cardiovascular aging	MR Egger	3	-3.17241	11.4916	0.828524	0.326272	1.2573	0.838361					rs386274; rs550057; rs72845940
k__Bacteria.p__Actinobacteria.c__Actinobacteria.o__Coriobacteriales.f__Coriobacteriaceae.g__Collinsella.s__Collinsella_aerofaciens	Cardiovascular aging	Inverse variance weighted	3	-0.202383	0.754441	0.788502				6.5151	2	0.0384826	0.956349	rs386274; rs550057; rs72845940
k__Bacteria.p__Actinobacteria.c__Actinobacteria.o__Coriobacteriales.f__Coriobacteriaceae.g__Collinsella.s__Collinsella_aerofaciens	Cardiovascular aging	MR-PRESSO	3											rs386274; rs550057; rs72845940
k__Bacteria.p__Actinobacteria.c__Actinobacteria.o__Coriobacteriales.f__Coriobacteriaceae.g__Collinsella.s__Collinsella_aerofaciens	Cardiovascular aging	Weighted median	3	-0.0154646	0.610878	0.979803								rs386274; rs550057; rs72845940
k__Bacteria.p__Bacteroidetes.c__Bacteroidia.o__Bacteroidales.f__Rikenellaceae.g__Alistipes.s__Alistipes_sp_AP11	Cardiovascular aging	MR Egger	3	-0.165857	1.70242	0.938173	0.0250998	0.357462	0.955372					rs12022867; rs13333427; rs28450200
k__Bacteria.p__Bacteroidetes.c__Bacteroidia.o__Bacteroidales.f__Rikenellaceae.g__Alistipes.s__Alistipes_sp_AP11	Cardiovascular aging	Inverse variance weighted	3	-0.0478382	0.270506	0.859629				0.208579	2	0.900965	0.967082	rs12022867; rs13333427; rs28450200
k__Bacteria.p__Bacteroidetes.c__Bacteroidia.o__Bacteroidales.f__Rikenellaceae.g__Alistipes.s__Alistipes_sp_AP11	Cardiovascular aging	MR-PRESSO	3											rs12022867; rs13333427; rs28450200
k__Bacteria.p__Bacteroidetes.c__Bacteroidia.o__Bacteroidales.f__Rikenellaceae.g__Alistipes.s__Alistipes_sp_AP11	Cardiovascular aging	Weighted median	3	-0.0833854	0.308417	0.786879								rs12022867; rs13333427; rs28450200
k__Bacteria.p__Proteobacteria.c__Gammaproteobacteria.o__Enterobacteriales.f__Enterobacteriaceae.g__Escherichia.s__Escherichia_unclassified	Cardiovascular aging	MR Egger	3	2.23189	1.11585	0.295146	-0.331189	0.153451	0.27622					rs115534005; rs12300342; rs2791437
k__Bacteria.p__Proteobacteria.c__Gammaproteobacteria.o__Enterobacteriales.f__Enterobacteriaceae.g__Escherichia.s__Escherichia_unclassified	Cardiovascular aging	Inverse variance weighted	3	-0.0630728	0.5554	0.909584				5.39024	2	0.0675342	0.971164	rs115534005; rs12300342; rs2791437
k__Bacteria.p__Proteobacteria.c__Gammaproteobacteria.o__Enterobacteriales.f__Enterobacteriaceae.g__Escherichia.s__Escherichia_unclassified	Cardiovascular aging	MR-PRESSO	3	-0.00388282	0.411533	0.993064								rs115534005; rs12300342; rs2791437
k__Bacteria.p__Proteobacteria.c__Gammaproteobacteria.o__Enterobacteriales.f__Enterobacteriaceae.g__Escherichia.s__Escherichia_unclassified	Cardiovascular aging	Weighted median	3	-0.423934	0.480791	0.377915								rs115534005; rs12300342; rs2791437

## Sheet: g.MR_Frailty
Legend: This table lists MR results when using Frailty as outcome. For taxa and pathways tested, we show the results of IVW, WM, MR-PRESSO tests. MR-Egger was run to derive the intercept for evaluating pleiotropy, but for completeness also the causal estimate is reported. For IVW, the Cochran's Q test results are also shown. The pval_adj column reports the IVW adjusted pvalue after multiple testi…
exposure	outcome	method	nsnp	beta_c	se	pval	egger_intercept.ple	se.ple	pval.ple	Q.het	Q_df.het	Q_pval.het	pval_adj	IV_list
ASPASN.PWY..superpathway.of.L.aspartate.and.L.asparagine.biosynthesis	Frailty	MR Egger	5	-0.415921	0.24435	0.187281	0.0374723	0.0225999	0.195883					rs113902391; rs12490065; rs2846765; rs820496; rs9545502
k__Bacteria.p__Actinobacteria	Frailty	Inverse variance weighted	7	0.0343268	0.0156127	0.0279026				1.31806	6	0.970653	0.366875	rs12955365; rs2197344; rs35344390; rs6044857; rs61939486; rs74452406; rs926010
ASPASN.PWY..superpathway.of.L.aspartate.and.L.asparagine.biosynthesis	Frailty	MR-PRESSO	5	-0.0121129	0.0238175	0.63782								rs113902391; rs12490065; rs2846765; rs820496; rs9545502
ASPASN.PWY..superpathway.of.L.aspartate.and.L.asparagine.biosynthesis	Frailty	Weighted median	5	0.00648001	0.0268192	0.809076								rs113902391; rs12490065; rs2846765; rs820496; rs9545502
ENTBACSYN.PWY..enterobactin.biosynthesis	Frailty	Wald ratio	1	0.0146826	0.0194328	0.449916							0.977708	rs706111
ENTBACSYN.PWY..enterobactin.biosynthesis	Frailty	MR-PRESSO	1											rs706111
GLYCOCAT.PWY..glycogen.degradation.I..bacterial.	Frailty	MR Egger	5	0.0217412	0.110195	0.856205	-0.00324386	0.0125133	0.812226					rs115001375; rs2056101; rs35296932; rs41474647; rs59657730
k__Bacteria.p__Actinobacteria	Frailty	MR Egger	7	0.0110027	0.0819103	0.898384	0.00229852	0.00792402	0.783408					rs12955365; rs2197344; rs35344390; rs6044857; rs61939486; rs74452406; rs926010
GLYCOCAT.PWY..glycogen.degradation.I..bacterial.	Frailty	Weighted median	5	-0.0177442	0.0213352	0.405588								rs115001375; rs2056101; rs35296932; rs41474647; rs59657730
GLYCOCAT.PWY..glycogen.degradation.I..bacterial.	Frailty	MR-PRESSO	5	-0.00621513	0.0198323	0.769651								rs115001375; rs2056101; rs35296932; rs41474647; rs59657730
HISDEG.PWY..L.histidine.degradation.I	Frailty	MR Egger	7	-0.000895521	0.211047	0.996778	-0.00451666	0.0213999	0.841173					rs11948304; rs12137024; rs1501270; rs2175835; rs3095927; rs6783574; rs9275187
k__Bacteria.p__Actinobacteria	Frailty	MR-PRESSO	7	0.0343268	0.0073176	0.00335736								rs12955365; rs2197344; rs35344390; rs6044857; rs61939486; rs74452406; rs926010
HISDEG.PWY..L.histidine.degradation.I	Frailty	Weighted median	7	-0.0199421	0.0209979	0.342254								rs11948304; rs12137024; rs1501270; rs2175835; rs3095927; rs6783574; rs9275187
HISDEG.PWY..L.histidine.degradation.I	Frailty	MR-PRESSO	6	-0.0398466	0.0409023	0.362416								rs11948304; rs12137024; rs1501270; rs2175835; rs3095927; rs6783574; rs9275187
HISTSYN.PWY..L.histidine.biosynthesis	Frailty	MR Egger	5	-0.00620662	0.0512938	0.911339	0.00138613	0.00638448	0.84205					rs10005886; rs10772275; rs12098656; rs7145596; rs78778914
k__Bacteria.p__Actinobacteria	Frailty	Weighted median	7	0.0303527	0.0198792	0.126796								rs12955365; rs2197344; rs35344390; rs6044857; rs61939486; rs74452406; rs926010
HISTSYN.PWY..L.histidine.biosynthesis	Frailty	Weighted median	5	0.0178892	0.0223062	0.422562								rs10005886; rs10772275; rs12098656; rs7145596; rs78778914
HISTSYN.PWY..L.histidine.biosynthesis	Frailty	MR-PRESSO	5	0.0041406	0.0144961	0.789339								rs10005886; rs10772275; rs12098656; rs7145596; rs78778914
k__Bacteria.p__Actinobacteria.c__Actinobacteria	Frailty	Inverse variance weighted	7	0.034328	0.015613	0.0279003				1.31791	6	0.970661	0.366875	rs12955365; rs2197344; rs35344390; rs6044857; rs61939486; rs74452406; rs926010
PYRIDNUCSYN.PWY..NAD.biosynthesis.I..from.aspartate.	Frailty	Inverse variance weighted	8	0.0343406	0.0176194	0.0512932				10.0973	7	0.183125	0.366875	rs1126742; rs12871823; rs143920868; rs148280750; rs169503; rs74459573; rs8045981; rs9811455
k__Bacteria.p__Actinobacteria.c__Actinobacteria	Frailty	MR Egger	7	0.0110173	0.0819081	0.898247	0.00229715	0.00792366	0.783523					rs12955365; rs2197344; rs35344390; rs6044857; rs61939486; rs74452406; rs926010
k__Bacteria.p__Actinobacteria.c__Actinobacteria	Frailty	MR-PRESSO	7	0.034328	0.00731734	0.00335624								rs12955365; rs2197344; rs35344390; rs6044857; rs61939486; rs74452406; rs926010
k__Bacteria.p__Actinobacteria.c__Actinobacteria	Frailty	Weighted median	7	0.030357	0.0198358	0.125914								rs12955365; rs2197344; rs35344390; rs6044857; rs61939486; rs74452406; rs926010
PWY.6708..ubiquinol.8.biosynthesis..prokaryotic.	Frailty	Inverse variance weighted	6	0.0201398	0.0106869	0.0594932				4.78913	5	0.442154	0.366875	rs113976504; rs11898768; rs12550124; rs1624064; rs2636908; rs3750879
P105.PWY..TCA.cycle.IV..2.oxoglutarate.decarboxylase.	Frailty	Inverse variance weighted	2	0.0397525	0.0195863	0.042397				1.20738	1	0.271852	0.366875	rs36182340; rs72814612
P105.PWY..TCA.cycle.IV..2.oxoglutarate.decarboxylase.	Frailty	MR-PRESSO	2											rs36182340; rs72814612
k__Bacteria.p__Actinobacteria.c__Actinobacteria.o__Bifidobacteriales	Frailty	MR Egger	5	-0.00454736	0.0647444	0.948426	0.000737285	0.00621781	0.913105					rs10455532; rs12657170; rs4851317; rs4859454; rs74452406
PWY.6353..purine.nucleotides.degradation.II..aerobic.	Frailty	Inverse variance weighted	9	-0.0250655	0.015698	0.110325				10.2855	8	0.245559	0.583146	rs10801008; rs12201310; rs12336386; rs132685; rs2137304; rs2895633; rs396769; rs4551833; rs7527876
k__Bacteria.p__Actinobacteria.c__Actinobacteria.o__Bifidobacteriales	Frailty	Weighted median	5	0.00509314	0.0232196	0.82638								rs10455532; rs12657170; rs4851317; rs4859454; rs74452406
k__Bacteria.p__Actinobacteria.c__Actinobacteria.o__Bifidobacteriales	Frailty	MR-PRESSO	5	0.0028152	0.0139726	0.850154								rs10455532; rs12657170; rs4851317; rs4859454; rs74452406
k__Bacteria.p__Actinobacteria.c__Actinobacteria.o__Bifidobacteriales.f__Bifidobacteriaceae	Frailty	MR Egger	5	-0.0045302	0.0647036	0.948588	0.000735689	0.006214	0.913239					rs10455532; rs12657170; rs4851317; rs4859454; rs74452406
k__Bacteria.p__Bacteroidetes.c__Bacteroidia.o__Bacteroidales.f__Rikenellaceae.g__Alistipes.s__Alistipes_sp_AP11	Frailty	Inverse variance weighted	4	0.0167787	0.0124879	0.179078				1.35357	3	0.716452	0.800903	rs12022867; rs13333427; rs1553042; rs28450200
k__Bacteria.p__Actinobacteria.c__Actinobacteria.o__Bifidobacteriales.f__Bifidobacteriaceae	Frailty	Weighted median	5	0.00509162	0.0238021	0.830614								rs10455532; rs12657170; rs4851317; rs4859454; rs74452406
k__Bacteria.p__Actinobacteria.c__Actinobacteria.o__Bifidobacteriales.f__Bifidobacteriaceae	Frailty	MR-PRESSO	5	0.0028159	0.0139723	0.850114								rs10455532; rs12657170; rs4851317; rs4859454; rs74452406
k__Bacteria.p__Actinobacteria.c__Actinobacteria.o__Bifidobacteriales.f__Bifidobacteriaceae.g__Bifidobacterium	Frailty	MR Egger	5	0.0155605	0.0632394	0.821513	-0.00169941	0.00640288	0.807884					rs10455532; rs12657170; rs4472164; rs4859454; rs74452406
k__Bacteria.p__Actinobacteria.c__Actinobacteria.o__Bifidobacteriales.f__Bifidobacteriaceae.g__Bifidobacterium.s__Bifidobacterium_bifidum	Frailty	Inverse variance weighted	11	-0.00812419	0.00637424	0.202474				9.29151	10	0.50468	0.800903	rs11630244; rs17453521; rs4861647; rs59340188; rs62555927; rs722497; rs7334864; rs8176645; rs849116; rs9525230; rs9848175
k__Bacteria.p__Actinobacteria.c__Actinobacteria.o__Bifidobacteriales.f__Bifidobacteriaceae.g__Bifidobacterium	Frailty	Weighted median	5	0.00570108	0.0227072	0.801761								rs10455532; rs12657170; rs4472164; rs4859454; rs74452406
k__Bacteria.p__Actinobacteria.c__Actinobacteria.o__Bifidobacteriales.f__Bifidobacteriaceae.g__Bifidobacterium	Frailty	MR-PRESSO	5	-0.000474617	0.0125345	0.97161								rs10455532; rs12657170; rs4472164; rs4859454; rs74452406
k__Bacteria.p__Actinobacteria.c__Actinobacteria.o__Bifidobacteriales.f__Bifidobacteriaceae.g__Bifidobacterium.s__Bifidobacterium_adolescentis	Frailty	MR Egger	7	-0.0454755	0.0874782	0.625355	0.00527857	0.00901212	0.583503					rs11986537; rs4110696; rs4256405; rs4351047; rs4646215; rs74394156; rs8045380
k__Bacteria.p__Actinobacteria.c__Actinobacteria.o__Coriobacteriales.f__Coriobacteriaceae.g__Collinsella.s__Collinsella_aerofaciens	Frailty	Inverse variance weighted	3	0.0475939	0.0395115	0.228374				6.49437	2	0.0388835	0.800903	rs386274; rs550057; rs72845940
k__Bacteria.p__Actinobacteria.c__Actinobacteria.o__Bifidobacteriales.f__Bifidobacteriaceae.g__Bifidobacterium.s__Bifidobacterium_adolescentis	Frailty	Weighted median	7	0.00638698	0.0214222	0.765591								rs11986537; rs4110696; rs4256405; rs4351047; rs4646215; rs74394156; rs8045380
k__Bacteria.p__Actinobacteria.c__Actinobacteria.o__Bifidobacteriales.f__Bifidobacteriaceae.g__Bifidobacterium.s__Bifidobacterium_adolescentis	Frailty	MR-PRESSO	7	0.00437063	0.0191079	0.826673								rs11986537; rs4110696; rs4256405; rs4351047; rs4646215; rs74394156; rs8045380
k__Bacteria.p__Actinobacteria.c__Actinobacteria.o__Bifidobacteriales.f__Bifidobacteriaceae.g__Bifidobacterium.s__Bifidobacterium_bifidum	Frailty	MR Egger	11	-0.0332293	0.0226591	0.176565	0.00552627	0.00478642	0.278					rs11630244; rs17453521; rs4861647; rs59340188; rs62555927; rs722497; rs7334864; rs8176645; rs849116; rs9525230; rs9848175
k__Bacteria.p__Actinobacteria.c__Actinobacteria.o__Coriobacteriales.f__Coriobacteriaceae	Frailty	Inverse variance weighted	7	0.025693	0.0233702	0.271596				13.3968	6	0.0371502	0.800903	rs11652058; rs28806584; rs2907732; rs4234207; rs550057; rs78362376; rs976260
k__Bacteria.p__Actinobacteria.c__Actinobacteria.o__Bifidobacteriales.f__Bifidobacteriaceae.g__Bifidobacterium.s__Bifidobacterium_bifidum	Frailty	MR-PRESSO	11	-0.00812419	0.00614429	0.215534								rs11630244; rs17453521; rs4861647; rs59340188; rs62555927; rs722497; rs7334864; rs8176645; rs849116; rs9525230; rs9848175
k__Bacteria.p__Actinobacteria.c__Actinobacteria.o__Bifidobacteriales.f__Bifidobacteriaceae.g__Bifidobacterium.s__Bifidobacterium_bifidum	Frailty	Weighted median	11	-0.00864479	0.00915568	0.345068								rs11630244; rs17453521; rs4861647; rs59340188; rs62555927; rs722497; rs7334864; rs8176645; rs849116; rs9525230; rs9848175
k__Bacteria.p__Actinobacteria.c__Actinobacteria.o__Bifidobacteriales.f__Bifidobacteriaceae.g__Bifidobacterium.s__Bifidobacterium_longum	Frailty	MR Egger	5	0.0101246	0.0708916	0.895487	-0.000657318	0.00839579	0.942526					rs10033190; rs13391731; rs6780177; rs73412051; rs7761703
k__Bacteria.p__Actinobacteria.c__Actinobacteria.o__Coriobacteriales	Frailty	Inverse variance weighted	7	0.025686	0.0233709	0.271742				13.3982	6	0.0371313	0.800903	rs11652058; rs28806584; rs2907732; rs4234207; rs550057; rs78362376; rs976260
k__Bacteria.p__Actinobacteria.c__Actinobacteria.o__Bifidobacteriales.f__Bifidobacteriaceae.g__Bifidobacterium.s__Bifidobacterium_longum	Frailty	MR-PRESSO	5	0.00473264	0.0118347	0.70967								rs10033190; rs13391731; rs6780177; rs73412051; rs7761703
k__Bacteria.p__Actinobacteria.c__Actinobacteria.o__Bifidobacteriales.f__Bifidobacteriaceae.g__Bifidobacterium.s__Bifidobacterium_longum	Frailty	Weighted median	5	0.00471538	0.0203968	0.817173								rs10033190; rs13391731; rs6780177; rs73412051; rs7761703
k__Bacteria.p__Actinobacteria.c__Actinobacteria.o__Coriobacteriales	Frailty	MR Egger	7	0.27579	0.132614	0.0921037	-0.0247724	0.0129927	0.114881					rs11652058; rs28806584; rs2907732; rs4234207; rs550057; rs78362376; rs976260
k__Bacteria.p__Proteobacteria.c__Gammaproteobacteria.o__Enterobacteriales.f__Enterobacteriaceae.g__Escherichia.s__Escherichia_unclassified	Frailty	Inverse variance weighted	5	-0.0171314	0.0161222	0.287966				4.89606	4	0.298129	0.800903	rs10900435; rs115534005; rs12300342; rs12700345; rs2791437
k__Bacteria.p__Actinobacteria.c__Actinobacteria.o__Coriobacteriales	Frailty	MR-PRESSO	6	0.025686	0.0233709	0.313875								rs11652058; rs28806584; rs2907732; rs4234207; rs78362376; rs976260
k__Bacteria.p__Actinobacteria.c__Actinobacteria.o__Coriobacteriales	Frailty	Weighted median	7	0.0164234	0.0239595	0.49305								rs11652058; rs28806584; rs2907732; rs4234207; rs550057; rs78362376; rs976260
k__Bacteria.p__Actinobacteria.c__Actinobacteria.o__Coriobacteriales.f__Coriobacteriaceae	Frailty	MR Egger	7	0.275741	0.132474	0.09189	-0.0247667	0.0129787	0.114643					rs11652058; rs28806584; rs2907732; rs4234207; rs550057; rs78362376; rs976260
TRPSYN.PWY..L.tryptophan.biosynthesis	Frailty	Inverse variance weighted	5	0.0296759	0.0288136	0.303044				9.12874	4	0.057961	0.800903	rs17399145; rs1990421; rs2935713; rs55893824; rs62241211
k__Bacteria.p__Actinobacteria.c__Actinobacteria.o__Coriobacteriales.f__Coriobacteriaceae	Frailty	MR-PRESSO	6	0.025693	0.0233702	0.31374								rs11652058; rs28806584; rs2907732; rs4234207; rs78362376; rs976260
k__Bacteria.p__Actinobacteria.c__Actinobacteria.o__Coriobacteriales.f__Coriobacteriaceae	Frailty	Weighted median	7	0.0164385	0.0232217	0.479011								rs11652058; rs28806584; rs2907732; rs4234207; rs550057; rs78362376; rs976260
k__Bacteria.p__Actinobacteria.c__Actinobacteria.o__Coriobacteriales.f__Coriobacteriaceae.g__Collinsella	Frailty	MR Egger	5	0.504896	0.224048	0.109581	-0.051958	0.0239522	0.118541					rs11782083; rs550057; rs6099022; rs7831606; rs976260
HISDEG.PWY..L.histidine.degradation.I	Frailty	Inverse variance weighted	7	-0.0441147	0.0468384	0.34627				57.5344	6	1.42399e-10	0.854131	rs11948304; rs12137024; rs1501270; rs2175835; rs3095927; rs6783574; rs9275187
k__Bacteria.p__Actinobacteria.c__Actinobacteria.o__Coriobacteriales.f__Coriobacteriaceae.g__Collinsella	Frailty	MR-PRESSO	5	0.0212592	0.0307204	0.526996								rs11782083; rs550057; rs6099022; rs7831606; rs976260
k__Bacteria.p__Actinobacteria.c__Actinobacteria.o__Coriobacteriales.f__Coriobacteriaceae.g__Collinsella	Frailty	Weighted median	5	-0.00640954	0.0246849	0.79513								rs11782083; rs550057; rs6099022; rs7831606; rs976260
k__Bacteria.p__Actinobacteria.c__Actinobacteria.o__Coriobacteriales.f__Coriobacteriaceae.g__Collinsella.s__Collinsella_aerofaciens	Frailty	MR Egger	3	0.019852	0.622323	0.979699	0.00305066	0.0681584	0.971525					rs386274; rs550057; rs72845940
PWY.6147..6.hydroxymethyl.dihydropterin.diphosphate.biosynthesis.I	Frailty	Inverse variance weighted	7	-0.0165117	0.0190113	0.38511				9.07267	6	0.169532	0.890566	rs10792007; rs11732083; rs1366290; rs1940600; rs2548882; rs2714053; rs73401412
k__Bacteria.p__Actinobacteria.c__Actinobacteria.o__Coriobacteriales.f__Coriobacteriaceae.g__Collinsella.s__Collinsella_aerofaciens	Frailty	Weighted median	3	0.00713496	0.0333257	0.830471								rs386274; rs550057; rs72845940
k__Bacteria.p__Actinobacteria.c__Actinobacteria.o__Coriobacteriales.f__Coriobacteriaceae.g__Collinsella.s__Collinsella_aerofaciens	Frailty	MR-PRESSO	3											rs386274; rs550057; rs72845940
k__Bacteria.p__Bacteroidetes.c__Bacteroidia.o__Bacteroidales.f__Rikenellaceae	Frailty	MR Egger	3	-0.133164	0.0909756	0.38156	0.0191243	0.011418	0.342656					rs11211406; rs2465506; rs73344869
k__Bacteria.p__Actinobacteria.c__Actinobacteria.o__Coriobacteriales.f__Coriobacteriaceae.g__Collinsella	Frailty	Inverse variance weighted	5	0.0212592	0.0307204	0.488923				12.6973	4	0.0128535	0.977708	rs11782083; rs550057; rs6099022; rs7831606; rs976260
k__Bacteria.p__Bacteroidetes.c__Bacteroidia.o__Bacteroidales.f__Rikenellaceae	Frailty	Weighted median	3	0.00175898	0.0320546	0.956238								rs11211406; rs2465506; rs73344869
k__Bacteria.p__Bacteroidetes.c__Bacteroidia.o__Bacteroidales.f__Rikenellaceae	Frailty	MR-PRESSO	3											rs11211406; rs2465506; rs73344869
k__Bacteria.p__Bacteroidetes.c__Bacteroidia.o__Bacteroidales.f__Rikenellaceae.g__Alistipes	Frailty	MR Egger	3	-0.133053	0.0910435	0.382027	0.019161	0.0114589	0.343121					rs11211406; rs2465506; rs73344869
ASPASN.PWY..superpathway.of.L.aspartate.and.L.asparagine.biosynthesis	Frailty	Inverse variance weighted	5	-0.0121129	0.0238175	0.611053				6.79042	4	0.147387	0.977708	rs113902391; rs12490065; rs2846765; rs820496; rs9545502
k__Bacteria.p__Bacteroidetes.c__Bacteroidia.o__Bacteroidales.f__Rikenellaceae.g__Alistipes	Frailty	Weighted median	3	0.00186965	0.0333004	0.955226								rs11211406; rs2465506; rs73344869
k__Bacteria.p__Bacteroidetes.c__Bacteroidia.o__Bacteroidales.f__Rikenellaceae.g__Alistipes	Frailty	MR-PRESSO	3											rs11211406; rs2465506; rs73344869
k__Bacteria.p__Bacteroidetes.c__Bacteroidia.o__Bacteroidales.f__Rikenellaceae.g__Alistipes.s__Alistipes_sp_AP11	Frailty	MR Egger	4	0.0081335	0.054721	0.895474	0.00164878	0.0101608	0.886007					rs12022867; rs13333427; rs1553042; rs28450200
k__Bacteria.p__Bacteroidetes.c__Bacteroidia.o__Bacteroidales.f__Rikenellaceae.g__Alistipes	Frailty	Inverse variance weighted	3	0.0136549	0.0291115	0.639031				2.86683	2	0.238493	0.977708	rs11211406; rs2465506; rs73344869
k__Bacteria.p__Bacteroidetes.c__Bacteroidia.o__Bacteroidales.f__Rikenellaceae.g__Alistipes.s__Alistipes_sp_AP11	Frailty	MR-PRESSO	4	0.0167787	0.0083882	0.139289								rs12022867; rs13333427; rs1553042; rs28450200
k__Bacteria.p__Bacteroidetes.c__Bacteroidia.o__Bacteroidales.f__Rikenellaceae.g__Alistipes.s__Alistipes_sp_AP11	Frailty	Weighted median	4	0.00922184	0.015295	0.546555								rs12022867; rs13333427; rs1553042; rs28450200
k__Bacteria.p__Firmicutes.c__Negativicutes	Frailty	MR Egger	5	-0.0841431	0.0744341	0.340501	0.00957826	0.00879854	0.355956					rs12472147; rs12979658; rs2282037; rs77764206; rs78791321
k__Bacteria.p__Bacteroidetes.c__Bacteroidia.o__Bacteroidales.f__Rikenellaceae	Frailty	Inverse variance weighted	3	0.013638	0.029207	0.640541				2.86939	2	0.238188	0.977708	rs11211406; rs2465506; rs73344869
k__Bacteria.p__Firmicutes.c__Negativicutes	Frailty	MR-PRESSO	5	-0.00534966	0.0164188	0.76089								rs12472147; rs12979658; rs2282037; rs77764206; rs78791321
k__Bacteria.p__Firmicutes.c__Negativicutes	Frailty	Weighted median	5	-0.00276204	0.0226285	0.902851								rs12472147; rs12979658; rs2282037; rs77764206; rs78791321
k__Bacteria.p__Firmicutes.c__Negativicutes.o__Selenomonadales	Frailty	MR Egger	5	-0.0841519	0.0744368	0.340473	0.00957902	0.00879862	0.355928					rs12472147; rs12979658; rs2282037; rs77764206; rs78791321
PWY_REDCITCYC..TCA.cycle.VIII..helicobacter.	Frailty	Inverse variance weighted	7	0.00641833	0.0156752	0.682205				11.2546	6	0.0808186	0.977708	rs10159356; rs12035973; rs2420153; rs3923652; rs61545203; rs8057488; rs9965721
k__Bacteria.p__Firmicutes.c__Negativicutes.o__Selenomonadales	Frailty	MR-PRESSO	5	-0.00535006	0.0164192	0.760878								rs12472147; rs12979658; rs2282037; rs77764206; rs78791321
k__Bacteria.p__Firmicutes.c__Negativicutes.o__Selenomonadales	Frailty	Weighted median	5	-0.00276228	0.0226099	0.902763								rs12472147; rs12979658; rs2282037; rs77764206; rs78791321
k__Bacteria.p__Proteobacteria.c__Gammaproteobacteria.o__Enterobacteriales.f__Enterobacteriaceae.g__Escherichia.s__Escherichia_unclassified	Frailty	MR Egger	5	-0.030678	0.0667223	0.676943	0.00174927	0.00827883	0.846197					rs10900435; rs115534005; rs12300342; rs12700345; rs2791437
GLYCOCAT.PWY..glycogen.degradation.I..bacterial.	Frailty	Inverse variance weighted	5	-0.00621513	0.0198323	0.753989				6.454	4	0.167712	0.977708	rs115001375; rs2056101; rs35296932; rs41474647; rs59657730
k__Bacteria.p__Proteobacteria.c__Gammaproteobacteria.o__Enterobacteriales.f__Enterobacteriaceae.g__Escherichia.s__Escherichia_unclassified	Frailty	Weighted median	5	-0.0244855	0.0190281	0.19816								rs10900435; rs115534005; rs12300342; rs12700345; rs2791437
k__Bacteria.p__Proteobacteria.c__Gammaproteobacteria.o__Enterobacteriales.f__Enterobacteriaceae.g__Escherichia.s__Escherichia_unclassified	Frailty	MR-PRESSO	5	-0.0171314	0.0161222	0.347861								rs10900435; rs115534005; rs12300342; rs12700345; rs2791437
LACTOSECAT.PWY..lactose.and.galactose.degradation.I	Frailty	MR Egger	8	0.100882	0.0675803	0.186106	-0.014528	0.00967856	0.184018					rs118184992; rs17034687; rs191667368; rs4960590; rs507666; rs7147611; rs80205307; rs9982657
k__Bacteria.p__Firmicutes.c__Negativicutes.o__Selenomonadales	Frailty	Inverse variance weighted	5	-0.00535006	0.0173696	0.758072				3.57427	4	0.466676	0.977708	rs12472147; rs12979658; rs2282037; rs77764206; rs78791321
LACTOSECAT.PWY..lactose.and.galactose.degradation.I	Frailty	Weighted median	8	0.0163518	0.0201583	0.417269								rs118184992; rs17034687; rs191667368; rs4960590; rs507666; rs7147611; rs80205307; rs9982657
LACTOSECAT.PWY..lactose.and.galactose.degradation.I	Frailty	MR-PRESSO	7	-0.000939916	0.0195258	0.962787								rs118184992; rs17034687; rs191667368; rs4960590; rs507666; rs7147611; rs80205307; rs9982657
k__Bacteria.p__Firmicutes.c__Negativicutes	Frailty	Inverse variance weighted	5	-0.00534966	0.0173691	0.758084				3.57428	4	0.466674	0.977708	rs12472147; rs12979658; rs2282037; rs77764206; rs78791321
PWY.7209..superpathway.of.pyrimidine.ribonucleosides.degradation	Frailty	Inverse variance weighted	10	-0.0233433	0.0111146	0.0357088				9.40012	9	0.401188	0.366875	rs10489050; rs11215429; rs11242123; rs1474383; rs261555; rs4783336; rs617079; rs6587723; rs6805759; rs836868
PWY.5088..L.glutamate.degradation.VIII..to.propanoate.	Frailty	MR Egger	4	-0.00791761	0.0307587	0.820926	0.00228193	0.00761683	0.792757					rs11732315; rs12028490; rs2127754; rs9927590
PWY.6151..S.adenosyl.L.methionine.cycle.I	Frailty	Inverse variance weighted	8	0.00513421	0.0168449	0.760523				9.32133	7	0.230402	0.977708	rs116996492; rs12530267; rs1751578; rs2235334; rs2827430; rs62314649; rs6879880; rs7513344
PWY.5088..L.glutamate.degradation.VIII..to.propanoate.	Frailty	Weighted median	4	0.00409945	0.0115133	0.721793								rs11732315; rs12028490; rs2127754; rs9927590
PWY.5088..L.glutamate.degradation.VIII..to.propanoate.	Frailty	MR-PRESSO	4	0.000804365	0.0054249	0.891533								rs11732315; rs12028490; rs2127754; rs9927590
PWY.6147..6.hydroxymethyl.dihydropterin.diphosphate.biosynthesis.I	Frailty	MR Egger	7	-0.0431474	0.152117	0.788052	0.00240042	0.0135806	0.866638					rs10792007; rs11732083; rs1366290; rs1940600; rs2548882; rs2714053; rs73401412
PWY.6612..superpathway.of.tetrahydrofolate.biosynthesis	Frailty	Inverse variance weighted	8	-0.00439844	0.0153817	0.774914				11.9606	7	0.10186	0.977708	rs1027949; rs10815601; rs1573442; rs17155574; rs17824268; rs2214921; rs4833077; rs6673038
PWY.6147..6.hydroxymethyl.dihydropterin.diphosphate.biosynthesis.I	Frailty	Weighted median	7	-0.0308036	0.0220939	0.163254								rs10792007; rs11732083; rs1366290; rs1940600; rs2548882; rs2714053; rs73401412
PWY.6147..6.hydroxymethyl.dihydropterin.diphosphate.biosynthesis.I	Frailty	MR-PRESSO	7	-0.0223929	0.0178671	0.250334								rs10792007; rs11732083; rs1366290; rs1940600; rs2548882; rs2714053; rs73401412
PWY.6151..S.adenosyl.L.methionine.cycle.I	Frailty	MR Egger	8	0.0400511	0.0609976	0.535794	-0.00373894	0.00625147	0.571649					rs116996492; rs12530267; rs1751578; rs2235334; rs2827430; rs62314649; rs6879880; rs7513344
k__Bacteria.p__Actinobacteria.c__Actinobacteria.o__Bifidobacteriales.f__Bifidobacteriaceae.g__Bifidobacterium.s__Bifidobacterium_longum	Frailty	Inverse variance weighted	5	0.00473264	0.0168071	0.778261				1.98332	4	0.738826	0.977708	rs10033190; rs13391731; rs6780177; rs73412051; rs7761703
PWY.6151..S.adenosyl.L.methionine.cycle.I	Frailty	MR-PRESSO	8	0.00420535	0.014959	0.785749								rs116996492; rs12530267; rs1751578; rs2235334; rs2827430; rs62314649; rs6879880; rs7513344
PWY.6151..S.adenosyl.L.methionine.cycle.I	Frailty	Weighted median	8	-0.00230974	0.0196436	0.906399								rs116996492; rs12530267; rs1751578; rs2235334; rs2827430; rs62314649; rs6879880; rs7513344
PWY.6353..purine.nucleotides.degradation.II..aerobic.	Frailty	MR Egger	9	-0.034169	0.0767241	0.669514	0.000984789	0.00809925	0.90664					rs10801008; rs12201310; rs12336386; rs132685; rs2137304; rs2895633; rs396769; rs4551833; rs7527876
k__Bacteria.p__Actinobacteria.c__Actinobacteria.o__Bifidobacteriales.f__Bifidobacteriaceae.g__Bifidobacterium.s__Bifidobacterium_adolescentis	Frailty	Inverse variance weighted	7	0.00437063	0.0191079	0.819076				10.5083	6	0.104815	0.977708	rs11986537; rs4110696; rs4256405; rs4351047; rs4646215; rs74394156; rs8045380
PWY.6353..purine.nucleotides.degradation.II..aerobic.	Frailty	MR-PRESSO	9	-0.0250655	0.015698	0.148992								rs10801008; rs12201310; rs12336386; rs132685; rs2137304; rs2895633; rs396769; rs4551833; rs7527876
PWY.6353..purine.nucleotides.degradation.II..aerobic.	Frailty	Weighted median	9	-0.0140405	0.0192235	0.465158								rs10801008; rs12201310; rs12336386; rs132685; rs2137304; rs2895633; rs396769; rs4551833; rs7527876
PWY.6612..superpathway.of.tetrahydrofolate.biosynthesis	Frailty	MR Egger	8	-0.102722	0.0649882	0.165046	0.0121215	0.00782261	0.172226					rs1027949; rs10815601; rs1573442; rs17155574; rs17824268; rs2214921; rs4833077; rs6673038
HISTSYN.PWY..L.histidine.biosynthesis	Frailty	Inverse variance weighted	5	0.0041406	0.0189654	0.827177				2.33691	4	0.674057	0.977708	rs10005886; rs10772275; rs12098656; rs7145596; rs78778914
PWY.6612..superpathway.of.tetrahydrofolate.biosynthesis	Frailty	Weighted median	8	-0.0177105	0.0156751	0.258539								rs1027949; rs10815601; rs1573442; rs17155574; rs17824268; rs2214921; rs4833077; rs6673038
PWY.6612..superpathway.of.tetrahydrofolate.biosynthesis	Frailty	MR-PRESSO	8	-0.00439844	0.0153817	0.783191								rs1027949; rs10815601; rs1573442; rs17155574; rs17824268; rs2214921; rs4833077; rs6673038
PWY.6708..ubiquinol.8.biosynthesis..prokaryotic.	Frailty	MR Egger	6	-0.0138632	0.0352533	0.714198	0.00609369	0.00602048	0.368712					rs113976504; rs11898768; rs12550124; rs1624064; rs2636908; rs3750879
LACTOSECAT.PWY..lactose.and.galactose.degradation.I	Frailty	Inverse variance weighted	8	0.00368884	0.0210138	0.860652				17.2985	7	0.0155696	0.977708	rs118184992; rs17034687; rs191667368; rs4960590; rs507666; rs7147611; rs80205307; rs9982657
PWY.6708..ubiquinol.8.biosynthesis..prokaryotic.	Frailty	Weighted median	6	0.029379	0.0141101	0.0373309								rs113976504; rs11898768; rs12550124; rs1624064; rs2636908; rs3750879
PWY.6708..ubiquinol.8.biosynthesis..prokaryotic.	Frailty	MR-PRESSO	6	0.0201398	0.0104591	0.112125								rs113976504; rs11898768; rs12550124; rs1624064; rs2636908; rs3750879
PWY.7209..superpathway.of.pyrimidine.ribonucleosides.degradation	Frailty	MR Egger	10	-0.0379379	0.038593	0.354387	0.00191659	0.00483066	0.701922					rs10489050; rs11215429; rs11242123; rs1474383; rs261555; rs4783336; rs617079; rs6587723; rs6805759; rs836868
k__Bacteria.p__Actinobacteria.c__Actinobacteria.o__Bifidobacteriales.f__Bifidobacteriaceae	Frailty	Inverse variance weighted	5	0.0028159	0.0183435	0.877996				2.32077	4	0.67699	0.977708	rs10455532; rs12657170; rs4851317; rs4859454; rs74452406
PWY.7209..superpathway.of.pyrimidine.ribonucleosides.degradation	Frailty	MR-PRESSO	10	-0.0233433	0.0111146	0.0650942								rs10489050; rs11215429; rs11242123; rs1474383; rs261555; rs4783336; rs617079; rs6587723; rs6805759; rs836868
PWY.7209..superpathway.of.pyrimidine.ribonucleosides.degradation	Frailty	Weighted median	10	-0.0231827	0.0141688	0.101802								rs10489050; rs11215429; rs11242123; rs1474383; rs261555; rs4783336; rs617079; rs6587723; rs6805759; rs836868
PWY.7234..inosine.5..phosphate.biosynthesis.III	Frailty	MR Egger	6	0.0411201	0.127655	0.763495	-0.00637616	0.0201221	0.767188					rs112075774; rs117005933; rs1275053; rs35096174; rs79676117; rs928495
k__Bacteria.p__Actinobacteria.c__Actinobacteria.o__Bifidobacteriales	Frailty	Inverse variance weighted	5	0.0028152	0.0183438	0.878029				2.32078	4	0.676988	0.977708	rs10455532; rs12657170; rs4851317; rs4859454; rs74452406
PWY.7234..inosine.5..phosphate.biosynthesis.III	Frailty	MR-PRESSO	6	0.00101032	0.0108693	0.929552								rs112075774; rs117005933; rs1275053; rs35096174; rs79676117; rs928495
PWY.7234..inosine.5..phosphate.biosynthesis.III	Frailty	Weighted median	6	-0.000416057	0.0200409	0.983437								rs112075774; rs117005933; rs1275053; rs35096174; rs79676117; rs928495
PWY.841..superpathway.of.purine.nucleotides.de.novo.biosynthesis.I	Frailty	MR Egger	5	-0.0305954	0.133531	0.833503	0.00383127	0.0155914	0.821743					rs11588127; rs1584586; rs35698389; rs57187632; rs60748324
PWY.5088..L.glutamate.degradation.VIII..to.propanoate.	Frailty	Inverse variance weighted	4	0.000804365	0.00992622	0.935415				0.896061	3	0.826378	0.977708	rs11732315; rs12028490; rs2127754; rs9927590
PWY.841..superpathway.of.purine.nucleotides.de.novo.biosynthesis.I	Frailty	Weighted median	5	-0.0158213	0.0264361	0.549525								rs11588127; rs1584586; rs35698389; rs57187632; rs60748324
PWY.841..superpathway.of.purine.nucleotides.de.novo.biosynthesis.I	Frailty	MR-PRESSO	5	0.0015672	0.0231328	0.949237								rs11588127; rs1584586; rs35698389; rs57187632; rs60748324
PWY_REDCITCYC..TCA.cycle.VIII..helicobacter.	Frailty	MR Egger	7	0.0249254	0.0794461	0.766386	-0.00290895	0.0121956	0.820941					rs10159356; rs12035973; rs2420153; rs3923652; rs61545203; rs8057488; rs9965721
PWY.841..superpathway.of.purine.nucleotides.de.novo.biosynthesis.I	Frailty	Inverse variance weighted	5	0.0015672	0.0231328	0.945986				6.46996	4	0.166693	0.977708	rs11588127; rs1584586; rs35698389; rs57187632; rs60748324
PWY_REDCITCYC..TCA.cycle.VIII..helicobacter.	Frailty	MR-PRESSO	7	0.00641833	0.0156752	0.696421								rs10159356; rs12035973; rs2420153; rs3923652; rs61545203; rs8057488; rs9965721
PWY_REDCITCYC..TCA.cycle.VIII..helicobacter.	Frailty	Weighted median	7	0.000774861	0.0162458	0.961958								rs10159356; rs12035973; rs2420153; rs3923652; rs61545203; rs8057488; rs9965721
PYRIDNUCSYN.PWY..NAD.biosynthesis.I..from.aspartate.	Frailty	MR Egger	8	0.0705064	0.0744726	0.380321	-0.00436482	0.00870183	0.63382					rs1126742; rs12871823; rs143920868; rs148280750; rs169503; rs74459573; rs8045981; rs9811455
PWY.7234..inosine.5..phosphate.biosynthesis.III	Frailty	Inverse variance weighted	6	0.00101032	0.0165368	0.951283				2.16009	5	0.826579	0.977708	rs112075774; rs117005933; rs1275053; rs35096174; rs79676117; rs928495
PYRIDNUCSYN.PWY..NAD.biosynthesis.I..from.aspartate.	Frailty	MR-PRESSO	8	0.0343406	0.0176194	0.0923008								rs1126742; rs12871823; rs143920868; rs148280750; rs169503; rs74459573; rs8045981; rs9811455
PYRIDNUCSYN.PWY..NAD.biosynthesis.I..from.aspartate.	Frailty	Weighted median	8	0.0323716	0.0203385	0.111466								rs1126742; rs12871823; rs143920868; rs148280750; rs169503; rs74459573; rs8045981; rs9811455
TRPSYN.PWY..L.tryptophan.biosynthesis	Frailty	MR Egger	5	0.0400662	0.115704	0.751994	-0.0011172	0.011917	0.931219					rs17399145; rs1990421; rs2935713; rs55893824; rs62241211
k__Bacteria.p__Actinobacteria.c__Actinobacteria.o__Bifidobacteriales.f__Bifidobacteriaceae.g__Bifidobacterium	Frailty	Inverse variance weighted	5	-0.000474617	0.0186869	0.979737				1.79971	4	0.772536	0.979737	rs10455532; rs12657170; rs4472164; rs4859454; rs74452406
TRPSYN.PWY..L.tryptophan.biosynthesis	Frailty	MR-PRESSO	5	0.0296759	0.0288136	0.361244								rs17399145; rs1990421; rs2935713; rs55893824; rs62241211
TRPSYN.PWY..L.tryptophan.biosynthesis	Frailty	Weighted median	5	0.0237373	0.0282902	0.401433								rs17399145; rs1990421; rs2935713; rs55893824; rs62241211

## Sheet: h.MR_HS
Legend: This table lists MR results when using Health Span as outcome. For taxa and pathways tested, we show the results of IVW, WM, MR-PRESSO tests. MR-Egger was run to derive the intercept for evaluating pleiotropy, but for completeness also the causal estimate is reported. For IVW, the Cochran's Q test results are also shown. The pval_adj column reports the IVW adjusted pvalue after multiple t…
exposure	outcome	method	nsnp	beta_c	se	pval	egger_intercept.ple	se.ple	pval.ple	Q.het	Q_df.het	Q_pval.het	pval_adj	IV_list
ASPASN.PWY..superpathway.of.L.aspartate.and.L.asparagine.biosynthesis	Health_Span	Inverse variance weighted	5	-0.00174986	0.0337868	0.958695				6.43016	4	0.169244	0.958695	rs113902391; rs12490065; rs2846765; rs820496; rs9545502
ASPASN.PWY..superpathway.of.L.aspartate.and.L.asparagine.biosynthesis	Health_Span	MR Egger	5	-0.432853	0.40842	0.366998	0.0399884	0.0377584	0.367295					rs113902391; rs12490065; rs2846765; rs820496; rs9545502
ASPASN.PWY..superpathway.of.L.aspartate.and.L.asparagine.biosynthesis	Health_Span	MR-PRESSO	5	-0.00174986	0.0337868	0.961178								rs113902391; rs12490065; rs2846765; rs820496; rs9545502
ASPASN.PWY..superpathway.of.L.aspartate.and.L.asparagine.biosynthesis	Health_Span	Weighted median	5	0.0305256	0.0393424	0.437812								rs113902391; rs12490065; rs2846765; rs820496; rs9545502
ENTBACSYN.PWY..enterobactin.biosynthesis	Health_Span	MR-PRESSO	1											rs706111
ENTBACSYN.PWY..enterobactin.biosynthesis	Health_Span	Wald ratio	1	0.00772994	0.0286742	0.787485							0.958695	rs706111
GLYCOCAT.PWY..glycogen.degradation.I..bacterial.	Health_Span	Inverse variance weighted	5	-0.0196244	0.0229868	0.393259				0.448625	4	0.978306	0.958695	rs115001375; rs2056101; rs35296932; rs41474647; rs59657730
GLYCOCAT.PWY..glycogen.degradation.I..bacterial.	Health_Span	MR Egger	5	0.0022269	0.111862	0.985367	-0.00253718	0.0127112	0.854556					rs115001375; rs2056101; rs35296932; rs41474647; rs59657730
GLYCOCAT.PWY..glycogen.degradation.I..bacterial.	Health_Span	MR-PRESSO	5	-0.0196244	0.00769823	0.0633586								rs115001375; rs2056101; rs35296932; rs41474647; rs59657730
GLYCOCAT.PWY..glycogen.degradation.I..bacterial.	Health_Span	Weighted median	5	-0.0151242	0.0270531	0.576122								rs115001375; rs2056101; rs35296932; rs41474647; rs59657730
HISDEG.PWY..L.histidine.degradation.I	Health_Span	Inverse variance weighted	7	0.0115382	0.0221867	0.60303				2.43063	6	0.876149	0.958695	rs11948304; rs12137024; rs1501270; rs2175835; rs3095927; rs6783574; rs9275187
HISDEG.PWY..L.histidine.degradation.I	Health_Span	MR Egger	7	0.0493067	0.0912961	0.612322	-0.00395588	0.00927571	0.687498					rs11948304; rs12137024; rs1501270; rs2175835; rs3095927; rs6783574; rs9275187
HISDEG.PWY..L.histidine.degradation.I	Health_Span	MR-PRESSO	7	0.00715384	0.0130775	0.601351								rs11948304; rs12137024; rs1501270; rs2175835; rs3095927; rs6783574; rs9275187
HISDEG.PWY..L.histidine.degradation.I	Health_Span	Weighted median	7	0.012494	0.0281053	0.656649								rs11948304; rs12137024; rs1501270; rs2175835; rs3095927; rs6783574; rs9275187
HISTSYN.PWY..L.histidine.biosynthesis	Health_Span	Inverse variance weighted	5	-0.0210675	0.0279126	0.450389				2.79926	4	0.591961	0.958695	rs10005886; rs10772275; rs12098656; rs7145596; rs78778914
HISTSYN.PWY..L.histidine.biosynthesis	Health_Span	MR Egger	5	-0.0158707	0.075138	0.84625	-0.000699007	0.00938326	0.945306					rs10005886; rs10772275; rs12098656; rs7145596; rs78778914
HISTSYN.PWY..L.histidine.biosynthesis	Health_Span	MR-PRESSO	5	-0.0210675	0.0233503	0.417948								rs10005886; rs10772275; rs12098656; rs7145596; rs78778914
HISTSYN.PWY..L.histidine.biosynthesis	Health_Span	Weighted median	5	-0.0120283	0.0330468	0.715874								rs10005886; rs10772275; rs12098656; rs7145596; rs78778914
k__Bacteria.p__Actinobacteria	Health_Span	Inverse variance weighted	8	0.021682	0.0201667	0.282314				7.17892	7	0.410492	0.958695	rs12955365; rs182549; rs2197344; rs35344390; rs6044857; rs61939486; rs74452406; rs926010
k__Bacteria.p__Actinobacteria	Health_Span	MR Egger	8	-0.0531117	0.093057	0.588894	0.00792966	0.00962008	0.441308					rs12955365; rs182549; rs2197344; rs35344390; rs6044857; rs61939486; rs74452406; rs926010
k__Bacteria.p__Actinobacteria	Health_Span	MR-PRESSO	8	0.021682	0.0201667	0.317969								rs12955365; rs182549; rs2197344; rs35344390; rs6044857; rs61939486; rs74452406; rs926010
k__Bacteria.p__Actinobacteria	Health_Span	Weighted median	8	0.00596803	0.0256343	0.815905								rs12955365; rs182549; rs2197344; rs35344390; rs6044857; rs61939486; rs74452406; rs926010
k__Bacteria.p__Actinobacteria.c__Actinobacteria	Health_Span	Inverse variance weighted	8	0.0216807	0.0201672	0.282352				7.17908	7	0.410475	0.958695	rs12955365; rs182549; rs2197344; rs35344390; rs6044857; rs61939486; rs74452406; rs926010
k__Bacteria.p__Actinobacteria.c__Actinobacteria	Health_Span	MR Egger	8	-0.0531339	0.0930495	0.588713	0.00793182	0.00961921	0.44115					rs12955365; rs182549; rs2197344; rs35344390; rs6044857; rs61939486; rs74452406; rs926010
k__Bacteria.p__Actinobacteria.c__Actinobacteria	Health_Span	MR-PRESSO	8	0.0216807	0.0201672	0.318005								rs12955365; rs182549; rs2197344; rs35344390; rs6044857; rs61939486; rs74452406; rs926010
k__Bacteria.p__Actinobacteria.c__Actinobacteria	Health_Span	Weighted median	8	0.00596826	0.0255602	0.815375								rs12955365; rs182549; rs2197344; rs35344390; rs6044857; rs61939486; rs74452406; rs926010
k__Bacteria.p__Actinobacteria.c__Actinobacteria.o__Bifidobacteriales	Health_Span	Inverse variance weighted	6	-0.00370075	0.0218994	0.865806				2.93309	5	0.710301	0.958695	rs10455532; rs12657170; rs182549; rs4851317; rs4859454; rs74452406
k__Bacteria.p__Actinobacteria.c__Actinobacteria.o__Bifidobacteriales	Health_Span	MR Egger	6	0.0553302	0.0697302	0.471905	-0.00673376	0.00755178	0.422957					rs10455532; rs12657170; rs182549; rs4851317; rs4859454; rs74452406
k__Bacteria.p__Actinobacteria.c__Actinobacteria.o__Bifidobacteriales	Health_Span	MR-PRESSO	6	-0.00370075	0.016773	0.834101								rs10455532; rs12657170; rs182549; rs4851317; rs4859454; rs74452406
k__Bacteria.p__Actinobacteria.c__Actinobacteria.o__Bifidobacteriales	Health_Span	Weighted median	6	0.00472959	0.027729	0.864566								rs10455532; rs12657170; rs182549; rs4851317; rs4859454; rs74452406
k__Bacteria.p__Actinobacteria.c__Actinobacteria.o__Bifidobacteriales.f__Bifidobacteriaceae	Health_Span	Inverse variance weighted	6	-0.0036961	0.0218979	0.865964				2.93316	5	0.71029	0.958695	rs10455532; rs12657170; rs182549; rs4851317; rs4859454; rs74452406
k__Bacteria.p__Actinobacteria.c__Actinobacteria.o__Bifidobacteriales.f__Bifidobacteriaceae	Health_Span	MR Egger	6	0.055313	0.0696919	0.471807	-0.00673208	0.00754815	0.422858					rs10455532; rs12657170; rs182549; rs4851317; rs4859454; rs74452406
k__Bacteria.p__Actinobacteria.c__Actinobacteria.o__Bifidobacteriales.f__Bifidobacteriaceae	Health_Span	MR-PRESSO	6	-0.0036961	0.016772	0.834296								rs10455532; rs12657170; rs182549; rs4851317; rs4859454; rs74452406
k__Bacteria.p__Actinobacteria.c__Actinobacteria.o__Bifidobacteriales.f__Bifidobacteriaceae	Health_Span	Weighted median	6	0.0047306	0.0269747	0.860788								rs10455532; rs12657170; rs182549; rs4851317; rs4859454; rs74452406
k__Bacteria.p__Actinobacteria.c__Actinobacteria.o__Bifidobacteriales.f__Bifidobacteriaceae.g__Bifidobacterium	Health_Span	Inverse variance weighted	6	-0.00150396	0.0222142	0.946022				3.25544	5	0.66067	0.958695	rs10455532; rs12657170; rs182549; rs4472164; rs4859454; rs74452406
k__Bacteria.p__Actinobacteria.c__Actinobacteria.o__Bifidobacteriales.f__Bifidobacteriaceae.g__Bifidobacterium	Health_Span	MR Egger	6	0.0805975	0.0722308	0.327002	-0.00975849	0.00816918	0.298252					rs10455532; rs12657170; rs182549; rs4472164; rs4859454; rs74452406
k__Bacteria.p__Actinobacteria.c__Actinobacteria.o__Bifidobacteriales.f__Bifidobacteriaceae.g__Bifidobacterium	Health_Span	MR-PRESSO	6	-0.00150396	0.0179246	0.936388								rs10455532; rs12657170; rs182549; rs4472164; rs4859454; rs74452406
k__Bacteria.p__Actinobacteria.c__Actinobacteria.o__Bifidobacteriales.f__Bifidobacteriaceae.g__Bifidobacterium	Health_Span	Weighted median	6	0.00470935	0.0263873	0.858354								rs10455532; rs12657170; rs182549; rs4472164; rs4859454; rs74452406
k__Bacteria.p__Actinobacteria.c__Actinobacteria.o__Bifidobacteriales.f__Bifidobacteriaceae.g__Bifidobacterium.s__Bifidobacterium_adolescentis	Health_Span	Inverse variance weighted	8	0.00815602	0.0183462	0.656636				6.47142	7	0.485903	0.958695	rs11986537; rs4110696; rs4256405; rs4351047; rs4646215; rs6754311; rs74394156; rs8045380
k__Bacteria.p__Actinobacteria.c__Actinobacteria.o__Bifidobacteriales.f__Bifidobacteriaceae.g__Bifidobacterium.s__Bifidobacterium_adolescentis	Health_Span	MR Egger	8	-0.112606	0.0704232	0.16094	0.013926	0.00784064	0.12605					rs11986537; rs4110696; rs4256405; rs4351047; rs4646215; rs6754311; rs74394156; rs8045380
k__Bacteria.p__Actinobacteria.c__Actinobacteria.o__Bifidobacteriales.f__Bifidobacteriaceae.g__Bifidobacterium.s__Bifidobacterium_adolescentis	Health_Span	MR-PRESSO	8	0.00815602	0.0176399	0.65785								rs11986537; rs4110696; rs4256405; rs4351047; rs4646215; rs6754311; rs74394156; rs8045380
k__Bacteria.p__Actinobacteria.c__Actinobacteria.o__Bifidobacteriales.f__Bifidobacteriaceae.g__Bifidobacterium.s__Bifidobacterium_adolescentis	Health_Span	Weighted median	8	-0.00738868	0.0243061	0.761139								rs11986537; rs4110696; rs4256405; rs4351047; rs4646215; rs6754311; rs74394156; rs8045380
k__Bacteria.p__Actinobacteria.c__Actinobacteria.o__Bifidobacteriales.f__Bifidobacteriaceae.g__Bifidobacterium.s__Bifidobacterium_bifidum	Health_Span	Inverse variance weighted	11	0.00188902	0.0132443	0.886583				20.0829	10	0.0284784	0.958695	rs11630244; rs17453521; rs4861647; rs59340188; rs62555927; rs722497; rs7334864; rs8176645; rs849116; rs9525230; rs9848175
k__Bacteria.p__Actinobacteria.c__Actinobacteria.o__Bifidobacteriales.f__Bifidobacteriaceae.g__Bifidobacterium.s__Bifidobacterium_bifidum	Health_Span	MR Egger	11	-0.01042	0.0492954	0.8373	0.0027138	0.0104267	0.800509					rs11630244; rs17453521; rs4861647; rs59340188; rs62555927; rs722497; rs7334864; rs8176645; rs849116; rs9525230; rs9848175
k__Bacteria.p__Actinobacteria.c__Actinobacteria.o__Bifidobacteriales.f__Bifidobacteriaceae.g__Bifidobacterium.s__Bifidobacterium_bifidum	Health_Span	MR-PRESSO	10	0.00188902	0.0132443	0.889416								rs11630244; rs17453521; rs4861647; rs59340188; rs62555927; rs722497; rs7334864; rs849116; rs9525230; rs9848175
k__Bacteria.p__Actinobacteria.c__Actinobacteria.o__Bifidobacteriales.f__Bifidobacteriaceae.g__Bifidobacterium.s__Bifidobacterium_bifidum	Health_Span	Weighted median	11	-0.000867626	0.0138708	0.950125								rs11630244; rs17453521; rs4861647; rs59340188; rs62555927; rs722497; rs7334864; rs8176645; rs849116; rs9525230; rs9848175
k__Bacteria.p__Actinobacteria.c__Actinobacteria.o__Bifidobacteriales.f__Bifidobacteriaceae.g__Bifidobacterium.s__Bifidobacterium_longum	Health_Span	Inverse variance weighted	6	-0.0054217	0.0413424	0.895663				17.3822	5	0.00382919	0.958695	rs10033190; rs13391731; rs1446585; rs6780177; rs73412051; rs7761703
k__Bacteria.p__Actinobacteria.c__Actinobacteria.o__Bifidobacteriales.f__Bifidobacteriaceae.g__Bifidobacterium.s__Bifidobacterium_longum	Health_Span	MR Egger	6	-0.0238555	0.217494	0.917943	0.00222218	0.0256209	0.935052					rs10033190; rs13391731; rs1446585; rs6780177; rs73412051; rs7761703
k__Bacteria.p__Actinobacteria.c__Actinobacteria.o__Bifidobacteriales.f__Bifidobacteriaceae.g__Bifidobacterium.s__Bifidobacterium_longum	Health_Span	MR-PRESSO	4	-0.0054217	0.0413424	0.900777								rs10033190; rs13391731; rs1446585; rs6780177
k__Bacteria.p__Actinobacteria.c__Actinobacteria.o__Bifidobacteriales.f__Bifidobacteriaceae.g__Bifidobacterium.s__Bifidobacterium_longum	Health_Span	Weighted median	6	0.00297564	0.0343897	0.931047								rs10033190; rs13391731; rs1446585; rs6780177; rs73412051; rs7761703
k__Bacteria.p__Actinobacteria.c__Actinobacteria.o__Coriobacteriales	Health_Span	Inverse variance weighted	6	0.0431698	0.0499373	0.387325				20.1329	5	0.00117997	0.958695	rs11652058; rs28806584; rs2907732; rs4234207; rs550057; rs78362376
k__Bacteria.p__Actinobacteria.c__Actinobacteria.o__Coriobacteriales	Health_Span	MR Egger	6	0.337191	0.320137	0.351636	-0.0289971	0.0311756	0.404958					rs11652058; rs28806584; rs2907732; rs4234207; rs550057; rs78362376
k__Bacteria.p__Actinobacteria.c__Actinobacteria.o__Coriobacteriales	Health_Span	MR-PRESSO	5	0.0431698	0.0499373	0.426843								rs11652058; rs28806584; rs2907732; rs4234207; rs78362376
k__Bacteria.p__Actinobacteria.c__Actinobacteria.o__Coriobacteriales	Health_Span	Weighted median	6	0.00457025	0.0368957	0.901419								rs11652058; rs28806584; rs2907732; rs4234207; rs550057; rs78362376
k__Bacteria.p__Actinobacteria.c__Actinobacteria.o__Coriobacteriales.f__Coriobacteriaceae	Health_Span	Inverse variance weighted	6	0.0431803	0.0499378	0.387214				20.1317	5	0.00118059	0.958695	rs11652058; rs28806584; rs2907732; rs4234207; rs550057; rs78362376
k__Bacteria.p__Actinobacteria.c__Actinobacteria.o__Coriobacteriales.f__Coriobacteriaceae	Health_Span	MR Egger	6	0.337137	0.319901	0.351388	-0.0289901	0.0311512	0.404728					rs11652058; rs28806584; rs2907732; rs4234207; rs550057; rs78362376
k__Bacteria.p__Actinobacteria.c__Actinobacteria.o__Coriobacteriales.f__Coriobacteriaceae	Health_Span	MR-PRESSO	5	0.0431803	0.0499378	0.426742								rs11652058; rs28806584; rs2907732; rs4234207; rs78362376
k__Bacteria.p__Actinobacteria.c__Actinobacteria.o__Coriobacteriales.f__Coriobacteriaceae	Health_Span	Weighted median	6	0.00461772	0.0383486	0.904155								rs11652058; rs28806584; rs2907732; rs4234207; rs550057; rs78362376
k__Bacteria.p__Actinobacteria.c__Actinobacteria.o__Coriobacteriales.f__Coriobacteriaceae.g__Collinsella	Health_Span	Inverse variance weighted	4	0.00935922	0.0751794	0.900926				22.048	3	6.37469e-05	0.958695	rs11782083; rs550057; rs6099022; rs7831606
k__Bacteria.p__Actinobacteria.c__Actinobacteria.o__Coriobacteriales.f__Coriobacteriaceae.g__Collinsella	Health_Span	MR Egger	4	1.02628	0.66602	0.263252	-0.111976	0.0730145	0.264855					rs11782083; rs550057; rs6099022; rs7831606
k__Bacteria.p__Actinobacteria.c__Actinobacteria.o__Coriobacteriales.f__Coriobacteriaceae.g__Collinsella	Health_Span	MR-PRESSO	2	0.00935922	0.0751794	0.908799								rs11782083; rs6099022
k__Bacteria.p__Actinobacteria.c__Actinobacteria.o__Coriobacteriales.f__Coriobacteriaceae.g__Collinsella	Health_Span	Weighted median	4	-0.018604	0.049741	0.708391								rs11782083; rs550057; rs6099022; rs7831606
k__Bacteria.p__Actinobacteria.c__Actinobacteria.o__Coriobacteriales.f__Coriobacteriaceae.g__Collinsella.s__Collinsella_aerofaciens	Health_Span	Inverse variance weighted	3	0.037828	0.0836676	0.651181				13.6077	2	0.0011095	0.958695	rs386274; rs550057; rs72845940
k__Bacteria.p__Actinobacteria.c__Actinobacteria.o__Coriobacteriales.f__Coriobacteriaceae.g__Collinsella.s__Collinsella_aerofaciens	Health_Span	MR Egger	3	-0.36338	1.25951	0.821185	0.0440794	0.137823	0.802938					rs386274; rs550057; rs72845940
k__Bacteria.p__Actinobacteria.c__Actinobacteria.o__Coriobacteriales.f__Coriobacteriaceae.g__Collinsella.s__Collinsella_aerofaciens	Health_Span	MR-PRESSO	3											rs386274; rs550057; rs72845940
k__Bacteria.p__Actinobacteria.c__Actinobacteria.o__Coriobacteriales.f__Coriobacteriaceae.g__Collinsella.s__Collinsella_aerofaciens	Health_Span	Weighted median	3	-0.0233873	0.0521027	0.653526								rs386274; rs550057; rs72845940
k__Bacteria.p__Bacteroidetes.c__Bacteroidia.o__Bacteroidales.f__Rikenellaceae	Health_Span	Inverse variance weighted	3	-0.00619448	0.0360413	0.863538				1.44425	2	0.48572	0.958695	rs11211406; rs2465506; rs73344869
k__Bacteria.p__Bacteroidetes.c__Bacteroidia.o__Bacteroidales.f__Rikenellaceae	Health_Span	MR Egger	3	0.0589434	0.146712	0.756795	-0.0084637	0.018365	0.725077					rs11211406; rs2465506; rs73344869
k__Bacteria.p__Bacteroidetes.c__Bacteroidia.o__Bacteroidales.f__Rikenellaceae	Health_Span	MR-PRESSO	3											rs11211406; rs2465506; rs73344869
k__Bacteria.p__Bacteroidetes.c__Bacteroidia.o__Bacteroidales.f__Rikenellaceae	Health_Span	Weighted median	3	-0.0259289	0.0444076	0.559299								rs11211406; rs2465506; rs73344869
k__Bacteria.p__Bacteroidetes.c__Bacteroidia.o__Bacteroidales.f__Rikenellaceae.g__Alistipes	Health_Span	Inverse variance weighted	3	-0.00610205	0.0359389	0.865176				1.44496	2	0.485547	0.958695	rs11211406; rs2465506; rs73344869
k__Bacteria.p__Bacteroidetes.c__Bacteroidia.o__Bacteroidales.f__Rikenellaceae.g__Alistipes	Health_Span	MR Egger	3	0.0602823	0.146286	0.751158	-0.00864786	0.0183639	0.719817					rs11211406; rs2465506; rs73344869
k__Bacteria.p__Bacteroidetes.c__Bacteroidia.o__Bacteroidales.f__Rikenellaceae.g__Alistipes	Health_Span	MR-PRESSO	3											rs11211406; rs2465506; rs73344869
k__Bacteria.p__Bacteroidetes.c__Bacteroidia.o__Bacteroidales.f__Rikenellaceae.g__Alistipes	Health_Span	Weighted median	3	-0.0257749	0.0446291	0.563577								rs11211406; rs2465506; rs73344869
k__Bacteria.p__Bacteroidetes.c__Bacteroidia.o__Bacteroidales.f__Rikenellaceae.g__Alistipes.s__Alistipes_sp_AP11	Health_Span	Inverse variance weighted	4	-0.0181465	0.0182864	0.321027				1.10168	3	0.776668	0.958695	rs12022867; rs13333427; rs1553042; rs28450200
k__Bacteria.p__Bacteroidetes.c__Bacteroidia.o__Bacteroidales.f__Rikenellaceae.g__Alistipes.s__Alistipes_sp_AP11	Health_Span	MR Egger	4	0.018295	0.0800742	0.840512	-0.00696198	0.0148936	0.686163					rs12022867; rs13333427; rs1553042; rs28450200
k__Bacteria.p__Bacteroidetes.c__Bacteroidia.o__Bacteroidales.f__Rikenellaceae.g__Alistipes.s__Alistipes_sp_AP11	Health_Span	MR-PRESSO	4	-0.0181465	0.0110814	0.200038								rs12022867; rs13333427; rs1553042; rs28450200
k__Bacteria.p__Bacteroidetes.c__Bacteroidia.o__Bacteroidales.f__Rikenellaceae.g__Alistipes.s__Alistipes_sp_AP11	Health_Span	Weighted median	4	-0.0176981	0.0220835	0.42289								rs12022867; rs13333427; rs1553042; rs28450200
k__Bacteria.p__Firmicutes.c__Negativicutes	Health_Span	Inverse variance weighted	5	-0.0371686	0.0443808	0.402316				12.0436	4	0.0170296	0.958695	rs12472147; rs12979658; rs2282037; rs77764206; rs78791321
k__Bacteria.p__Firmicutes.c__Negativicutes	Health_Span	MR Egger	5	-0.0988188	0.216092	0.67854	0.00750639	0.0255815	0.788321					rs12472147; rs12979658; rs2282037; rs77764206; rs78791321
k__Bacteria.p__Firmicutes.c__Negativicutes	Health_Span	MR-PRESSO	4	-0.0371686	0.0443808	0.449438								rs12472147; rs12979658; rs77764206; rs78791321
k__Bacteria.p__Firmicutes.c__Negativicutes	Health_Span	Weighted median	5	-0.0637158	0.0392968	0.104932								rs12472147; rs12979658; rs2282037; rs77764206; rs78791321
k__Bacteria.p__Firmicutes.c__Negativicutes.o__Selenomonadales	Health_Span	Inverse variance weighted	5	-0.0371703	0.0443817	0.402305				12.0436	4	0.0170302	0.958695	rs12472147; rs12979658; rs2282037; rs77764206; rs78791321
k__Bacteria.p__Firmicutes.c__Negativicutes.o__Selenomonadales	Health_Span	MR Egger	5	-0.0988368	0.216098	0.678494	0.00750817	0.0255815	0.788273					rs12472147; rs12979658; rs2282037; rs77764206; rs78791321
k__Bacteria.p__Firmicutes.c__Negativicutes.o__Selenomonadales	Health_Span	MR-PRESSO	4	-0.0371703	0.0443817	0.449428								rs12472147; rs12979658; rs77764206; rs78791321
k__Bacteria.p__Firmicutes.c__Negativicutes.o__Selenomonadales	Health_Span	Weighted median	5	-0.0637199	0.0376961	0.0909594								rs12472147; rs12979658; rs2282037; rs77764206; rs78791321
k__Bacteria.p__Proteobacteria.c__Gammaproteobacteria.o__Enterobacteriales.f__Enterobacteriaceae.g__Escherichia.s__Escherichia_unclassified	Health_Span	Inverse variance weighted	5	-0.0133254	0.0247458	0.590238				5.39393	4	0.249212	0.958695	rs10900435; rs115534005; rs12300342; rs12700345; rs2791437
k__Bacteria.p__Proteobacteria.c__Gammaproteobacteria.o__Enterobacteriales.f__Enterobacteriaceae.g__Escherichia.s__Escherichia_unclassified	Health_Span	MR Egger	5	0.0374397	0.0992446	0.731096	-0.00654774	0.0123063	0.631565					rs10900435; rs115534005; rs12300342; rs12700345; rs2791437
k__Bacteria.p__Proteobacteria.c__Gammaproteobacteria.o__Enterobacteriales.f__Enterobacteriaceae.g__Escherichia.s__Escherichia_unclassified	Health_Span	MR-PRESSO	5	-0.0133254	0.0247458	0.618806								rs10900435; rs115534005; rs12300342; rs12700345; rs2791437
k__Bacteria.p__Proteobacteria.c__Gammaproteobacteria.o__Enterobacteriales.f__Enterobacteriaceae.g__Escherichia.s__Escherichia_unclassified	Health_Span	Weighted median	5	-0.027979	0.0285147	0.326487								rs10900435; rs115534005; rs12300342; rs12700345; rs2791437
LACTOSECAT.PWY..lactose.and.galactose.degradation.I	Health_Span	Inverse variance weighted	8	0.0552857	0.0337593	0.101496				20.5099	7	0.00456753	0.958695	rs118184992; rs17034687; rs191667368; rs4960590; rs507666; rs7147611; rs80205307; rs9982657
LACTOSECAT.PWY..lactose.and.galactose.degradation.I	Health_Span	MR Egger	8	-0.00818913	0.124427	0.949663	0.00949824	0.0178392	0.613555					rs118184992; rs17034687; rs191667368; rs4960590; rs507666; rs7147611; rs80205307; rs9982657
LACTOSECAT.PWY..lactose.and.galactose.degradation.I	Health_Span	MR-PRESSO	7	0.0573617	0.0302392	0.094413								rs17034687; rs191667368; rs4960590; rs507666; rs7147611; rs80205307; rs9982657
LACTOSECAT.PWY..lactose.and.galactose.degradation.I	Health_Span	Weighted median	8	0.099111	0.0316268	0.00172581								rs118184992; rs17034687; rs191667368; rs4960590; rs507666; rs7147611; rs80205307; rs9982657
P105.PWY..TCA.cycle.IV..2.oxoglutarate.decarboxylase.	Health_Span	Inverse variance weighted	2	0.0178739	0.0263026	0.49679				0.958233	1	0.327632	0.958695	rs36182340; rs72814612
P105.PWY..TCA.cycle.IV..2.oxoglutarate.decarboxylase.	Health_Span	MR-PRESSO	2											rs36182340; rs72814612
PWY.5088..L.glutamate.degradation.VIII..to.propanoate.	Health_Span	Inverse variance weighted	4	-0.0064813	0.014581	0.65668				2.93133	3	0.402334	0.958695	rs11732315; rs12028490; rs2127754; rs9927590
PWY.5088..L.glutamate.degradation.VIII..to.propanoate.	Health_Span	MR Egger	4	0.0612422	0.0453148	0.309109	-0.0177718	0.011259	0.255206					rs11732315; rs12028490; rs2127754; rs9927590
PWY.5088..L.glutamate.degradation.VIII..to.propanoate.	Health_Span	MR-PRESSO	4	-0.0064813	0.0144132	0.683446								rs11732315; rs12028490; rs2127754; rs9927590
PWY.5088..L.glutamate.degradation.VIII..to.propanoate.	Health_Span	Weighted median	4	-0.00346157	0.0176857	0.844824								rs11732315; rs12028490; rs2127754; rs9927590
PWY.6147..6.hydroxymethyl.dihydropterin.diphosphate.biosynthesis.I	Health_Span	Inverse variance weighted	7	0.0105633	0.0267971	0.693438				8.30773	6	0.216414	0.958695	rs10792007; rs11732083; rs1366290; rs1940600; rs2548882; rs2714053; rs73401412
PWY.6147..6.hydroxymethyl.dihydropterin.diphosphate.biosynthesis.I	Health_Span	MR Egger	7	0.272068	0.178817	0.188623	-0.02361	0.0159923	0.199884					rs10792007; rs11732083; rs1366290; rs1940600; rs2548882; rs2714053; rs73401412
PWY.6147..6.hydroxymethyl.dihydropterin.diphosphate.biosynthesis.I	Health_Span	MR-PRESSO	7	-0.00609832	0.0298526	0.843946								rs10792007; rs11732083; rs1366290; rs1940600; rs2548882; rs2714053; rs73401412
PWY.6147..6.hydroxymethyl.dihydropterin.diphosphate.biosynthesis.I	Health_Span	Weighted median	7	-0.0214398	0.032907	0.514706								rs10792007; rs11732083; rs1366290; rs1940600; rs2548882; rs2714053; rs73401412
PWY.6151..S.adenosyl.L.methionine.cycle.I	Health_Span	Inverse variance weighted	8	0.0177385	0.0214447	0.40814				6.91589	7	0.43769	0.958695	rs116996492; rs12530267; rs1751578; rs2235334; rs2827430; rs62314649; rs6879880; rs7513344
PWY.6151..S.adenosyl.L.methionine.cycle.I	Health_Span	MR Egger	8	-0.00338287	0.0791493	0.967295	0.00225814	0.00810093	0.789794					rs116996492; rs12530267; rs1751578; rs2235334; rs2827430; rs62314649; rs6879880; rs7513344
PWY.6151..S.adenosyl.L.methionine.cycle.I	Health_Span	MR-PRESSO	8	0.0145609	0.0192008	0.469992								rs116996492; rs12530267; rs1751578; rs2235334; rs2827430; rs62314649; rs6879880; rs7513344
PWY.6151..S.adenosyl.L.methionine.cycle.I	Health_Span	Weighted median	8	0.011136	0.0292831	0.703731								rs116996492; rs12530267; rs1751578; rs2235334; rs2827430; rs62314649; rs6879880; rs7513344
PWY.6353..purine.nucleotides.degradation.II..aerobic.	Health_Span	Inverse variance weighted	9	-0.0197372	0.0234662	0.400297				10.7473	8	0.216435	0.958695	rs10801008; rs12201310; rs12336386; rs132685; rs2137304; rs2895633; rs396769; rs4551833; rs7527876
PWY.6353..purine.nucleotides.degradation.II..aerobic.	Health_Span	MR Egger	9	-0.047692	0.114312	0.689022	0.00302233	0.0120602	0.809317					rs10801008; rs12201310; rs12336386; rs132685; rs2137304; rs2895633; rs396769; rs4551833; rs7527876
PWY.6353..purine.nucleotides.degradation.II..aerobic.	Health_Span	MR-PRESSO	9	-0.0197372	0.0234662	0.424722								rs10801008; rs12201310; rs12336386; rs132685; rs2137304; rs2895633; rs396769; rs4551833; rs7527876
PWY.6353..purine.nucleotides.degradation.II..aerobic.	Health_Span	Weighted median	9	-0.0188067	0.0285016	0.509353								rs10801008; rs12201310; rs12336386; rs132685; rs2137304; rs2895633; rs396769; rs4551833; rs7527876
PWY.6612..superpathway.of.tetrahydrofolate.biosynthesis	Health_Span	Inverse variance weighted	9	0.00862822	0.0200592	0.667096				12.0832	8	0.147531	0.958695	rs1027949; rs10815601; rs1573442; rs17155574; rs17824268; rs2214921; rs35989200; rs4833077; rs6673038
PWY.6612..superpathway.of.tetrahydrofolate.biosynthesis	Health_Span	MR Egger	9	-0.0771729	0.0991782	0.461982	0.0105432	0.011928	0.40608					rs1027949; rs10815601; rs1573442; rs17155574; rs17824268; rs2214921; rs35989200; rs4833077; rs6673038
PWY.6612..superpathway.of.tetrahydrofolate.biosynthesis	Health_Span	MR-PRESSO	9	0.00862822	0.0200592	0.678448								rs1027949; rs10815601; rs1573442; rs17155574; rs17824268; rs2214921; rs35989200; rs4833077; rs6673038
PWY.6612..superpathway.of.tetrahydrofolate.biosynthesis	Health_Span	Weighted median	9	0.000806208	0.0236974	0.97286								rs1027949; rs10815601; rs1573442; rs17155574; rs17824268; rs2214921; rs35989200; rs4833077; rs6673038
PWY.6708..ubiquinol.8.biosynthesis..prokaryotic.	Health_Span	Inverse variance weighted	6	0.0235971	0.0200886	0.240136				8.25944	5	0.142505	0.958695	rs113976504; rs11898768; rs12550124; rs1624064; rs2636908; rs3750879
PWY.6708..ubiquinol.8.biosynthesis..prokaryotic.	Health_Span	MR Egger	6	-0.00570681	0.0724821	0.941026	0.00525781	0.0123931	0.693205					rs113976504; rs11898768; rs12550124; rs1624064; rs2636908; rs3750879
PWY.6708..ubiquinol.8.biosynthesis..prokaryotic.	Health_Span	MR-PRESSO	6	0.0235971	0.0200886	0.293027								rs113976504; rs11898768; rs12550124; rs1624064; rs2636908; rs3750879
PWY.6708..ubiquinol.8.biosynthesis..prokaryotic.	Health_Span	Weighted median	6	0.0381027	0.0217847	0.0802813								rs113976504; rs11898768; rs12550124; rs1624064; rs2636908; rs3750879
PWY.7209..superpathway.of.pyrimidine.ribonucleosides.degradation	Health_Span	Inverse variance weighted	10	0.00586621	0.0274792	0.830954				26.466	9	0.00171323	0.958695	rs10489050; rs11215429; rs11242123; rs1474383; rs261555; rs4783336; rs617079; rs6587723; rs6805759; rs836868
PWY.7209..superpathway.of.pyrimidine.ribonucleosides.degradation	Health_Span	MR Egger	10	0.114321	0.0874731	0.227552	-0.0142316	0.0109398	0.22951					rs10489050; rs11215429; rs11242123; rs1474383; rs261555; rs4783336; rs617079; rs6587723; rs6805759; rs836868
PWY.7209..superpathway.of.pyrimidine.ribonucleosides.degradation	Health_Span	MR-PRESSO	9	0.00586621	0.0274792	0.835711								rs10489050; rs11215429; rs11242123; rs1474383; rs261555; rs4783336; rs617079; rs6805759; rs836868
PWY.7209..superpathway.of.pyrimidine.ribonucleosides.degradation	Health_Span	Weighted median	10	0.0131784	0.0230918	0.568205								rs10489050; rs11215429; rs11242123; rs1474383; rs261555; rs4783336; rs617079; rs6587723; rs6805759; rs836868
PWY.7234..inosine.5..phosphate.biosynthesis.III	Health_Span	Inverse variance weighted	6	-0.0409942	0.0428915	0.339191				15.7165	5	0.00770182	0.958695	rs112075774; rs117005933; rs1275053; rs35096174; rs79676117; rs928495
PWY.7234..inosine.5..phosphate.biosynthesis.III	Health_Span	MR Egger	6	0.0279162	0.368223	0.943208	-0.0109597	0.058069	0.859489					rs112075774; rs117005933; rs1275053; rs35096174; rs79676117; rs928495
PWY.7234..inosine.5..phosphate.biosynthesis.III	Health_Span	MR-PRESSO	5	-0.0409942	0.0428915	0.383084								rs112075774; rs117005933; rs1275053; rs35096174; rs79676117
PWY.7234..inosine.5..phosphate.biosynthesis.III	Health_Span	Weighted median	6	-0.0132675	0.0345866	0.701272								rs112075774; rs117005933; rs1275053; rs35096174; rs79676117; rs928495
PWY.841..superpathway.of.purine.nucleotides.de.novo.biosynthesis.I	Health_Span	Inverse variance weighted	5	-0.00727717	0.0265594	0.784087				3.26994	4	0.513708	0.958695	rs11588127; rs1584586; rs35698389; rs57187632; rs60748324
PWY.841..superpathway.of.purine.nucleotides.de.novo.biosynthesis.I	Health_Span	MR Egger	5	-0.042675	0.137998	0.77737	0.00421862	0.0161184	0.810472					rs11588127; rs1584586; rs35698389; rs57187632; rs60748324
PWY.841..superpathway.of.purine.nucleotides.de.novo.biosynthesis.I	Health_Span	MR-PRESSO	5	-0.00727717	0.0240136	0.776964								rs11588127; rs1584586; rs35698389; rs57187632; rs60748324
PWY.841..superpathway.of.purine.nucleotides.de.novo.biosynthesis.I	Health_Span	Weighted median	5	-0.0268276	0.0331571	0.418454								rs11588127; rs1584586; rs35698389; rs57187632; rs60748324
PWY_REDCITCYC..TCA.cycle.VIII..helicobacter.	Health_Span	Inverse variance weighted	7	0.00549813	0.0170044	0.746441				6.1257	6	0.409257	0.958695	rs10159356; rs12035973; rs2420153; rs3923652; rs61545203; rs8057488; rs9965721
PWY_REDCITCYC..TCA.cycle.VIII..helicobacter.	Health_Span	MR Egger	7	-0.0199679	0.0858673	0.825335	0.00400394	0.0131851	0.773608					rs10159356; rs12035973; rs2420153; rs3923652; rs61545203; rs8057488; rs9965721
PWY_REDCITCYC..TCA.cycle.VIII..helicobacter.	Health_Span	MR-PRESSO	7	0.00549813	0.0170044	0.757413								rs10159356; rs12035973; rs2420153; rs3923652; rs61545203; rs8057488; rs9965721
PWY_REDCITCYC..TCA.cycle.VIII..helicobacter.	Health_Span	Weighted median	7	-0.0088234	0.023626	0.708805								rs10159356; rs12035973; rs2420153; rs3923652; rs61545203; rs8057488; rs9965721
PYRIDNUCSYN.PWY..NAD.biosynthesis.I..from.aspartate.	Health_Span	Inverse variance weighted	8	0.00167308	0.0218907	0.939078				7.2223	7	0.406107	0.958695	rs1126742; rs12871823; rs143920868; rs148280750; rs169503; rs74459573; rs8045981; rs9811455
PYRIDNUCSYN.PWY..NAD.biosynthesis.I..from.aspartate.	Health_Span	MR Egger	8	-0.0808052	0.0880237	0.394027	0.00996193	0.0102946	0.370573					rs1126742; rs12871823; rs143920868; rs148280750; rs169503; rs74459573; rs8045981; rs9811455
PYRIDNUCSYN.PWY..NAD.biosynthesis.I..from.aspartate.	Health_Span	MR-PRESSO	8	0.00167308	0.0218907	0.941217								rs1126742; rs12871823; rs143920868; rs148280750; rs169503; rs74459573; rs8045981; rs9811455
PYRIDNUCSYN.PWY..NAD.biosynthesis.I..from.aspartate.	Health_Span	Weighted median	8	0.00270821	0.0295943	0.927086								rs1126742; rs12871823; rs143920868; rs148280750; rs169503; rs74459573; rs8045981; rs9811455
TRPSYN.PWY..L.tryptophan.biosynthesis	Health_Span	Inverse variance weighted	5	0.00969325	0.0302929	0.74898				4.68461	4	0.321215	0.958695	rs17399145; rs1990421; rs2935713; rs55893824; rs62241211
TRPSYN.PWY..L.tryptophan.biosynthesis	Health_Span	MR Egger	5	0.174171	0.0976524	0.172496	-0.0177096	0.0100732	0.176974					rs17399145; rs1990421; rs2935713; rs55893824; rs62241211
TRPSYN.PWY..L.tryptophan.biosynthesis	Health_Span	MR-PRESSO	5	0.00969325	0.0302929	0.764997								rs17399145; rs1990421; rs2935713; rs55893824; rs62241211
TRPSYN.PWY..L.tryptophan.biosynthesis	Health_Span	Weighted median	5	0.0282775	0.0397706	0.477075								rs17399145; rs1990421; rs2935713; rs55893824; rs62241211

## Sheet: i.MR_IP
Legend: This table lists MR results when using 1472 circulating inflammatory and cardiometabolic proteins as outcome. For taxa and pathways tested, we show the results of IVW, WM, MR-PRESSO tests. MR-Egger was run to derive the intercept for evaluating pleiotropy, but for completeness also the causal estimate is reported. For IVW, the Cochran's Q test results are also shown. The pval_adj column r…
exposure	exposure_names	outcome	Name	UniProt	Assay	Panel	method	nsnp	b	se	pval	egger_intercept.ple	se.ple	pval.ple	Q.het	Q_df.het	Q_pval.het	IV_list	exp_var	fdr	Significant
GCST90027481	HISDEG.PWY..L.histidine.degradation.I	OID20345	Vasorin	Q6EMK4	VASN	Cardiometabolic	Inverse variance weighted	7	0.107556	0.0333173	0.00124557				6.23833	6	0.397028	rs11948304; rs12137024; rs1501270; rs2175835; rs3095927; rs6783574; rs9275187		0.0460859837705036	YES
GCST90027481	HISDEG.PWY..L.histidine.degradation.I	OID20345	Vasorin	Q6EMK4	VASN	Cardiometabolic	MR Egger	7	-0.0951784	0.134908	0.511999	0.0211987	0.0136865	0.182096	3.83933	5	0.572773	rs11948304; rs12137024; rs1501270; rs2175835; rs3095927; rs6783574; rs9275187		NA	YES
GCST90027481	HISDEG.PWY..L.histidine.degradation.I	OID20345	Vasorin	Q6EMK4	VASN	Cardiometabolic	Weighted median	7	0.102647	0.0445799	0.0213046							rs11948304; rs12137024; rs1501270; rs2175835; rs3095927; rs6783574; rs9275187		NA	YES
GCST90027481	HISDEG.PWY..L.histidine.degradation.I	OID20345	Vasorin	Q6EMK4	VASN	Cardiometabolic	MR-PRESSO	7	0.107556	0.0333173	0.0179503							rs11948304; rs12137024; rs1501270; rs2175835; rs3095927; rs6783574; rs9275187		NA	YES
GCST90027481	HISDEG.PWY..L.histidine.degradation.I	OID20708	Lymphocyte antigen 6D	Q14210	LY6D	Inflammation	Inverse variance weighted	7	0.116781	0.0323951	0.000312275				5.13677	6	0.526395	rs11948304; rs12137024; rs1501270; rs2175835; rs3095927; rs6783574; rs9275187		0.011554167439229	YES
GCST90027481	HISDEG.PWY..L.histidine.degradation.I	OID20708	Lymphocyte antigen 6D	Q14210	LY6D	Inflammation	MR Egger	7	0.220871	0.134379	0.16117	-0.0108446	0.0135873	0.460996	4.49973	5	0.479919	rs11948304; rs12137024; rs1501270; rs2175835; rs3095927; rs6783574; rs9275187		NA	YES
GCST90027481	HISDEG.PWY..L.histidine.degradation.I	OID20708	Lymphocyte antigen 6D	Q14210	LY6D	Inflammation	Weighted median	7	0.111049	0.0451335	0.0138762							rs11948304; rs12137024; rs1501270; rs2175835; rs3095927; rs6783574; rs9275187		NA	YES
GCST90027481	HISDEG.PWY..L.histidine.degradation.I	OID20708	Lymphocyte antigen 6D	Q14210	LY6D	Inflammation	MR-PRESSO	7	0.116781	0.0299743	0.00802054							rs11948304; rs12137024; rs1501270; rs2175835; rs3095927; rs6783574; rs9275187		NA	YES
GCST90027482	HISTSYN.PWY..L.histidine.biosynthesis	OID20254	Latent-transforming growth factor beta-binding protein 2	Q14767	LTBP2	Cardiometabolic	Inverse variance weighted	5	0.122367	0.0360866	0.000696551				0.559383	4	0.967468	rs10005886; rs10772275; rs12098656; rs7145596; rs78778914		0.0257723785920514	YES
GCST90027482	HISTSYN.PWY..L.histidine.biosynthesis	OID20254	Latent-transforming growth factor beta-binding protein 2	Q14767	LTBP2	Cardiometabolic	MR Egger	5	0.144218	0.097158	0.23437	-0.00294454	0.0121562	0.82422	0.500709	3	0.918736	rs10005886; rs10772275; rs12098656; rs7145596; rs78778914		NA	YES
GCST90027482	HISTSYN.PWY..L.histidine.biosynthesis	OID20254	Latent-transforming growth factor beta-binding protein 2	Q14767	LTBP2	Cardiometabolic	Weighted median	5	0.127801	0.0456999	0.00516544							rs10005886; rs10772275; rs12098656; rs7145596; rs78778914		NA	YES
GCST90027482	HISTSYN.PWY..L.histidine.biosynthesis	OID20254	Latent-transforming growth factor beta-binding protein 2	Q14767	LTBP2	Cardiometabolic	MR-PRESSO	5	0.122367	0.0134949	0.000819888							rs10005886; rs10772275; rs12098656; rs7145596; rs78778914		NA	YES
GCST90027482	HISTSYN.PWY..L.histidine.biosynthesis	OID20576	Interleukin-4 receptor subunit alpha	P24394	IL4R	Inflammation	Inverse variance weighted	5	0.140029	0.0414945	0.000739125				2.62987	4	0.621541	rs10005886; rs10772275; rs12098656; rs7145596; rs78778914		0.0273476068089511	YES
GCST90027482	HISTSYN.PWY..L.histidine.biosynthesis	OID20576	Interleukin-4 receptor subunit alpha	P24394	IL4R	Inflammation	MR Egger	5	0.157156	0.11156	0.253675	-0.00230696	0.0139486	0.879153	2.60251	3	0.457049	rs10005886; rs10772275; rs12098656; rs7145596; rs78778914		NA	YES
GCST90027482	HISTSYN.PWY..L.histidine.biosynthesis	OID20576	Interleukin-4 receptor subunit alpha	P24394	IL4R	Inflammation	Weighted median	5	0.120711	0.0530603	0.0229068							rs10005886; rs10772275; rs12098656; rs7145596; rs78778914		NA	YES
GCST90027482	HISTSYN.PWY..L.histidine.biosynthesis	OID20576	Interleukin-4 receptor subunit alpha	P24394	IL4R	Inflammation	MR-PRESSO	5	0.140029	0.0336455	0.0141236							rs10005886; rs10772275; rs12098656; rs7145596; rs78778914		NA	YES
GCST90027482	HISTSYN.PWY..L.histidine.biosynthesis	OID20680	CD276 antigen	Q5ZPR3	CD276	Inflammation	Inverse variance weighted	5	0.115952	0.0353332	0.00103191				0.198386	4	0.995394	rs10005886; rs10772275; rs12098656; rs7145596; rs78778914		0.0381805706799857	YES
GCST90027482	HISTSYN.PWY..L.histidine.biosynthesis	OID20680	CD276 antigen	Q5ZPR3	CD276	Inflammation	MR Egger	5	0.109666	0.0950582	0.332203	0.00084631	0.011881	0.947696	0.193312	3	0.978662	rs10005886; rs10772275; rs12098656; rs7145596; rs78778914		NA	YES
GCST90027482	HISTSYN.PWY..L.histidine.biosynthesis	OID20680	CD276 antigen	Q5ZPR3	CD276	Inflammation	Weighted median	5	0.111535	0.0435838	0.0104947							rs10005886; rs10772275; rs12098656; rs7145596; rs78778914		NA	YES
GCST90027482	HISTSYN.PWY..L.histidine.biosynthesis	OID20680	CD276 antigen	Q5ZPR3	CD276	Inflammation	MR-PRESSO	5	0.115952	0.0078688	0.000123439							rs10005886; rs10772275; rs12098656; rs7145596; rs78778914		NA	YES
GCST90027482	HISTSYN.PWY..L.histidine.biosynthesis	OID30155	FERM domain-containing protein 4B	Q9Y2L6	FRMD4B	Cardiometabolic_II	Inverse variance weighted	5	-0.141069	0.0432357	0.00110323				3.41259	4	0.491294	rs10005886; rs10772275; rs12098656; rs7145596; rs78778914		0.0408196427527788	YES
GCST90027482	HISTSYN.PWY..L.histidine.biosynthesis	OID30155	FERM domain-containing protein 4B	Q9Y2L6	FRMD4B	Cardiometabolic_II	MR Egger	5	-0.0414021	0.116291	0.745389	-0.0134198	0.0145358	0.423982	2.56024	3	0.464502	rs10005886; rs10772275; rs12098656; rs7145596; rs78778914		NA	YES
GCST90027482	HISTSYN.PWY..L.histidine.biosynthesis	OID30155	FERM domain-containing protein 4B	Q9Y2L6	FRMD4B	Cardiometabolic_II	Weighted median	5	-0.136542	0.0539586	0.01139							rs10005886; rs10772275; rs12098656; rs7145596; rs78778914		NA	YES
GCST90027482	HISTSYN.PWY..L.histidine.biosynthesis	OID30155	FERM domain-containing protein 4B	Q9Y2L6	FRMD4B	Cardiometabolic_II	MR-PRESSO	5	-0.141069	0.0399351	0.0241771							rs10005886; rs10772275; rs12098656; rs7145596; rs78778914		NA	YES
GCST90027482	HISTSYN.PWY..L.histidine.biosynthesis	OID30423	Sprouty-related, EVH1 domain-containing protein 2	Q7Z698	SPRED2	Inflammation_II	Inverse variance weighted	5	-0.19712	0.0439002	7.11584e-06				1.77758	4	0.776581	rs10005886; rs10772275; rs12098656; rs7145596; rs78778914		0.000263285906997619	YES
GCST90027482	HISTSYN.PWY..L.histidine.biosynthesis	OID30423	Sprouty-related, EVH1 domain-containing protein 2	Q7Z698	SPRED2	Inflammation_II	MR Egger	5	-0.0522246	0.117995	0.688022	-0.0195216	0.014756	0.277649	0.0273597	3	0.998806	rs10005886; rs10772275; rs12098656; rs7145596; rs78778914		NA	YES
GCST90027482	HISTSYN.PWY..L.histidine.biosynthesis	OID30423	Sprouty-related, EVH1 domain-containing protein 2	Q7Z698	SPRED2	Inflammation_II	Weighted median	5	-0.170687	0.0598232	0.00432814							rs10005886; rs10772275; rs12098656; rs7145596; rs78778914		NA	YES
GCST90027482	HISTSYN.PWY..L.histidine.biosynthesis	OID30423	Sprouty-related, EVH1 domain-containing protein 2	Q7Z698	SPRED2	Inflammation_II	MR-PRESSO	5	-0.19712	0.0292652	0.00253142							rs10005886; rs10772275; rs12098656; rs7145596; rs78778914		NA	YES
GCST90027482	HISTSYN.PWY..L.histidine.biosynthesis	OID30465	1-phosphatidylinositol 3-phosphate 5-kinase	Q9Y2I7	PIKFYVE	Inflammation_II	Inverse variance weighted	5	-0.158694	0.0434303	0.000258187				1.82307	4	0.76826	rs10005886; rs10772275; rs12098656; rs7145596; rs78778914		0.00955293187514456	YES
GCST90027482	HISTSYN.PWY..L.histidine.biosynthesis	OID30465	1-phosphatidylinositol 3-phosphate 5-kinase	Q9Y2I7	PIKFYVE	Inflammation_II	MR Egger	5	-0.102784	0.116725	0.443388	-0.0075321	0.0145958	0.641448	1.55676	3	0.669232	rs10005886; rs10772275; rs12098656; rs7145596; rs78778914		NA	YES
GCST90027482	HISTSYN.PWY..L.histidine.biosynthesis	OID30465	1-phosphatidylinositol 3-phosphate 5-kinase	Q9Y2I7	PIKFYVE	Inflammation_II	Weighted median	5	-0.141028	0.0569792	0.0133209							rs10005886; rs10772275; rs12098656; rs7145596; rs78778914		NA	YES
GCST90027482	HISTSYN.PWY..L.histidine.biosynthesis	OID30465	1-phosphatidylinositol 3-phosphate 5-kinase	Q9Y2I7	PIKFYVE	Inflammation_II	MR-PRESSO	5	-0.158694	0.02932	0.0056451							rs10005886; rs10772275; rs12098656; rs7145596; rs78778914		NA	YES
GCST90027748	k__Bacteria.p__Actinobacteria	OID20584	T-cell surface glycoprotein CD4	P01730	CD4	Inflammation	Inverse variance weighted	8	-0.0992838	0.0299022	0.000899248				5.751	7	0.569106	rs12955365; rs182549; rs2197344; rs35344390; rs6044857; rs61939486; rs74452406; rs926010		0.01663779878087	YES
GCST90027748	k__Bacteria.p__Actinobacteria	OID20584	T-cell surface glycoprotein CD4	P01730	CD4	Inflammation	MR Egger	8	0.0746808	0.135026	0.600191	-0.0184027	0.013929	0.234588	4.00549	6	0.675934	rs12955365; rs182549; rs2197344; rs35344390; rs6044857; rs61939486; rs74452406; rs926010		NA	YES
GCST90027748	k__Bacteria.p__Actinobacteria	OID20584	T-cell surface glycoprotein CD4	P01730	CD4	Inflammation	Weighted median	8	-0.0935455	0.040434	0.0206931							rs12955365; rs182549; rs2197344; rs35344390; rs6044857; rs61939486; rs74452406; rs926010		NA	YES
GCST90027748	k__Bacteria.p__Actinobacteria	OID20584	T-cell surface glycoprotein CD4	P01730	CD4	Inflammation	MR-PRESSO	8	-0.0992838	0.0271035	0.0080369							rs12955365; rs182549; rs2197344; rs35344390; rs6044857; rs61939486; rs74452406; rs926010		NA	YES
GCST90027748	k__Bacteria.p__Actinobacteria	OID20586	Lymphotoxin-alpha	P01374	LTA	Inflammation	Inverse variance weighted	8	-0.0761022	0.0259757	0.00339239				5.47786	7	0.601855	rs12955365; rs182549; rs2197344; rs35344390; rs6044857; rs61939486; rs74452406; rs926010		0.0418394999025353	YES
GCST90027748	k__Bacteria.p__Actinobacteria	OID20586	Lymphotoxin-alpha	P01374	LTA	Inflammation	MR Egger	8	0.0034595	0.116957	0.977362	-0.00849506	0.012176	0.511488	4.99109	6	0.544956	rs12955365; rs182549; rs2197344; rs35344390; rs6044857; rs61939486; rs74452406; rs926010		NA	YES
GCST90027748	k__Bacteria.p__Actinobacteria	OID20586	Lymphotoxin-alpha	P01374	LTA	Inflammation	Weighted median	8	-0.0966954	0.0358914	0.00705769							rs12955365; rs182549; rs2197344; rs35344390; rs6044857; rs61939486; rs74452406; rs926010		NA	YES
GCST90027748	k__Bacteria.p__Actinobacteria	OID20586	Lymphotoxin-alpha	P01374	LTA	Inflammation	MR-PRESSO	8	-0.0761022	0.0229786	0.0129083							rs12955365; rs182549; rs2197344; rs35344390; rs6044857; rs61939486; rs74452406; rs926010		NA	YES
GCST90027748	k__Bacteria.p__Actinobacteria	OID20611	Tumor necrosis factor ligand superfamily member 10	P50591	TNFSF10	Inflammation	Inverse variance weighted	8	-0.0875273	0.0290219	0.00256215				4.59917	7	0.708745	rs12955365; rs182549; rs2197344; rs35344390; rs6044857; rs61939486; rs74452406; rs926010		0.0474054773616014	YES
GCST90027748	k__Bacteria.p__Actinobacteria	OID20611	Tumor necrosis factor ligand superfamily member 10	P50591	TNFSF10	Inflammation	MR Egger	8	-0.123712	0.131227	0.382209	0.00382842	0.0135403	0.786875	4.51922	6	0.606776	rs12955365; rs182549; rs2197344; rs35344390; rs6044857; rs61939486; rs74452406; rs926010		NA	YES
GCST90027748	k__Bacteria.p__Actinobacteria	OID20611	Tumor necrosis factor ligand superfamily member 10	P50591	TNFSF10	Inflammation	Weighted median	8	-0.107408	0.0388219	0.00566309							rs12955365; rs182549; rs2197344; rs35344390; rs6044857; rs61939486; rs74452406; rs926010		NA	YES
GCST90027748	k__Bacteria.p__Actinobacteria	OID20611	Tumor necrosis factor ligand superfamily member 10	P50591	TNFSF10	Inflammation	MR-PRESSO	8	-0.0875273	0.0235243	0.00744904							rs12955365; rs182549; rs2197344; rs35344390; rs6044857; rs61939486; rs74452406; rs926010		NA	YES
GCST90027748	k__Bacteria.p__Actinobacteria	OID20697	C-X-C motif chemokine 10	P02778	CXCL10	Inflammation	Inverse variance weighted	8	-0.112281	0.0296365	0.00015149				3.47933	7	0.83741	rs12955365; rs182549; rs2197344; rs35344390; rs6044857; rs61939486; rs74452406; rs926010		0.00280255783033438	YES
GCST90027748	k__Bacteria.p__Actinobacteria	OID20697	C-X-C motif chemokine 10	P02778	CXCL10	Inflammation	MR Egger	8	-0.0762455	0.133902	0.589742	-0.00381424	0.0138215	0.791835	3.40317	6	0.756804	rs12955365; rs182549; rs2197344; rs35344390; rs6044857; rs61939486; rs74452406; rs926010		NA	YES
GCST90027748	k__Bacteria.p__Actinobacteria	OID20697	C-X-C motif chemokine 10	P02778	CXCL10	Inflammation	Weighted median	8	-0.122281	0.0378713	0.00124285							rs12955365; rs182549; rs2197344; rs35344390; rs6044857; rs61939486; rs74452406; rs926010		NA	YES
GCST90027748	k__Bacteria.p__Actinobacteria	OID20697	C-X-C motif chemokine 10	P02778	CXCL10	Inflammation	MR-PRESSO	8	-0.112281	0.0208942	0.00103726							rs12955365; rs182549; rs2197344; rs35344390; rs6044857; rs61939486; rs74452406; rs926010		NA	YES
GCST90027748	k__Bacteria.p__Actinobacteria	OID20733	Tumor necrosis factor ligand superfamily member 13	O75888	TNFSF13	Inflammation	Inverse variance weighted	8	-0.0806451	0.0285534	0.00473749				1.6638	7	0.976092	rs12955365; rs182549; rs2197344; rs35344390; rs6044857; rs61939486; rs74452406; rs926010		0.0438235037950301	YES
GCST90027748	k__Bacteria.p__Actinobacteria	OID20733	Tumor necrosis factor ligand superfamily member 13	O75888	TNFSF13	Inflammation	MR Egger	8	-0.135481	0.129014	0.334106	0.00580453	0.0133179	0.678194	1.47384	6	0.961213	rs12955365; rs182549; rs2197344; rs35344390; rs6044857; rs61939486; rs74452406; rs926010		NA	YES
GCST90027748	k__Bacteria.p__Actinobacteria	OID20733	Tumor necrosis factor ligand superfamily member 13	O75888	TNFSF13	Inflammation	Weighted median	8	-0.104197	0.0363401	0.00414011							rs12955365; rs182549; rs2197344; rs35344390; rs6044857; rs61939486; rs74452406; rs926010		NA	YES
GCST90027748	k__Bacteria.p__Actinobacteria	OID20733	Tumor necrosis factor ligand superfamily member 13	O75888	TNFSF13	Inflammation	MR-PRESSO	8	-0.0806451	0.0139206	0.000668166							rs12955365; rs182549; rs2197344; rs35344390; rs6044857; rs61939486; rs74452406; rs926010		NA	YES
GCST90027748	k__Bacteria.p__Actinobacteria	OID20776	Osteoclast-associated immunoglobulin-like receptor	Q8IYS5	OSCAR	Inflammation	Inverse variance weighted	8	-0.0895973	0.0265654	0.00074432				5.86188	7	0.555967	rs12955365; rs182549; rs2197344; rs35344390; rs6044857; rs61939486; rs74452406; rs926010		0.0137699204674701	YES
GCST90027748	k__Bacteria.p__Actinobacteria	OID20776	Osteoclast-associated immunoglobulin-like receptor	Q8IYS5	OSCAR	Inflammation	MR Egger	8	-0.0709587	0.120022	0.575957	-0.00197287	0.0123891	0.878703	5.83652	6	0.44175	rs12955365; rs182549; rs2197344; rs35344390; rs6044857; rs61939486; rs74452406; rs926010		NA	YES
GCST90027748	k__Bacteria.p__Actinobacteria	OID20776	Osteoclast-associated immunoglobulin-like receptor	Q8IYS5	OSCAR	Inflammation	Weighted median	8	-0.0731746	0.0362865	0.0437398							rs12955365; rs182549; rs2197344; rs35344390; rs6044857; rs61939486; rs74452406; rs926010		NA	YES
GCST90027748	k__Bacteria.p__Actinobacteria	OID20776	Osteoclast-associated immunoglobulin-like receptor	Q8IYS5	OSCAR	Inflammation	MR-PRESSO	8	-0.0895973	0.02431	0.00780164							rs12955365; rs182549; rs2197344; rs35344390; rs6044857; rs61939486; rs74452406; rs926010		NA	YES
GCST90027748	k__Bacteria.p__Actinobacteria	OID30641	B-cell differentiation antigen CD72	P21854	CD72	Inflammation_II	Inverse variance weighted	8	-0.108175	0.0334876	0.0012366				8.31281	7	0.30582	rs12955365; rs182549; rs2197344; rs35344390; rs6044857; rs61939486; rs74452406; rs926010		0.0228771406874	YES
GCST90027748	k__Bacteria.p__Actinobacteria	OID30641	B-cell differentiation antigen CD72	P21854	CD72	Inflammation_II	MR Egger	8	0.00133389	0.156828	0.993489	-0.0115943	0.0161922	0.50087	7.65838	6	0.264214	rs12955365; rs182549; rs2197344; rs35344390; rs6044857; rs61939486; rs74452406; rs926010		NA	YES
GCST90027748	k__Bacteria.p__Actinobacteria	OID30641	B-cell differentiation antigen CD72	P21854	CD72	Inflammation_II	Weighted median	8	-0.110243	0.044781	0.0138237							rs12955365; rs182549; rs2197344; rs35344390; rs6044857; rs61939486; rs74452406; rs926010		NA	YES
GCST90027748	k__Bacteria.p__Actinobacteria	OID30641	B-cell differentiation antigen CD72	P21854	CD72	Inflammation_II	MR-PRESSO	8	-0.108175	0.0334876	0.0144457							rs12955365; rs182549; rs2197344; rs35344390; rs6044857; rs61939486; rs74452406; rs926010		NA	YES
GCST90027651	k__Bacteria.p__Actinobacteria.c__Actinobacteria	OID20584	T-cell surface glycoprotein CD4	P01730	CD4	Inflammation	Inverse variance weighted	8	-0.099284	0.0299025	0.00089934				5.75119	7	0.569083	rs12955365; rs182549; rs2197344; rs35344390; rs6044857; rs61939486; rs74452406; rs926010		0.01663779878087	YES
GCST90027651	k__Bacteria.p__Actinobacteria.c__Actinobacteria	OID20584	T-cell surface glycoprotein CD4	P01730	CD4	Inflammation	MR Egger	8	0.0746826	0.135019	0.600164	-0.0184028	0.0139281	0.23456	4.00544	6	0.67594	rs12955365; rs182549; rs2197344; rs35344390; rs6044857; rs61939486; rs74452406; rs926010		NA	YES
GCST90027651	k__Bacteria.p__Actinobacteria.c__Actinobacteria	OID20584	T-cell surface glycoprotein CD4	P01730	CD4	Inflammation	Weighted median	8	-0.0935392	0.043121	0.0300656							rs12955365; rs182549; rs2197344; rs35344390; rs6044857; rs61939486; rs74452406; rs926010		NA	YES
GCST90027651	k__Bacteria.p__Actinobacteria.c__Actinobacteria	OID20584	T-cell surface glycoprotein CD4	P01730	CD4	Inflammation	MR-PRESSO	8	-0.099284	0.0271043	0.00803788							rs12955365; rs182549; rs2197344; rs35344390; rs6044857; rs61939486; rs74452406; rs926010		NA	YES
GCST90027651	k__Bacteria.p__Actinobacteria.c__Actinobacteria	OID20586	Lymphotoxin-alpha	P01374	LTA	Inflammation	Inverse variance weighted	8	-0.0761029	0.0259759	0.00339237				5.47785	7	0.601856	rs12955365; rs182549; rs2197344; rs35344390; rs6044857; rs61939486; rs74452406; rs926010		0.0418394999025353	YES
GCST90027651	k__Bacteria.p__Actinobacteria.c__Actinobacteria	OID20586	Lymphotoxin-alpha	P01374	LTA	Inflammation	MR Egger	8	0.00345383	0.116951	0.977398	-0.00849448	0.0121753	0.511493	4.9911	6	0.544956	rs12955365; rs182549; rs2197344; rs35344390; rs6044857; rs61939486; rs74452406; rs926010		NA	YES
GCST90027651	k__Bacteria.p__Actinobacteria.c__Actinobacteria	OID20586	Lymphotoxin-alpha	P01374	LTA	Inflammation	Weighted median	8	-0.0966915	0.0364282	0.00794713							rs12955365; rs182549; rs2197344; rs35344390; rs6044857; rs61939486; rs74452406; rs926010		NA	YES
GCST90027651	k__Bacteria.p__Actinobacteria.c__Actinobacteria	OID20586	Lymphotoxin-alpha	P01374	LTA	Inflammation	MR-PRESSO	8	-0.0761029	0.0229788	0.0129082							rs12955365; rs182549; rs2197344; rs35344390; rs6044857; rs61939486; rs74452406; rs926010		NA	YES
GCST90027651	k__Bacteria.p__Actinobacteria.c__Actinobacteria	OID20611	Tumor necrosis factor ligand superfamily member 10	P50591	TNFSF10	Inflammation	Inverse variance weighted	8	-0.0875271	0.0290222	0.00256246				4.59939	7	0.708719	rs12955365; rs182549; rs2197344; rs35344390; rs6044857; rs61939486; rs74452406; rs926010		0.0474054773616014	YES
GCST90027651	k__Bacteria.p__Actinobacteria.c__Actinobacteria	OID20611	Tumor necrosis factor ligand superfamily member 10	P50591	TNFSF10	Inflammation	MR Egger	8	-0.123681	0.131219	0.382296	0.00382514	0.0135394	0.787038	4.51957	6	0.60673	rs12955365; rs182549; rs2197344; rs35344390; rs6044857; rs61939486; rs74452406; rs926010		NA	YES
GCST90027651	k__Bacteria.p__Actinobacteria.c__Actinobacteria	OID20611	Tumor necrosis factor ligand superfamily member 10	P50591	TNFSF10	Inflammation	Weighted median	8	-0.107416	0.0382284	0.00495664							rs12955365; rs182549; rs2197344; rs35344390; rs6044857; rs61939486; rs74452406; rs926010		NA	YES
GCST90027651	k__Bacteria.p__Actinobacteria.c__Actinobacteria	OID20611	Tumor necrosis factor ligand superfamily member 10	P50591	TNFSF10	Inflammation	MR-PRESSO	8	-0.0875271	0.0235251	0.00745034							rs12955365; rs182549; rs2197344; rs35344390; rs6044857; rs61939486; rs74452406; rs926010		NA	YES
GCST90027651	k__Bacteria.p__Actinobacteria.c__Actinobacteria	OID20697	C-X-C motif chemokine 10	P02778	CXCL10	Inflammation	Inverse variance weighted	8	-0.112284	0.0296368	0.000151465				3.47903	7	0.837442	rs12955365; rs182549; rs2197344; rs35344390; rs6044857; rs61939486; rs74452406; rs926010		0.00280255783033438	YES
GCST90027651	k__Bacteria.p__Actinobacteria.c__Actinobacteria	OID20697	C-X-C motif chemokine 10	P02778	CXCL10	Inflammation	MR Egger	8	-0.0762678	0.133895	0.589616	-0.00381211	0.0138206	0.791935	3.40295	6	0.756834	rs12955365; rs182549; rs2197344; rs35344390; rs6044857; rs61939486; rs74452406; rs926010		NA	YES
GCST90027651	k__Bacteria.p__Actinobacteria.c__Actinobacteria	OID20697	C-X-C motif chemokine 10	P02778	CXCL10	Inflammation	Weighted median	8	-0.122279	0.0395454	0.0019874							rs12955365; rs182549; rs2197344; rs35344390; rs6044857; rs61939486; rs74452406; rs926010		NA	YES
GCST90027651	k__Bacteria.p__Actinobacteria.c__Actinobacteria	OID20697	C-X-C motif chemokine 10	P02778	CXCL10	Inflammation	MR-PRESSO	8	-0.112284	0.0208935	0.00103694							rs12955365; rs182549; rs2197344; rs35344390; rs6044857; rs61939486; rs74452406; rs926010		NA	YES
GCST90027651	k__Bacteria.p__Actinobacteria.c__Actinobacteria	OID20733	Tumor necrosis factor ligand superfamily member 13	O75888	TNFSF13	Inflammation	Inverse variance weighted	8	-0.0806456	0.0285537	0.00473768				1.66387	7	0.976089	rs12955365; rs182549; rs2197344; rs35344390; rs6044857; rs61939486; rs74452406; rs926010		0.0438235037950301	YES
GCST90027651	k__Bacteria.p__Actinobacteria.c__Actinobacteria	OID20733	Tumor necrosis factor ligand superfamily member 13	O75888	TNFSF13	Inflammation	MR Egger	8	-0.135462	0.129007	0.334143	0.00580249	0.013317	0.678279	1.47402	6	0.961202	rs12955365; rs182549; rs2197344; rs35344390; rs6044857; rs61939486; rs74452406; rs926010		NA	YES
GCST90027651	k__Bacteria.p__Actinobacteria.c__Actinobacteria	OID20733	Tumor necrosis factor ligand superfamily member 13	O75888	TNFSF13	Inflammation	Weighted median	8	-0.10419	0.0361849	0.00398471							rs12955365; rs182549; rs2197344; rs35344390; rs6044857; rs61939486; rs74452406; rs926010		NA	YES
GCST90027651	k__Bacteria.p__Actinobacteria.c__Actinobacteria	OID20733	Tumor necrosis factor ligand superfamily member 13	O75888	TNFSF13	Inflammation	MR-PRESSO	8	-0.0806456	0.0139211	0.000668267							rs12955365; rs182549; rs2197344; rs35344390; rs6044857; rs61939486; rs74452406; rs926010		NA	YES
GCST90027651	k__Bacteria.p__Actinobacteria.c__Actinobacteria	OID20776	Osteoclast-associated immunoglobulin-like receptor	Q8IYS5	OSCAR	Inflammation	Inverse variance weighted	8	-0.0895985	0.0265656	0.000744297				5.86182	7	0.555974	rs12955365; rs182549; rs2197344; rs35344390; rs6044857; rs61939486; rs74452406; rs926010		0.0137699204674701	YES
GCST90027651	k__Bacteria.p__Actinobacteria.c__Actinobacteria	OID20776	Osteoclast-associated immunoglobulin-like receptor	Q8IYS5	OSCAR	Inflammation	MR Egger	8	-0.0709608	0.120016	0.575926	-0.00197276	0.0123883	0.878702	5.83646	6	0.441757	rs12955365; rs182549; rs2197344; rs35344390; rs6044857; rs61939486; rs74452406; rs926010		NA	YES
GCST90027651	k__Bacteria.p__Actinobacteria.c__Actinobacteria	OID20776	Osteoclast-associated immunoglobulin-like receptor	Q8IYS5	OSCAR	Inflammation	Weighted median	8	-0.0731786	0.0365115	0.0450419							rs12955365; rs182549; rs2197344; rs35344390; rs6044857; rs61939486; rs74452406; rs926010		NA	YES
GCST90027651	k__Bacteria.p__Actinobacteria.c__Actinobacteria	OID20776	Osteoclast-associated immunoglobulin-like receptor	Q8IYS5	OSCAR	Inflammation	MR-PRESSO	8	-0.0895985	0.0243101	0.00780135							rs12955365; rs182549; rs2197344; rs35344390; rs6044857; rs61939486; rs74452406; rs926010		NA	YES
GCST90027651	k__Bacteria.p__Actinobacteria.c__Actinobacteria	OID30641	B-cell differentiation antigen CD72	P21854	CD72	Inflammation_II	Inverse variance weighted	8	-0.108177	0.0334879	0.00123651				8.31274	7	0.305826	rs12955365; rs182549; rs2197344; rs35344390; rs6044857; rs61939486; rs74452406; rs926010		0.0228771406874	YES
GCST90027651	k__Bacteria.p__Actinobacteria.c__Actinobacteria	OID30641	B-cell differentiation antigen CD72	P21854	CD72	Inflammation_II	MR Egger	8	0.00132036	0.156819	0.993555	-0.0115929	0.0161911	0.500892	7.65838	6	0.264214	rs12955365; rs182549; rs2197344; rs35344390; rs6044857; rs61939486; rs74452406; rs926010		NA	YES
GCST90027651	k__Bacteria.p__Actinobacteria.c__Actinobacteria	OID30641	B-cell differentiation antigen CD72	P21854	CD72	Inflammation_II	Weighted median	8	-0.110238	0.0432591	0.0108243							rs12955365; rs182549; rs2197344; rs35344390; rs6044857; rs61939486; rs74452406; rs926010		NA	YES
GCST90027651	k__Bacteria.p__Actinobacteria.c__Actinobacteria	OID30641	B-cell differentiation antigen CD72	P21854	CD72	Inflammation_II	MR-PRESSO	8	-0.108177	0.0334879	0.0144453							rs12955365; rs182549; rs2197344; rs35344390; rs6044857; rs61939486; rs74452406; rs926010		NA	YES
GCST90027736	k__Bacteria.p__Actinobacteria.c__Actinobacteria.o__Bifidobacteriales	OID20210	Macrophage receptor MARCO	Q9UEW3	MARCO	Cardiometabolic	Inverse variance weighted	6	-0.127841	0.0327817	9.62812e-05				4.85188	5	0.434223	rs10455532; rs12657170; rs182549; rs4851317; rs4859454; rs74452406		0.00178120165227115	YES
GCST90027736	k__Bacteria.p__Actinobacteria.c__Actinobacteria.o__Bifidobacteriales	OID20210	Macrophage receptor MARCO	Q9UEW3	MARCO	Cardiometabolic	MR Egger	6	-0.280683	0.104493	0.054878	0.0173697	0.0112756	0.198294	2.47886	4	0.648425	rs10455532; rs12657170; rs182549; rs4851317; rs4859454; rs74452406		NA	YES
GCST90027736	k__Bacteria.p__Actinobacteria.c__Actinobacteria.o__Bifidobacteriales	OID20210	Macrophage receptor MARCO	Q9UEW3	MARCO	Cardiometabolic	Weighted median	6	-0.110982	0.0484768	0.0220566							rs10455532; rs12657170; rs182549; rs4851317; rs4859454; rs74452406		NA	YES
GCST90027736	k__Bacteria.p__Actinobacteria.c__Actinobacteria.o__Bifidobacteriales	OID20210	Macrophage receptor MARCO	Q9UEW3	MARCO	Cardiometabolic	MR-PRESSO	6	-0.127841	0.0322925	0.0107551							rs10455532; rs12657170; rs182549; rs4851317; rs4859454; rs74452406		NA	YES
GCST90027736	k__Bacteria.p__Actinobacteria.c__Actinobacteria.o__Bifidobacteriales	OID20548	Carcinoembryonic antigen-related cell adhesion molecule 21	Q3KPI0	CEACAM21	Inflammation	Inverse variance weighted	6	-0.0700115	0.0219893	0.00145311				1.22601	5	0.942358	rs10455532; rs12657170; rs182549; rs4851317; rs4859454; rs74452406		0.0179217468765496	YES
GCST90027736	k__Bacteria.p__Actinobacteria.c__Actinobacteria.o__Bifidobacteriales	OID20548	Carcinoembryonic antigen-related cell adhesion molecule 21	Q3KPI0	CEACAM21	Inflammation	MR Egger	6	-0.0886566	0.0701413	0.274881	0.00212232	0.00758149	0.793408	1.14765	4	0.88664	rs10455532; rs12657170; rs182549; rs4851317; rs4859454; rs74452406		NA	YES
GCST90027736	k__Bacteria.p__Actinobacteria.c__Actinobacteria.o__Bifidobacteriales	OID20548	Carcinoembryonic antigen-related cell adhesion molecule 21	Q3KPI0	CEACAM21	Inflammation	Weighted median	6	-0.0747858	0.0282776	0.00817624							rs10455532; rs12657170; rs182549; rs4851317; rs4859454; rs74452406		NA	YES
GCST90027736	k__Bacteria.p__Actinobacteria.c__Actinobacteria.o__Bifidobacteriales	OID20548	Carcinoembryonic antigen-related cell adhesion molecule 21	Q3KPI0	CEACAM21	Inflammation	MR-PRESSO	6	-0.0700115	0.0108886	0.00135171							rs10455532; rs12657170; rs182549; rs4851317; rs4859454; rs74452406		NA	YES
GCST90027736	k__Bacteria.p__Actinobacteria.c__Actinobacteria.o__Bifidobacteriales	OID20733	Tumor necrosis factor ligand superfamily member 13	O75888	TNFSF13	Inflammation	Inverse variance weighted	6	-0.0894842	0.0314119	0.0043893				1.32404	5	0.932439	rs10455532; rs12657170; rs182549; rs4851317; rs4859454; rs74452406		0.0438235037950301	YES
GCST90027736	k__Bacteria.p__Actinobacteria.c__Actinobacteria.o__Bifidobacteriales	OID20733	Tumor necrosis factor ligand superfamily member 13	O75888	TNFSF13	Inflammation	MR Egger	6	-0.0406849	0.100199	0.705496	-0.00555617	0.0108333	0.635062	1.06099	4	0.90041	rs10455532; rs12657170; rs182549; rs4851317; rs4859454; rs74452406		NA	YES
GCST90027736	k__Bacteria.p__Actinobacteria.c__Actinobacteria.o__Bifidobacteriales	OID20733	Tumor necrosis factor ligand superfamily member 13	O75888	TNFSF13	Inflammation	Weighted median	6	-0.0945509	0.038928	0.0151461							rs10455532; rs12657170; rs182549; rs4851317; rs4859454; rs74452406		NA	YES
GCST90027736	k__Bacteria.p__Actinobacteria.c__Actinobacteria.o__Bifidobacteriales	OID20733	Tumor necrosis factor ligand superfamily member 13	O75888	TNFSF13	Inflammation	MR-PRESSO	6	-0.0894842	0.0161644	0.00263862							rs10455532; rs12657170; rs182549; rs4851317; rs4859454; rs74452406		NA	YES
GCST90027736	k__Bacteria.p__Actinobacteria.c__Actinobacteria.o__Bifidobacteriales	OID20776	Osteoclast-associated immunoglobulin-like receptor	Q8IYS5	OSCAR	Inflammation	Inverse variance weighted	6	-0.108762	0.0371106	0.00338141				8.06073	5	0.15292	rs10455532; rs12657170; rs182549; rs4851317; rs4859454; rs74452406		0.0250387150691934	YES
GCST90027736	k__Bacteria.p__Actinobacteria.c__Actinobacteria.o__Bifidobacteriales	OID20776	Osteoclast-associated immunoglobulin-like receptor	Q8IYS5	OSCAR	Inflammation	MR Egger	6	-0.000906185	0.119536	0.994314	-0.0122821	0.0129259	0.395819	6.57633	4	0.160044	rs10455532; rs12657170; rs182549; rs4851317; rs4859454; rs74452406		NA	YES
GCST90027736	k__Bacteria.p__Actinobacteria.c__Actinobacteria.o__Bifidobacteriales	OID20776	Osteoclast-associated immunoglobulin-like receptor	Q8IYS5	OSCAR	Inflammation	Weighted median	6	-0.0839706	0.0417291	0.0441906							rs10455532; rs12657170; rs182549; rs4851317; rs4859454; rs74452406		NA	YES
GCST90027736	k__Bacteria.p__Actinobacteria.c__Actinobacteria.o__Bifidobacteriales	OID30347	Melanotransferrin	P08582	MELTF	Cardiometabolic_II	Weighted median	6	0.111431	0.0385255	0.00382313							rs10455532; rs12657170; rs182549; rs4851317; rs4859454; rs74452406		NA	YES
GCST90027736	k__Bacteria.p__Actinobacteria.c__Actinobacteria.o__Bifidobacteriales	OID20776	Osteoclast-associated immunoglobulin-like receptor	Q8IYS5	OSCAR	Inflammation	MR-PRESSO	6	-0.108762	0.0371106	0.0326042							rs10455532; rs12657170; rs182549; rs4851317; rs4859454; rs74452406		NA	YES
GCST90027736	k__Bacteria.p__Actinobacteria.c__Actinobacteria.o__Bifidobacteriales	OID30347	Melanotransferrin	P08582	MELTF	Cardiometabolic_II	Inverse variance weighted	6	0.10122	0.0303459	0.000851364				2.32457	5	0.802652	rs10455532; rs12657170; rs182549; rs4851317; rs4859454; rs74452406		0.0105001512016656	YES
GCST90027736	k__Bacteria.p__Actinobacteria.c__Actinobacteria.o__Bifidobacteriales	OID30347	Melanotransferrin	P08582	MELTF	Cardiometabolic_II	MR Egger	6	0.1454	0.0981389	0.212578	-0.00497262	0.0105045	0.660619	2.10048	4	0.717284	rs10455532; rs12657170; rs182549; rs4851317; rs4859454; rs74452406		NA	YES
GCST90027736	k__Bacteria.p__Actinobacteria.c__Actinobacteria.o__Bifidobacteriales	OID30641	B-cell differentiation antigen CD72	P21854	CD72	Inflammation_II	Weighted median	6	-0.115743	0.0425621	0.00654008							rs10455532; rs12657170; rs182549; rs4851317; rs4859454; rs74452406		NA	YES
GCST90027736	k__Bacteria.p__Actinobacteria.c__Actinobacteria.o__Bifidobacteriales	OID30347	Melanotransferrin	P08582	MELTF	Cardiometabolic_II	MR-PRESSO	6	0.10122	0.0206912	0.00450602							rs10455532; rs12657170; rs182549; rs4851317; rs4859454; rs74452406		NA	YES
GCST90027736	k__Bacteria.p__Actinobacteria.c__Actinobacteria.o__Bifidobacteriales	OID30641	B-cell differentiation antigen CD72	P21854	CD72	Inflammation_II	Inverse variance weighted	6	-0.0946716	0.0337957	0.00508983				2.62021	5	0.758293	rs10455532; rs12657170; rs182549; rs4851317; rs4859454; rs74452406		0.0470950019275574	YES
GCST90027736	k__Bacteria.p__Actinobacteria.c__Actinobacteria.o__Bifidobacteriales	OID30641	B-cell differentiation antigen CD72	P21854	CD72	Inflammation_II	MR Egger	6	-0.0591444	0.107811	0.612465	-0.00404741	0.0116632	0.746062	2.49978	4	0.644675	rs10455532; rs12657170; rs182549; rs4851317; rs4859454; rs74452406		NA	YES
GCST90027736	k__Bacteria.p__Actinobacteria.c__Actinobacteria.o__Bifidobacteriales	OID30641	B-cell differentiation antigen CD72	P21854	CD72	Inflammation_II	MR-PRESSO	6	-0.0946716	0.0244649	0.011764							rs10455532; rs12657170; rs182549; rs4851317; rs4859454; rs74452406		NA	YES
GCST90027662	k__Bacteria.p__Actinobacteria.c__Actinobacteria.o__Bifidobacteriales.f__Bifidobacteriaceae	OID20210	Macrophage receptor MARCO	Q9UEW3	MARCO	Cardiometabolic	Inverse variance weighted	6	-0.12784	0.0327795	9.61914e-05				4.85012	5	0.434444	rs10455532; rs12657170; rs182549; rs4851317; rs4859454; rs74452406		0.00178120165227115	YES
GCST90027662	k__Bacteria.p__Actinobacteria.c__Actinobacteria.o__Bifidobacteriales.f__Bifidobacteriaceae	OID20210	Macrophage receptor MARCO	Q9UEW3	MARCO	Cardiometabolic	MR Egger	6	-0.280521	0.104436	0.0548817	0.0173535	0.0112702	0.198455	2.47922	4	0.648361	rs10455532; rs12657170; rs182549; rs4851317; rs4859454; rs74452406		NA	YES
GCST90027662	k__Bacteria.p__Actinobacteria.c__Actinobacteria.o__Bifidobacteriales.f__Bifidobacteriaceae	OID20210	Macrophage receptor MARCO	Q9UEW3	MARCO	Cardiometabolic	Weighted median	6	-0.110947	0.0476632	0.0199261							rs10455532; rs12657170; rs182549; rs4851317; rs4859454; rs74452406		NA	YES
GCST90027662	k__Bacteria.p__Actinobacteria.c__Actinobacteria.o__Bifidobacteriales.f__Bifidobacteriaceae	OID20210	Macrophage receptor MARCO	Q9UEW3	MARCO	Cardiometabolic	MR-PRESSO	6	-0.12784	0.0322845	0.010745							rs10455532; rs12657170; rs182549; rs4851317; rs4859454; rs74452406		NA	YES
GCST90027662	k__Bacteria.p__Actinobacteria.c__Actinobacteria.o__Bifidobacteriales.f__Bifidobacteriaceae	OID20548	Carcinoembryonic antigen-related cell adhesion molecule 21	Q3KPI0	CEACAM21	Inflammation	Inverse variance weighted	6	-0.0700076	0.0219878	0.00145292				1.22577	5	0.942381	rs10455532; rs12657170; rs182549; rs4851317; rs4859454; rs74452406		0.0179217468765496	YES
GCST90027662	k__Bacteria.p__Actinobacteria.c__Actinobacteria.o__Bifidobacteriales.f__Bifidobacteriaceae	OID20548	Carcinoembryonic antigen-related cell adhesion molecule 21	Q3KPI0	CEACAM21	Inflammation	MR Egger	6	-0.0886067	0.0701029	0.274887	0.00211733	0.00757785	0.793782	1.1477	4	0.886632	rs10455532; rs12657170; rs182549; rs4851317; rs4859454; rs74452406		NA	YES
GCST90027662	k__Bacteria.p__Actinobacteria.c__Actinobacteria.o__Bifidobacteriales.f__Bifidobacteriaceae	OID20548	Carcinoembryonic antigen-related cell adhesion molecule 21	Q3KPI0	CEACAM21	Inflammation	Weighted median	6	-0.0747821	0.0277461	0.00703395							rs10455532; rs12657170; rs182549; rs4851317; rs4859454; rs74452406		NA	YES
GCST90027662	k__Bacteria.p__Actinobacteria.c__Actinobacteria.o__Bifidobacteriales.f__Bifidobacteriaceae	OID20548	Carcinoembryonic antigen-related cell adhesion molecule 21	Q3KPI0	CEACAM21	Inflammation	MR-PRESSO	6	-0.0700076	0.0108868	0.00135103							rs10455532; rs12657170; rs182549; rs4851317; rs4859454; rs74452406		NA	YES
GCST90027662	k__Bacteria.p__Actinobacteria.c__Actinobacteria.o__Bifidobacteriales.f__Bifidobacteriaceae	OID20733	Tumor necrosis factor ligand superfamily member 13	O75888	TNFSF13	Inflammation	Inverse variance weighted	6	-0.0894764	0.0314098	0.00439009				1.32436	5	0.932405	rs10455532; rs12657170; rs182549; rs4851317; rs4859454; rs74452406		0.0438235037950301	YES
GCST90027662	k__Bacteria.p__Actinobacteria.c__Actinobacteria.o__Bifidobacteriales.f__Bifidobacteriaceae	OID20733	Tumor necrosis factor ligand superfamily member 13	O75888	TNFSF13	Inflammation	MR Egger	6	-0.0406704	0.100144	0.705443	-0.00555759	0.0108281	0.63482	1.06093	4	0.90042	rs10455532; rs12657170; rs182549; rs4851317; rs4859454; rs74452406		NA	YES
GCST90027662	k__Bacteria.p__Actinobacteria.c__Actinobacteria.o__Bifidobacteriales.f__Bifidobacteriaceae	OID20733	Tumor necrosis factor ligand superfamily member 13	O75888	TNFSF13	Inflammation	Weighted median	6	-0.0945458	0.0398848	0.0177654							rs10455532; rs12657170; rs182549; rs4851317; rs4859454; rs74452406		NA	YES
GCST90027662	k__Bacteria.p__Actinobacteria.c__Actinobacteria.o__Bifidobacteriales.f__Bifidobacteriaceae	OID20733	Tumor necrosis factor ligand superfamily member 13	O75888	TNFSF13	Inflammation	MR-PRESSO	6	-0.0894764	0.0161653	0.00264027							rs10455532; rs12657170; rs182549; rs4851317; rs4859454; rs74452406		NA	YES
GCST90027662	k__Bacteria.p__Actinobacteria.c__Actinobacteria.o__Bifidobacteriales.f__Bifidobacteriaceae	OID20776	Osteoclast-associated immunoglobulin-like receptor	Q8IYS5	OSCAR	Inflammation	Inverse variance weighted	6	-0.108752	0.0371098	0.00338361				8.06143	5	0.152882	rs10455532; rs12657170; rs182549; rs4851317; rs4859454; rs74452406		0.0250387150691934	YES
GCST90027662	k__Bacteria.p__Actinobacteria.c__Actinobacteria.o__Bifidobacteriales.f__Bifidobacteriaceae	OID20776	Osteoclast-associated immunoglobulin-like receptor	Q8IYS5	OSCAR	Inflammation	MR Egger	6	-0.000935028	0.11947	0.99413	-0.0122792	0.0129197	0.395716	6.57633	4	0.160044	rs10455532; rs12657170; rs182549; rs4851317; rs4859454; rs74452406		NA	YES
GCST90027662	k__Bacteria.p__Actinobacteria.c__Actinobacteria.o__Bifidobacteriales.f__Bifidobacteriaceae	OID20776	Osteoclast-associated immunoglobulin-like receptor	Q8IYS5	OSCAR	Inflammation	Weighted median	6	-0.0839538	0.0385929	0.0296022							rs10455532; rs12657170; rs182549; rs4851317; rs4859454; rs74452406		NA	YES
GCST90027662	k__Bacteria.p__Actinobacteria.c__Actinobacteria.o__Bifidobacteriales.f__Bifidobacteriaceae	OID20776	Osteoclast-associated immunoglobulin-like receptor	Q8IYS5	OSCAR	Inflammation	MR-PRESSO	6	-0.108752	0.0371098	0.0326119							rs10455532; rs12657170; rs182549; rs4851317; rs4859454; rs74452406		NA	YES
GCST90027662	k__Bacteria.p__Actinobacteria.c__Actinobacteria.o__Bifidobacteriales.f__Bifidobacteriaceae	OID30347	Melanotransferrin	P08582	MELTF	Cardiometabolic_II	Inverse variance weighted	6	0.101216	0.0303442	0.000851122				2.32404	5	0.802729	rs10455532; rs12657170; rs182549; rs4851317; rs4859454; rs74452406		0.0105001512016656	YES
GCST90027662	k__Bacteria.p__Actinobacteria.c__Actinobacteria.o__Bifidobacteriales.f__Bifidobacteriaceae	OID30347	Melanotransferrin	P08582	MELTF	Cardiometabolic_II	MR Egger	6	0.145325	0.098087	0.212573	-0.00496511	0.0104995	0.660941	2.10042	4	0.717296	rs10455532; rs12657170; rs182549; rs4851317; rs4859454; rs74452406		NA	YES
GCST90027662	k__Bacteria.p__Actinobacteria.c__Actinobacteria.o__Bifidobacteriales.f__Bifidobacteriaceae	OID30347	Melanotransferrin	P08582	MELTF	Cardiometabolic_II	Weighted median	6	0.11143	0.0381129	0.00345929							rs10455532; rs12657170; rs182549; rs4851317; rs4859454; rs74452406		NA	YES
GCST90027662	k__Bacteria.p__Actinobacteria.c__Actinobacteria.o__Bifidobacteriales.f__Bifidobacteriaceae	OID30347	Melanotransferrin	P08582	MELTF	Cardiometabolic_II	MR-PRESSO	6	0.101216	0.0206877	0.00450339							rs10455532; rs12657170; rs182549; rs4851317; rs4859454; rs74452406		NA	YES
GCST90027662	k__Bacteria.p__Actinobacteria.c__Actinobacteria.o__Bifidobacteriales.f__Bifidobacteriaceae	OID30641	B-cell differentiation antigen CD72	P21854	CD72	Inflammation_II	Inverse variance weighted	6	-0.094662	0.0337934	0.00509135				2.62075	5	0.758211	rs10455532; rs12657170; rs182549; rs4851317; rs4859454; rs74452406		0.0470950019275574	YES
GCST90027662	k__Bacteria.p__Actinobacteria.c__Actinobacteria.o__Bifidobacteriales.f__Bifidobacteriaceae	OID30641	B-cell differentiation antigen CD72	P21854	CD72	Inflammation_II	MR Egger	6	-0.0590979	0.107752	0.612548	-0.0040521	0.0116576	0.745666	2.49993	4	0.644649	rs10455532; rs12657170; rs182549; rs4851317; rs4859454; rs74452406		NA	YES
GCST90027662	k__Bacteria.p__Actinobacteria.c__Actinobacteria.o__Bifidobacteriales.f__Bifidobacteriaceae	OID30641	B-cell differentiation antigen CD72	P21854	CD72	Inflammation_II	Weighted median	6	-0.115735	0.0433268	0.00755813							rs10455532; rs12657170; rs182549; rs4851317; rs4859454; rs74452406		NA	YES
GCST90027662	k__Bacteria.p__Actinobacteria.c__Actinobacteria.o__Bifidobacteriales.f__Bifidobacteriaceae	OID30641	B-cell differentiation antigen CD72	P21854	CD72	Inflammation_II	MR-PRESSO	6	-0.094662	0.0244658	0.0117703							rs10455532; rs12657170; rs182549; rs4851317; rs4859454; rs74452406		NA	YES
GCST90027688	k__Bacteria.p__Actinobacteria.c__Actinobacteria.o__Bifidobacteriales.f__Bifidobacteriaceae.g__Bifidobacterium	OID20548	Carcinoembryonic antigen-related cell adhesion molecule 21	Q3KPI0	CEACAM21	Inflammation	Inverse variance weighted	6	-0.0738891	0.0223041	0.000923654				1.56645	5	0.905277	rs10455532; rs12657170; rs182549; rs4472164; rs4859454; rs74452406		0.0179217468765496	YES
GCST90027688	k__Bacteria.p__Actinobacteria.c__Actinobacteria.o__Bifidobacteriales.f__Bifidobacteriaceae.g__Bifidobacterium	OID20548	Carcinoembryonic antigen-related cell adhesion molecule 21	Q3KPI0	CEACAM21	Inflammation	MR Egger	6	-0.104125	0.0726086	0.224861	0.0035879	0.00819941	0.684281	1.37497	4	0.848533	rs10455532; rs12657170; rs182549; rs4472164; rs4859454; rs74452406		NA	YES
GCST90027688	k__Bacteria.p__Actinobacteria.c__Actinobacteria.o__Bifidobacteriales.f__Bifidobacteriaceae.g__Bifidobacterium	OID20548	Carcinoembryonic antigen-related cell adhesion molecule 21	Q3KPI0	CEACAM21	Inflammation	Weighted median	6	-0.0756131	0.0282789	0.00749888							rs10455532; rs12657170; rs182549; rs4472164; rs4859454; rs74452406		NA	YES
GCST90027688	k__Bacteria.p__Actinobacteria.c__Actinobacteria.o__Bifidobacteriales.f__Bifidobacteriaceae.g__Bifidobacterium	OID20548	Carcinoembryonic antigen-related cell adhesion molecule 21	Q3KPI0	CEACAM21	Inflammation	MR-PRESSO	6	-0.0738891	0.0124841	0.00196226							rs10455532; rs12657170; rs182549; rs4472164; rs4859454; rs74452406		NA	YES
GCST90027688	k__Bacteria.p__Actinobacteria.c__Actinobacteria.o__Bifidobacteriales.f__Bifidobacteriaceae.g__Bifidobacterium	OID20776	Osteoclast-associated immunoglobulin-like receptor	Q8IYS5	OSCAR	Inflammation	Inverse variance weighted	6	-0.0912237	0.0296359	0.00208289				3.08717	5	0.686548	rs10455532; rs12657170; rs182549; rs4472164; rs4859454; rs74452406		0.0250387150691934	YES
GCST90027688	k__Bacteria.p__Actinobacteria.c__Actinobacteria.o__Bifidobacteriales.f__Bifidobacteriaceae.g__Bifidobacterium	OID20776	Osteoclast-associated immunoglobulin-like receptor	Q8IYS5	OSCAR	Inflammation	MR Egger	6	-0.0618484	0.0965141	0.556508	-0.00348694	0.0109031	0.765118	2.98489	4	0.560357	rs10455532; rs12657170; rs182549; rs4472164; rs4859454; rs74452406		NA	YES
GCST90027688	k__Bacteria.p__Actinobacteria.c__Actinobacteria.o__Bifidobacteriales.f__Bifidobacteriaceae.g__Bifidobacterium	OID20776	Osteoclast-associated immunoglobulin-like receptor	Q8IYS5	OSCAR	Inflammation	Weighted median	6	-0.0913031	0.0373636	0.01454							rs10455532; rs12657170; rs182549; rs4472164; rs4859454; rs74452406		NA	YES
GCST90027688	k__Bacteria.p__Actinobacteria.c__Actinobacteria.o__Bifidobacteriales.f__Bifidobacteriaceae.g__Bifidobacterium	OID20776	Osteoclast-associated immunoglobulin-like receptor	Q8IYS5	OSCAR	Inflammation	MR-PRESSO	6	-0.0912237	0.023287	0.0112116							rs10455532; rs12657170; rs182549; rs4472164; rs4859454; rs74452406		NA	YES
GCST90027688	k__Bacteria.p__Actinobacteria.c__Actinobacteria.o__Bifidobacteriales.f__Bifidobacteriaceae.g__Bifidobacterium	OID30448	T-cell surface glycoprotein CD3 gamma chain	P09693	CD3G	Inflammation_II	Inverse variance weighted	6	-0.107951	0.0355744	0.00240918				1.2322	5	0.941751	rs10455532; rs12657170; rs182549; rs4472164; rs4859454; rs74452406		0.0445698574341704	YES
GCST90027688	k__Bacteria.p__Actinobacteria.c__Actinobacteria.o__Bifidobacteriales.f__Bifidobacteriaceae.g__Bifidobacterium	OID30448	T-cell surface glycoprotein CD3 gamma chain	P09693	CD3G	Inflammation_II	MR Egger	6	-0.215408	0.115796	0.136362	0.0127516	0.0130765	0.384703	0.281288	4	0.99099	rs10455532; rs12657170; rs182549; rs4472164; rs4859454; rs74452406		NA	YES
GCST90027688	k__Bacteria.p__Actinobacteria.c__Actinobacteria.o__Bifidobacteriales.f__Bifidobacteriaceae.g__Bifidobacterium	OID30448	T-cell surface glycoprotein CD3 gamma chain	P09693	CD3G	Inflammation_II	Weighted median	6	-0.118943	0.0442532	0.00719263							rs10455532; rs12657170; rs182549; rs4472164; rs4859454; rs74452406		NA	YES
GCST90027688	k__Bacteria.p__Actinobacteria.c__Actinobacteria.o__Bifidobacteriales.f__Bifidobacteriaceae.g__Bifidobacterium	OID30448	T-cell surface glycoprotein CD3 gamma chain	P09693	CD3G	Inflammation_II	MR-PRESSO	6	-0.107951	0.0176601	0.00169834							rs10455532; rs12657170; rs182549; rs4472164; rs4859454; rs74452406		NA	YES
GCST90027754	k__Bacteria.p__Actinobacteria.c__Actinobacteria.o__Bifidobacteriales.f__Bifidobacteriaceae.g__Bifidobacterium.s__Bifidobacterium_adolescentis	OID20105	Angiotensin-converting enzyme 2	Q9BYF1	ACE2	Cardiometabolic	Inverse variance weighted	8	-0.101109	0.02567	8.18884e-05				2.49216	7	0.927686	rs11986537; rs4110696; rs4256405; rs4351047; rs4646215; rs6754311; rs74394156; rs8045380		0.00302987014902296	YES
GCST90027754	k__Bacteria.p__Actinobacteria.c__Actinobacteria.o__Bifidobacteriales.f__Bifidobacteriaceae.g__Bifidobacterium.s__Bifidobacterium_adolescentis	OID20105	Angiotensin-converting enzyme 2	Q9BYF1	ACE2	Cardiometabolic	MR Egger	8	-0.142777	0.0990136	0.199393	0.00479669	0.0110083	0.67827	2.3023	6	0.889905	rs11986537; rs4110696; rs4256405; rs4351047; rs4646215; rs6754311; rs74394156; rs8045380		NA	YES
GCST90027754	k__Bacteria.p__Actinobacteria.c__Actinobacteria.o__Bifidobacteriales.f__Bifidobacteriaceae.g__Bifidobacterium.s__Bifidobacterium_adolescentis	OID20105	Angiotensin-converting enzyme 2	Q9BYF1	ACE2	Cardiometabolic	Weighted median	8	-0.110251	0.0344387	0.00136772							rs11986537; rs4110696; rs4256405; rs4351047; rs4646215; rs6754311; rs74394156; rs8045380		NA	YES
GCST90027754	k__Bacteria.p__Actinobacteria.c__Actinobacteria.o__Bifidobacteriales.f__Bifidobacteriaceae.g__Bifidobacterium.s__Bifidobacterium_adolescentis	OID20105	Angiotensin-converting enzyme 2	Q9BYF1	ACE2	Cardiometabolic	MR-PRESSO	8	-0.101109	0.0153167	0.000303955							rs11986537; rs4110696; rs4256405; rs4351047; rs4646215; rs6754311; rs74394156; rs8045380		NA	YES
GCST90027754	k__Bacteria.p__Actinobacteria.c__Actinobacteria.o__Bifidobacteriales.f__Bifidobacteriaceae.g__Bifidobacterium.s__Bifidobacterium_adolescentis	OID20210	Macrophage receptor MARCO	Q9UEW3	MARCO	Cardiometabolic	Inverse variance weighted	8	-0.0952739	0.0279899	0.000664395				7.38375	7	0.390046	rs11986537; rs4110696; rs4256405; rs4351047; rs4646215; rs6754311; rs74394156; rs8045380		0.00819420422290675	YES
GCST90027754	k__Bacteria.p__Actinobacteria.c__Actinobacteria.o__Bifidobacteriales.f__Bifidobacteriaceae.g__Bifidobacterium.s__Bifidobacterium_adolescentis	OID20210	Macrophage receptor MARCO	Q9UEW3	MARCO	Cardiometabolic	MR Egger	8	-0.0795408	0.116702	0.520936	-0.00180644	0.0129435	0.893572	7.35986	6	0.288845	rs11986537; rs4110696; rs4256405; rs4351047; rs4646215; rs6754311; rs74394156; rs8045380		NA	YES
GCST90027754	k__Bacteria.p__Actinobacteria.c__Actinobacteria.o__Bifidobacteriales.f__Bifidobacteriaceae.g__Bifidobacterium.s__Bifidobacterium_adolescentis	OID20210	Macrophage receptor MARCO	Q9UEW3	MARCO	Cardiometabolic	Weighted median	8	-0.0829355	0.0404886	0.0405242							rs11986537; rs4110696; rs4256405; rs4351047; rs4646215; rs6754311; rs74394156; rs8045380		NA	YES
GCST90027754	k__Bacteria.p__Actinobacteria.c__Actinobacteria.o__Bifidobacteriales.f__Bifidobacteriaceae.g__Bifidobacterium.s__Bifidobacterium_adolescentis	OID20210	Macrophage receptor MARCO	Q9UEW3	MARCO	Cardiometabolic	MR-PRESSO	8	-0.0952739	0.0279899	0.0113824							rs11986537; rs4110696; rs4256405; rs4351047; rs4646215; rs6754311; rs74394156; rs8045380		NA	YES
GCST90027754	k__Bacteria.p__Actinobacteria.c__Actinobacteria.o__Bifidobacteriales.f__Bifidobacteriaceae.g__Bifidobacterium.s__Bifidobacterium_adolescentis	OID20675	C-X-C motif chemokine 9	Q07325	CXCL9	Inflammation	Inverse variance weighted	8	-0.109965	0.0260985	2.51483e-05				6.75412	7	0.454922	rs11986537; rs4110696; rs4256405; rs4351047; rs4646215; rs6754311; rs74394156; rs8045380		0.000930486589947619	YES
GCST90027754	k__Bacteria.p__Actinobacteria.c__Actinobacteria.o__Bifidobacteriales.f__Bifidobacteriaceae.g__Bifidobacterium.s__Bifidobacterium_adolescentis	OID20675	C-X-C motif chemokine 9	Q07325	CXCL9	Inflammation	MR Egger	8	-0.118243	0.106681	0.310139	0.000953306	0.0118656	0.938578	6.74686	6	0.344893	rs11986537; rs4110696; rs4256405; rs4351047; rs4646215; rs6754311; rs74394156; rs8045380		NA	YES
GCST90027754	k__Bacteria.p__Actinobacteria.c__Actinobacteria.o__Bifidobacteriales.f__Bifidobacteriaceae.g__Bifidobacterium.s__Bifidobacterium_adolescentis	OID20675	C-X-C motif chemokine 9	Q07325	CXCL9	Inflammation	Weighted median	8	-0.113622	0.0379838	0.00277767							rs11986537; rs4110696; rs4256405; rs4351047; rs4646215; rs6754311; rs74394156; rs8045380		NA	YES
GCST90027754	k__Bacteria.p__Actinobacteria.c__Actinobacteria.o__Bifidobacteriales.f__Bifidobacteriaceae.g__Bifidobacterium.s__Bifidobacterium_adolescentis	OID20675	C-X-C motif chemokine 9	Q07325	CXCL9	Inflammation	MR-PRESSO	8	-0.109965	0.025636	0.00361302							rs11986537; rs4110696; rs4256405; rs4351047; rs4646215; rs6754311; rs74394156; rs8045380		NA	YES
GCST90027754	k__Bacteria.p__Actinobacteria.c__Actinobacteria.o__Bifidobacteriales.f__Bifidobacteriaceae.g__Bifidobacterium.s__Bifidobacterium_adolescentis	OID20697	C-X-C motif chemokine 10	P02778	CXCL10	Inflammation	Inverse variance weighted	8	-0.0823632	0.0272235	0.00248265				5.5901	7	0.58834	rs11986537; rs4110696; rs4256405; rs4351047; rs4646215; rs6754311; rs74394156; rs8045380		0.0306193473521374	YES
GCST90027754	k__Bacteria.p__Actinobacteria.c__Actinobacteria.o__Bifidobacteriales.f__Bifidobacteriaceae.g__Bifidobacterium.s__Bifidobacterium_adolescentis	OID20697	C-X-C motif chemokine 10	P02778	CXCL10	Inflammation	MR Egger	8	-0.108374	0.104938	0.341543	0.00299546	0.0116711	0.806018	5.52422	6	0.478534	rs11986537; rs4110696; rs4256405; rs4351047; rs4646215; rs6754311; rs74394156; rs8045380		NA	YES
GCST90027754	k__Bacteria.p__Actinobacteria.c__Actinobacteria.o__Bifidobacteriales.f__Bifidobacteriaceae.g__Bifidobacterium.s__Bifidobacterium_adolescentis	OID20697	C-X-C motif chemokine 10	P02778	CXCL10	Inflammation	Weighted median	8	-0.100801	0.0377532	0.00758493							rs11986537; rs4110696; rs4256405; rs4351047; rs4646215; rs6754311; rs74394156; rs8045380		NA	YES
GCST90027754	k__Bacteria.p__Actinobacteria.c__Actinobacteria.o__Bifidobacteriales.f__Bifidobacteriaceae.g__Bifidobacterium.s__Bifidobacterium_adolescentis	OID20697	C-X-C motif chemokine 10	P02778	CXCL10	Inflammation	MR-PRESSO	8	-0.0823632	0.0243279	0.01167							rs11986537; rs4110696; rs4256405; rs4351047; rs4646215; rs6754311; rs74394156; rs8045380		NA	YES
GCST90027757	k__Bacteria.p__Actinobacteria.c__Actinobacteria.o__Bifidobacteriales.f__Bifidobacteriaceae.g__Bifidobacterium.s__Bifidobacterium_longum	OID20477	Interleukin-17C	Q9P0M4	IL17C	Inflammation	Inverse variance weighted	6	0.115807	0.0343936	0.000759564				2.23408	5	0.815899	rs10033190; rs13391731; rs1446585; rs6780177; rs73412051; rs7761703		0.0281038784020307	YES
GCST90027757	k__Bacteria.p__Actinobacteria.c__Actinobacteria.o__Bifidobacteriales.f__Bifidobacteriaceae.g__Bifidobacterium.s__Bifidobacterium_longum	OID20477	Interleukin-17C	Q9P0M4	IL17C	Inflammation	MR Egger	6	0.134621	0.161834	0.452273	-0.00226833	0.0190665	0.911035	2.21992	4	0.695383	rs10033190; rs13391731; rs1446585; rs6780177; rs73412051; rs7761703		NA	YES
GCST90027757	k__Bacteria.p__Actinobacteria.c__Actinobacteria.o__Bifidobacteriales.f__Bifidobacteriaceae.g__Bifidobacterium.s__Bifidobacterium_longum	OID20477	Interleukin-17C	Q9P0M4	IL17C	Inflammation	Weighted median	6	0.101401	0.0450081	0.0242627							rs10033190; rs13391731; rs1446585; rs6780177; rs73412051; rs7761703		NA	YES
GCST90027757	k__Bacteria.p__Actinobacteria.c__Actinobacteria.o__Bifidobacteriales.f__Bifidobacteriaceae.g__Bifidobacterium.s__Bifidobacterium_longum	OID20477	Interleukin-17C	Q9P0M4	IL17C	Inflammation	MR-PRESSO	6	0.115807	0.0229901	0.00397613							rs10033190; rs13391731; rs1446585; rs6780177; rs73412051; rs7761703		NA	YES
GCST90027757	k__Bacteria.p__Actinobacteria.c__Actinobacteria.o__Bifidobacteriales.f__Bifidobacteriaceae.g__Bifidobacterium.s__Bifidobacterium_longum	OID20483	Thioredoxin-dependent peroxide reductase, mitochondrial	P30048	PRDX3	Inflammation	Inverse variance weighted	6	0.115202	0.0350468	0.00101229				4.61766	5	0.464296	rs10033190; rs13391731; rs1446585; rs6780177; rs73412051; rs7761703		0.0374548795045909	YES
GCST90027757	k__Bacteria.p__Actinobacteria.c__Actinobacteria.o__Bifidobacteriales.f__Bifidobacteriaceae.g__Bifidobacterium.s__Bifidobacterium_longum	OID20483	Thioredoxin-dependent peroxide reductase, mitochondrial	P30048	PRDX3	Inflammation	MR Egger	6	-0.123908	0.164898	0.494191	0.0288323	0.0194294	0.211982	2.41554	4	0.65982	rs10033190; rs13391731; rs1446585; rs6780177; rs73412051; rs7761703		NA	YES
GCST90027757	k__Bacteria.p__Actinobacteria.c__Actinobacteria.o__Bifidobacteriales.f__Bifidobacteriaceae.g__Bifidobacterium.s__Bifidobacterium_longum	OID20483	Thioredoxin-dependent peroxide reductase, mitochondrial	P30048	PRDX3	Inflammation	Weighted median	6	0.0964237	0.0473441	0.0416844							rs10033190; rs13391731; rs1446585; rs6780177; rs73412051; rs7761703		NA	YES
GCST90027757	k__Bacteria.p__Actinobacteria.c__Actinobacteria.o__Bifidobacteriales.f__Bifidobacteriaceae.g__Bifidobacterium.s__Bifidobacterium_longum	OID20483	Thioredoxin-dependent peroxide reductase, mitochondrial	P30048	PRDX3	Inflammation	MR-PRESSO	6	0.115202	0.0336802	0.0188287							rs10033190; rs13391731; rs1446585; rs6780177; rs73412051; rs7761703		NA	YES
GCST90027757	k__Bacteria.p__Actinobacteria.c__Actinobacteria.o__Bifidobacteriales.f__Bifidobacteriaceae.g__Bifidobacterium.s__Bifidobacterium_longum	OID20579	2,4-dienoyl-CoA reductase, mitochondrial	Q16698	DECR1	Inflammation	Inverse variance weighted	6	0.115897	0.0346201	0.000814904				2.73957	5	0.740059	rs10033190; rs13391731; rs1446585; rs6780177; rs73412051; rs7761703		0.0301514564689828	YES
GCST90027757	k__Bacteria.p__Actinobacteria.c__Actinobacteria.o__Bifidobacteriales.f__Bifidobacteriaceae.g__Bifidobacterium.s__Bifidobacterium_longum	OID20579	2,4-dienoyl-CoA reductase, mitochondrial	Q16698	DECR1	Inflammation	MR Egger	6	-0.0513036	0.162963	0.768639	0.0201596	0.0192002	0.35298	1.63714	4	0.802102	rs10033190; rs13391731; rs1446585; rs6780177; rs73412051; rs7761703		NA	YES
GCST90027757	k__Bacteria.p__Actinobacteria.c__Actinobacteria.o__Bifidobacteriales.f__Bifidobacteriaceae.g__Bifidobacterium.s__Bifidobacterium_longum	OID20579	2,4-dienoyl-CoA reductase, mitochondrial	Q16698	DECR1	Inflammation	Weighted median	6	0.0882935	0.0439014	0.0443065							rs10033190; rs13391731; rs1446585; rs6780177; rs73412051; rs7761703		NA	YES
GCST90027757	k__Bacteria.p__Actinobacteria.c__Actinobacteria.o__Bifidobacteriales.f__Bifidobacteriaceae.g__Bifidobacterium.s__Bifidobacterium_longum	OID20579	2,4-dienoyl-CoA reductase, mitochondrial	Q16698	DECR1	Inflammation	MR-PRESSO	6	0.115897	0.0256263	0.00626793							rs10033190; rs13391731; rs1446585; rs6780177; rs73412051; rs7761703		NA	YES
GCST90027757	k__Bacteria.p__Actinobacteria.c__Actinobacteria.o__Bifidobacteriales.f__Bifidobacteriaceae.g__Bifidobacterium.s__Bifidobacterium_longum	OID20586	Lymphotoxin-alpha	P01374	LTA	Inflammation	Inverse variance weighted	6	-0.0872413	0.0295719	0.00317629				4.72148	5	0.450807	rs10033190; rs13391731; rs1446585; rs6780177; rs73412051; rs7761703		0.0418394999025353	YES
GCST90027757	k__Bacteria.p__Actinobacteria.c__Actinobacteria.o__Bifidobacteriales.f__Bifidobacteriaceae.g__Bifidobacterium.s__Bifidobacterium_longum	OID20586	Lymphotoxin-alpha	P01374	LTA	Inflammation	MR Egger	6	-0.153545	0.151353	0.367727	0.00784158	0.0175118	0.677488	4.4961	4	0.34301	rs10033190; rs13391731; rs1446585; rs6780177; rs73412051; rs7761703		NA	YES
GCST90027757	k__Bacteria.p__Actinobacteria.c__Actinobacteria.o__Bifidobacteriales.f__Bifidobacteriaceae.g__Bifidobacterium.s__Bifidobacterium_longum	OID20586	Lymphotoxin-alpha	P01374	LTA	Inflammation	Weighted median	6	-0.108439	0.0386912	0.00506822							rs10033190; rs13391731; rs1446585; rs6780177; rs73412051; rs7761703		NA	YES
GCST90027757	k__Bacteria.p__Actinobacteria.c__Actinobacteria.o__Bifidobacteriales.f__Bifidobacteriaceae.g__Bifidobacterium.s__Bifidobacterium_longum	OID20586	Lymphotoxin-alpha	P01374	LTA	Inflammation	MR-PRESSO	6	-0.0872413	0.0287365	0.0288856							rs10033190; rs13391731; rs1446585; rs6780177; rs73412051; rs7761703		NA	YES
GCST90027757	k__Bacteria.p__Actinobacteria.c__Actinobacteria.o__Bifidobacteriales.f__Bifidobacteriaceae.g__Bifidobacterium.s__Bifidobacterium_longum	OID20641	GMP reductase 1	P36959	GMPR	Inflammation	Inverse variance weighted	6	0.106985	0.0331983	0.00127038				2.5765	5	0.764932	rs10033190; rs13391731; rs1446585; rs6780177; rs73412051; rs7761703		0.0470039731160284	YES
GCST90027757	k__Bacteria.p__Actinobacteria.c__Actinobacteria.o__Bifidobacteriales.f__Bifidobacteriaceae.g__Bifidobacterium.s__Bifidobacterium_longum	OID20641	GMP reductase 1	P36959	GMPR	Inflammation	MR Egger	6	0.129324	0.156533	0.455134	-0.00268927	0.0184152	0.890958	2.55517	4	0.634784	rs10033190; rs13391731; rs1446585; rs6780177; rs73412051; rs7761703		NA	YES
GCST90027757	k__Bacteria.p__Actinobacteria.c__Actinobacteria.o__Bifidobacteriales.f__Bifidobacteriaceae.g__Bifidobacterium.s__Bifidobacterium_longum	OID20641	GMP reductase 1	P36959	GMPR	Inflammation	Weighted median	6	0.108708	0.0454413	0.0167446							rs10033190; rs13391731; rs1446585; rs6780177; rs73412051; rs7761703		NA	YES
GCST90027757	k__Bacteria.p__Actinobacteria.c__Actinobacteria.o__Bifidobacteriales.f__Bifidobacteriaceae.g__Bifidobacterium.s__Bifidobacterium_longum	OID20641	GMP reductase 1	P36959	GMPR	Inflammation	MR-PRESSO	6	0.106985	0.0238312	0.00646322							rs10033190; rs13391731; rs1446585; rs6780177; rs73412051; rs7761703		NA	YES
GCST90027757	k__Bacteria.p__Actinobacteria.c__Actinobacteria.o__Bifidobacteriales.f__Bifidobacteriaceae.g__Bifidobacterium.s__Bifidobacterium_longum	OID30219	Lon protease homolog, mitochondrial	P36776	LONP1	Cardiometabolic_II	Inverse variance weighted	6	0.122903	0.0347491	0.000404887				4.01811	5	0.546812	rs10033190; rs13391731; rs1446585; rs6780177; rs73412051; rs7761703		0.014980817877079	YES
GCST90027757	k__Bacteria.p__Actinobacteria.c__Actinobacteria.o__Bifidobacteriales.f__Bifidobacteriaceae.g__Bifidobacterium.s__Bifidobacterium_longum	OID30219	Lon protease homolog, mitochondrial	P36776	LONP1	Cardiometabolic_II	MR Egger	6	-0.104884	0.163589	0.556318	0.0274665	0.0192753	0.227293	1.9876	4	0.73804	rs10033190; rs13391731; rs1446585; rs6780177; rs73412051; rs7761703		NA	YES
GCST90027757	k__Bacteria.p__Actinobacteria.c__Actinobacteria.o__Bifidobacteriales.f__Bifidobacteriaceae.g__Bifidobacterium.s__Bifidobacterium_longum	OID30219	Lon protease homolog, mitochondrial	P36776	LONP1	Cardiometabolic_II	Weighted median	6	0.0980148	0.0468068	0.0362574							rs10033190; rs13391731; rs1446585; rs6780177; rs73412051; rs7761703		NA	YES
GCST90027757	k__Bacteria.p__Actinobacteria.c__Actinobacteria.o__Bifidobacteriales.f__Bifidobacteriaceae.g__Bifidobacterium.s__Bifidobacterium_longum	OID30219	Lon protease homolog, mitochondrial	P36776	LONP1	Cardiometabolic_II	MR-PRESSO	6	0.122903	0.0311508	0.0109005							rs10033190; rs13391731; rs1446585; rs6780177; rs73412051; rs7761703		NA	YES
GCST90027757	k__Bacteria.p__Actinobacteria.c__Actinobacteria.o__Bifidobacteriales.f__Bifidobacteriaceae.g__Bifidobacterium.s__Bifidobacterium_longum	OID30488	Aflatoxin B1 aldehyde reductase member 4	Q8NHP1	AKR7L	Inflammation_II	Inverse variance weighted	6	0.117666	0.0345923	0.000670164				4.18196	5	0.523526	rs10033190; rs13391731; rs1446585; rs6780177; rs73412051; rs7761703		0.0247960776453152	YES
GCST90027757	k__Bacteria.p__Actinobacteria.c__Actinobacteria.o__Bifidobacteriales.f__Bifidobacteriaceae.g__Bifidobacterium.s__Bifidobacterium_longum	OID30488	Aflatoxin B1 aldehyde reductase member 4	Q8NHP1	AKR7L	Inflammation_II	MR Egger	6	0.435413	0.162818	0.0555609	-0.0383081	0.0191814	0.116496	0.193383	4	0.995616	rs10033190; rs13391731; rs1446585; rs6780177; rs73412051; rs7761703		NA	YES
GCST90027757	k__Bacteria.p__Actinobacteria.c__Actinobacteria.o__Bifidobacteriales.f__Bifidobacteriaceae.g__Bifidobacterium.s__Bifidobacterium_longum	OID30488	Aflatoxin B1 aldehyde reductase member 4	Q8NHP1	AKR7L	Inflammation_II	Weighted median	6	0.14002	0.0461559	0.00241629							rs10033190; rs13391731; rs1446585; rs6780177; rs73412051; rs7761703		NA	YES
GCST90027757	k__Bacteria.p__Actinobacteria.c__Actinobacteria.o__Bifidobacteriales.f__Bifidobacteriaceae.g__Bifidobacterium.s__Bifidobacterium_longum	OID30488	Aflatoxin B1 aldehyde reductase member 4	Q8NHP1	AKR7L	Inflammation_II	MR-PRESSO	6	0.117666	0.0316362	0.0137215							rs10033190; rs13391731; rs1446585; rs6780177; rs73412051; rs7761703		NA	YES
GCST90027757	k__Bacteria.p__Actinobacteria.c__Actinobacteria.o__Bifidobacteriales.f__Bifidobacteriaceae.g__Bifidobacterium.s__Bifidobacterium_longum	OID30669	Malate dehydrogenase, cytoplasmic	P40925	MDH1	Inflammation_II	Inverse variance weighted	6	0.11566	0.034018	0.000673949				2.6291	5	0.756939	rs10033190; rs13391731; rs1446585; rs6780177; rs73412051; rs7761703		0.0249361025167082	YES
GCST90027757	k__Bacteria.p__Actinobacteria.c__Actinobacteria.o__Bifidobacteriales.f__Bifidobacteriaceae.g__Bifidobacterium.s__Bifidobacterium_longum	OID30669	Malate dehydrogenase, cytoplasmic	P40925	MDH1	Inflammation_II	MR Egger	6	-0.023477	0.160153	0.890546	0.0167757	0.018869	0.424206	1.83867	4	0.765401	rs10033190; rs13391731; rs1446585; rs6780177; rs73412051; rs7761703		NA	YES
GCST90027757	k__Bacteria.p__Actinobacteria.c__Actinobacteria.o__Bifidobacteriales.f__Bifidobacteriaceae.g__Bifidobacterium.s__Bifidobacterium_longum	OID30669	Malate dehydrogenase, cytoplasmic	P40925	MDH1	Inflammation_II	Weighted median	6	0.102254	0.0462773	0.0271333							rs10033190; rs13391731; rs1446585; rs6780177; rs73412051; rs7761703		NA	YES
GCST90027757	k__Bacteria.p__Actinobacteria.c__Actinobacteria.o__Bifidobacteriales.f__Bifidobacteriaceae.g__Bifidobacterium.s__Bifidobacterium_longum	OID30669	Malate dehydrogenase, cytoplasmic	P40925	MDH1	Inflammation_II	MR-PRESSO	6	0.11566	0.0246676	0.0053912							rs10033190; rs13391731; rs1446585; rs6780177; rs73412051; rs7761703		NA	YES
GCST90027737	k__Bacteria.p__Actinobacteria.c__Actinobacteria.o__Coriobacteriales	OID20133	Platelet-derived growth factor receptor alpha	P16234	PDGFRA	Cardiometabolic	Inverse variance weighted	6	-0.145284	0.0481671	0.00255918				8.49154	5	0.131146	rs11652058; rs28806584; rs2907732; rs4234207; rs550057; rs78362376		0.0473447408013067	YES
GCST90027737	k__Bacteria.p__Actinobacteria.c__Actinobacteria.o__Coriobacteriales	OID20133	Platelet-derived growth factor receptor alpha	P16234	PDGFRA	Cardiometabolic	MR Egger	6	-0.402312	0.314126	0.269505	0.0253726	0.0306176	0.453863	7.24731	4	0.123382	rs11652058; rs28806584; rs2907732; rs4234207; rs550057; rs78362376		NA	YES
GCST90027737	k__Bacteria.p__Actinobacteria.c__Actinobacteria.o__Coriobacteriales	OID20133	Platelet-derived growth factor receptor alpha	P16234	PDGFRA	Cardiometabolic	Weighted median	6	-0.114391	0.0507383	0.0241629							rs11652058; rs28806584; rs2907732; rs4234207; rs550057; rs78362376		NA	YES
GCST90027737	k__Bacteria.p__Actinobacteria.c__Actinobacteria.o__Coriobacteriales	OID20133	Platelet-derived growth factor receptor alpha	P16234	PDGFRA	Cardiometabolic	MR-PRESSO	6	-0.145284	0.0481671	0.0295429							rs11652058; rs28806584; rs2907732; rs4234207; rs550057; rs78362376		NA	YES
GCST90027737	k__Bacteria.p__Actinobacteria.c__Actinobacteria.o__Coriobacteriales	OID30775	CD5 antigen-like	O43866	CD5L	Inflammation_II	Inverse variance weighted	6	-0.119353	0.0375107	0.00146339				2.22118	5	0.817772	rs11652058; rs28806584; rs2907732; rs4234207; rs550057; rs78362376		0.0270727839334363	YES
GCST90027737	k__Bacteria.p__Actinobacteria.c__Actinobacteria.o__Coriobacteriales	OID30775	CD5 antigen-like	O43866	CD5L	Inflammation_II	MR Egger	6	-0.257266	0.23678	0.338343	0.0136132	0.0230772	0.58697	1.87319	4	0.759067	rs11652058; rs28806584; rs2907732; rs4234207; rs550057; rs78362376		NA	YES
GCST90027737	k__Bacteria.p__Actinobacteria.c__Actinobacteria.o__Coriobacteriales	OID30775	CD5 antigen-like	O43866	CD5L	Inflammation_II	Weighted median	6	-0.109781	0.0466808	0.0186856							rs11652058; rs28806584; rs2907732; rs4234207; rs550057; rs78362376		NA	YES
GCST90027737	k__Bacteria.p__Actinobacteria.c__Actinobacteria.o__Coriobacteriales	OID30775	CD5 antigen-like	O43866	CD5L	Inflammation_II	MR-PRESSO	6	-0.119353	0.0250013	0.00499755							rs11652058; rs28806584; rs2907732; rs4234207; rs550057; rs78362376		NA	YES
GCST90027663	k__Bacteria.p__Actinobacteria.c__Actinobacteria.o__Coriobacteriales.f__Coriobacteriaceae	OID20133	Platelet-derived growth factor receptor alpha	P16234	PDGFRA	Cardiometabolic	Inverse variance weighted	6	-0.145304	0.0481611	0.00255266				8.48873	5	0.131278	rs11652058; rs28806584; rs2907732; rs4234207; rs550057; rs78362376		0.0473447408013067	YES
GCST90027663	k__Bacteria.p__Actinobacteria.c__Actinobacteria.o__Coriobacteriales.f__Coriobacteriaceae	OID20133	Platelet-derived growth factor receptor alpha	P16234	PDGFRA	Cardiometabolic	MR Egger	6	-0.402421	0.313821	0.268999	0.0253808	0.0305867	0.453303	7.24207	4	0.123636	rs11652058; rs28806584; rs2907732; rs4234207; rs550057; rs78362376		NA	YES
GCST90027663	k__Bacteria.p__Actinobacteria.c__Actinobacteria.o__Coriobacteriales.f__Coriobacteriaceae	OID20133	Platelet-derived growth factor receptor alpha	P16234	PDGFRA	Cardiometabolic	Weighted median	6	-0.114455	0.0508767	0.0244707							rs11652058; rs28806584; rs2907732; rs4234207; rs550057; rs78362376		NA	YES
GCST90027663	k__Bacteria.p__Actinobacteria.c__Actinobacteria.o__Coriobacteriales.f__Coriobacteriaceae	OID20133	Platelet-derived growth factor receptor alpha	P16234	PDGFRA	Cardiometabolic	MR-PRESSO	6	-0.145304	0.0481611	0.0295167							rs11652058; rs28806584; rs2907732; rs4234207; rs550057; rs78362376		NA	YES
GCST90027663	k__Bacteria.p__Actinobacteria.c__Actinobacteria.o__Coriobacteriales.f__Coriobacteriaceae	OID30775	CD5 antigen-like	O43866	CD5L	Inflammation_II	Inverse variance weighted	6	-0.119364	0.0375123	0.00146264				2.22023	5	0.817908	rs11652058; rs28806584; rs2907732; rs4234207; rs550057; rs78362376		0.0270727839334363	YES
GCST90027663	k__Bacteria.p__Actinobacteria.c__Actinobacteria.o__Coriobacteriales.f__Coriobacteriaceae	OID30775	CD5 antigen-like	O43866	CD5L	Inflammation_II	MR Egger	6	-0.257238	0.236635	0.338128	0.0136092	0.0230622	0.586843	1.872	4	0.759286	rs11652058; rs28806584; rs2907732; rs4234207; rs550057; rs78362376		NA	YES
GCST90027663	k__Bacteria.p__Actinobacteria.c__Actinobacteria.o__Coriobacteriales.f__Coriobacteriaceae	OID30775	CD5 antigen-like	O43866	CD5L	Inflammation_II	Weighted median	6	-0.109824	0.0460706	0.0171342							rs11652058; rs28806584; rs2907732; rs4234207; rs550057; rs78362376		NA	YES
GCST90027663	k__Bacteria.p__Actinobacteria.c__Actinobacteria.o__Coriobacteriales.f__Coriobacteriaceae	OID30775	CD5 antigen-like	O43866	CD5L	Inflammation_II	MR-PRESSO	6	-0.119364	0.024997	0.00499208							rs11652058; rs28806584; rs2907732; rs4234207; rs550057; rs78362376		NA	YES
GCST90027690	k__Bacteria.p__Actinobacteria.c__Actinobacteria.o__Coriobacteriales.f__Coriobacteriaceae.g__Collinsella	OID20190	Sialic acid-binding Ig-like lectin 7	Q9Y286	SIGLEC7	Cardiometabolic	Inverse variance weighted	4	-0.171283	0.0406587	2.52338e-05				2.22979	3	0.526104	rs11782083; rs550057; rs6099022; rs7831606		0.000933649830438809	YES
GCST90027690	k__Bacteria.p__Actinobacteria.c__Actinobacteria.o__Coriobacteriales.f__Coriobacteriaceae.g__Collinsella	OID20190	Sialic acid-binding Ig-like lectin 7	Q9Y286	SIGLEC7	Cardiometabolic	MR Egger	4	-0.777411	0.434614	0.215555	0.0667123	0.0476252	0.296276	0.267611	2	0.87476	rs11782083; rs550057; rs6099022; rs7831606		NA	YES
GCST90027690	k__Bacteria.p__Actinobacteria.c__Actinobacteria.o__Coriobacteriales.f__Coriobacteriaceae.g__Collinsella	OID20190	Sialic acid-binding Ig-like lectin 7	Q9Y286	SIGLEC7	Cardiometabolic	Weighted median	4	-0.154258	0.0525524	0.00333201							rs11782083; rs550057; rs6099022; rs7831606		NA	YES
GCST90027690	k__Bacteria.p__Actinobacteria.c__Actinobacteria.o__Coriobacteriales.f__Coriobacteriaceae.g__Collinsella	OID20190	Sialic acid-binding Ig-like lectin 7	Q9Y286	SIGLEC7	Cardiometabolic	MR-PRESSO	4	-0.171283	0.035053	0.0163913							rs11782083; rs550057; rs6099022; rs7831606		NA	YES
GCST90027690	k__Bacteria.p__Actinobacteria.c__Actinobacteria.o__Coriobacteriales.f__Coriobacteriaceae.g__Collinsella	OID20601	Interleukin-5 receptor subunit alpha	Q01344	IL5RA	Inflammation	Inverse variance weighted	4	-0.1264	0.0382952	0.000964501				1.52369	3	0.676815	rs11782083; rs550057; rs6099022; rs7831606		0.0178432617835514	YES
GCST90027690	k__Bacteria.p__Actinobacteria.c__Actinobacteria.o__Coriobacteriales.f__Coriobacteriaceae.g__Collinsella	OID20601	Interleukin-5 receptor subunit alpha	Q01344	IL5RA	Inflammation	MR Egger	4	-0.117435	0.409568	0.801294	-0.000986598	0.0448767	0.984456	1.5232	2	0.466918	rs11782083; rs550057; rs6099022; rs7831606		NA	YES
GCST90027690	k__Bacteria.p__Actinobacteria.c__Actinobacteria.o__Coriobacteriales.f__Coriobacteriaceae.g__Collinsella	OID20601	Interleukin-5 receptor subunit alpha	Q01344	IL5RA	Inflammation	Weighted median	4	-0.113138	0.0474409	0.0170873							rs11782083; rs550057; rs6099022; rs7831606		NA	YES
GCST90027690	k__Bacteria.p__Actinobacteria.c__Actinobacteria.o__Coriobacteriales.f__Coriobacteriaceae.g__Collinsella	OID20601	Interleukin-5 receptor subunit alpha	Q01344	IL5RA	Inflammation	MR-PRESSO	4	-0.1264	0.0272917	0.0189602							rs11782083; rs550057; rs6099022; rs7831606		NA	YES
GCST90027690	k__Bacteria.p__Actinobacteria.c__Actinobacteria.o__Coriobacteriales.f__Coriobacteriaceae.g__Collinsella	OID20719	Macrophage colony-stimulating factor 1	P09603	CSF1	Inflammation	Inverse variance weighted	4	-0.155264	0.0421988	0.000233837				2.22614	3	0.526817	rs11782083; rs550057; rs6099022; rs7831606		0.00865196336064456	YES
GCST90027690	k__Bacteria.p__Actinobacteria.c__Actinobacteria.o__Coriobacteriales.f__Coriobacteriaceae.g__Collinsella	OID20719	Macrophage colony-stimulating factor 1	P09603	CSF1	Inflammation	MR Egger	4	-0.708872	0.451279	0.25682	0.0609329	0.0494523	0.343092	0.707943	2	0.701895	rs11782083; rs550057; rs6099022; rs7831606		NA	YES
GCST90027690	k__Bacteria.p__Actinobacteria.c__Actinobacteria.o__Coriobacteriales.f__Coriobacteriaceae.g__Collinsella	OID20719	Macrophage colony-stimulating factor 1	P09603	CSF1	Inflammation	Weighted median	4	-0.146656	0.0561378	0.00899019							rs11782083; rs550057; rs6099022; rs7831606		NA	YES
GCST90027690	k__Bacteria.p__Actinobacteria.c__Actinobacteria.o__Coriobacteriales.f__Coriobacteriaceae.g__Collinsella	OID20719	Macrophage colony-stimulating factor 1	P09603	CSF1	Inflammation	MR-PRESSO	4	-0.155264	0.036351	0.023557							rs11782083; rs550057; rs6099022; rs7831606		NA	YES
GCST90027759	k__Bacteria.p__Actinobacteria.c__Actinobacteria.o__Coriobacteriales.f__Coriobacteriaceae.g__Collinsella.s__Collinsella_aerofaciens	OID20385	Interleukin-6 receptor subunit alpha	P08887	IL6R	Cardiometabolic	Inverse variance weighted	3	0.116711	0.0311308	0.000177505				0.501592	2	0.778181	rs386274; rs550057; rs72845940		0.00656768633481896	YES
GCST90027759	k__Bacteria.p__Actinobacteria.c__Actinobacteria.o__Coriobacteriales.f__Coriobacteriaceae.g__Collinsella.s__Collinsella_aerofaciens	OID20385	Interleukin-6 receptor subunit alpha	P08887	IL6R	Cardiometabolic	MR Egger	3	0.0198443	0.346802	0.963612	0.0106455	0.0379592	0.825934	0.422942	1	0.515473	rs386274; rs550057; rs72845940		NA	YES
GCST90027759	k__Bacteria.p__Actinobacteria.c__Actinobacteria.o__Coriobacteriales.f__Coriobacteriaceae.g__Collinsella.s__Collinsella_aerofaciens	OID20385	Interleukin-6 receptor subunit alpha	P08887	IL6R	Cardiometabolic	Weighted median	3	0.110389	0.04132	0.00754996							rs386274; rs550057; rs72845940		NA	YES
GCST90027701	k__Bacteria.p__Bacteroidetes.c__Bacteroidia.o__Bacteroidales.f__Rikenellaceae.g__Alistipes	OID30756	Tetranectin	P05452	CLEC3B	Inflammation_II	Inverse variance weighted	3	-0.16563	0.0543222	0.00229585				0.82501	2	0.66199	rs11211406; rs2465506; rs73344869		0.0425466882728777	YES
GCST90027701	k__Bacteria.p__Bacteroidetes.c__Bacteroidia.o__Bacteroidales.f__Rikenellaceae.g__Alistipes	OID30756	Tetranectin	P05452	CLEC3B	Inflammation_II	MR Egger	3	0.00947528	0.203119	0.970324	-0.0228298	0.0255176	0.535355	0.024573	1	0.875436	rs11211406; rs2465506; rs73344869		NA	YES
GCST90027701	k__Bacteria.p__Bacteroidetes.c__Bacteroidia.o__Bacteroidales.f__Rikenellaceae.g__Alistipes	OID30756	Tetranectin	P05452	CLEC3B	Inflammation_II	Weighted median	3	-0.134266	0.0678268	0.0477553							rs11211406; rs2465506; rs73344869		NA	YES
GCST90027656	k__Bacteria.p__Firmicutes.c__Negativicutes	OID30439	NAD-dependent protein deacetylase sirtuin-1	Q96EB6	SIRT1	Inflammation_II	MR Egger	5	0.0594113	0.172228	0.752895	-0.0229754	0.0204148	0.342318	0.326939	3	0.954885	rs12472147; rs12979658; rs2282037; rs77764206; rs78791321		NA	YES
GCST90027656	k__Bacteria.p__Firmicutes.c__Negativicutes	OID30439	NAD-dependent protein deacetylase sirtuin-1	Q96EB6	SIRT1	Inflammation_II	Weighted median	5	-0.131806	0.0520174	0.0112805							rs12472147; rs12979658; rs2282037; rs77764206; rs78791321		NA	YES
GCST90027656	k__Bacteria.p__Firmicutes.c__Negativicutes	OID30439	NAD-dependent protein deacetylase sirtuin-1	Q96EB6	SIRT1	Inflammation_II	MR-PRESSO	5	-0.12901	0.0254992	0.00718366							rs12472147; rs12979658; rs2282037; rs77764206; rs78791321		NA	YES
GCST90027656	k__Bacteria.p__Firmicutes.c__Negativicutes	OID20248	Intercellular adhesion molecule 2	P13598	ICAM2	Cardiometabolic	Inverse variance weighted	5	0.0975313	0.0292977	0.000871661				1.51531	4	0.823925	rs12472147; rs12979658; rs2282037; rs77764206; rs78791321		0.0161259346436858	YES
GCST90027656	k__Bacteria.p__Firmicutes.c__Negativicutes	OID20248	Intercellular adhesion molecule 2	P13598	ICAM2	Cardiometabolic	MR Egger	5	0.238465	0.125072	0.152632	-0.0171769	0.0148195	0.330304	0.171862	3	0.981999	rs12472147; rs12979658; rs2282037; rs77764206; rs78791321		NA	YES
GCST90027656	k__Bacteria.p__Firmicutes.c__Negativicutes	OID20248	Intercellular adhesion molecule 2	P13598	ICAM2	Cardiometabolic	Weighted median	5	0.0976705	0.0369948	0.00828772							rs12472147; rs12979658; rs2282037; rs77764206; rs78791321		NA	YES
GCST90027656	k__Bacteria.p__Firmicutes.c__Negativicutes	OID20248	Intercellular adhesion molecule 2	P13598	ICAM2	Cardiometabolic	MR-PRESSO	5	0.0975313	0.0180325	0.00565952							rs12472147; rs12979658; rs2282037; rs77764206; rs78791321		NA	YES
GCST90027656	k__Bacteria.p__Firmicutes.c__Negativicutes	OID30439	NAD-dependent protein deacetylase sirtuin-1	Q96EB6	SIRT1	Inflammation_II	Inverse variance weighted	5	-0.12901	0.0403997	0.00140634				1.59352	4	0.809956	rs12472147; rs12979658; rs2282037; rs77764206; rs78791321		0.0260172463215033	YES
GCST90027742	k__Bacteria.p__Firmicutes.c__Negativicutes.o__Selenomonadales	OID20248	Intercellular adhesion molecule 2	P13598	ICAM2	Cardiometabolic	Inverse variance weighted	5	0.0975337	0.0292984	0.000871672				1.51534	4	0.823921	rs12472147; rs12979658; rs2282037; rs77764206; rs78791321		0.0161259346436858	YES
GCST90027742	k__Bacteria.p__Firmicutes.c__Negativicutes.o__Selenomonadales	OID20248	Intercellular adhesion molecule 2	P13598	ICAM2	Cardiometabolic	MR Egger	5	0.238473	0.125076	0.152632	-0.0171771	0.0148196	0.330303	0.171877	3	0.981996	rs12472147; rs12979658; rs2282037; rs77764206; rs78791321		NA	YES
GCST90027742	k__Bacteria.p__Firmicutes.c__Negativicutes.o__Selenomonadales	OID20248	Intercellular adhesion molecule 2	P13598	ICAM2	Cardiometabolic	Weighted median	5	0.0976718	0.0359562	0.0065994							rs12472147; rs12979658; rs2282037; rs77764206; rs78791321		NA	YES
GCST90027742	k__Bacteria.p__Firmicutes.c__Negativicutes.o__Selenomonadales	OID20248	Intercellular adhesion molecule 2	P13598	ICAM2	Cardiometabolic	MR-PRESSO	5	0.0975337	0.0180331	0.00565971							rs12472147; rs12979658; rs2282037; rs77764206; rs78791321		NA	YES
GCST90027742	k__Bacteria.p__Firmicutes.c__Negativicutes.o__Selenomonadales	OID30439	NAD-dependent protein deacetylase sirtuin-1	Q96EB6	SIRT1	Inflammation_II	Inverse variance weighted	5	-0.129014	0.0404007	0.00140632				1.59349	4	0.809962	rs12472147; rs12979658; rs2282037; rs77764206; rs78791321		0.0260172463215033	YES
GCST90027742	k__Bacteria.p__Firmicutes.c__Negativicutes.o__Selenomonadales	OID30439	NAD-dependent protein deacetylase sirtuin-1	Q96EB6	SIRT1	Inflammation_II	MR Egger	5	0.059412	0.172234	0.752901	-0.0229753	0.020415	0.342324	0.326945	3	0.954884	rs12472147; rs12979658; rs2282037; rs77764206; rs78791321		NA	YES
GCST90027742	k__Bacteria.p__Firmicutes.c__Negativicutes.o__Selenomonadales	OID30439	NAD-dependent protein deacetylase sirtuin-1	Q96EB6	SIRT1	Inflammation_II	Weighted median	5	-0.131808	0.05193	0.0111431							rs12472147; rs12979658; rs2282037; rs77764206; rs78791321		NA	YES
GCST90027742	k__Bacteria.p__Firmicutes.c__Negativicutes.o__Selenomonadales	OID30439	NAD-dependent protein deacetylase sirtuin-1	Q96EB6	SIRT1	Inflammation_II	MR-PRESSO	5	-0.129014	0.0254996	0.00718338							rs12472147; rs12979658; rs2282037; rs77764206; rs78791321		NA	YES
GCST90027488	LACTOSECAT.PWY..lactose.and.galactose.degradation.I	OID30766	Complement component C7	P10643	C7	Inflammation_II	Inverse variance weighted	8	0.119413	0.0272475	1.17316e-05				2.66478	7	0.914187	rs118184992; rs17034687; rs191667368; rs4960590; rs507666; rs7147611; rs80205307; rs9982657		0.00043407026172428	YES
GCST90027488	LACTOSECAT.PWY..lactose.and.galactose.degradation.I	OID20601	Interleukin-5 receptor subunit alpha	Q01344	IL5RA	Inflammation	Inverse variance weighted	8	-0.108018	0.0279254	0.000109696				7.19439	7	0.408925	rs118184992; rs17034687; rs191667368; rs4960590; rs507666; rs7147611; rs80205307; rs9982657		0.00405874855889211	NO
GCST90027488	LACTOSECAT.PWY..lactose.and.galactose.degradation.I	OID20214	Pulmonary surfactant-associated protein D	P35247	SFTPD	Cardiometabolic	Inverse variance weighted	8	0.0858176	0.0231324	0.000207392				7.10848	7	0.417673	rs118184992; rs17034687; rs191667368; rs4960590; rs507666; rs7147611; rs80205307; rs9982657		0.00767348881050322	YES
GCST90027488	LACTOSECAT.PWY..lactose.and.galactose.degradation.I	OID30786	Alpha-1-antichymotrypsin	P01011	SERPINA3	Inflammation_II	Inverse variance weighted	8	0.109646	0.0297154	0.000224374				3.55364	7	0.829512	rs118184992; rs17034687; rs191667368; rs4960590; rs507666; rs7147611; rs80205307; rs9982657		0.00830184103958226	YES
GCST90027488	LACTOSECAT.PWY..lactose.and.galactose.degradation.I	OID20778	Fatty acid-binding protein, liver	P07148	FABP1	Inflammation	Inverse variance weighted	8	0.108653	0.029638	0.000246373				4.77618	7	0.687255	rs118184992; rs17034687; rs191667368; rs4960590; rs507666; rs7147611; rs80205307; rs9982657		0.00911580655542612	removed for bidirectional
GCST90027488	LACTOSECAT.PWY..lactose.and.galactose.degradation.I	OID30261	Sialic acid-binding Ig-like lectin 8	Q9NYZ4	SIGLEC8	Cardiometabolic_II	Inverse variance weighted	8	0.097759	0.0276515	0.000407172				5.61523	7	0.585323	rs118184992; rs17034687; rs191667368; rs4960590; rs507666; rs7147611; rs80205307; rs9982657		0.015065352717295	YES
GCST90027488	LACTOSECAT.PWY..lactose.and.galactose.degradation.I	OID20227	Fructose-1,6-bisphosphatase 1	P09467	FBP1	Cardiometabolic	Inverse variance weighted	8	0.10502	0.0302397	0.000514818				7.14083	7	0.414366	rs118184992; rs17034687; rs191667368; rs4960590; rs507666; rs7147611; rs80205307; rs9982657		0.019048279583662	YES
GCST90027488	LACTOSECAT.PWY..lactose.and.galactose.degradation.I	OID20776	Osteoclast-associated immunoglobulin-like receptor	Q8IYS5	OSCAR	Inflammation	Inverse variance weighted	8	0.0831121	0.0292478	0.0044881				8.43999	7	0.295398	rs118184992; rs17034687; rs191667368; rs4960590; rs507666; rs7147611; rs80205307; rs9982657		0.0276766344836336	NO
GCST90027488	LACTOSECAT.PWY..lactose.and.galactose.degradation.I	OID30572	Angiomotin	Q4VCS5	AMOT	Inflammation_II	Inverse variance weighted	8	0.0956916	0.0285257	0.000794873				3.61181	7	0.823245	rs118184992; rs17034687; rs191667368; rs4960590; rs507666; rs7147611; rs80205307; rs9982657		0.0294103151621662	YES
GCST90027488	LACTOSECAT.PWY..lactose.and.galactose.degradation.I	OID20381	Platelet glycoprotein Ib alpha chain	P07359	GP1BA	Cardiometabolic	Inverse variance weighted	8	0.0993422	0.0303401	0.00105929				5.88616	7	0.553103	rs118184992; rs17034687; rs191667368; rs4960590; rs507666; rs7147611; rs80205307; rs9982657		0.0391936738929843	YES
GCST90027488	LACTOSECAT.PWY..lactose.and.galactose.degradation.I	OID20282	C-X-C motif chemokine 16	Q9H2A7	CXCL16	Cardiometabolic	Inverse variance weighted	8	0.0884372	0.028971	0.00226858				6.78085	7	0.452049	rs118184992; rs17034687; rs191667368; rs4960590; rs507666; rs7147611; rs80205307; rs9982657		0.0435012673974929	NO
GCST90027488	LACTOSECAT.PWY..lactose.and.galactose.degradation.I	OID30448	T-cell surface glycoprotein CD3 gamma chain	P09693	CD3G	Inflammation_II	Inverse variance weighted	8	-0.101093	0.03203	0.0015985				7.23241	7	0.405089	rs118184992; rs17034687; rs191667368; rs4960590; rs507666; rs7147611; rs80205307; rs9982657		0.0445698574341704	YES
GCST90027488	LACTOSECAT.PWY..lactose.and.galactose.degradation.I	OID30777	Plasma protease C1 inhibitor	P05155	SERPING1	Inflammation_II	Inverse variance weighted	8	0.0942986	0.0291312	0.0012078				6.53728	7	0.478591	rs118184992; rs17034687; rs191667368; rs4960590; rs507666; rs7147611; rs80205307; rs9982657		0.0446887596832521	NO
GCST90027488	LACTOSECAT.PWY..lactose.and.galactose.degradation.I	OID20731	Triggering receptor expressed on myeloid cells 2	Q9NZC2	TREM2	Inflammation	Inverse variance weighted	8	0.0878399	0.0273032	0.00129445				6.08522	7	0.529835	rs118184992; rs17034687; rs191667368; rs4960590; rs507666; rs7147611; rs80205307; rs9982657		0.047894655238756	YES
GCST90027488	LACTOSECAT.PWY..lactose.and.galactose.degradation.I	OID20390	Neuropilin-1	O14786	NRP1	Cardiometabolic	Inverse variance weighted	8	0.0949402	0.0295328	0.00130562				7.13959	7	0.414492	rs118184992; rs17034687; rs191667368; rs4960590; rs507666; rs7147611; rs80205307; rs9982657		0.0483079406565199	NO
GCST90027488	LACTOSECAT.PWY..lactose.and.galactose.degradation.I	OID30756	Tetranectin	P05452	CLEC3B	Inflammation_II	Inverse variance weighted	8	0.0970179	0.0353827	0.00610748				9.78006	7	0.201384	rs118184992; rs17034687; rs191667368; rs4960590; rs507666; rs7147611; rs80205307; rs9982657		0.0714378372379069	NO
GCST90027488	LACTOSECAT.PWY..lactose.and.galactose.degradation.I	OID20347	Beta-Ala-His dipeptidase	Q96KN2	CNDP1	Cardiometabolic	Inverse variance weighted	8	-0.112854	0.0364448	0.00195775				11.1295	7	0.133071	rs118184992; rs17034687; rs191667368; rs4960590; rs507666; rs7147611; rs80205307; rs9982657		0.072436809237118	NO
GCST90027488	LACTOSECAT.PWY..lactose.and.galactose.degradation.I	OID20217	Heme oxygenase 1	P09601	HMOX1	Cardiometabolic	Inverse variance weighted	8	0.132638	0.0429652	0.00202118				14.5073	7	0.04286	rs118184992; rs17034687; rs191667368; rs4960590; rs507666; rs7147611; rs80205307; rs9982657		0.074783488267924	NO
GCST90027488	LACTOSECAT.PWY..lactose.and.galactose.degradation.I	OID30767	Heparin cofactor 2	P05546	SERPIND1	Inflammation_II	Inverse variance weighted	8	0.0904166	0.0293382	0.00205699				6.51324	7	0.481253	rs118184992; rs17034687; rs191667368; rs4960590; rs507666; rs7147611; rs80205307; rs9982657		0.0761087107875549	NO
GCST90027488	LACTOSECAT.PWY..lactose.and.galactose.degradation.I	OID30732	Clusterin	P10909	CLU	Inflammation_II	Inverse variance weighted	8	0.0931471	0.0305746	0.00231484				7.18535	7	0.409839	rs118184992; rs17034687; rs191667368; rs4960590; rs507666; rs7147611; rs80205307; rs9982657		0.0856490517621554	NO
GCST90027488	LACTOSECAT.PWY..lactose.and.galactose.degradation.I	OID30719	Complement component C8 beta chain	P07358	C8B	Inflammation_II	Inverse variance weighted	8	0.0826697	0.0328023	0.0117275				10.2242	7	0.176223	rs118184992; rs17034687; rs191667368; rs4960590; rs507666; rs7147611; rs80205307; rs9982657		0.108479591419031	NO
GCST90027488	LACTOSECAT.PWY..lactose.and.galactose.degradation.I	OID20200	Fatty acid-binding protein, intestinal	P12104	FABP2	Cardiometabolic	Inverse variance weighted	8	0.122337	0.0415901	0.0032662				13.2293	7	0.0667143	rs118184992; rs17034687; rs191667368; rs4960590; rs507666; rs7147611; rs80205307; rs9982657		0.120849508998145	NO
GCST90027488	LACTOSECAT.PWY..lactose.and.galactose.degradation.I	OID30750	Alpha-1-antitrypsin	P01009	SERPINA1	Inflammation_II	Inverse variance weighted	8	0.0906545	0.0309739	0.00342465				4.3482	7	0.738911	rs118184992; rs17034687; rs191667368; rs4960590; rs507666; rs7147611; rs80205307; rs9982657		0.126712084272598	NO
GCST90027488	LACTOSECAT.PWY..lactose.and.galactose.degradation.I	OID30727	Apolipoprotein E	P02649	APOE	Inflammation_II	Inverse variance weighted	8	0.0753453	0.0257923	0.00348651				1.85868	7	0.967246	rs118184992; rs17034687; rs191667368; rs4960590; rs507666; rs7147611; rs80205307; rs9982657		0.12900101993184	NO
GCST90027488	LACTOSECAT.PWY..lactose.and.galactose.degradation.I	OID20664	Calsyntenin-2	Q9H4D0	CLSTN2	Inflammation	Inverse variance weighted	8	0.0815951	0.0281903	0.00379839				4.82079	7	0.681822	rs118184992; rs17034687; rs191667368; rs4960590; rs507666; rs7147611; rs80205307; rs9982657		0.140540386310574	NO
GCST90027488	LACTOSECAT.PWY..lactose.and.galactose.degradation.I	OID30262	Mannosyl-oligosaccharide 1,2-alpha-mannosidase IB	O60476	MAN1A2	Cardiometabolic_II	Inverse variance weighted	8	0.0725214	0.0284162	0.0107071				3.29699	7	0.856237	rs118184992; rs17034687; rs191667368; rs4960590; rs507666; rs7147611; rs80205307; rs9982657		0.14331099955666	NO
GCST90027488	LACTOSECAT.PWY..lactose.and.galactose.degradation.I	OID20167	Immunoglobulin superfamily member 8	Q969P0	IGSF8	Cardiometabolic	Inverse variance weighted	8	0.0825316	0.0304143	0.00665601				4.30377	7	0.744199	rs118184992; rs17034687; rs191667368; rs4960590; rs507666; rs7147611; rs80205307; rs9982657		0.14921636091278	NO
GCST90027488	LACTOSECAT.PWY..lactose.and.galactose.degradation.I	OID20115	Growth/differentiation factor 8	O14793	MSTN	Cardiometabolic	Inverse variance weighted	8	0.104732	0.0395532	0.00810018				13.7399	7	0.0560054	rs118184992; rs17034687; rs191667368; rs4960590; rs507666; rs7147611; rs80205307; rs9982657		0.149853249450846	NO
GCST90027488	LACTOSECAT.PWY..lactose.and.galactose.degradation.I	OID30752	L-selectin	P14151	SELL	Inflammation_II	Inverse variance weighted	8	0.125325	0.0556483	0.0243167				27.8036	7	0.000238654	rs118184992; rs17034687; rs191667368; rs4960590; rs507666; rs7147611; rs80205307; rs9982657		0.149952849545844	NO
GCST90027488	LACTOSECAT.PWY..lactose.and.galactose.degradation.I	OID30746	Apolipoprotein D	P05090	APOD	Inflammation_II	Inverse variance weighted	8	0.0872456	0.0305425	0.00428301				5.76837	7	0.567041	rs118184992; rs17034687; rs191667368; rs4960590; rs507666; rs7147611; rs80205307; rs9982657		0.158471412384079	NO
GCST90027488	LACTOSECAT.PWY..lactose.and.galactose.degradation.I	OID30755	Complement factor B	P00751	CFB	Inflammation_II	Inverse variance weighted	8	0.113358	0.0397145	0.00431278				13.7289	7	0.0562177	rs118184992; rs17034687; rs191667368; rs4960590; rs507666; rs7147611; rs80205307; rs9982657		0.159572903361664	NO
GCST90027488	LACTOSECAT.PWY..lactose.and.galactose.degradation.I	OID30527	Granulocyte colony-stimulating factor receptor	Q99062	CSF3R	Inflammation_II	Inverse variance weighted	8	0.0897233	0.0315551	0.00446374				7.49167	7	0.37954	rs118184992; rs17034687; rs191667368; rs4960590; rs507666; rs7147611; rs80205307; rs9982657		0.165158278390661	NO
GCST90027488	LACTOSECAT.PWY..lactose.and.galactose.degradation.I	OID30577	Secretoglobin family 3A member 1	Q96QR1	SCGB3A1	Inflammation_II	Inverse variance weighted	8	0.0770737	0.0295687	0.00914464				5.00216	7	0.6597	rs118184992; rs17034687; rs191667368; rs4960590; rs507666; rs7147611; rs80205307; rs9982657		0.169175895808347	NO
GCST90027488	LACTOSECAT.PWY..lactose.and.galactose.degradation.I	OID30769	Apolipoprotein A-I	P02647	APOA1	Inflammation_II	Inverse variance weighted	8	0.0805349	0.0287107	0.00503088				6.57944	7	0.47394	rs118184992; rs17034687; rs191667368; rs4960590; rs507666; rs7147611; rs80205307; rs9982657		0.186142689837631	NO
GCST90027488	LACTOSECAT.PWY..lactose.and.galactose.degradation.I	OID20345	Vasorin	Q6EMK4	VASN	Cardiometabolic	Inverse variance weighted	8	0.0921139	0.0397087	0.020355				13.0496	7	0.0709088	rs118184992; rs17034687; rs191667368; rs4960590; rs507666; rs7147611; rs80205307; rs9982657		0.188283946603669	NO
GCST90027488	LACTOSECAT.PWY..lactose.and.galactose.degradation.I	OID30775	CD5 antigen-like	O43866	CD5L	Inflammation_II	Inverse variance weighted	8	-0.0817665	0.0406587	0.0443205				13.026	7	0.0714763	rs118184992; rs17034687; rs191667368; rs4960590; rs507666; rs7147611; rs80205307; rs9982657		0.191500116459807	NO
GCST90027494	P105.PWY..TCA.cycle.IV..2.oxoglutarate.decarboxylase.	OID20073	REST corepressor 1	Q9UKL0	RCOR1	Cardiometabolic	Inverse variance weighted	2	0.174278	0.0416457	2.85446e-05				0.00121175	1	0.972231	rs36182340; rs72814612		0.00105614885040863	YES
GCST90027538	PWY.5088..L.glutamate.degradation.VIII..to.propanoate.	OID30576	CMRF35-like molecule 8	Q9UGN4	CD300A	Inflammation_II	Inverse variance weighted	4	-0.0694124	0.0212424	0.0010845				0.257174	3	0.967871	rs11732315; rs12028490; rs2127754; rs9927590		0.0401263547248931	YES
GCST90027538	PWY.5088..L.glutamate.degradation.VIII..to.propanoate.	OID30576	CMRF35-like molecule 8	Q9UGN4	CD300A	Inflammation_II	MR Egger	4	-0.0606023	0.0660284	0.455603	-0.00231471	0.0164255	0.900845	0.237315	2	0.888112	rs11732315; rs12028490; rs2127754; rs9927590		NA	YES
GCST90027538	PWY.5088..L.glutamate.degradation.VIII..to.propanoate.	OID30576	CMRF35-like molecule 8	Q9UGN4	CD300A	Inflammation_II	Weighted median	4	-0.0708951	0.0266388	0.00778288							rs11732315; rs12028490; rs2127754; rs9927590		NA	YES
GCST90027538	PWY.5088..L.glutamate.degradation.VIII..to.propanoate.	OID30576	CMRF35-like molecule 8	Q9UGN4	CD300A	Inflammation_II	MR-PRESSO	4	-0.0694124	0.00621951	0.00154176							rs11732315; rs12028490; rs2127754; rs9927590		NA	YES
GCST90027572	PWY.6151..S.adenosyl.L.methionine.cycle.I	OID30265	Zona pellucida sperm-binding protein 3	P21754	ZP3	Cardiometabolic_II	MR-PRESSO	8	-0.0676491	0.0158795	0.00374586							rs116996492; rs12530267; rs1751578; rs2235334; rs2827430; rs62314649; rs6879880; rs7513344		NA	YES
GCST90027572	PWY.6151..S.adenosyl.L.methionine.cycle.I	OID30265	Zona pellucida sperm-binding protein 3	P21754	ZP3	Cardiometabolic_II	Weighted median	8	-0.0645341	0.028166	0.0219517							rs116996492; rs12530267; rs1751578; rs2235334; rs2827430; rs62314649; rs6879880; rs7513344		NA	YES
GCST90027572	PWY.6151..S.adenosyl.L.methionine.cycle.I	OID30265	Zona pellucida sperm-binding protein 3	P21754	ZP3	Cardiometabolic_II	MR Egger	8	-0.0119409	0.07013	0.870396	-0.00595943	0.00718021	0.438319	3.58362	6	0.732813	rs116996492; rs12530267; rs1751578; rs2235334; rs2827430; rs62314649; rs6879880; rs7513344		NA	YES
GCST90027572	PWY.6151..S.adenosyl.L.methionine.cycle.I	OID30265	Zona pellucida sperm-binding protein 3	P21754	ZP3	Cardiometabolic_II	Inverse variance weighted	8	-0.0676491	0.0203257	0.000873904				4.27249	7	0.747911	rs116996492; rs12530267; rs1751578; rs2235334; rs2827430; rs62314649; rs6879880; rs7513344		0.0323344600140519	YES
GCST90027572	PWY.6151..S.adenosyl.L.methionine.cycle.I	OID20743	Epithelial cell adhesion molecule	P16422	EPCAM	Inflammation	Inverse variance weighted	8	-0.117782	0.0319751	0.000229998				6.73094	7	0.457421	rs116996492; rs12530267; rs1751578; rs2235334; rs2827430; rs62314649; rs6879880; rs7513344		0.00850991288631263	YES
GCST90027572	PWY.6151..S.adenosyl.L.methionine.cycle.I	OID20743	Epithelial cell adhesion molecule	P16422	EPCAM	Inflammation	MR Egger	8	-0.16176	0.115409	0.21058	0.00470183	0.0118099	0.704317	6.55771	6	0.363691	rs116996492; rs12530267; rs1751578; rs2235334; rs2827430; rs62314649; rs6879880; rs7513344		NA	YES
GCST90027572	PWY.6151..S.adenosyl.L.methionine.cycle.I	OID20743	Epithelial cell adhesion molecule	P16422	EPCAM	Inflammation	Weighted median	8	-0.110447	0.042978	0.0101744							rs116996492; rs12530267; rs1751578; rs2235334; rs2827430; rs62314649; rs6879880; rs7513344		NA	YES
GCST90027572	PWY.6151..S.adenosyl.L.methionine.cycle.I	OID20743	Epithelial cell adhesion molecule	P16422	EPCAM	Inflammation	MR-PRESSO	8	-0.117782	0.0313545	0.00710773							rs116996492; rs12530267; rs1751578; rs2235334; rs2827430; rs62314649; rs6879880; rs7513344		NA	YES
GCST90027579	PWY.6353..purine.nucleotides.degradation.II..aerobic.	OID20374	Apolipoprotein M	O95445	APOM	Cardiometabolic	MR Egger	9	0.0820456	0.138304	0.571689	-0.0202573	0.0145878	0.207519	5.28307	7	0.625462	rs10801008; rs12201310; rs12336386; rs132685; rs2137304; rs2895633; rs396769; rs4551833; rs7527876		NA	YES
GCST90027579	PWY.6353..purine.nucleotides.degradation.II..aerobic.	OID20374	Apolipoprotein M	O95445	APOM	Cardiometabolic	Inverse variance weighted	9	-0.105364	0.0302359	0.000492601				7.21143	8	0.514003	rs10801008; rs12201310; rs12336386; rs132685; rs2137304; rs2895633; rs396769; rs4551833; rs7527876		0.018226229757319	YES
GCST90027579	PWY.6353..purine.nucleotides.degradation.II..aerobic.	OID20374	Apolipoprotein M	O95445	APOM	Cardiometabolic	Weighted median	9	-0.0840567	0.0413388	0.042016							rs10801008; rs12201310; rs12336386; rs132685; rs2137304; rs2895633; rs396769; rs4551833; rs7527876		NA	YES
GCST90027579	PWY.6353..purine.nucleotides.degradation.II..aerobic.	OID20374	Apolipoprotein M	O95445	APOM	Cardiometabolic	MR-PRESSO	9	-0.105364	0.028707	0.00630643							rs10801008; rs12201310; rs12336386; rs132685; rs2137304; rs2895633; rs396769; rs4551833; rs7527876		NA	YES
GCST90027596	PWY.6708..ubiquinol.8.biosynthesis..prokaryotic.	OID20712	Delta and Notch-like epidermal growth factor-related receptor	Q8NFT8	DNER	Inflammation	MR Egger	6	-0.0265646	0.0766929	0.746513	-0.00879503	0.0130555	0.537448	2.7385	4	0.602494	rs113976504; rs11898768; rs12550124; rs1624064; rs2636908; rs3750879		NA	YES
GCST90027596	PWY.6708..ubiquinol.8.biosynthesis..prokaryotic.	OID20493	Integrin beta-6	P18564	ITGB6	Inflammation	Inverse variance weighted	6	-0.0743775	0.0227844	0.00109694				2.81618	5	0.728299	rs113976504; rs11898768; rs12550124; rs1624064; rs2636908; rs3750879		0.0405868306797717	YES
GCST90027596	PWY.6708..ubiquinol.8.biosynthesis..prokaryotic.	OID20712	Delta and Notch-like epidermal growth factor-related receptor	Q8NFT8	DNER	Inflammation	Inverse variance weighted	6	-0.0757888	0.0232946	0.00113996				3.19233	5	0.670362	rs113976504; rs11898768; rs12550124; rs1624064; rs2636908; rs3750879		0.0421783379589769	YES
GCST90027596	PWY.6708..ubiquinol.8.biosynthesis..prokaryotic.	OID20493	Integrin beta-6	P18564	ITGB6	Inflammation	MR Egger	6	-0.0939462	0.0750383	0.27879	0.00349824	0.012781	0.797863	2.74127	4	0.602013	rs113976504; rs11898768; rs12550124; rs1624064; rs2636908; rs3750879		NA	YES
GCST90027596	PWY.6708..ubiquinol.8.biosynthesis..prokaryotic.	OID20493	Integrin beta-6	P18564	ITGB6	Inflammation	Weighted median	6	-0.0699816	0.0292836	0.016858							rs113976504; rs11898768; rs12550124; rs1624064; rs2636908; rs3750879		NA	YES
GCST90027596	PWY.6708..ubiquinol.8.biosynthesis..prokaryotic.	OID20493	Integrin beta-6	P18564	ITGB6	Inflammation	MR-PRESSO	6	-0.0743775	0.0170995	0.00736133							rs113976504; rs11898768; rs12550124; rs1624064; rs2636908; rs3750879		NA	YES
GCST90027596	PWY.6708..ubiquinol.8.biosynthesis..prokaryotic.	OID20712	Delta and Notch-like epidermal growth factor-related receptor	Q8NFT8	DNER	Inflammation	Weighted median	6	-0.0621144	0.0301438	0.0393408							rs113976504; rs11898768; rs12550124; rs1624064; rs2636908; rs3750879		NA	YES
GCST90027596	PWY.6708..ubiquinol.8.biosynthesis..prokaryotic.	OID20712	Delta and Notch-like epidermal growth factor-related receptor	Q8NFT8	DNER	Inflammation	MR-PRESSO	6	-0.0757888	0.0186133	0.00961739							rs113976504; rs11898768; rs12550124; rs1624064; rs2636908; rs3750879		NA	YES
GCST90027612	PWY.7209..superpathway.of.pyrimidine.ribonucleosides.degradation	OID20304	Tyrosine-protein phosphatase non-receptor type substrate 1	P78324	SIRPA	Cardiometabolic	Inverse variance weighted	10	-0.0403898	0.0124374	0.00116449				3.46607	9	0.942926	rs10489050; rs11215429; rs11242123; rs1474383; rs261555; rs4783336; rs617079; rs6587723; rs6805759; rs836868		0.043086244230514	YES
GCST90027612	PWY.7209..superpathway.of.pyrimidine.ribonucleosides.degradation	OID20304	Tyrosine-protein phosphatase non-receptor type substrate 1	P78324	SIRPA	Cardiometabolic	MR Egger	10	-0.0829552	0.0410857	0.0781703	0.00558663	0.00513941	0.308692	2.28446	8	0.971026	rs10489050; rs11215429; rs11242123; rs1474383; rs261555; rs4783336; rs617079; rs6587723; rs6805759; rs836868		NA	YES
GCST90027612	PWY.7209..superpathway.of.pyrimidine.ribonucleosides.degradation	OID20304	Tyrosine-protein phosphatase non-receptor type substrate 1	P78324	SIRPA	Cardiometabolic	Weighted median	10	-0.03884	0.0158279	0.0141321							rs10489050; rs11215429; rs11242123; rs1474383; rs261555; rs4783336; rs617079; rs6587723; rs6805759; rs836868		NA	YES
GCST90027612	PWY.7209..superpathway.of.pyrimidine.ribonucleosides.degradation	OID20304	Tyrosine-protein phosphatase non-receptor type substrate 1	P78324	SIRPA	Cardiometabolic	MR-PRESSO	10	-0.0403898	0.00771842	0.000539829							rs10489050; rs11215429; rs11242123; rs1474383; rs261555; rs4783336; rs617079; rs6587723; rs6805759; rs836868		NA	YES
GCST90027612	PWY.7209..superpathway.of.pyrimidine.ribonucleosides.degradation	OID30143	Nucleoprotein TPR	P12270	TPR	Cardiometabolic_II	Inverse variance weighted	10	-0.0886548	0.025113	0.000415188				7.42013	9	0.593464	rs10489050; rs11215429; rs11242123; rs1474383; rs261555; rs4783336; rs617079; rs6587723; rs6805759; rs836868		0.0153619544753978	YES
GCST90027612	PWY.7209..superpathway.of.pyrimidine.ribonucleosides.degradation	OID30238	Inactive ribonuclease-like protein 10	Q5GAN6	RNASE10	Cardiometabolic_II	Weighted median	10	-0.056398	0.0271415	0.0377158							rs10489050; rs11215429; rs11242123; rs1474383; rs261555; rs4783336; rs617079; rs6587723; rs6805759; rs836868		NA	YES
GCST90027612	PWY.7209..superpathway.of.pyrimidine.ribonucleosides.degradation	OID30238	Inactive ribonuclease-like protein 10	Q5GAN6	RNASE10	Cardiometabolic_II	MR-PRESSO	10	-0.0662157	0.0190108	0.00690526							rs10489050; rs11215429; rs11242123; rs1474383; rs261555; rs4783336; rs617079; rs6587723; rs6805759; rs836868		NA	YES
GCST90027612	PWY.7209..superpathway.of.pyrimidine.ribonucleosides.degradation	OID30266	Gastric triacylglycerol lipase	P07098	LIPF	Cardiometabolic_II	Inverse variance weighted	10	-0.0912736	0.0240176	0.000144529				8.44153	9	0.490334	rs10489050; rs11215429; rs11242123; rs1474383; rs261555; rs4783336; rs617079; rs6587723; rs6805759; rs836868		0.00534756975895758	YES
GCST90027612	PWY.7209..superpathway.of.pyrimidine.ribonucleosides.degradation	OID30266	Gastric triacylglycerol lipase	P07098	LIPF	Cardiometabolic_II	MR Egger	10	-0.0424389	0.0794716	0.607847	-0.00640782	0.00993868	0.537144	8.02457	8	0.431074	rs10489050; rs11215429; rs11242123; rs1474383; rs261555; rs4783336; rs617079; rs6587723; rs6805759; rs836868		NA	YES
GCST90027612	PWY.7209..superpathway.of.pyrimidine.ribonucleosides.degradation	OID30143	Nucleoprotein TPR	P12270	TPR	Cardiometabolic_II	MR Egger	10	0.0380613	0.0829693	0.658627	-0.0166312	0.0103787	0.147728	4.85235	8	0.773235	rs10489050; rs11215429; rs11242123; rs1474383; rs261555; rs4783336; rs617079; rs6587723; rs6805759; rs836868		NA	YES
GCST90027612	PWY.7209..superpathway.of.pyrimidine.ribonucleosides.degradation	OID30143	Nucleoprotein TPR	P12270	TPR	Cardiometabolic_II	Weighted median	10	-0.0934672	0.0348327	0.00728958							rs10489050; rs11215429; rs11242123; rs1474383; rs261555; rs4783336; rs617079; rs6587723; rs6805759; rs836868		NA	YES
GCST90027612	PWY.7209..superpathway.of.pyrimidine.ribonucleosides.degradation	OID30143	Nucleoprotein TPR	P12270	TPR	Cardiometabolic_II	MR-PRESSO	10	-0.0886548	0.0228025	0.00368652							rs10489050; rs11215429; rs11242123; rs1474383; rs261555; rs4783336; rs617079; rs6587723; rs6805759; rs836868		NA	YES
GCST90027612	PWY.7209..superpathway.of.pyrimidine.ribonucleosides.degradation	OID30238	Inactive ribonuclease-like protein 10	Q5GAN6	RNASE10	Cardiometabolic_II	Inverse variance weighted	10	-0.0662157	0.0197386	0.000794731				8.34852	9	0.499441	rs10489050; rs11215429; rs11242123; rs1474383; rs261555; rs4783336; rs617079; rs6587723; rs6805759; rs836868		0.0294050286165553	YES
GCST90027612	PWY.7209..superpathway.of.pyrimidine.ribonucleosides.degradation	OID30238	Inactive ribonuclease-like protein 10	Q5GAN6	RNASE10	Cardiometabolic_II	MR Egger	10	-0.105731	0.0651787	0.143423	0.00518591	0.00815222	0.542455	7.94386	8	0.438974	rs10489050; rs11215429; rs11242123; rs1474383; rs261555; rs4783336; rs617079; rs6587723; rs6805759; rs836868		NA	YES
GCST90027612	PWY.7209..superpathway.of.pyrimidine.ribonucleosides.degradation	OID30266	Gastric triacylglycerol lipase	P07098	LIPF	Cardiometabolic_II	Weighted median	10	-0.0821251	0.0313649	0.00883494							rs10489050; rs11215429; rs11242123; rs1474383; rs261555; rs4783336; rs617079; rs6587723; rs6805759; rs836868		NA	YES
GCST90027612	PWY.7209..superpathway.of.pyrimidine.ribonucleosides.degradation	OID30266	Gastric triacylglycerol lipase	P07098	LIPF	Cardiometabolic_II	MR-PRESSO	10	-0.0912736	0.0232605	0.00348979							rs10489050; rs11215429; rs11242123; rs1474383; rs261555; rs4783336; rs617079; rs6587723; rs6805759; rs836868		NA	YES
GCST90027616	PWY.7234..inosine.5..phosphate.biosynthesis.III	OID20369	Transferrin receptor protein 1	P02786	TFRC	Cardiometabolic	Inverse variance weighted	6	0.135691	0.034615	8.85458e-05				4.09259	5	0.536163	rs112075774; rs117005933; rs1275053; rs35096174; rs79676117; rs928495		0.00327619565867074	YES
GCST90027616	PWY.7234..inosine.5..phosphate.biosynthesis.III	OID20369	Transferrin receptor protein 1	P02786	TFRC	Cardiometabolic	MR Egger	6	-0.0155327	0.266094	0.956251	0.0240592	0.0419749	0.597206	3.76406	4	0.438878	rs112075774; rs117005933; rs1275053; rs35096174; rs79676117; rs928495		NA	YES
GCST90027616	PWY.7234..inosine.5..phosphate.biosynthesis.III	OID20369	Transferrin receptor protein 1	P02786	TFRC	Cardiometabolic	Weighted median	6	0.11921	0.0458826	0.0093724							rs112075774; rs117005933; rs1275053; rs35096174; rs79676117; rs928495		NA	YES
GCST90027616	PWY.7234..inosine.5..phosphate.biosynthesis.III	OID20369	Transferrin receptor protein 1	P02786	TFRC	Cardiometabolic	MR-PRESSO	6	0.135691	0.0313169	0.00747927							rs112075774; rs117005933; rs1275053; rs35096174; rs79676117; rs928495		NA	YES
GCST90027628	PWY.841..superpathway.of.purine.nucleotides.de.novo.biosynthesis.I	OID30074	Microtubule-associated proteins 1A/1B light chain 3 beta 2	A6NCE7	MAP1LC3B2	Cardiometabolic_II	Inverse variance weighted	5	0.156455	0.046063	0.000682419				4.76803	4	0.311937	rs11588127; rs1584586; rs35698389; rs57187632; rs60748324		0.0252495206310319	YES
GCST90027628	PWY.841..superpathway.of.purine.nucleotides.de.novo.biosynthesis.I	OID30074	Microtubule-associated proteins 1A/1B light chain 3 beta 2	A6NCE7	MAP1LC3B2	Cardiometabolic_II	MR Egger	5	0.277375	0.257545	0.360373	-0.0144042	0.0300654	0.664625	4.42915	3	0.218697	rs11588127; rs1584586; rs35698389; rs57187632; rs60748324		NA	YES
GCST90027628	PWY.841..superpathway.of.purine.nucleotides.de.novo.biosynthesis.I	OID30074	Microtubule-associated proteins 1A/1B light chain 3 beta 2	A6NCE7	MAP1LC3B2	Cardiometabolic_II	Weighted median	5	0.156318	0.057494	0.00655085							rs11588127; rs1584586; rs35698389; rs57187632; rs60748324		NA	YES
GCST90027628	PWY.841..superpathway.of.purine.nucleotides.de.novo.biosynthesis.I	OID30074	Microtubule-associated proteins 1A/1B light chain 3 beta 2	A6NCE7	MAP1LC3B2	Cardiometabolic_II	MR-PRESSO	5	0.156455	0.046063	0.0273643							rs11588127; rs1584586; rs35698389; rs57187632; rs60748324		NA	YES
GCST90027638	PYRIDNUCSYN.PWY..NAD.biosynthesis.I..from.aspartate.	OID30223	Dystrophin	P11532	DMD	Cardiometabolic_II	Inverse variance weighted	8	-0.116678	0.0334872	0.000493513				4.00431	7	0.779281	rs1126742; rs12871823; rs143920868; rs148280750; rs169503; rs74459573; rs8045981; rs9811455		0.0182599677405518	YES
GCST90027638	PYRIDNUCSYN.PWY..NAD.biosynthesis.I..from.aspartate.	OID30223	Dystrophin	P11532	DMD	Cardiometabolic_II	MR Egger	8	-0.0578999	0.134015	0.680806	-0.00709533	0.0156643	0.666495	3.79913	6	0.703837	rs1126742; rs12871823; rs143920868; rs148280750; rs169503; rs74459573; rs8045981; rs9811455		NA	YES
GCST90027638	PYRIDNUCSYN.PWY..NAD.biosynthesis.I..from.aspartate.	OID30223	Dystrophin	P11532	DMD	Cardiometabolic_II	Weighted median	8	-0.0932896	0.0442939	0.0351912							rs1126742; rs12871823; rs143920868; rs148280750; rs169503; rs74459573; rs8045981; rs9811455		NA	YES
GCST90027638	PYRIDNUCSYN.PWY..NAD.biosynthesis.I..from.aspartate.	OID30223	Dystrophin	P11532	DMD	Cardiometabolic_II	MR-PRESSO	8	-0.116678	0.0253276	0.00246441							rs1126742; rs12871823; rs143920868; rs148280750; rs169503; rs74459573; rs8045981; rs9811455		NA	YES
GCST90027638	PYRIDNUCSYN.PWY..NAD.biosynthesis.I..from.aspartate.	OID30347	Melanotransferrin	P08582	MELTF	Cardiometabolic_II	Inverse variance weighted	8	-0.107754	0.0295464	0.000265396				6.30954	7	0.504107	rs1126742; rs12871823; rs143920868; rs148280750; rs169503; rs74459573; rs8045981; rs9811455		0.00981964782532097	YES
GCST90027638	PYRIDNUCSYN.PWY..NAD.biosynthesis.I..from.aspartate.	OID30347	Melanotransferrin	P08582	MELTF	Cardiometabolic_II	MR Egger	8	-0.0226631	0.119437	0.855762	-0.0103733	0.0141079	0.489899	5.76889	6	0.44957	rs1126742; rs12871823; rs143920868; rs148280750; rs169503; rs74459573; rs8045981; rs9811455		NA	YES
GCST90027638	PYRIDNUCSYN.PWY..NAD.biosynthesis.I..from.aspartate.	OID30347	Melanotransferrin	P08582	MELTF	Cardiometabolic_II	Weighted median	8	-0.0887177	0.0425313	0.0369841							rs1126742; rs12871823; rs143920868; rs148280750; rs169503; rs74459573; rs8045981; rs9811455		NA	YES
GCST90027638	PYRIDNUCSYN.PWY..NAD.biosynthesis.I..from.aspartate.	OID30347	Melanotransferrin	P08582	MELTF	Cardiometabolic_II	MR-PRESSO	8	-0.107754	0.0280514	0.00636387							rs1126742; rs12871823; rs143920868; rs148280750; rs169503; rs74459573; rs8045981; rs9811455		NA	YES
GCST90027638	PYRIDNUCSYN.PWY..NAD.biosynthesis.I..from.aspartate.	OID30783	Serotransferrin	P02787	TF	Inflammation_II	Inverse variance weighted	8	-0.111908	0.0339536	0.00098107				7.68778	7	0.360928	rs1126742; rs12871823; rs143920868; rs148280750; rs169503; rs74459573; rs8045981; rs9811455		0.0362995966272493	YES
GCST90027638	PYRIDNUCSYN.PWY..NAD.biosynthesis.I..from.aspartate.	OID30783	Serotransferrin	P02787	TF	Inflammation_II	MR Egger	8	-0.0838332	0.146513	0.587974	-0.00339652	0.0171649	0.849676	7.63794	6	0.265847	rs1126742; rs12871823; rs143920868; rs148280750; rs169503; rs74459573; rs8045981; rs9811455		NA	YES
GCST90027638	PYRIDNUCSYN.PWY..NAD.biosynthesis.I..from.aspartate.	OID30783	Serotransferrin	P02787	TF	Inflammation_II	Weighted median	8	-0.132908	0.0470065	0.00469228							rs1126742; rs12871823; rs143920868; rs148280750; rs169503; rs74459573; rs8045981; rs9811455		NA	YES
GCST90027638	PYRIDNUCSYN.PWY..NAD.biosynthesis.I..from.aspartate.	OID30783	Serotransferrin	P02787	TF	Inflammation_II	MR-PRESSO	8	-0.111908	0.0339536	0.0131949							rs1126742; rs12871823; rs143920868; rs148280750; rs169503; rs74459573; rs8045981; rs9811455		NA	YES
GCST90027647	TRPSYN.PWY..L.tryptophan.biosynthesis	OID30540	Nephrin	O60500	NPHS1	Inflammation_II	Inverse variance weighted	5	-0.185117	0.0555597	0.000862685				7.14935	4	0.128203	rs17399145; rs1990421; rs2935713; rs55893824; rs62241211		0.0319193408009384	YES
GCST90027647	TRPSYN.PWY..L.tryptophan.biosynthesis	OID30540	Nephrin	O60500	NPHS1	Inflammation_II	MR Egger	5	-0.282825	0.215425	0.280624	0.0105289	0.0222355	0.668168	6.65216	3	0.0838509	rs17399145; rs1990421; rs2935713; rs55893824; rs62241211		NA	YES
GCST90027647	TRPSYN.PWY..L.tryptophan.biosynthesis	OID30540	Nephrin	O60500	NPHS1	Inflammation_II	Weighted median	5	-0.160244	0.0586645	0.00630415							rs17399145; rs1990421; rs2935713; rs55893824; rs62241211		NA	YES
GCST90027647	TRPSYN.PWY..L.tryptophan.biosynthesis	OID30540	Nephrin	O60500	NPHS1	Inflammation_II	MR-PRESSO	5	-0.185117	0.0555597	0.0290553							rs17399145; rs1990421; rs2935713; rs55893824; rs62241211		NA	YES
GCST90027736	k__Bacteria.p__Actinobacteria.c__Actinobacteria.o__Bifidobacteriales	OID20660	Cathepsin O	P43234	CTSO	Inflammation	Inverse variance weighted	6	-0.0921097	0.0329666	0.00520555				2.60296	5	0.760916	rs10455532; rs12657170; rs182549; rs4851317; rs4859454; rs74452406		0.0481670842615239	removed for leave-one-out
GCST90027736	k__Bacteria.p__Actinobacteria.c__Actinobacteria.o__Bifidobacteriales	OID20660	Cathepsin O	P43234	CTSO	Inflammation	MR Egger	6	-0.0683576	0.105121	0.550975	-0.00270491	0.0113674	0.82361	2.54634	4	0.636358	rs10455532; rs12657170; rs182549; rs4851317; rs4859454; rs74452406		NA	removed for leave-one-out
GCST90027736	k__Bacteria.p__Actinobacteria.c__Actinobacteria.o__Bifidobacteriales	OID20660	Cathepsin O	P43234	CTSO	Inflammation	Weighted median	6	-0.100059	0.0412216	0.0152095							rs10455532; rs12657170; rs182549; rs4851317; rs4859454; rs74452406		NA	removed for leave-one-out
GCST90027736	k__Bacteria.p__Actinobacteria.c__Actinobacteria.o__Bifidobacteriales	OID20660	Cathepsin O	P43234	CTSO	Inflammation	MR-PRESSO	6	-0.0921097	0.0237861	0.0117315							rs10455532; rs12657170; rs182549; rs4851317; rs4859454; rs74452406		NA	removed for leave-one-out
GCST90027736	k__Bacteria.p__Actinobacteria.c__Actinobacteria.o__Bifidobacteriales	OID30715	Cysteine-rich secretory protein 3	P54108	CRISP3	Inflammation_II	MR-PRESSO	6	-0.0919116	0.0310743	0.0315991							rs10455532; rs12657170; rs182549; rs4851317; rs4859454; rs74452406		NA	removed for leave-one-out
GCST90027736	k__Bacteria.p__Actinobacteria.c__Actinobacteria.o__Bifidobacteriales	OID30715	Cysteine-rich secretory protein 3	P54108	CRISP3	Inflammation_II	Weighted median	6	-0.0827882	0.0410853	0.0439011							rs10455532; rs12657170; rs182549; rs4851317; rs4859454; rs74452406		NA	removed for leave-one-out
GCST90027736	k__Bacteria.p__Actinobacteria.c__Actinobacteria.o__Bifidobacteriales	OID30715	Cysteine-rich secretory protein 3	P54108	CRISP3	Inflammation_II	Inverse variance weighted	6	-0.0919116	0.0310743	0.00309842				5.56479	5	0.350894	rs10455532; rs12657170; rs182549; rs4851317; rs4859454; rs74452406		0.0382138408743605	removed for leave-one-out
GCST90027736	k__Bacteria.p__Actinobacteria.c__Actinobacteria.o__Bifidobacteriales	OID30715	Cysteine-rich secretory protein 3	P54108	CRISP3	Inflammation_II	MR Egger	6	-0.254495	0.094296	0.0541562	0.0187833	0.0103489	0.143709	2.27054	4	0.686137	rs10455532; rs12657170; rs182549; rs4851317; rs4859454; rs74452406		NA	removed for leave-one-out
GCST90027662	k__Bacteria.p__Actinobacteria.c__Actinobacteria.o__Bifidobacteriales.f__Bifidobacteriaceae	OID20660	Cathepsin O	P43234	CTSO	Inflammation	Inverse variance weighted	6	-0.0921	0.0329644	0.00520725				2.60355	5	0.760826	rs10455532; rs12657170; rs182549; rs4851317; rs4859454; rs74452406		0.0481670842615239	removed for leave-one-out
GCST90027662	k__Bacteria.p__Actinobacteria.c__Actinobacteria.o__Bifidobacteriales.f__Bifidobacteriaceae	OID20660	Cathepsin O	P43234	CTSO	Inflammation	MR Egger	6	-0.0682975	0.105064	0.551101	-0.00271098	0.011362	0.823141	2.54662	4	0.636308	rs10455532; rs12657170; rs182549; rs4851317; rs4859454; rs74452406		NA	removed for leave-one-out
GCST90027662	k__Bacteria.p__Actinobacteria.c__Actinobacteria.o__Bifidobacteriales.f__Bifidobacteriaceae	OID20660	Cathepsin O	P43234	CTSO	Inflammation	Weighted median	6	-0.100072	0.042509	0.0185653							rs10455532; rs12657170; rs182549; rs4851317; rs4859454; rs74452406		NA	removed for leave-one-out
GCST90027662	k__Bacteria.p__Actinobacteria.c__Actinobacteria.o__Bifidobacteriales.f__Bifidobacteriaceae	OID20660	Cathepsin O	P43234	CTSO	Inflammation	MR-PRESSO	6	-0.0921	0.0237872	0.0117384							rs10455532; rs12657170; rs182549; rs4851317; rs4859454; rs74452406		NA	removed for leave-one-out
GCST90027662	k__Bacteria.p__Actinobacteria.c__Actinobacteria.o__Bifidobacteriales.f__Bifidobacteriaceae	OID30715	Cysteine-rich secretory protein 3	P54108	CRISP3	Inflammation_II	Inverse variance weighted	6	-0.0919099	0.0310687	0.00309361				5.56364	5	0.351018	rs10455532; rs12657170; rs182549; rs4851317; rs4859454; rs74452406		0.0382138408743605	removed for leave-one-out
GCST90027662	k__Bacteria.p__Actinobacteria.c__Actinobacteria.o__Bifidobacteriales.f__Bifidobacteriaceae	OID30715	Cysteine-rich secretory protein 3	P54108	CRISP3	Inflammation_II	MR Egger	6	-0.254332	0.0942456	0.0541723	0.018767	0.0103441	0.143833	2.2721	4	0.685854	rs10455532; rs12657170; rs182549; rs4851317; rs4859454; rs74452406		NA	removed for leave-one-out
GCST90027662	k__Bacteria.p__Actinobacteria.c__Actinobacteria.o__Bifidobacteriales.f__Bifidobacteriaceae	OID30715	Cysteine-rich secretory protein 3	P54108	CRISP3	Inflammation_II	Weighted median	6	-0.0827983	0.0419369	0.0483418							rs10455532; rs12657170; rs182549; rs4851317; rs4859454; rs74452406		NA	removed for leave-one-out
GCST90027662	k__Bacteria.p__Actinobacteria.c__Actinobacteria.o__Bifidobacteriales.f__Bifidobacteriaceae	OID30715	Cysteine-rich secretory protein 3	P54108	CRISP3	Inflammation_II	MR-PRESSO	6	-0.0919099	0.0310687	0.0315816							rs10455532; rs12657170; rs182549; rs4851317; rs4859454; rs74452406		NA	removed for leave-one-out
GCST90027688	k__Bacteria.p__Actinobacteria.c__Actinobacteria.o__Bifidobacteriales.f__Bifidobacteriaceae.g__Bifidobacterium	OID30347	Melanotransferrin	P08582	MELTF	Cardiometabolic_II	Inverse variance weighted	6	0.0871899	0.0307656	0.00459689				3.83449	5	0.573483	rs10455532; rs12657170; rs182549; rs4472164; rs4859454; rs74452406		0.0425212462650391	removed for leave-one-out
GCST90027688	k__Bacteria.p__Actinobacteria.c__Actinobacteria.o__Bifidobacteriales.f__Bifidobacteriaceae.g__Bifidobacterium	OID30347	Melanotransferrin	P08582	MELTF	Cardiometabolic_II	MR Egger	6	0.133028	0.101056	0.258406	-0.0053888	0.0113162	0.658775	3.60772	4	0.461689	rs10455532; rs12657170; rs182549; rs4472164; rs4859454; rs74452406		NA	removed for leave-one-out
GCST90027688	k__Bacteria.p__Actinobacteria.c__Actinobacteria.o__Bifidobacteriales.f__Bifidobacteriaceae.g__Bifidobacterium	OID30347	Melanotransferrin	P08582	MELTF	Cardiometabolic_II	Weighted median	6	0.101165	0.0403173	0.0120996							rs10455532; rs12657170; rs182549; rs4472164; rs4859454; rs74452406		NA	removed for leave-one-out
GCST90027688	k__Bacteria.p__Actinobacteria.c__Actinobacteria.o__Bifidobacteriales.f__Bifidobacteriaceae.g__Bifidobacterium	OID30347	Melanotransferrin	P08582	MELTF	Cardiometabolic_II	MR-PRESSO	6	0.0871899	0.0269423	0.0230471							rs10455532; rs12657170; rs182549; rs4472164; rs4859454; rs74452406		NA	removed for leave-one-out
GCST90027688	k__Bacteria.p__Actinobacteria.c__Actinobacteria.o__Bifidobacteriales.f__Bifidobacteriaceae.g__Bifidobacterium	OID30715	Cysteine-rich secretory protein 3	P54108	CRISP3	Inflammation_II	Inverse variance weighted	6	-0.0940571	0.0310713	0.00246878				5.4068	5	0.368274	rs10455532; rs12657170; rs182549; rs4472164; rs4859454; rs74452406		0.0382138408743605	removed for leave-one-out
GCST90027688	k__Bacteria.p__Actinobacteria.c__Actinobacteria.o__Bifidobacteriales.f__Bifidobacteriaceae.g__Bifidobacterium	OID30715	Cysteine-rich secretory protein 3	P54108	CRISP3	Inflammation_II	MR Egger	6	-0.231473	0.0985755	0.0786714	0.0165931	0.0113431	0.217339	3.2669	4	0.514194	rs10455532; rs12657170; rs182549; rs4472164; rs4859454; rs74452406		NA	removed for leave-one-out
GCST90027688	k__Bacteria.p__Actinobacteria.c__Actinobacteria.o__Bifidobacteriales.f__Bifidobacteriaceae.g__Bifidobacterium	OID30715	Cysteine-rich secretory protein 3	P54108	CRISP3	Inflammation_II	Weighted median	6	-0.0855986	0.0409623	0.0366454							rs10455532; rs12657170; rs182549; rs4472164; rs4859454; rs74452406		NA	removed for leave-one-out
GCST90027688	k__Bacteria.p__Actinobacteria.c__Actinobacteria.o__Bifidobacteriales.f__Bifidobacteriaceae.g__Bifidobacterium	OID30715	Cysteine-rich secretory protein 3	P54108	CRISP3	Inflammation_II	MR-PRESSO	6	-0.0940571	0.0310713	0.0291767							rs10455532; rs12657170; rs182549; rs4472164; rs4859454; rs74452406		NA	removed for leave-one-out
GCST90027736	k__Bacteria.p__Actinobacteria.c__Actinobacteria.o__Bifidobacteriales	OID20050	Troponin I, cardiac muscle	P19429	TNNI3	Cardiometabolic	Inverse variance weighted	6	0.107026	0.0346665	0.00201989				1.95522	5	0.855305	rs10455532; rs12657170; rs182549; rs4851317; rs4859454; rs74452406		0.0373678850904717	removed for bidirectional
GCST90027736	k__Bacteria.p__Actinobacteria.c__Actinobacteria.o__Bifidobacteriales	OID20050	Troponin I, cardiac muscle	P19429	TNNI3	Cardiometabolic	MR Egger	6	0.19086	0.11058	0.159428	-0.00954595	0.0119566	0.469365	1.31781	4	0.858347	rs10455532; rs12657170; rs182549; rs4851317; rs4859454; rs74452406		NA	removed for bidirectional
GCST90027736	k__Bacteria.p__Actinobacteria.c__Actinobacteria.o__Bifidobacteriales	OID20050	Troponin I, cardiac muscle	P19429	TNNI3	Cardiometabolic	Weighted median	6	0.121318	0.0448696	0.00685533							rs10455532; rs12657170; rs182549; rs4851317; rs4859454; rs74452406		NA	removed for bidirectional
GCST90027736	k__Bacteria.p__Actinobacteria.c__Actinobacteria.o__Bifidobacteriales	OID20050	Troponin I, cardiac muscle	P19429	TNNI3	Cardiometabolic	MR-PRESSO	6	0.107026	0.0216782	0.00433323							rs10455532; rs12657170; rs182549; rs4851317; rs4859454; rs74452406		NA	removed for bidirectional
GCST90027662	k__Bacteria.p__Actinobacteria.c__Actinobacteria.o__Bifidobacteriales.f__Bifidobacteriaceae	OID20050	Troponin I, cardiac muscle	P19429	TNNI3	Cardiometabolic	Inverse variance weighted	6	0.107022	0.0346641	0.00201914				1.95455	5	0.855398	rs10455532; rs12657170; rs182549; rs4851317; rs4859454; rs74452406		0.0373678850904717	removed for bidirectional
GCST90027662	k__Bacteria.p__Actinobacteria.c__Actinobacteria.o__Bifidobacteriales.f__Bifidobacteriaceae	OID20050	Troponin I, cardiac muscle	P19429	TNNI3	Cardiometabolic	MR Egger	6	0.190749	0.110519	0.159438	-0.0095349	0.0119509	0.469646	1.318	4	0.858314	rs10455532; rs12657170; rs182549; rs4851317; rs4859454; rs74452406		NA	removed for bidirectional
GCST90027662	k__Bacteria.p__Actinobacteria.c__Actinobacteria.o__Bifidobacteriales.f__Bifidobacteriaceae	OID20050	Troponin I, cardiac muscle	P19429	TNNI3	Cardiometabolic	Weighted median	6	0.12131	0.0440257	0.00586125							rs10455532; rs12657170; rs182549; rs4851317; rs4859454; rs74452406		NA	removed for bidirectional
GCST90027662	k__Bacteria.p__Actinobacteria.c__Actinobacteria.o__Bifidobacteriales.f__Bifidobacteriaceae	OID20050	Troponin I, cardiac muscle	P19429	TNNI3	Cardiometabolic	MR-PRESSO	6	0.107022	0.021673	0.00432939							rs10455532; rs12657170; rs182549; rs4851317; rs4859454; rs74452406		NA	removed for bidirectional
GCST90027755	k__Bacteria.p__Actinobacteria.c__Actinobacteria.o__Bifidobacteriales.f__Bifidobacteriaceae.g__Bifidobacterium.s__Bifidobacterium_bifidum	OID20598	Receptor-type tyrosine-protein phosphatase mu	P28827	PTPRM	Inflammation	Inverse variance weighted	10	-0.0474684	0.0137542	0.000558098				7.43497	9	0.591929	rs11630244; rs17453521; rs4861647; rs59340188; rs62555927; rs722497; rs7334864; rs849116; rs9525230; rs9848175		0.0206496387532265	removed for bidirectional
GCST90027755	k__Bacteria.p__Actinobacteria.c__Actinobacteria.o__Bifidobacteriales.f__Bifidobacteriaceae.g__Bifidobacterium.s__Bifidobacterium_bifidum	OID20598	Receptor-type tyrosine-protein phosphatase mu	P28827	PTPRM	Inflammation	MR Egger	10	-0.0240931	0.0479643	0.628979	-0.00495991	0.00974995	0.624684	7.17618	8	0.517749	rs11630244; rs17453521; rs4861647; rs59340188; rs62555927; rs722497; rs7334864; rs849116; rs9525230; rs9848175		NA	removed for bidirectional
GCST90027755	k__Bacteria.p__Actinobacteria.c__Actinobacteria.o__Bifidobacteriales.f__Bifidobacteriaceae.g__Bifidobacterium.s__Bifidobacterium_bifidum	OID20598	Receptor-type tyrosine-protein phosphatase mu	P28827	PTPRM	Inflammation	Weighted median	10	-0.0564418	0.0189691	0.00292546							rs11630244; rs17453521; rs4861647; rs59340188; rs62555927; rs722497; rs7334864; rs849116; rs9525230; rs9848175		NA	removed for bidirectional
GCST90027755	k__Bacteria.p__Actinobacteria.c__Actinobacteria.o__Bifidobacteriales.f__Bifidobacteriaceae.g__Bifidobacterium.s__Bifidobacterium_bifidum	OID20598	Receptor-type tyrosine-protein phosphatase mu	P28827	PTPRM	Inflammation	MR-PRESSO	10	-0.0474684	0.0125012	0.0042362							rs11630244; rs17453521; rs4861647; rs59340188; rs62555927; rs722497; rs7334864; rs849116; rs9525230; rs9848175		NA	removed for bidirectional
GCST90027668	k__Bacteria.p__Bacteroidetes.c__Bacteroidia.o__Bacteroidales.f__Rikenellaceae	OID20570	Pentraxin-related protein PTX3	P26022	PTX3	Inflammation	Inverse variance weighted	3	0.166292	0.0549411	0.00247205				0.366061	2	0.832743	rs11211406; rs2465506; rs73344869		0.0459704118859807	removed for bidirectional
GCST90027668	k__Bacteria.p__Bacteroidetes.c__Bacteroidia.o__Bacteroidales.f__Rikenellaceae	OID20570	Pentraxin-related protein PTX3	P26022	PTX3	Inflammation	MR Egger	3	0.212603	0.204746	0.488017	-0.00602739	0.0256708	0.853184	0.310932	1	0.577109	rs11211406; rs2465506; rs73344869		NA	removed for bidirectional
GCST90027668	k__Bacteria.p__Bacteroidetes.c__Bacteroidia.o__Bacteroidales.f__Rikenellaceae	OID20570	Pentraxin-related protein PTX3	P26022	PTX3	Inflammation	Weighted median	3	0.156652	0.0679762	0.0211938							rs11211406; rs2465506; rs73344869		NA	removed for bidirectional
GCST90027701	k__Bacteria.p__Bacteroidetes.c__Bacteroidia.o__Bacteroidales.f__Rikenellaceae.g__Alistipes	OID20570	Pentraxin-related protein PTX3	P26022	PTX3	Inflammation	Inverse variance weighted	3	0.165738	0.0547862	0.00248489				0.375537	2	0.828807	rs11211406; rs2465506; rs73344869		0.0459704118859807	removed for bidirectional
GCST90027701	k__Bacteria.p__Bacteroidetes.c__Bacteroidia.o__Bacteroidales.f__Rikenellaceae.g__Alistipes	OID20570	Pentraxin-related protein PTX3	P26022	PTX3	Inflammation	MR Egger	3	0.211746	0.204903	0.489545	-0.0060033	0.025763	0.854256	0.321239	1	0.570864	rs11211406; rs2465506; rs73344869		NA	removed for bidirectional
GCST90027701	k__Bacteria.p__Bacteroidetes.c__Bacteroidia.o__Bacteroidales.f__Rikenellaceae.g__Alistipes	OID20570	Pentraxin-related protein PTX3	P26022	PTX3	Inflammation	Weighted median	3	0.155906	0.0735722	0.0340834							rs11211406; rs2465506; rs73344869		NA	removed for bidirectional
GCST90027488	LACTOSECAT.PWY..lactose.and.galactose.degradation.I	OID30141	MANSC domain-containing protein 4	A6NHS7	MANSC4	Cardiometabolic_II	Inverse variance weighted	8	0.061291	0.0254073	0.0158507				3.38279	7	0.84748	rs118184992; rs17034687; rs191667368; rs4960590; rs507666; rs7147611; rs80205307; rs9982657		0.20991597530629	NO
GCST90027488	LACTOSECAT.PWY..lactose.and.galactose.degradation.I	OID30683	Extracellular superoxide dismutase	P08294	SOD3	Inflammation_II	Inverse variance weighted	8	0.0617195	0.0272309	0.0234195				6.05806	7	0.532986	rs118184992; rs17034687; rs191667368; rs4960590; rs507666; rs7147611; rs80205307; rs9982657		0.217543744713315	NO
GCST90027488	LACTOSECAT.PWY..lactose.and.galactose.degradation.I	OID30772	Complement factor I	P05156	CFI	Inflammation_II	Inverse variance weighted	8	0.080922	0.0296139	0.0062843				4.23003	7	0.752934	rs118184992; rs17034687; rs191667368; rs4960590; rs507666; rs7147611; rs80205307; rs9982657		0.232519271558036	NO
GCST90027488	LACTOSECAT.PWY..lactose.and.galactose.degradation.I	OID30571	A-kinase anchor protein 12	Q02952	AKAP12	Inflammation_II	Inverse variance weighted	8	0.107723	0.0435291	0.0133336				13.5386	7	0.0600226	rs118184992; rs17034687; rs191667368; rs4960590; rs507666; rs7147611; rs80205307; rs9982657		0.232922458789111	NO
GCST90027451	ASPASN.PWY..superpathway.of.L.aspartate.and.L.asparagine.biosynthesis	OID20058	T-cell leukemia/lymphoma protein 1B	O95988	TCL1B	Cardiometabolic	MR Egger	5	-0.293114	0.524071	0.614995	0.0289952	0.0484551	0.591744	1.22335	3	0.747409	rs113902391; rs12490065; rs2846765; rs820496; rs9545502		NA	NO
GCST90027451	ASPASN.PWY..superpathway.of.L.aspartate.and.L.asparagine.biosynthesis	OID20058	T-cell leukemia/lymphoma protein 1B	O95988	TCL1B	Cardiometabolic	Inverse variance weighted	5	0.019455	0.0424672	0.646868				1.58143	4	0.812127	rs113902391; rs12490065; rs2846765; rs820496; rs9545502		0.864884085709571	NO
GCST90027451	ASPASN.PWY..superpathway.of.L.aspartate.and.L.asparagine.biosynthesis	OID20099	C-type lectin domain family 1 member A	Q8NC01	CLEC1A	Cardiometabolic	Inverse variance weighted	5	-0.0395201	0.0386552	0.306604				2.36483	4	0.668992	rs113902391; rs12490065; rs2846765; rs820496; rs9545502		0.557968717569975	NO
GCST90027451	ASPASN.PWY..superpathway.of.L.aspartate.and.L.asparagine.biosynthesis	OID20058	T-cell leukemia/lymphoma protein 1B	O95988	TCL1B	Cardiometabolic	Weighted median	5	-0.00878963	0.0523674	0.866705							rs113902391; rs12490065; rs2846765; rs820496; rs9545502		NA	NO
GCST90027451	ASPASN.PWY..superpathway.of.L.aspartate.and.L.asparagine.biosynthesis	OID20057	Microfibril-associated glycoprotein 3	P55082	MFAP3	Cardiometabolic	Weighted median	5	-0.00346427	0.0570112	0.951547							rs113902391; rs12490065; rs2846765; rs820496; rs9545502		NA	NO
GCST90027451	ASPASN.PWY..superpathway.of.L.aspartate.and.L.asparagine.biosynthesis	OID20057	Microfibril-associated glycoprotein 3	P55082	MFAP3	Cardiometabolic	MR-PRESSO	5	-0.0338474	0.0451457	0.495102							rs113902391; rs12490065; rs2846765; rs820496; rs9545502		NA	NO
GCST90027451	ASPASN.PWY..superpathway.of.L.aspartate.and.L.asparagine.biosynthesis	OID20099	C-type lectin domain family 1 member A	Q8NC01	CLEC1A	Cardiometabolic	MR Egger	5	0.0392867	0.472057	0.938915	-0.00730706	0.0436227	0.877627	2.33678	3	0.505512	rs113902391; rs12490065; rs2846765; rs820496; rs9545502		NA	NO
GCST90027451	ASPASN.PWY..superpathway.of.L.aspartate.and.L.asparagine.biosynthesis	OID20057	Microfibril-associated glycoprotein 3	P55082	MFAP3	Cardiometabolic	MR Egger	5	0.801142	0.524036	0.223785	-0.0774574	0.0484521	0.208196	1.96491	3	0.579722	rs113902391; rs12490065; rs2846765; rs820496; rs9545502		NA	NO
GCST90027451	ASPASN.PWY..superpathway.of.L.aspartate.and.L.asparagine.biosynthesis	OID20099	C-type lectin domain family 1 member A	Q8NC01	CLEC1A	Cardiometabolic	Weighted median	5	-0.00595633	0.0494398	0.904106							rs113902391; rs12490065; rs2846765; rs820496; rs9545502		NA	NO
GCST90027451	ASPASN.PWY..superpathway.of.L.aspartate.and.L.asparagine.biosynthesis	OID20058	T-cell leukemia/lymphoma protein 1B	O95988	TCL1B	Cardiometabolic	MR-PRESSO	5	0.019455	0.0267023	0.506618							rs113902391; rs12490065; rs2846765; rs820496; rs9545502		NA	NO
GCST90027451	ASPASN.PWY..superpathway.of.L.aspartate.and.L.asparagine.biosynthesis	OID20057	Microfibril-associated glycoprotein 3	P55082	MFAP3	Cardiometabolic	Inverse variance weighted	5	-0.0338474	0.0451457	0.453413				4.52056	4	0.340117	rs113902391; rs12490065; rs2846765; rs820496; rs9545502		0.729404019218437	NO
GCST90027451	ASPASN.PWY..superpathway.of.L.aspartate.and.L.asparagine.biosynthesis	OID20102	Carcinoembryonic antigen-related cell adhesion molecule 8	P31997	CEACAM8	Cardiometabolic	Weighted median	5	0.0364428	0.0539239	0.499156							rs113902391; rs12490065; rs2846765; rs820496; rs9545502		NA	NO
GCST90027451	ASPASN.PWY..superpathway.of.L.aspartate.and.L.asparagine.biosynthesis	OID20056	Thymic stromal lymphopoietin	Q969D9	TSLP	Cardiometabolic	Inverse variance weighted	5	-0.0163858	0.0505403	0.745778				5.67804	4	0.224517	rs113902391; rs12490065; rs2846765; rs820496; rs9545502		0.946388196400542	NO
GCST90027451	ASPASN.PWY..superpathway.of.L.aspartate.and.L.asparagine.biosynthesis	OID20056	Thymic stromal lymphopoietin	Q969D9	TSLP	Cardiometabolic	MR Egger	5	-0.147884	0.716125	0.849617	0.0121984	0.0662126	0.865582	5.61452	3	0.131947	rs113902391; rs12490065; rs2846765; rs820496; rs9545502		NA	NO
GCST90027451	ASPASN.PWY..superpathway.of.L.aspartate.and.L.asparagine.biosynthesis	OID20102	Carcinoembryonic antigen-related cell adhesion molecule 8	P31997	CEACAM8	Cardiometabolic	MR Egger	5	-0.40517	0.497439	0.474999	0.0413146	0.0459925	0.435231	2.1314	3	0.545586	rs113902391; rs12490065; rs2846765; rs820496; rs9545502		NA	NO
GCST90027451	ASPASN.PWY..superpathway.of.L.aspartate.and.L.asparagine.biosynthesis	OID20056	Thymic stromal lymphopoietin	Q969D9	TSLP	Cardiometabolic	MR-PRESSO	5	-0.0163858	0.0505403	0.762023							rs113902391; rs12490065; rs2846765; rs820496; rs9545502		NA	NO
GCST90027451	ASPASN.PWY..superpathway.of.L.aspartate.and.L.asparagine.biosynthesis	OID20098	Thrombopoietin	P40225	THPO	Cardiometabolic	MR Egger	5	-0.41029	0.509778	0.479787	0.0392966	0.0471338	0.465608	0.890497	3	0.82772	rs113902391; rs12490065; rs2846765; rs820496; rs9545502		NA	NO
GCST90027451	ASPASN.PWY..superpathway.of.L.aspartate.and.L.asparagine.biosynthesis	OID20098	Thrombopoietin	P40225	THPO	Cardiometabolic	Weighted median	5	0.00882255	0.0513021	0.863459							rs113902391; rs12490065; rs2846765; rs820496; rs9545502		NA	NO
GCST90027451	ASPASN.PWY..superpathway.of.L.aspartate.and.L.asparagine.biosynthesis	OID20098	Thrombopoietin	P40225	THPO	Cardiometabolic	MR-PRESSO	5	0.0133257	0.0260212	0.635553							rs113902391; rs12490065; rs2846765; rs820496; rs9545502		NA	NO
GCST90027451	ASPASN.PWY..superpathway.of.L.aspartate.and.L.asparagine.biosynthesis	OID20095	Prosaposin receptor GPR37	O15354	GPR37	Cardiometabolic	MR Egger	5	-0.281039	0.427501	0.55786	0.0274507	0.0395271	0.537332	1.11414	3	0.773661	rs113902391; rs12490065; rs2846765; rs820496; rs9545502		NA	NO
GCST90027451	ASPASN.PWY..superpathway.of.L.aspartate.and.L.asparagine.biosynthesis	OID20095	Prosaposin receptor GPR37	O15354	GPR37	Cardiometabolic	Weighted median	5	-0.00542985	0.0417863	0.896611							rs113902391; rs12490065; rs2846765; rs820496; rs9545502		NA	NO
GCST90027451	ASPASN.PWY..superpathway.of.L.aspartate.and.L.asparagine.biosynthesis	OID20095	Prosaposin receptor GPR37	O15354	GPR37	Cardiometabolic	MR-PRESSO	5	0.0148751	0.0218854	0.534005							rs113902391; rs12490065; rs2846765; rs820496; rs9545502		NA	NO
GCST90027451	ASPASN.PWY..superpathway.of.L.aspartate.and.L.asparagine.biosynthesis	OID20099	C-type lectin domain family 1 member A	Q8NC01	CLEC1A	Cardiometabolic	MR-PRESSO	5	-0.0395201	0.029722	0.25439							rs113902391; rs12490065; rs2846765; rs820496; rs9545502		NA	NO
GCST90027451	ASPASN.PWY..superpathway.of.L.aspartate.and.L.asparagine.biosynthesis	OID20059	Dual oxidase 2	Q9NRD8	DUOX2	Cardiometabolic	Inverse variance weighted	5	0.0321566	0.0424548	0.448792				1.3759	4	0.848373	rs113902391; rs12490065; rs2846765; rs820496; rs9545502		0.808097360255029	NO
GCST90027451	ASPASN.PWY..superpathway.of.L.aspartate.and.L.asparagine.biosynthesis	OID20100	Ectonucleoside triphosphate diphosphohydrolase 6	O75354	ENTPD6	Cardiometabolic	MR Egger	5	-0.244709	0.442738	0.618973	0.0260755	0.0409349	0.569407	2.43028	3	0.488024	rs113902391; rs12490065; rs2846765; rs820496; rs9545502		NA	NO
GCST90027451	ASPASN.PWY..superpathway.of.L.aspartate.and.L.asparagine.biosynthesis	OID20059	Dual oxidase 2	Q9NRD8	DUOX2	Cardiometabolic	MR Egger	5	0.552269	0.523757	0.3691	-0.0482481	0.0484264	0.392527	0.383245	3	0.943682	rs113902391; rs12490065; rs2846765; rs820496; rs9545502		NA	NO
GCST90027451	ASPASN.PWY..superpathway.of.L.aspartate.and.L.asparagine.biosynthesis	OID20059	Dual oxidase 2	Q9NRD8	DUOX2	Cardiometabolic	Weighted median	5	0.0305678	0.0537046	0.569232							rs113902391; rs12490065; rs2846765; rs820496; rs9545502		NA	NO
GCST90027451	ASPASN.PWY..superpathway.of.L.aspartate.and.L.asparagine.biosynthesis	OID20056	Thymic stromal lymphopoietin	Q969D9	TSLP	Cardiometabolic	Weighted median	5	0.0201287	0.0605485	0.739558							rs113902391; rs12490065; rs2846765; rs820496; rs9545502		NA	NO
GCST90027451	ASPASN.PWY..superpathway.of.L.aspartate.and.L.asparagine.biosynthesis	OID20087	Matrilysin	P09237	MMP7	Cardiometabolic	Weighted median	5	-0.0170773	0.0531875	0.748152							rs113902391; rs12490065; rs2846765; rs820496; rs9545502		NA	NO
GCST90027451	ASPASN.PWY..superpathway.of.L.aspartate.and.L.asparagine.biosynthesis	OID20087	Matrilysin	P09237	MMP7	Cardiometabolic	MR-PRESSO	5	-0.0136582	0.0494035	0.79589							rs113902391; rs12490065; rs2846765; rs820496; rs9545502		NA	NO
GCST90027451	ASPASN.PWY..superpathway.of.L.aspartate.and.L.asparagine.biosynthesis	OID20088	Serum paraoxonase/arylesterase 2	Q15165	PON2	Cardiometabolic	Inverse variance weighted	5	-0.0187618	0.0525103	0.72087				10.14	4	0.0381346	rs113902391; rs12490065; rs2846765; rs820496; rs9545502		0.91650805233798	NO
GCST90027451	ASPASN.PWY..superpathway.of.L.aspartate.and.L.asparagine.biosynthesis	OID20102	Carcinoembryonic antigen-related cell adhesion molecule 8	P31997	CEACAM8	Cardiometabolic	Inverse variance weighted	5	0.040204	0.0403248	0.318762				2.93833	4	0.568198	rs113902391; rs12490065; rs2846765; rs820496; rs9545502		0.73713785419048	NO
GCST90027451	ASPASN.PWY..superpathway.of.L.aspartate.and.L.asparagine.biosynthesis	OID20088	Serum paraoxonase/arylesterase 2	Q15165	PON2	Cardiometabolic	Weighted median	5	0.00587591	0.0502531	0.906918							rs113902391; rs12490065; rs2846765; rs820496; rs9545502		NA	NO
GCST90027451	ASPASN.PWY..superpathway.of.L.aspartate.and.L.asparagine.biosynthesis	OID20088	Serum paraoxonase/arylesterase 2	Q15165	PON2	Cardiometabolic	MR-PRESSO	5	-0.0187618	0.0525103	0.738923							rs113902391; rs12490065; rs2846765; rs820496; rs9545502		NA	NO
GCST90027451	ASPASN.PWY..superpathway.of.L.aspartate.and.L.asparagine.biosynthesis	OID20089	A disintegrin and metalloproteinase with thrombospondin motifs 16	Q8TE57	ADAMTS16	Cardiometabolic	Inverse variance weighted	5	0.0188916	0.0385552	0.624142				1.385	4	0.846798	rs113902391; rs12490065; rs2846765; rs820496; rs9545502		0.885508996750962	NO
GCST90027451	ASPASN.PWY..superpathway.of.L.aspartate.and.L.asparagine.biosynthesis	OID20089	A disintegrin and metalloproteinase with thrombospondin motifs 16	Q8TE57	ADAMTS16	Cardiometabolic	MR Egger	5	0.28073	0.47501	0.596093	-0.0242904	0.0439206	0.61877	1.07913	3	0.782114	rs113902391; rs12490065; rs2846765; rs820496; rs9545502		NA	NO
GCST90027451	ASPASN.PWY..superpathway.of.L.aspartate.and.L.asparagine.biosynthesis	OID20100	Ectonucleoside triphosphate diphosphohydrolase 6	O75354	ENTPD6	Cardiometabolic	Inverse variance weighted	5	0.0363866	0.035902	0.310823				2.83605	4	0.585627	rs113902391; rs12490065; rs2846765; rs820496; rs9545502		0.717834566329422	NO
GCST90027451	ASPASN.PWY..superpathway.of.L.aspartate.and.L.asparagine.biosynthesis	OID20055	Corticotropin-releasing factor receptor 1	P34998	CRHR1	Cardiometabolic	MR Egger	5	0.0846746	0.52502	0.882123	-0.00643808	0.0485438	0.902886	0.624065	3	0.890902	rs113902391; rs12490065; rs2846765; rs820496; rs9545502		NA	NO
GCST90027451	ASPASN.PWY..superpathway.of.L.aspartate.and.L.asparagine.biosynthesis	OID20055	Corticotropin-releasing factor receptor 1	P34998	CRHR1	Cardiometabolic	Weighted median	5	0.0151419	0.0495525	0.759931							rs113902391; rs12490065; rs2846765; rs820496; rs9545502		NA	NO
GCST90027451	ASPASN.PWY..superpathway.of.L.aspartate.and.L.asparagine.biosynthesis	OID20055	Corticotropin-releasing factor receptor 1	P34998	CRHR1	Cardiometabolic	MR-PRESSO	5	0.0152735	0.0170431	0.420821							rs113902391; rs12490065; rs2846765; rs820496; rs9545502		NA	NO
GCST90027451	ASPASN.PWY..superpathway.of.L.aspartate.and.L.asparagine.biosynthesis	OID20087	Matrilysin	P09237	MMP7	Cardiometabolic	MR Egger	5	-0.156437	0.698896	0.837263	0.013245	0.06462	0.850717	6.30373	3	0.0977329	rs113902391; rs12490065; rs2846765; rs820496; rs9545502		NA	NO
GCST90027451	ASPASN.PWY..superpathway.of.L.aspartate.and.L.asparagine.biosynthesis	OID20101	Interleukin-6	P05231	IL6	Cardiometabolic	Inverse variance weighted	5	0.00105353	0.0548281	0.984669				7.25924	4	0.122806	rs113902391; rs12490065; rs2846765; rs820496; rs9545502		0.984669411572093	NO
GCST90027451	ASPASN.PWY..superpathway.of.L.aspartate.and.L.asparagine.biosynthesis	OID20101	Interleukin-6	P05231	IL6	Cardiometabolic	MR Egger	5	-0.0167754	0.780917	0.98421	0.00165392	0.072204	0.983164	7.25797	3	0.0641143	rs113902391; rs12490065; rs2846765; rs820496; rs9545502		NA	NO
GCST90027451	ASPASN.PWY..superpathway.of.L.aspartate.and.L.asparagine.biosynthesis	OID20101	Interleukin-6	P05231	IL6	Cardiometabolic	Weighted median	5	0.0561937	0.053243	0.291234							rs113902391; rs12490065; rs2846765; rs820496; rs9545502		NA	NO
GCST90027451	ASPASN.PWY..superpathway.of.L.aspartate.and.L.asparagine.biosynthesis	OID20088	Serum paraoxonase/arylesterase 2	Q15165	PON2	Cardiometabolic	MR Egger	5	-1.00571	0.482961	0.12871	0.0915565	0.0446558	0.13273	4.22288	3	0.238382	rs113902391; rs12490065; rs2846765; rs820496; rs9545502		NA	NO
GCST90027451	ASPASN.PWY..superpathway.of.L.aspartate.and.L.asparagine.biosynthesis	OID20091	Wiskott-Aldrich syndrome protein family member 1	Q92558	WASF1	Cardiometabolic	MR-PRESSO	5	0.0324319	0.0636019	0.636955							rs113902391; rs12490065; rs2846765; rs820496; rs9545502		NA	NO
GCST90027451	ASPASN.PWY..superpathway.of.L.aspartate.and.L.asparagine.biosynthesis	OID20092	M-phase phosphoprotein 8	Q99549	MPHOSPH8	Cardiometabolic	Inverse variance weighted	5	0.0378367	0.0710119	0.594157				11.4983	4	0.0214997	rs113902391; rs12490065; rs2846765; rs820496; rs9545502		0.968641608081223	NO
GCST90027451	ASPASN.PWY..superpathway.of.L.aspartate.and.L.asparagine.biosynthesis	OID20092	M-phase phosphoprotein 8	Q99549	MPHOSPH8	Cardiometabolic	MR Egger	5	-0.315738	0.990881	0.770893	0.0327994	0.091617	0.744047	11.0272	3	0.0115799	rs113902391; rs12490065; rs2846765; rs820496; rs9545502		NA	NO
GCST90027451	ASPASN.PWY..superpathway.of.L.aspartate.and.L.asparagine.biosynthesis	OID20092	M-phase phosphoprotein 8	Q99549	MPHOSPH8	Cardiometabolic	Weighted median	5	-0.0365565	0.0643842	0.57018							rs113902391; rs12490065; rs2846765; rs820496; rs9545502		NA	NO
GCST90027451	ASPASN.PWY..superpathway.of.L.aspartate.and.L.asparagine.biosynthesis	OID20089	A disintegrin and metalloproteinase with thrombospondin motifs 16	Q8TE57	ADAMTS16	Cardiometabolic	Weighted median	5	0.00711093	0.0462265	0.877745							rs113902391; rs12490065; rs2846765; rs820496; rs9545502		NA	NO
GCST90027451	ASPASN.PWY..superpathway.of.L.aspartate.and.L.asparagine.biosynthesis	OID20089	A disintegrin and metalloproteinase with thrombospondin motifs 16	Q8TE57	ADAMTS16	Cardiometabolic	MR-PRESSO	5	0.0188916	0.022687	0.451841							rs113902391; rs12490065; rs2846765; rs820496; rs9545502		NA	NO
GCST90027451	ASPASN.PWY..superpathway.of.L.aspartate.and.L.asparagine.biosynthesis	OID20090	Pancreatic secretory granule membrane major glycoprotein GP2	P55259	GP2	Cardiometabolic	Inverse variance weighted	5	0.0387429	0.0377652	0.304944				0.227415	4	0.994005	rs113902391; rs12490065; rs2846765; rs820496; rs9545502		0.658391214836927	NO
GCST90027451	ASPASN.PWY..superpathway.of.L.aspartate.and.L.asparagine.biosynthesis	OID20100	Ectonucleoside triphosphate diphosphohydrolase 6	O75354	ENTPD6	Cardiometabolic	Weighted median	5	0.0470516	0.0469807	0.31658							rs113902391; rs12490065; rs2846765; rs820496; rs9545502		NA	NO
GCST90027451	ASPASN.PWY..superpathway.of.L.aspartate.and.L.asparagine.biosynthesis	OID20100	Ectonucleoside triphosphate diphosphohydrolase 6	O75354	ENTPD6	Cardiometabolic	MR-PRESSO	5	0.0363866	0.0302305	0.295089							rs113902391; rs12490065; rs2846765; rs820496; rs9545502		NA	NO
GCST90027451	ASPASN.PWY..superpathway.of.L.aspartate.and.L.asparagine.biosynthesis	OID20094	SLIT and NTRK-like protein 6	Q9H5Y7	SLITRK6	Cardiometabolic	Inverse variance weighted	5	0.0450871	0.0502554	0.369634				6.15875	4	0.187602	rs113902391; rs12490065; rs2846765; rs820496; rs9545502		0.71981439240184	NO
GCST90027451	ASPASN.PWY..superpathway.of.L.aspartate.and.L.asparagine.biosynthesis	OID20094	SLIT and NTRK-like protein 6	Q9H5Y7	SLITRK6	Cardiometabolic	MR Egger	5	0.694803	0.612235	0.338905	-0.0601738	0.0565173	0.365106	4.4698	3	0.215	rs113902391; rs12490065; rs2846765; rs820496; rs9545502		NA	NO
GCST90027451	ASPASN.PWY..superpathway.of.L.aspartate.and.L.asparagine.biosynthesis	OID20094	SLIT and NTRK-like protein 6	Q9H5Y7	SLITRK6	Cardiometabolic	Weighted median	5	0.0484927	0.0578269	0.401703							rs113902391; rs12490065; rs2846765; rs820496; rs9545502		NA	NO
GCST90027451	ASPASN.PWY..superpathway.of.L.aspartate.and.L.asparagine.biosynthesis	OID20101	Interleukin-6	P05231	IL6	Cardiometabolic	MR-PRESSO	5	0.00105353	0.0548281	0.98559							rs113902391; rs12490065; rs2846765; rs820496; rs9545502		NA	NO
GCST90027451	ASPASN.PWY..superpathway.of.L.aspartate.and.L.asparagine.biosynthesis	OID20095	Prosaposin receptor GPR37	O15354	GPR37	Cardiometabolic	Inverse variance weighted	5	0.0148751	0.0346423	0.667638				1.59644	4	0.809431	rs113902391; rs12490065; rs2846765; rs820496; rs9545502		0.82342063052977	NO
GCST90027451	ASPASN.PWY..superpathway.of.L.aspartate.and.L.asparagine.biosynthesis	OID20600	Protransforming growth factor alpha [Cleaved into: Transforming growth factor alpha	P01135	TGFA	Inflammation	Weighted median	5	0.00727852	0.0600062	0.903456							rs113902391; rs12490065; rs2846765; rs820496; rs9545502		NA	NO
GCST90027451	ASPASN.PWY..superpathway.of.L.aspartate.and.L.asparagine.biosynthesis	OID20600	Protransforming growth factor alpha [Cleaved into: Transforming growth factor alpha	P01135	TGFA	Inflammation	MR-PRESSO	5	0.00256451	0.0495021	0.961167							rs113902391; rs12490065; rs2846765; rs820496; rs9545502		NA	NO
GCST90027451	ASPASN.PWY..superpathway.of.L.aspartate.and.L.asparagine.biosynthesis	OID20601	Interleukin-5 receptor subunit alpha	Q01344	IL5RA	Inflammation	Inverse variance weighted	5	-0.0165564	0.0551315	0.763942				8.70056	4	0.0690357	rs113902391; rs12490065; rs2846765; rs820496; rs9545502		0.892922555064417	NO
GCST90027451	ASPASN.PWY..superpathway.of.L.aspartate.and.L.asparagine.biosynthesis	OID20096	Granzyme H	P20718	GZMH	Cardiometabolic	Inverse variance weighted	5	0.0249689	0.0438718	0.569265				4.712	4	0.318144	rs113902391; rs12490065; rs2846765; rs820496; rs9545502		0.970135288800064	NO
GCST90027451	ASPASN.PWY..superpathway.of.L.aspartate.and.L.asparagine.biosynthesis	OID20096	Granzyme H	P20718	GZMH	Cardiometabolic	MR Egger	5	-0.658631	0.498783	0.278378	0.063416	0.0461187	0.26281	2.82122	3	0.420019	rs113902391; rs12490065; rs2846765; rs820496; rs9545502		NA	NO
GCST90027451	ASPASN.PWY..superpathway.of.L.aspartate.and.L.asparagine.biosynthesis	OID20096	Granzyme H	P20718	GZMH	Cardiometabolic	Weighted median	5	0.0162677	0.0532802	0.760119							rs113902391; rs12490065; rs2846765; rs820496; rs9545502		NA	NO
GCST90027451	ASPASN.PWY..superpathway.of.L.aspartate.and.L.asparagine.biosynthesis	OID20096	Granzyme H	P20718	GZMH	Cardiometabolic	MR-PRESSO	5	0.0249689	0.0438718	0.5997							rs113902391; rs12490065; rs2846765; rs820496; rs9545502		NA	NO
GCST90027451	ASPASN.PWY..superpathway.of.L.aspartate.and.L.asparagine.biosynthesis	OID20097	Glycogen [starch] synthase, muscle	P13807	GYS1	Cardiometabolic	Inverse variance weighted	5	-0.0144704	0.058753	0.805457				8.20979	4	0.0841888	rs113902391; rs12490065; rs2846765; rs820496; rs9545502		0.974691672681028	NO
GCST90027451	ASPASN.PWY..superpathway.of.L.aspartate.and.L.asparagine.biosynthesis	OID20097	Glycogen [starch] synthase, muscle	P13807	GYS1	Cardiometabolic	MR Egger	5	-0.55913	0.77545	0.522995	0.050527	0.0717003	0.53178	7.04381	3	0.0705146	rs113902391; rs12490065; rs2846765; rs820496; rs9545502		NA	NO
GCST90027451	ASPASN.PWY..superpathway.of.L.aspartate.and.L.asparagine.biosynthesis	OID20097	Glycogen [starch] synthase, muscle	P13807	GYS1	Cardiometabolic	Weighted median	5	-0.0798033	0.0539954	0.139417							rs113902391; rs12490065; rs2846765; rs820496; rs9545502		NA	NO
GCST90027451	ASPASN.PWY..superpathway.of.L.aspartate.and.L.asparagine.biosynthesis	OID20097	Glycogen [starch] synthase, muscle	P13807	GYS1	Cardiometabolic	MR-PRESSO	5	-0.0144704	0.058753	0.817579							rs113902391; rs12490065; rs2846765; rs820496; rs9545502		NA	NO
GCST90027451	ASPASN.PWY..superpathway.of.L.aspartate.and.L.asparagine.biosynthesis	OID20098	Thrombopoietin	P40225	THPO	Cardiometabolic	Inverse variance weighted	5	0.0133257	0.0413296	0.747131				1.5856	4	0.811379	rs113902391; rs12490065; rs2846765; rs820496; rs9545502		0.874821692796676	NO
GCST90027451	ASPASN.PWY..superpathway.of.L.aspartate.and.L.asparagine.biosynthesis	OID20584	T-cell surface glycoprotein CD4	P01730	CD4	Inflammation	Weighted median	5	-0.037074	0.0550928	0.500987							rs113902391; rs12490065; rs2846765; rs820496; rs9545502		NA	NO
GCST90027451	ASPASN.PWY..superpathway.of.L.aspartate.and.L.asparagine.biosynthesis	OID20584	T-cell surface glycoprotein CD4	P01730	CD4	Inflammation	MR-PRESSO	5	-0.0248012	0.0490157	0.639479							rs113902391; rs12490065; rs2846765; rs820496; rs9545502		NA	NO
GCST90027451	ASPASN.PWY..superpathway.of.L.aspartate.and.L.asparagine.biosynthesis	OID20585	Interleukin-17 receptor B	Q9NRM6	IL17RB	Inflammation	Inverse variance weighted	5	-0.0556902	0.0380614	0.143422				5.1182	4	0.275383	rs113902391; rs12490065; rs2846765; rs820496; rs9545502		0.896861916421392	NO
GCST90027451	ASPASN.PWY..superpathway.of.L.aspartate.and.L.asparagine.biosynthesis	OID20585	Interleukin-17 receptor B	Q9NRM6	IL17RB	Inflammation	MR Egger	5	0.200086	0.507061	0.719518	-0.0236693	0.0467602	0.647582	4.71546	3	0.193858	rs113902391; rs12490065; rs2846765; rs820496; rs9545502		NA	NO
GCST90027451	ASPASN.PWY..superpathway.of.L.aspartate.and.L.asparagine.biosynthesis	OID20585	Interleukin-17 receptor B	Q9NRM6	IL17RB	Inflammation	Weighted median	5	-0.0436178	0.0432614	0.31334							rs113902391; rs12490065; rs2846765; rs820496; rs9545502		NA	NO
GCST90027451	ASPASN.PWY..superpathway.of.L.aspartate.and.L.asparagine.biosynthesis	OID20585	Interleukin-17 receptor B	Q9NRM6	IL17RB	Inflammation	MR-PRESSO	5	-0.0556902	0.0380614	0.217255							rs113902391; rs12490065; rs2846765; rs820496; rs9545502		NA	NO
GCST90027451	ASPASN.PWY..superpathway.of.L.aspartate.and.L.asparagine.biosynthesis	OID20586	Lymphotoxin-alpha	P01374	LTA	Inflammation	Inverse variance weighted	5	-0.00212064	0.0340154	0.950289				3.50678	4	0.476847	rs113902391; rs12490065; rs2846765; rs820496; rs9545502		0.950289385057487	NO
GCST90027451	ASPASN.PWY..superpathway.of.L.aspartate.and.L.asparagine.biosynthesis	OID20586	Lymphotoxin-alpha	P01374	LTA	Inflammation	MR Egger	5	0.132961	0.447124	0.785587	-0.0125312	0.0413423	0.78161	3.40258	3	0.333619	rs113902391; rs12490065; rs2846765; rs820496; rs9545502		NA	NO
GCST90027451	ASPASN.PWY..superpathway.of.L.aspartate.and.L.asparagine.biosynthesis	OID20090	Pancreatic secretory granule membrane major glycoprotein GP2	P55259	GP2	Cardiometabolic	MR Egger	5	-0.0146404	0.45706	0.976459	0.00494769	0.0422166	0.914109	0.213679	3	0.975351	rs113902391; rs12490065; rs2846765; rs820496; rs9545502		NA	NO
GCST90027451	ASPASN.PWY..superpathway.of.L.aspartate.and.L.asparagine.biosynthesis	OID20090	Pancreatic secretory granule membrane major glycoprotein GP2	P55259	GP2	Cardiometabolic	Weighted median	5	0.0501152	0.0472348	0.288699							rs113902391; rs12490065; rs2846765; rs820496; rs9545502		NA	NO
GCST90027451	ASPASN.PWY..superpathway.of.L.aspartate.and.L.asparagine.biosynthesis	OID20090	Pancreatic secretory granule membrane major glycoprotein GP2	P55259	GP2	Cardiometabolic	MR-PRESSO	5	0.0387429	0.00900474	0.0126207							rs113902391; rs12490065; rs2846765; rs820496; rs9545502		NA	NO
GCST90027451	ASPASN.PWY..superpathway.of.L.aspartate.and.L.asparagine.biosynthesis	OID20091	Wiskott-Aldrich syndrome protein family member 1	Q92558	WASF1	Cardiometabolic	Inverse variance weighted	5	0.0324319	0.0636019	0.610108				9.80697	4	0.0438078	rs113902391; rs12490065; rs2846765; rs820496; rs9545502		0.997540778090286	NO
GCST90027451	ASPASN.PWY..superpathway.of.L.aspartate.and.L.asparagine.biosynthesis	OID20091	Wiskott-Aldrich syndrome protein family member 1	Q92558	WASF1	Cardiometabolic	MR Egger	5	-0.499732	0.852124	0.598778	0.0493663	0.0787874	0.575376	8.6721	3	0.0339837	rs113902391; rs12490065; rs2846765; rs820496; rs9545502		NA	NO
GCST90027451	ASPASN.PWY..superpathway.of.L.aspartate.and.L.asparagine.biosynthesis	OID20091	Wiskott-Aldrich syndrome protein family member 1	Q92558	WASF1	Cardiometabolic	Weighted median	5	-0.0359051	0.0605524	0.553208							rs113902391; rs12490065; rs2846765; rs820496; rs9545502		NA	NO
GCST90027451	ASPASN.PWY..superpathway.of.L.aspartate.and.L.asparagine.biosynthesis	OID20588	Methylated-DNA--protein-cysteine methyltransferase	P16455	MGMT	Inflammation	Inverse variance weighted	5	0.0172308	0.0591182	0.770697				9.16749	4	0.0570466	rs113902391; rs12490065; rs2846765; rs820496; rs9545502		0.968357414480738	NO
GCST90027451	ASPASN.PWY..superpathway.of.L.aspartate.and.L.asparagine.biosynthesis	OID20588	Methylated-DNA--protein-cysteine methyltransferase	P16455	MGMT	Inflammation	MR Egger	5	-0.659057	0.745917	0.442006	0.0627371	0.0689689	0.430076	7.18559	3	0.0662119	rs113902391; rs12490065; rs2846765; rs820496; rs9545502		NA	NO
GCST90027451	ASPASN.PWY..superpathway.of.L.aspartate.and.L.asparagine.biosynthesis	OID20588	Methylated-DNA--protein-cysteine methyltransferase	P16455	MGMT	Inflammation	Weighted median	5	-0.0150419	0.062502	0.809817							rs113902391; rs12490065; rs2846765; rs820496; rs9545502		NA	NO
GCST90027451	ASPASN.PWY..superpathway.of.L.aspartate.and.L.asparagine.biosynthesis	OID20588	Methylated-DNA--protein-cysteine methyltransferase	P16455	MGMT	Inflammation	MR-PRESSO	5	0.0172308	0.0591182	0.785187							rs113902391; rs12490065; rs2846765; rs820496; rs9545502		NA	NO
GCST90027451	ASPASN.PWY..superpathway.of.L.aspartate.and.L.asparagine.biosynthesis	OID20092	M-phase phosphoprotein 8	Q99549	MPHOSPH8	Cardiometabolic	MR-PRESSO	5	0.0378367	0.0710119	0.622383							rs113902391; rs12490065; rs2846765; rs820496; rs9545502		NA	NO
GCST90027451	ASPASN.PWY..superpathway.of.L.aspartate.and.L.asparagine.biosynthesis	OID20093	DnaJ homolog subfamily B member 8	Q8NHS0	DNAJB8	Cardiometabolic	Inverse variance weighted	5	-0.0368702	0.0501506	0.462225				5.6457	4	0.227216	rs113902391; rs12490065; rs2846765; rs820496; rs9545502		0.921356216837869	NO
GCST90027451	ASPASN.PWY..superpathway.of.L.aspartate.and.L.asparagine.biosynthesis	OID20093	DnaJ homolog subfamily B member 8	Q8NHS0	DNAJB8	Cardiometabolic	MR Egger	5	-0.0849879	0.713911	0.912763	0.00446373	0.0660093	0.950341	5.63711	3	0.130664	rs113902391; rs12490065; rs2846765; rs820496; rs9545502		NA	NO
GCST90027451	ASPASN.PWY..superpathway.of.L.aspartate.and.L.asparagine.biosynthesis	OID20093	DnaJ homolog subfamily B member 8	Q8NHS0	DNAJB8	Cardiometabolic	Weighted median	5	-0.0579553	0.059854	0.332906							rs113902391; rs12490065; rs2846765; rs820496; rs9545502		NA	NO
GCST90027451	ASPASN.PWY..superpathway.of.L.aspartate.and.L.asparagine.biosynthesis	OID20093	DnaJ homolog subfamily B member 8	Q8NHS0	DNAJB8	Cardiometabolic	MR-PRESSO	5	-0.0368702	0.0501506	0.503003							rs113902391; rs12490065; rs2846765; rs820496; rs9545502		NA	NO
GCST90027451	ASPASN.PWY..superpathway.of.L.aspartate.and.L.asparagine.biosynthesis	OID20590	C-type lectin domain family 4 member G	Q6UXB4	CLEC4G	Inflammation	MR Egger	5	-0.238404	0.539262	0.68835	0.0181802	0.0498505	0.739532	3.60169	3	0.307811	rs113902391; rs12490065; rs2846765; rs820496; rs9545502		NA	NO
GCST90027451	ASPASN.PWY..superpathway.of.L.aspartate.and.L.asparagine.biosynthesis	OID20590	C-type lectin domain family 4 member G	Q6UXB4	CLEC4G	Inflammation	Weighted median	5	-0.050415	0.0540803	0.351221							rs113902391; rs12490065; rs2846765; rs820496; rs9545502		NA	NO
GCST90027451	ASPASN.PWY..superpathway.of.L.aspartate.and.L.asparagine.biosynthesis	OID20590	C-type lectin domain family 4 member G	Q6UXB4	CLEC4G	Inflammation	MR-PRESSO	5	-0.0423907	0.0388244	0.336252							rs113902391; rs12490065; rs2846765; rs820496; rs9545502		NA	NO
GCST90027451	ASPASN.PWY..superpathway.of.L.aspartate.and.L.asparagine.biosynthesis	OID20094	SLIT and NTRK-like protein 6	Q9H5Y7	SLITRK6	Cardiometabolic	MR-PRESSO	5	0.0450871	0.0502554	0.420351							rs113902391; rs12490065; rs2846765; rs820496; rs9545502		NA	NO
GCST90027451	ASPASN.PWY..superpathway.of.L.aspartate.and.L.asparagine.biosynthesis	OID20600	Protransforming growth factor alpha [Cleaved into: Transforming growth factor alpha	P01135	TGFA	Inflammation	MR Egger	5	-0.240045	0.691286	0.75134	0.0225059	0.063917	0.748037	5.58447	3	0.133673	rs113902391; rs12490065; rs2846765; rs820496; rs9545502		NA	NO
GCST90027451	ASPASN.PWY..superpathway.of.L.aspartate.and.L.asparagine.biosynthesis	OID20064	Serpin B5	P36952	SERPINB5	Cardiometabolic	Weighted median	5	0.00318989	0.0525142	0.951564							rs113902391; rs12490065; rs2846765; rs820496; rs9545502		NA	NO
GCST90027451	ASPASN.PWY..superpathway.of.L.aspartate.and.L.asparagine.biosynthesis	OID20064	Serpin B5	P36952	SERPINB5	Cardiometabolic	MR-PRESSO	5	0.0171761	0.0326933	0.6271							rs113902391; rs12490065; rs2846765; rs820496; rs9545502		NA	NO
GCST90027451	ASPASN.PWY..superpathway.of.L.aspartate.and.L.asparagine.biosynthesis	OID20065	Hexokinase-2	P52789	HK2	Cardiometabolic	Inverse variance weighted	5	-0.0258513	0.0425209	0.543209				1.07576	4	0.898099	rs113902391; rs12490065; rs2846765; rs820496; rs9545502		0.890868667056845	NO
GCST90027451	ASPASN.PWY..superpathway.of.L.aspartate.and.L.asparagine.biosynthesis	OID20601	Interleukin-5 receptor subunit alpha	Q01344	IL5RA	Inflammation	MR Egger	5	0.485205	0.72015	0.548732	-0.0464996	0.0665136	0.534817	7.4817	3	0.0580306	rs113902391; rs12490065; rs2846765; rs820496; rs9545502		NA	NO
GCST90027451	ASPASN.PWY..superpathway.of.L.aspartate.and.L.asparagine.biosynthesis	OID20601	Interleukin-5 receptor subunit alpha	Q01344	IL5RA	Inflammation	Weighted median	5	-0.0603188	0.0510716	0.237578							rs113902391; rs12490065; rs2846765; rs820496; rs9545502		NA	NO
GCST90027451	ASPASN.PWY..superpathway.of.L.aspartate.and.L.asparagine.biosynthesis	OID20601	Interleukin-5 receptor subunit alpha	Q01344	IL5RA	Inflammation	MR-PRESSO	5	-0.0165564	0.0551315	0.778903							rs113902391; rs12490065; rs2846765; rs820496; rs9545502		NA	NO
GCST90027451	ASPASN.PWY..superpathway.of.L.aspartate.and.L.asparagine.biosynthesis	OID20602	SLAM family member 7	Q9NQ25	SLAMF7	Inflammation	Inverse variance weighted	5	0.00913075	0.0471931	0.846586				6.50352	4	0.164569	rs113902391; rs12490065; rs2846765; rs820496; rs9545502		0.904203355997582	NO
GCST90027451	ASPASN.PWY..superpathway.of.L.aspartate.and.L.asparagine.biosynthesis	OID20602	SLAM family member 7	Q9NQ25	SLAMF7	Inflammation	MR Egger	5	0.537379	0.598523	0.435436	-0.0490014	0.0553376	0.441105	5.15592	3	0.16073	rs113902391; rs12490065; rs2846765; rs820496; rs9545502		NA	NO
GCST90027451	ASPASN.PWY..superpathway.of.L.aspartate.and.L.asparagine.biosynthesis	OID20602	SLAM family member 7	Q9NQ25	SLAMF7	Inflammation	Weighted median	5	-0.0168672	0.0536194	0.753087							rs113902391; rs12490065; rs2846765; rs820496; rs9545502		NA	NO
GCST90027451	ASPASN.PWY..superpathway.of.L.aspartate.and.L.asparagine.biosynthesis	OID20602	SLAM family member 7	Q9NQ25	SLAMF7	Inflammation	MR-PRESSO	5	0.00913075	0.0471931	0.856013							rs113902391; rs12490065; rs2846765; rs820496; rs9545502		NA	NO
GCST90027451	ASPASN.PWY..superpathway.of.L.aspartate.and.L.asparagine.biosynthesis	OID20603	OX-2 membrane glycoprotein	P41217	CD200	Inflammation	Inverse variance weighted	5	-0.0275861	0.0613835	0.653139				9.48101	4	0.0501389	rs113902391; rs12490065; rs2846765; rs820496; rs9545502		0.953178546826058	NO
GCST90027451	ASPASN.PWY..superpathway.of.L.aspartate.and.L.asparagine.biosynthesis	OID20603	OX-2 membrane glycoprotein	P41217	CD200	Inflammation	MR Egger	5	0.459918	0.825194	0.616175	-0.0452145	0.076281	0.595069	8.48707	3	0.0369482	rs113902391; rs12490065; rs2846765; rs820496; rs9545502		NA	NO
GCST90027451	ASPASN.PWY..superpathway.of.L.aspartate.and.L.asparagine.biosynthesis	OID20603	OX-2 membrane glycoprotein	P41217	CD200	Inflammation	Weighted median	5	-0.0249294	0.0585989	0.670527							rs113902391; rs12490065; rs2846765; rs820496; rs9545502		NA	NO
GCST90027451	ASPASN.PWY..superpathway.of.L.aspartate.and.L.asparagine.biosynthesis	OID20603	OX-2 membrane glycoprotein	P41217	CD200	Inflammation	MR-PRESSO	5	-0.0275861	0.0613835	0.676414							rs113902391; rs12490065; rs2846765; rs820496; rs9545502		NA	NO
GCST90027451	ASPASN.PWY..superpathway.of.L.aspartate.and.L.asparagine.biosynthesis	OID20604	Granzyme B	P10144	GZMB	Inflammation	Inverse variance weighted	5	0.00448156	0.0726767	0.95083				14.0396	4	0.00716961	rs113902391; rs12490065; rs2846765; rs820496; rs9545502		0.95083015648815	NO
GCST90027451	ASPASN.PWY..superpathway.of.L.aspartate.and.L.asparagine.biosynthesis	OID20604	Granzyme B	P10144	GZMB	Inflammation	MR Egger	5	-0.553209	0.983982	0.61324	0.0517347	0.0909797	0.609384	12.6736	3	0.00539829	rs113902391; rs12490065; rs2846765; rs820496; rs9545502		NA	NO
GCST90027451	ASPASN.PWY..superpathway.of.L.aspartate.and.L.asparagine.biosynthesis	OID20604	Granzyme B	P10144	GZMB	Inflammation	Weighted median	5	0.0932928	0.0599379	0.119591							rs113902391; rs12490065; rs2846765; rs820496; rs9545502		NA	NO
GCST90027451	ASPASN.PWY..superpathway.of.L.aspartate.and.L.asparagine.biosynthesis	OID20604	Granzyme B	P10144	GZMB	Inflammation	MR-PRESSO	4	0.00448156	0.0726767	0.953788							rs113902391; rs2846765; rs820496; rs9545502		NA	NO
GCST90027451	ASPASN.PWY..superpathway.of.L.aspartate.and.L.asparagine.biosynthesis	OID20605	Interleukin-32	P24001	IL32	Inflammation	Inverse variance weighted	5	-0.0745129	0.0396787	0.0603939				1.93691	4	0.747362	rs113902391; rs12490065; rs2846765; rs820496; rs9545502		0.562142137487122	NO
GCST90027451	ASPASN.PWY..superpathway.of.L.aspartate.and.L.asparagine.biosynthesis	OID20605	Interleukin-32	P24001	IL32	Inflammation	MR Egger	5	0.0920704	0.48967	0.862856	-0.0154533	0.0452756	0.755372	1.82041	3	0.610503	rs113902391; rs12490065; rs2846765; rs820496; rs9545502		NA	NO
GCST90027451	ASPASN.PWY..superpathway.of.L.aspartate.and.L.asparagine.biosynthesis	OID20586	Lymphotoxin-alpha	P01374	LTA	Inflammation	Weighted median	5	-0.0111621	0.0423105	0.791924							rs113902391; rs12490065; rs2846765; rs820496; rs9545502		NA	NO
GCST90027451	ASPASN.PWY..superpathway.of.L.aspartate.and.L.asparagine.biosynthesis	OID20586	Lymphotoxin-alpha	P01374	LTA	Inflammation	MR-PRESSO	5	-0.00212064	0.0318493	0.950109							rs113902391; rs12490065; rs2846765; rs820496; rs9545502		NA	NO
GCST90027451	ASPASN.PWY..superpathway.of.L.aspartate.and.L.asparagine.biosynthesis	OID20587	Phosphoinositide 3-kinase adapter protein 1	Q6ZUJ8	PIK3AP1	Inflammation	Inverse variance weighted	5	-0.0209277	0.0514127	0.683969				6.69197	4	0.153089	rs113902391; rs12490065; rs2846765; rs820496; rs9545502		0.970105791672786	NO
GCST90027451	ASPASN.PWY..superpathway.of.L.aspartate.and.L.asparagine.biosynthesis	OID20587	Phosphoinositide 3-kinase adapter protein 1	Q6ZUJ8	PIK3AP1	Inflammation	MR Egger	5	-0.686618	0.622693	0.350692	0.0617503	0.0575718	0.362066	4.83707	3	0.184124	rs113902391; rs12490065; rs2846765; rs820496; rs9545502		NA	NO
GCST90027451	ASPASN.PWY..superpathway.of.L.aspartate.and.L.asparagine.biosynthesis	OID20587	Phosphoinositide 3-kinase adapter protein 1	Q6ZUJ8	PIK3AP1	Inflammation	Weighted median	5	-0.0367748	0.058649	0.530638							rs113902391; rs12490065; rs2846765; rs820496; rs9545502		NA	NO
GCST90027451	ASPASN.PWY..superpathway.of.L.aspartate.and.L.asparagine.biosynthesis	OID20587	Phosphoinositide 3-kinase adapter protein 1	Q6ZUJ8	PIK3AP1	Inflammation	MR-PRESSO	5	-0.0209277	0.0514127	0.704809							rs113902391; rs12490065; rs2846765; rs820496; rs9545502		NA	NO
GCST90027451	ASPASN.PWY..superpathway.of.L.aspartate.and.L.asparagine.biosynthesis	OID20061	Cardiotrophin-1	Q16619	CTF1	Cardiometabolic	Inverse variance weighted	5	0.0683477	0.0468807	0.144866				4.96911	4	0.290482	rs113902391; rs12490065; rs2846765; rs820496; rs9545502		0.737443352053681	NO
GCST90027451	ASPASN.PWY..superpathway.of.L.aspartate.and.L.asparagine.biosynthesis	OID20061	Cardiotrophin-1	Q16619	CTF1	Cardiometabolic	MR Egger	5	-0.482813	0.5866	0.470796	0.0511286	0.0542371	0.415386	3.83354	3	0.280009	rs113902391; rs12490065; rs2846765; rs820496; rs9545502		NA	NO
GCST90027451	ASPASN.PWY..superpathway.of.L.aspartate.and.L.asparagine.biosynthesis	OID20061	Cardiotrophin-1	Q16619	CTF1	Cardiometabolic	Weighted median	5	0.131568	0.0586203	0.0248061							rs113902391; rs12490065; rs2846765; rs820496; rs9545502		NA	NO
GCST90027451	ASPASN.PWY..superpathway.of.L.aspartate.and.L.asparagine.biosynthesis	OID20061	Cardiotrophin-1	Q16619	CTF1	Cardiometabolic	MR-PRESSO	5	0.0683477	0.0468807	0.218609							rs113902391; rs12490065; rs2846765; rs820496; rs9545502		NA	NO
GCST90027451	ASPASN.PWY..superpathway.of.L.aspartate.and.L.asparagine.biosynthesis	OID20589	Protein HEXIM1	O94992	HEXIM1	Inflammation	Inverse variance weighted	5	0.0220736	0.06159	0.720047				9.19641	4	0.0563734	rs113902391; rs12490065; rs2846765; rs820496; rs9545502		0.927280752866643	NO
GCST90027451	ASPASN.PWY..superpathway.of.L.aspartate.and.L.asparagine.biosynthesis	OID20589	Protein HEXIM1	O94992	HEXIM1	Inflammation	MR Egger	5	-0.740543	0.75781	0.400531	0.0707424	0.0700651	0.387024	6.86397	3	0.0763623	rs113902391; rs12490065; rs2846765; rs820496; rs9545502		NA	NO
GCST90027451	ASPASN.PWY..superpathway.of.L.aspartate.and.L.asparagine.biosynthesis	OID20589	Protein HEXIM1	O94992	HEXIM1	Inflammation	Weighted median	5	0.00738663	0.063686	0.907664							rs113902391; rs12490065; rs2846765; rs820496; rs9545502		NA	NO
GCST90027451	ASPASN.PWY..superpathway.of.L.aspartate.and.L.asparagine.biosynthesis	OID20589	Protein HEXIM1	O94992	HEXIM1	Inflammation	MR-PRESSO	5	0.0220736	0.06159	0.738161							rs113902391; rs12490065; rs2846765; rs820496; rs9545502		NA	NO
GCST90027451	ASPASN.PWY..superpathway.of.L.aspartate.and.L.asparagine.biosynthesis	OID20590	C-type lectin domain family 4 member G	Q6UXB4	CLEC4G	Inflammation	Inverse variance weighted	5	-0.0423907	0.040037	0.289697				3.76137	4	0.439263	rs113902391; rs12490065; rs2846765; rs820496; rs9545502		0.642665992665503	NO
GCST90027451	ASPASN.PWY..superpathway.of.L.aspartate.and.L.asparagine.biosynthesis	OID20063	Heme-binding protein 1	Q9NRV9	HEBP1	Cardiometabolic	MR Egger	5	0.118597	0.540087	0.840284	-0.0146084	0.0499387	0.788949	3.2079	3	0.360668	rs113902391; rs12490065; rs2846765; rs820496; rs9545502		NA	NO
GCST90027451	ASPASN.PWY..superpathway.of.L.aspartate.and.L.asparagine.biosynthesis	OID20063	Heme-binding protein 1	Q9NRV9	HEBP1	Cardiometabolic	Weighted median	5	-0.0476473	0.0541271	0.378704							rs113902391; rs12490065; rs2846765; rs820496; rs9545502		NA	NO
GCST90027451	ASPASN.PWY..superpathway.of.L.aspartate.and.L.asparagine.biosynthesis	OID20063	Heme-binding protein 1	Q9NRV9	HEBP1	Cardiometabolic	MR-PRESSO	5	-0.0388734	0.0384352	0.369034							rs113902391; rs12490065; rs2846765; rs820496; rs9545502		NA	NO
GCST90027451	ASPASN.PWY..superpathway.of.L.aspartate.and.L.asparagine.biosynthesis	OID20064	Serpin B5	P36952	SERPINB5	Cardiometabolic	Inverse variance weighted	5	0.0171761	0.0424509	0.685763				2.37248	4	0.667606	rs113902391; rs12490065; rs2846765; rs820496; rs9545502		0.944468659661366	NO
GCST90027451	ASPASN.PWY..superpathway.of.L.aspartate.and.L.asparagine.biosynthesis	OID20064	Serpin B5	P36952	SERPINB5	Cardiometabolic	MR Egger	5	-0.328174	0.52391	0.57548	0.0320377	0.0484427	0.555644	1.93509	3	0.585987	rs113902391; rs12490065; rs2846765; rs820496; rs9545502		NA	NO
GCST90027451	ASPASN.PWY..superpathway.of.L.aspartate.and.L.asparagine.biosynthesis	OID20074	Tumor necrosis factor	P01375	TNF	Cardiometabolic	Weighted median	5	0.00208572	0.0516885	0.967813							rs113902391; rs12490065; rs2846765; rs820496; rs9545502		NA	NO
GCST90027451	ASPASN.PWY..superpathway.of.L.aspartate.and.L.asparagine.biosynthesis	OID20074	Tumor necrosis factor	P01375	TNF	Cardiometabolic	MR-PRESSO	5	0.0203192	0.019255	0.350824							rs113902391; rs12490065; rs2846765; rs820496; rs9545502		NA	NO
GCST90027451	ASPASN.PWY..superpathway.of.L.aspartate.and.L.asparagine.biosynthesis	OID20075	Carbonic anhydrase 5A, mitochondrial	P35218	CA5A	Cardiometabolic	Inverse variance weighted	5	0.0136942	0.047058	0.771047				6.92495	4	0.139908	rs113902391; rs12490065; rs2846765; rs820496; rs9545502		0.91384008636886	NO
GCST90027451	ASPASN.PWY..superpathway.of.L.aspartate.and.L.asparagine.biosynthesis	OID20065	Hexokinase-2	P52789	HK2	Cardiometabolic	MR Egger	5	-0.331396	0.524744	0.572528	0.0283446	0.0485189	0.600115	0.734476	3	0.865066	rs113902391; rs12490065; rs2846765; rs820496; rs9545502		NA	NO
GCST90027451	ASPASN.PWY..superpathway.of.L.aspartate.and.L.asparagine.biosynthesis	OID20065	Hexokinase-2	P52789	HK2	Cardiometabolic	Weighted median	5	-0.0347152	0.0523344	0.507117							rs113902391; rs12490065; rs2846765; rs820496; rs9545502		NA	NO
GCST90027451	ASPASN.PWY..superpathway.of.L.aspartate.and.L.asparagine.biosynthesis	OID20065	Hexokinase-2	P52789	HK2	Cardiometabolic	MR-PRESSO	5	-0.0258513	0.0220511	0.306118							rs113902391; rs12490065; rs2846765; rs820496; rs9545502		NA	NO
GCST90027451	ASPASN.PWY..superpathway.of.L.aspartate.and.L.asparagine.biosynthesis	OID20066	G protein-coupled receptor kinase 5	P34947	GRK5	Cardiometabolic	Inverse variance weighted	5	0.0852092	0.0490982	0.0826551				5.46345	4	0.242961	rs113902391; rs12490065; rs2846765; rs820496; rs9545502		0.641550338547514	NO
GCST90027451	ASPASN.PWY..superpathway.of.L.aspartate.and.L.asparagine.biosynthesis	OID20066	G protein-coupled receptor kinase 5	P34947	GRK5	Cardiometabolic	MR Egger	5	0.226449	0.69477	0.765886	-0.0131022	0.0642389	0.851436	5.38873	3	0.145447	rs113902391; rs12490065; rs2846765; rs820496; rs9545502		NA	NO
GCST90027451	ASPASN.PWY..superpathway.of.L.aspartate.and.L.asparagine.biosynthesis	OID20066	G protein-coupled receptor kinase 5	P34947	GRK5	Cardiometabolic	Weighted median	5	0.0525055	0.059479	0.377367							rs113902391; rs12490065; rs2846765; rs820496; rs9545502		NA	NO
GCST90027451	ASPASN.PWY..superpathway.of.L.aspartate.and.L.asparagine.biosynthesis	OID20066	G protein-coupled receptor kinase 5	P34947	GRK5	Cardiometabolic	MR-PRESSO	5	0.0852092	0.0490982	0.157668							rs113902391; rs12490065; rs2846765; rs820496; rs9545502		NA	NO
GCST90027451	ASPASN.PWY..superpathway.of.L.aspartate.and.L.asparagine.biosynthesis	OID20067	V-set and transmembrane domain-containing protein 2-like protein	Q96N03	VSTM2L	Cardiometabolic	Inverse variance weighted	5	0.0602865	0.0551603	0.274423				6.84466	4	0.144328	rs113902391; rs12490065; rs2846765; rs820496; rs9545502		0.923867686954335	NO
GCST90027451	ASPASN.PWY..superpathway.of.L.aspartate.and.L.asparagine.biosynthesis	OID20067	V-set and transmembrane domain-containing protein 2-like protein	Q96N03	VSTM2L	Cardiometabolic	MR Egger	5	-0.274569	0.761712	0.742387	0.0310639	0.0704303	0.689021	6.42785	3	0.0925516	rs113902391; rs12490065; rs2846765; rs820496; rs9545502		NA	NO
GCST90027451	ASPASN.PWY..superpathway.of.L.aspartate.and.L.asparagine.biosynthesis	OID20067	V-set and transmembrane domain-containing protein 2-like protein	Q96N03	VSTM2L	Cardiometabolic	Weighted median	5	0.0363444	0.0581414	0.531904							rs113902391; rs12490065; rs2846765; rs820496; rs9545502		NA	NO
GCST90027451	ASPASN.PWY..superpathway.of.L.aspartate.and.L.asparagine.biosynthesis	OID20067	V-set and transmembrane domain-containing protein 2-like protein	Q96N03	VSTM2L	Cardiometabolic	MR-PRESSO	5	0.0602865	0.0551603	0.335832							rs113902391; rs12490065; rs2846765; rs820496; rs9545502		NA	NO
GCST90027451	ASPASN.PWY..superpathway.of.L.aspartate.and.L.asparagine.biosynthesis	OID20068	Nucleolysin TIA-1 isoform p40	P31483	TIA1	Cardiometabolic	Inverse variance weighted	5	0.0345205	0.0632469	0.585199				9.0618	4	0.0595733	rs113902391; rs12490065; rs2846765; rs820496; rs9545502		0.930270434762194	NO
GCST90027451	ASPASN.PWY..superpathway.of.L.aspartate.and.L.asparagine.biosynthesis	OID20068	Nucleolysin TIA-1 isoform p40	P31483	TIA1	Cardiometabolic	MR Egger	5	-0.352629	0.872525	0.71319	0.0359145	0.0806747	0.686354	8.50026	3	0.0367288	rs113902391; rs12490065; rs2846765; rs820496; rs9545502		NA	NO
GCST90027451	ASPASN.PWY..superpathway.of.L.aspartate.and.L.asparagine.biosynthesis	OID20068	Nucleolysin TIA-1 isoform p40	P31483	TIA1	Cardiometabolic	Weighted median	5	-0.034565	0.0618222	0.576091							rs113902391; rs12490065; rs2846765; rs820496; rs9545502		NA	NO
GCST90027451	ASPASN.PWY..superpathway.of.L.aspartate.and.L.asparagine.biosynthesis	OID20068	Nucleolysin TIA-1 isoform p40	P31483	TIA1	Cardiometabolic	MR-PRESSO	5	0.0345205	0.0632469	0.614211							rs113902391; rs12490065; rs2846765; rs820496; rs9545502		NA	NO
GCST90027451	ASPASN.PWY..superpathway.of.L.aspartate.and.L.asparagine.biosynthesis	OID20069	Protein canopy homolog 2	Q9Y2B0	CNPY2	Cardiometabolic	Inverse variance weighted	5	-0.0249643	0.042303	0.555103				1.81985	4	0.76885	rs113902391; rs12490065; rs2846765; rs820496; rs9545502		0.970543049508918	NO
GCST90027451	ASPASN.PWY..superpathway.of.L.aspartate.and.L.asparagine.biosynthesis	OID20069	Protein canopy homolog 2	Q9Y2B0	CNPY2	Cardiometabolic	MR Egger	5	-0.239922	0.522023	0.677063	0.0199413	0.048268	0.707261	1.64916	3	0.648294	rs113902391; rs12490065; rs2846765; rs820496; rs9545502		NA	NO
GCST90027451	ASPASN.PWY..superpathway.of.L.aspartate.and.L.asparagine.biosynthesis	OID20605	Interleukin-32	P24001	IL32	Inflammation	Weighted median	5	-0.0792401	0.0503491	0.115531							rs113902391; rs12490065; rs2846765; rs820496; rs9545502		NA	NO
GCST90027451	ASPASN.PWY..superpathway.of.L.aspartate.and.L.asparagine.biosynthesis	OID20605	Interleukin-32	P24001	IL32	Inflammation	MR-PRESSO	5	-0.0745129	0.027611	0.054169							rs113902391; rs12490065; rs2846765; rs820496; rs9545502		NA	NO
GCST90027451	ASPASN.PWY..superpathway.of.L.aspartate.and.L.asparagine.biosynthesis	OID20606	Leukemia inhibitory factor receptor	P42702	LIFR	Inflammation	Inverse variance weighted	5	-0.0392038	0.0418095	0.34841				4.28851	4	0.368366	rs113902391; rs12490065; rs2846765; rs820496; rs9545502		0.758305006251138	NO
GCST90027451	ASPASN.PWY..superpathway.of.L.aspartate.and.L.asparagine.biosynthesis	OID20606	Leukemia inhibitory factor receptor	P42702	LIFR	Inflammation	MR Egger	5	0.0746671	0.588087	0.906999	-0.0105608	0.0543594	0.85837	4.23523	3	0.237158	rs113902391; rs12490065; rs2846765; rs820496; rs9545502		NA	NO
GCST90027451	ASPASN.PWY..superpathway.of.L.aspartate.and.L.asparagine.biosynthesis	OID20606	Leukemia inhibitory factor receptor	P42702	LIFR	Inflammation	Weighted median	5	-0.0226326	0.0534504	0.671981							rs113902391; rs12490065; rs2846765; rs820496; rs9545502		NA	NO
GCST90027451	ASPASN.PWY..superpathway.of.L.aspartate.and.L.asparagine.biosynthesis	OID20059	Dual oxidase 2	Q9NRD8	DUOX2	Cardiometabolic	MR-PRESSO	5	0.0321566	0.0248995	0.26612							rs113902391; rs12490065; rs2846765; rs820496; rs9545502		NA	NO
GCST90027451	ASPASN.PWY..superpathway.of.L.aspartate.and.L.asparagine.biosynthesis	OID20071	Vesicle-associated membrane protein 5	O95183	VAMP5	Cardiometabolic	Inverse variance weighted	5	-0.0223258	0.0420008	0.595033				2.10761	4	0.715974	rs113902391; rs12490065; rs2846765; rs820496; rs9545502		0.846777889346236	NO
GCST90027451	ASPASN.PWY..superpathway.of.L.aspartate.and.L.asparagine.biosynthesis	OID20071	Vesicle-associated membrane protein 5	O95183	VAMP5	Cardiometabolic	MR Egger	5	-0.336237	0.518348	0.56278	0.0291209	0.047928	0.586361	1.73844	3	0.628422	rs113902391; rs12490065; rs2846765; rs820496; rs9545502		NA	NO
GCST90027451	ASPASN.PWY..superpathway.of.L.aspartate.and.L.asparagine.biosynthesis	OID20071	Vesicle-associated membrane protein 5	O95183	VAMP5	Cardiometabolic	Weighted median	5	-0.028854	0.0538685	0.592209							rs113902391; rs12490065; rs2846765; rs820496; rs9545502		NA	NO
GCST90027451	ASPASN.PWY..superpathway.of.L.aspartate.and.L.asparagine.biosynthesis	OID20071	Vesicle-associated membrane protein 5	O95183	VAMP5	Cardiometabolic	MR-PRESSO	5	-0.0223258	0.0304876	0.504587							rs113902391; rs12490065; rs2846765; rs820496; rs9545502		NA	NO
GCST90027451	ASPASN.PWY..superpathway.of.L.aspartate.and.L.asparagine.biosynthesis	OID20062	Aldo-keto reductase family 1 member C4	P17516	AKR1C4	Cardiometabolic	Inverse variance weighted	5	0.037118	0.0423619	0.380915				1.35992	4	0.85113	rs113902391; rs12490065; rs2846765; rs820496; rs9545502		0.981370496177096	NO
GCST90027451	ASPASN.PWY..superpathway.of.L.aspartate.and.L.asparagine.biosynthesis	OID20062	Aldo-keto reductase family 1 member C4	P17516	AKR1C4	Cardiometabolic	MR Egger	5	0.507147	0.522643	0.403445	-0.0436016	0.0483228	0.433404	0.545777	3	0.908725	rs113902391; rs12490065; rs2846765; rs820496; rs9545502		NA	NO
GCST90027451	ASPASN.PWY..superpathway.of.L.aspartate.and.L.asparagine.biosynthesis	OID20062	Aldo-keto reductase family 1 member C4	P17516	AKR1C4	Cardiometabolic	Weighted median	5	0.044377	0.0527117	0.399855							rs113902391; rs12490065; rs2846765; rs820496; rs9545502		NA	NO
GCST90027451	ASPASN.PWY..superpathway.of.L.aspartate.and.L.asparagine.biosynthesis	OID20062	Aldo-keto reductase family 1 member C4	P17516	AKR1C4	Cardiometabolic	MR-PRESSO	5	0.037118	0.0247003	0.207329							rs113902391; rs12490065; rs2846765; rs820496; rs9545502		NA	NO
GCST90027451	ASPASN.PWY..superpathway.of.L.aspartate.and.L.asparagine.biosynthesis	OID20063	Heme-binding protein 1	Q9NRV9	HEBP1	Cardiometabolic	Inverse variance weighted	5	-0.0388734	0.0423196	0.358322				3.2994	4	0.509027	rs113902391; rs12490065; rs2846765; rs820496; rs9545502		0.830467369363134	NO
GCST90027451	ASPASN.PWY..superpathway.of.L.aspartate.and.L.asparagine.biosynthesis	OID20073	REST corepressor 1	Q9UKL0	RCOR1	Cardiometabolic	MR Egger	5	-0.599495	0.521761	0.333862	0.0613486	0.0482421	0.293119	2.80835	3	0.422126	rs113902391; rs12490065; rs2846765; rs820496; rs9545502		NA	NO
GCST90027451	ASPASN.PWY..superpathway.of.L.aspartate.and.L.asparagine.biosynthesis	OID20073	REST corepressor 1	Q9UKL0	RCOR1	Cardiometabolic	Weighted median	5	0.0533765	0.0593287	0.368293							rs113902391; rs12490065; rs2846765; rs820496; rs9545502		NA	NO
GCST90027451	ASPASN.PWY..superpathway.of.L.aspartate.and.L.asparagine.biosynthesis	OID20073	REST corepressor 1	Q9UKL0	RCOR1	Cardiometabolic	MR-PRESSO	5	0.0618368	0.044484	0.23686							rs113902391; rs12490065; rs2846765; rs820496; rs9545502		NA	NO
GCST90027451	ASPASN.PWY..superpathway.of.L.aspartate.and.L.asparagine.biosynthesis	OID20074	Tumor necrosis factor	P01375	TNF	Cardiometabolic	Inverse variance weighted	5	0.0203192	0.0410621	0.620713				0.879561	4	0.927475	rs113902391; rs12490065; rs2846765; rs820496; rs9545502		0.930746220010284	NO
GCST90027451	ASPASN.PWY..superpathway.of.L.aspartate.and.L.asparagine.biosynthesis	OID20074	Tumor necrosis factor	P01375	TNF	Cardiometabolic	MR Egger	5	0.170495	0.506665	0.758654	-0.0139307	0.046845	0.78558	0.791127	3	0.851588	rs113902391; rs12490065; rs2846765; rs820496; rs9545502		NA	NO
GCST90027451	ASPASN.PWY..superpathway.of.L.aspartate.and.L.asparagine.biosynthesis	OID20084	FGFR1 oncogene partner	O95684	CEP43	Cardiometabolic	Weighted median	5	-0.029432	0.0654494	0.652933							rs113902391; rs12490065; rs2846765; rs820496; rs9545502		NA	NO
GCST90027451	ASPASN.PWY..superpathway.of.L.aspartate.and.L.asparagine.biosynthesis	OID20084	FGFR1 oncogene partner	O95684	CEP43	Cardiometabolic	MR-PRESSO	5	0.0594434	0.0695977	0.441183							rs113902391; rs12490065; rs2846765; rs820496; rs9545502		NA	NO
GCST90027451	ASPASN.PWY..superpathway.of.L.aspartate.and.L.asparagine.biosynthesis	OID20085	Lymphoid-restricted membrane protein	Q12912	IRAG2	Cardiometabolic	Inverse variance weighted	5	0.0378301	0.05481	0.490065				7.05607	4	0.132955	rs113902391; rs12490065; rs2846765; rs820496; rs9545502		0.941991612093432	NO
GCST90027451	ASPASN.PWY..superpathway.of.L.aspartate.and.L.asparagine.biosynthesis	OID20085	Lymphoid-restricted membrane protein	Q12912	IRAG2	Cardiometabolic	MR Egger	5	-0.527675	0.70887	0.510647	0.052459	0.0655419	0.482005	5.81445	3	0.120995	rs113902391; rs12490065; rs2846765; rs820496; rs9545502		NA	NO
GCST90027451	ASPASN.PWY..superpathway.of.L.aspartate.and.L.asparagine.biosynthesis	OID20085	Lymphoid-restricted membrane protein	Q12912	IRAG2	Cardiometabolic	Weighted median	5	0.0835578	0.0595595	0.160638							rs113902391; rs12490065; rs2846765; rs820496; rs9545502		NA	NO
GCST90027451	ASPASN.PWY..superpathway.of.L.aspartate.and.L.asparagine.biosynthesis	OID20085	Lymphoid-restricted membrane protein	Q12912	IRAG2	Cardiometabolic	MR-PRESSO	5	0.0378301	0.05481	0.528024							rs113902391; rs12490065; rs2846765; rs820496; rs9545502		NA	NO
GCST90027451	ASPASN.PWY..superpathway.of.L.aspartate.and.L.asparagine.biosynthesis	OID20086	Catechol O-methyltransferase	P21964	COMT	Cardiometabolic	Inverse variance weighted	5	0.0235458	0.0605349	0.697304				9.22187	4	0.0557868	rs113902391; rs12490065; rs2846765; rs820496; rs9545502		0.992062999914733	NO
GCST90027451	ASPASN.PWY..superpathway.of.L.aspartate.and.L.asparagine.biosynthesis	OID20086	Catechol O-methyltransferase	P21964	COMT	Cardiometabolic	MR Egger	5	-0.252595	0.847631	0.785149	0.0256167	0.0783736	0.765255	8.90476	3	0.0305843	rs113902391; rs12490065; rs2846765; rs820496; rs9545502		NA	NO
GCST90027451	ASPASN.PWY..superpathway.of.L.aspartate.and.L.asparagine.biosynthesis	OID20086	Catechol O-methyltransferase	P21964	COMT	Cardiometabolic	Weighted median	5	1.351e-05	0.0581206	0.999815							rs113902391; rs12490065; rs2846765; rs820496; rs9545502		NA	NO
GCST90027451	ASPASN.PWY..superpathway.of.L.aspartate.and.L.asparagine.biosynthesis	OID20086	Catechol O-methyltransferase	P21964	COMT	Cardiometabolic	MR-PRESSO	5	0.0235458	0.0605349	0.717122							rs113902391; rs12490065; rs2846765; rs820496; rs9545502		NA	NO
GCST90027451	ASPASN.PWY..superpathway.of.L.aspartate.and.L.asparagine.biosynthesis	OID20087	Matrilysin	P09237	MMP7	Cardiometabolic	Inverse variance weighted	5	-0.0136582	0.0494035	0.782193				6.392	4	0.171724	rs113902391; rs12490065; rs2846765; rs820496; rs9545502		0.925455495822824	NO
GCST90027451	ASPASN.PWY..superpathway.of.L.aspartate.and.L.asparagine.biosynthesis	OID20633	Pro-interleukin-16 [Cleaved into: Interleukin-16	Q14005	IL16	Inflammation	MR Egger	5	-0.816213	0.463812	0.176673	0.0835406	0.0428828	0.146544	0.891873	3	0.827389	rs113902391; rs12490065; rs2846765; rs820496; rs9545502		NA	NO
GCST90027451	ASPASN.PWY..superpathway.of.L.aspartate.and.L.asparagine.biosynthesis	OID20633	Pro-interleukin-16 [Cleaved into: Interleukin-16	Q14005	IL16	Inflammation	Weighted median	5	0.0808387	0.050401	0.108734							rs113902391; rs12490065; rs2846765; rs820496; rs9545502		NA	NO
GCST90027451	ASPASN.PWY..superpathway.of.L.aspartate.and.L.asparagine.biosynthesis	OID20633	Pro-interleukin-16 [Cleaved into: Interleukin-16	Q14005	IL16	Inflammation	MR-PRESSO	5	0.0843748	0.0406774	0.106716							rs113902391; rs12490065; rs2846765; rs820496; rs9545502		NA	NO
GCST90027451	ASPASN.PWY..superpathway.of.L.aspartate.and.L.asparagine.biosynthesis	OID20634	Neurofascin	O94856	NFASC	Inflammation	Inverse variance weighted	5	-0.0156704	0.0369927	0.671851				0.836637	4	0.93347	rs113902391; rs12490065; rs2846765; rs820496; rs9545502		0.888006053083191	NO
GCST90027451	ASPASN.PWY..superpathway.of.L.aspartate.and.L.asparagine.biosynthesis	OID20634	Neurofascin	O94856	NFASC	Inflammation	MR Egger	5	0.0986074	0.456394	0.8428	-0.0106008	0.0421972	0.817869	0.773526	3	0.855788	rs113902391; rs12490065; rs2846765; rs820496; rs9545502		NA	NO
GCST90027451	ASPASN.PWY..superpathway.of.L.aspartate.and.L.asparagine.biosynthesis	OID20634	Neurofascin	O94856	NFASC	Inflammation	Weighted median	5	-0.0226962	0.0446135	0.610943							rs113902391; rs12490065; rs2846765; rs820496; rs9545502		NA	NO
GCST90027451	ASPASN.PWY..superpathway.of.L.aspartate.and.L.asparagine.biosynthesis	OID20634	Neurofascin	O94856	NFASC	Inflammation	MR-PRESSO	5	-0.0156704	0.0169182	0.406743							rs113902391; rs12490065; rs2846765; rs820496; rs9545502		NA	NO
GCST90027451	ASPASN.PWY..superpathway.of.L.aspartate.and.L.asparagine.biosynthesis	OID20635	B-cell antigen receptor complex-associated protein beta chain	P40259	CD79B	Inflammation	Inverse variance weighted	5	-0.0178578	0.0399884	0.655183				0.460426	4	0.977237	rs113902391; rs12490065; rs2846765; rs820496; rs9545502		0.878878490147994	NO
GCST90027451	ASPASN.PWY..superpathway.of.L.aspartate.and.L.asparagine.biosynthesis	OID20635	B-cell antigen receptor complex-associated protein beta chain	P40259	CD79B	Inflammation	MR Egger	5	-0.00911139	0.492271	0.986395	-0.000811261	0.0455091	0.986897	0.460108	3	0.927564	rs113902391; rs12490065; rs2846765; rs820496; rs9545502		NA	NO
GCST90027451	ASPASN.PWY..superpathway.of.L.aspartate.and.L.asparagine.biosynthesis	OID20069	Protein canopy homolog 2	Q9Y2B0	CNPY2	Cardiometabolic	Weighted median	5	-0.0280127	0.0514815	0.586352							rs113902391; rs12490065; rs2846765; rs820496; rs9545502		NA	NO
GCST90027451	ASPASN.PWY..superpathway.of.L.aspartate.and.L.asparagine.biosynthesis	OID20069	Protein canopy homolog 2	Q9Y2B0	CNPY2	Cardiometabolic	MR-PRESSO	5	-0.0249643	0.0285337	0.431014							rs113902391; rs12490065; rs2846765; rs820496; rs9545502		NA	NO
GCST90027451	ASPASN.PWY..superpathway.of.L.aspartate.and.L.asparagine.biosynthesis	OID20070	Cone-rod homeobox protein	O43186	CRX	Cardiometabolic	Inverse variance weighted	5	-0.0261308	0.0424259	0.537949				0.716418	4	0.949289	rs113902391; rs12490065; rs2846765; rs820496; rs9545502		0.880405242457537	NO
GCST90027451	ASPASN.PWY..superpathway.of.L.aspartate.and.L.asparagine.biosynthesis	OID20070	Cone-rod homeobox protein	O43186	CRX	Cardiometabolic	MR Egger	5	0.147577	0.523559	0.796367	-0.0161143	0.0484092	0.761132	0.60561	3	0.895147	rs113902391; rs12490065; rs2846765; rs820496; rs9545502		NA	NO
GCST90027451	ASPASN.PWY..superpathway.of.L.aspartate.and.L.asparagine.biosynthesis	OID20070	Cone-rod homeobox protein	O43186	CRX	Cardiometabolic	Weighted median	5	-0.0164828	0.0515522	0.749172							rs113902391; rs12490065; rs2846765; rs820496; rs9545502		NA	NO
GCST90027451	ASPASN.PWY..superpathway.of.L.aspartate.and.L.asparagine.biosynthesis	OID20070	Cone-rod homeobox protein	O43186	CRX	Cardiometabolic	MR-PRESSO	5	-0.0261308	0.0179549	0.21927							rs113902391; rs12490065; rs2846765; rs820496; rs9545502		NA	NO
GCST90027451	ASPASN.PWY..superpathway.of.L.aspartate.and.L.asparagine.biosynthesis	OID20637	B-cell receptor CD22	P20273	CD22	Inflammation	Inverse variance weighted	5	0.0426243	0.0385889	0.269344				3.01953	4	0.554563	rs113902391; rs12490065; rs2846765; rs820496; rs9545502		0.553652062879571	NO
GCST90027451	ASPASN.PWY..superpathway.of.L.aspartate.and.L.asparagine.biosynthesis	OID20637	B-cell receptor CD22	P20273	CD22	Inflammation	MR Egger	5	-0.331167	0.476094	0.536726	0.0346728	0.0440172	0.488368	2.39904	3	0.493814	rs113902391; rs12490065; rs2846765; rs820496; rs9545502		NA	NO
GCST90027451	ASPASN.PWY..superpathway.of.L.aspartate.and.L.asparagine.biosynthesis	OID20637	B-cell receptor CD22	P20273	CD22	Inflammation	Weighted median	5	0.0192511	0.0520836	0.711666							rs113902391; rs12490065; rs2846765; rs820496; rs9545502		NA	NO
GCST90027451	ASPASN.PWY..superpathway.of.L.aspartate.and.L.asparagine.biosynthesis	OID20637	B-cell receptor CD22	P20273	CD22	Inflammation	MR-PRESSO	5	0.0426243	0.0335276	0.272511							rs113902391; rs12490065; rs2846765; rs820496; rs9545502		NA	NO
GCST90027451	ASPASN.PWY..superpathway.of.L.aspartate.and.L.asparagine.biosynthesis	OID20072	Sushi domain-containing protein 1	Q6UWL2	SUSD1	Cardiometabolic	Inverse variance weighted	5	-0.0163855	0.0464687	0.724378				4.90049	4	0.297661	rs113902391; rs12490065; rs2846765; rs820496; rs9545502		0.985993681772161	NO
GCST90027451	ASPASN.PWY..superpathway.of.L.aspartate.and.L.asparagine.biosynthesis	OID20072	Sushi domain-containing protein 1	Q6UWL2	SUSD1	Cardiometabolic	MR Egger	5	-0.822657	0.51751	0.210134	0.0747914	0.047847	0.215964	2.45709	3	0.483095	rs113902391; rs12490065; rs2846765; rs820496; rs9545502		NA	NO
GCST90027451	ASPASN.PWY..superpathway.of.L.aspartate.and.L.asparagine.biosynthesis	OID20072	Sushi domain-containing protein 1	Q6UWL2	SUSD1	Cardiometabolic	Weighted median	5	-0.0508762	0.0576462	0.377475							rs113902391; rs12490065; rs2846765; rs820496; rs9545502		NA	NO
GCST90027451	ASPASN.PWY..superpathway.of.L.aspartate.and.L.asparagine.biosynthesis	OID20072	Sushi domain-containing protein 1	Q6UWL2	SUSD1	Cardiometabolic	MR-PRESSO	5	-0.0163855	0.0464687	0.742174							rs113902391; rs12490065; rs2846765; rs820496; rs9545502		NA	NO
GCST90027451	ASPASN.PWY..superpathway.of.L.aspartate.and.L.asparagine.biosynthesis	OID20073	REST corepressor 1	Q9UKL0	RCOR1	Cardiometabolic	Inverse variance weighted	5	0.0618368	0.044484	0.164502				4.42553	4	0.351469	rs113902391; rs12490065; rs2846765; rs820496; rs9545502		0.718027074568651	NO
GCST90027451	ASPASN.PWY..superpathway.of.L.aspartate.and.L.asparagine.biosynthesis	OID20639	Fc receptor-like protein 2	Q96LA5	FCRL2	Inflammation	MR Egger	5	0.532219	0.522215	0.383156	-0.0452753	0.0482785	0.417532	4.23671	3	0.237012	rs113902391; rs12490065; rs2846765; rs820496; rs9545502		NA	NO
GCST90027451	ASPASN.PWY..superpathway.of.L.aspartate.and.L.asparagine.biosynthesis	OID20639	Fc receptor-like protein 2	Q96LA5	FCRL2	Inflammation	Weighted median	5	-0.00125256	0.0487675	0.979509							rs113902391; rs12490065; rs2846765; rs820496; rs9545502		NA	NO
GCST90027451	ASPASN.PWY..superpathway.of.L.aspartate.and.L.asparagine.biosynthesis	OID20639	Fc receptor-like protein 2	Q96LA5	FCRL2	Inflammation	MR-PRESSO	5	0.0440988	0.0416591	0.349488							rs113902391; rs12490065; rs2846765; rs820496; rs9545502		NA	NO
GCST90027451	ASPASN.PWY..superpathway.of.L.aspartate.and.L.asparagine.biosynthesis	OID20640	Linker for activation of T-cells family member 1	O43561	LAT	Inflammation	Inverse variance weighted	5	0.00986281	0.0411519	0.810587				3.50763	4	0.47672	rs113902391; rs12490065; rs2846765; rs820496; rs9545502		0.994125587450582	NO
GCST90027451	ASPASN.PWY..superpathway.of.L.aspartate.and.L.asparagine.biosynthesis	OID20640	Linker for activation of T-cells family member 1	O43561	LAT	Inflammation	MR Egger	5	-0.442367	0.507911	0.447871	0.0419519	0.0469623	0.43751	2.70963	3	0.438594	rs113902391; rs12490065; rs2846765; rs820496; rs9545502		NA	NO
GCST90027451	ASPASN.PWY..superpathway.of.L.aspartate.and.L.asparagine.biosynthesis	OID20640	Linker for activation of T-cells family member 1	O43561	LAT	Inflammation	Weighted median	5	-0.00869087	0.0523348	0.868107							rs113902391; rs12490065; rs2846765; rs820496; rs9545502		NA	NO
GCST90027451	ASPASN.PWY..superpathway.of.L.aspartate.and.L.asparagine.biosynthesis	OID20640	Linker for activation of T-cells family member 1	O43561	LAT	Inflammation	MR-PRESSO	5	0.00986281	0.038536	0.810622							rs113902391; rs12490065; rs2846765; rs820496; rs9545502		NA	NO
GCST90027451	ASPASN.PWY..superpathway.of.L.aspartate.and.L.asparagine.biosynthesis	OID20641	GMP reductase 1	P36959	GMPR	Inflammation	Inverse variance weighted	5	-0.0115059	0.0649586	0.859409				10.7288	4	0.0297876	rs113902391; rs12490065; rs2846765; rs820496; rs9545502		0.96300744108041	NO
GCST90027451	ASPASN.PWY..superpathway.of.L.aspartate.and.L.asparagine.biosynthesis	OID20641	GMP reductase 1	P36959	GMPR	Inflammation	MR Egger	5	-0.550628	0.871654	0.572433	0.0500129	0.0805952	0.57885	9.50829	3	0.0232433	rs113902391; rs12490065; rs2846765; rs820496; rs9545502		NA	NO
GCST90027451	ASPASN.PWY..superpathway.of.L.aspartate.and.L.asparagine.biosynthesis	OID20641	GMP reductase 1	P36959	GMPR	Inflammation	Weighted median	5	-0.0646861	0.0589224	0.272284							rs113902391; rs12490065; rs2846765; rs820496; rs9545502		NA	NO
GCST90027451	ASPASN.PWY..superpathway.of.L.aspartate.and.L.asparagine.biosynthesis	OID20641	GMP reductase 1	P36959	GMPR	Inflammation	MR-PRESSO	5	-0.0115059	0.0649586	0.868016							rs113902391; rs12490065; rs2846765; rs820496; rs9545502		NA	NO
GCST90027451	ASPASN.PWY..superpathway.of.L.aspartate.and.L.asparagine.biosynthesis	OID20642	Tryptase alpha/beta-1	Q15661	TPSAB1	Inflammation	Inverse variance weighted	5	-0.0355435	0.0277332	0.199974				2.54677	4	0.636281	rs113902391; rs12490065; rs2846765; rs820496; rs9545502		0.780742988220445	NO
GCST90027451	ASPASN.PWY..superpathway.of.L.aspartate.and.L.asparagine.biosynthesis	OID20642	Tryptase alpha/beta-1	Q15661	TPSAB1	Inflammation	MR Egger	5	-0.297028	0.342386	0.449481	0.024257	0.0316576	0.499313	1.95966	3	0.580821	rs113902391; rs12490065; rs2846765; rs820496; rs9545502		NA	NO
GCST90027451	ASPASN.PWY..superpathway.of.L.aspartate.and.L.asparagine.biosynthesis	OID20642	Tryptase alpha/beta-1	Q15661	TPSAB1	Inflammation	Weighted median	5	-0.03478	0.0337361	0.302569							rs113902391; rs12490065; rs2846765; rs820496; rs9545502		NA	NO
GCST90027451	ASPASN.PWY..superpathway.of.L.aspartate.and.L.asparagine.biosynthesis	OID20642	Tryptase alpha/beta-1	Q15661	TPSAB1	Inflammation	MR-PRESSO	5	-0.0355435	0.0221291	0.183507							rs113902391; rs12490065; rs2846765; rs820496; rs9545502		NA	NO
GCST90027451	ASPASN.PWY..superpathway.of.L.aspartate.and.L.asparagine.biosynthesis	OID20643	Neurabin-2	Q96SB3	PPP1R9B	Inflammation	Inverse variance weighted	5	0.056023	0.0576722	0.331347				8.1234	4	0.0871612	rs113902391; rs12490065; rs2846765; rs820496; rs9545502		0.974572542257233	NO
GCST90027451	ASPASN.PWY..superpathway.of.L.aspartate.and.L.asparagine.biosynthesis	OID20643	Neurabin-2	Q96SB3	PPP1R9B	Inflammation	MR Egger	5	-0.389069	0.780301	0.652316	0.041289	0.0721466	0.607198	7.32383	3	0.062262	rs113902391; rs12490065; rs2846765; rs820496; rs9545502		NA	NO
GCST90027451	ASPASN.PWY..superpathway.of.L.aspartate.and.L.asparagine.biosynthesis	OID20643	Neurabin-2	Q96SB3	PPP1R9B	Inflammation	Weighted median	5	0.0441669	0.0606498	0.466473							rs113902391; rs12490065; rs2846765; rs820496; rs9545502		NA	NO
GCST90027451	ASPASN.PWY..superpathway.of.L.aspartate.and.L.asparagine.biosynthesis	OID20643	Neurabin-2	Q96SB3	PPP1R9B	Inflammation	MR-PRESSO	5	0.056023	0.0576722	0.386354							rs113902391; rs12490065; rs2846765; rs820496; rs9545502		NA	NO
GCST90027451	ASPASN.PWY..superpathway.of.L.aspartate.and.L.asparagine.biosynthesis	OID20644	Peroxiredoxin-5, mitochondrial	P30044	PRDX5	Inflammation	Inverse variance weighted	5	0.0163219	0.0588581	0.781542				8.2475	4	0.0829213	rs113902391; rs12490065; rs2846765; rs820496; rs9545502		0.938246955239728	NO
GCST90027451	ASPASN.PWY..superpathway.of.L.aspartate.and.L.asparagine.biosynthesis	OID20644	Peroxiredoxin-5, mitochondrial	P30044	PRDX5	Inflammation	MR Egger	5	-0.412458	0.80137	0.642288	0.0397768	0.0740967	0.628648	7.52468	3	0.0569277	rs113902391; rs12490065; rs2846765; rs820496; rs9545502		NA	NO
GCST90027451	ASPASN.PWY..superpathway.of.L.aspartate.and.L.asparagine.biosynthesis	OID20644	Peroxiredoxin-5, mitochondrial	P30044	PRDX5	Inflammation	Weighted median	5	-0.044307	0.0592288	0.454421							rs113902391; rs12490065; rs2846765; rs820496; rs9545502		NA	NO
GCST90027451	ASPASN.PWY..superpathway.of.L.aspartate.and.L.asparagine.biosynthesis	OID20644	Peroxiredoxin-5, mitochondrial	P30044	PRDX5	Inflammation	MR-PRESSO	5	0.0163219	0.0588581	0.795284							rs113902391; rs12490065; rs2846765; rs820496; rs9545502		NA	NO
GCST90027451	ASPASN.PWY..superpathway.of.L.aspartate.and.L.asparagine.biosynthesis	OID20645	Adenosine deaminase	P00813	ADA	Inflammation	Inverse variance weighted	5	-0.0171579	0.0359698	0.633355				1.06333	4	0.900045	rs113902391; rs12490065; rs2846765; rs820496; rs9545502		0.825333279796992	NO
GCST90027451	ASPASN.PWY..superpathway.of.L.aspartate.and.L.asparagine.biosynthesis	OID20645	Adenosine deaminase	P00813	ADA	Inflammation	MR Egger	5	-0.259948	0.444123	0.599457	0.0225238	0.0410661	0.621545	0.762508	3	0.858412	rs113902391; rs12490065; rs2846765; rs820496; rs9545502		NA	NO
GCST90027451	ASPASN.PWY..superpathway.of.L.aspartate.and.L.asparagine.biosynthesis	OID20635	B-cell antigen receptor complex-associated protein beta chain	P40259	CD79B	Inflammation	Weighted median	5	-0.0306701	0.0466733	0.511102							rs113902391; rs12490065; rs2846765; rs820496; rs9545502		NA	NO
GCST90027451	ASPASN.PWY..superpathway.of.L.aspartate.and.L.asparagine.biosynthesis	OID20635	B-cell antigen receptor complex-associated protein beta chain	P40259	CD79B	Inflammation	MR-PRESSO	5	-0.0178578	0.013567	0.258444							rs113902391; rs12490065; rs2846765; rs820496; rs9545502		NA	NO
GCST90027451	ASPASN.PWY..superpathway.of.L.aspartate.and.L.asparagine.biosynthesis	OID20636	C-type lectin domain family 7 member A	Q9BXN2	CLEC7A	Inflammation	Inverse variance weighted	5	-0.0140303	0.032343	0.664435				4.2078	4	0.378613	rs113902391; rs12490065; rs2846765; rs820496; rs9545502		0.840397275371864	NO
GCST90027451	ASPASN.PWY..superpathway.of.L.aspartate.and.L.asparagine.biosynthesis	OID20636	C-type lectin domain family 7 member A	Q9BXN2	CLEC7A	Inflammation	MR Egger	5	0.11025	0.455474	0.824341	-0.0115293	0.0421148	0.802037	4.10525	3	0.250321	rs113902391; rs12490065; rs2846765; rs820496; rs9545502		NA	NO
GCST90027451	ASPASN.PWY..superpathway.of.L.aspartate.and.L.asparagine.biosynthesis	OID20636	C-type lectin domain family 7 member A	Q9BXN2	CLEC7A	Inflammation	Weighted median	5	0.00992035	0.0466458	0.831581							rs113902391; rs12490065; rs2846765; rs820496; rs9545502		NA	NO
GCST90027451	ASPASN.PWY..superpathway.of.L.aspartate.and.L.asparagine.biosynthesis	OID20636	C-type lectin domain family 7 member A	Q9BXN2	CLEC7A	Inflammation	MR-PRESSO	5	-0.0140303	0.032343	0.686807							rs113902391; rs12490065; rs2846765; rs820496; rs9545502		NA	NO
GCST90027451	ASPASN.PWY..superpathway.of.L.aspartate.and.L.asparagine.biosynthesis	OID20647	CD160 antigen	O95971	CD160	Inflammation	Inverse variance weighted	5	0.000503829	0.0711019	0.994346				13.0297	4	0.0111316	rs113902391; rs12490065; rs2846765; rs820496; rs9545502		0.994346230120409	NO
GCST90027451	ASPASN.PWY..superpathway.of.L.aspartate.and.L.asparagine.biosynthesis	OID20647	CD160 antigen	O95971	CD160	Inflammation	MR Egger	5	0.928917	0.859136	0.358762	-0.0861271	0.0794385	0.35763	9.36156	3	0.0248506	rs113902391; rs12490065; rs2846765; rs820496; rs9545502		NA	NO
GCST90027451	ASPASN.PWY..superpathway.of.L.aspartate.and.L.asparagine.biosynthesis	OID20647	CD160 antigen	O95971	CD160	Inflammation	Weighted median	5	-0.0213689	0.059357	0.718842							rs113902391; rs12490065; rs2846765; rs820496; rs9545502		NA	NO
GCST90027451	ASPASN.PWY..superpathway.of.L.aspartate.and.L.asparagine.biosynthesis	OID20647	CD160 antigen	O95971	CD160	Inflammation	MR-PRESSO	3	0.000503829	0.0711019	0.994686							rs113902391; rs12490065; rs9545502		NA	NO
GCST90027451	ASPASN.PWY..superpathway.of.L.aspartate.and.L.asparagine.biosynthesis	OID20638	Lysosome-associated membrane glycoprotein 3	Q9UQV4	LAMP3	Inflammation	Inverse variance weighted	5	-0.0713166	0.0388916	0.0666944				1.48023	4	0.830138	rs113902391; rs12490065; rs2846765; rs820496; rs9545502		0.552256169427448	NO
GCST90027451	ASPASN.PWY..superpathway.of.L.aspartate.and.L.asparagine.biosynthesis	OID20638	Lysosome-associated membrane glycoprotein 3	Q9UQV4	LAMP3	Inflammation	MR Egger	5	-0.112815	0.478914	0.828936	0.00384894	0.0442723	0.936199	1.47267	3	0.688592	rs113902391; rs12490065; rs2846765; rs820496; rs9545502		NA	NO
GCST90027451	ASPASN.PWY..superpathway.of.L.aspartate.and.L.asparagine.biosynthesis	OID20638	Lysosome-associated membrane glycoprotein 3	Q9UQV4	LAMP3	Inflammation	Weighted median	5	-0.064108	0.046568	0.168619							rs113902391; rs12490065; rs2846765; rs820496; rs9545502		NA	NO
GCST90027451	ASPASN.PWY..superpathway.of.L.aspartate.and.L.asparagine.biosynthesis	OID20638	Lysosome-associated membrane glycoprotein 3	Q9UQV4	LAMP3	Inflammation	MR-PRESSO	5	-0.0713166	0.0236587	0.0393796							rs113902391; rs12490065; rs2846765; rs820496; rs9545502		NA	NO
GCST90027451	ASPASN.PWY..superpathway.of.L.aspartate.and.L.asparagine.biosynthesis	OID20639	Fc receptor-like protein 2	Q96LA5	FCRL2	Inflammation	Inverse variance weighted	5	0.0440988	0.0416591	0.289798				5.47871	4	0.241607	rs113902391; rs12490065; rs2846765; rs820496; rs9545502		0.65031004092246	NO
GCST90027451	ASPASN.PWY..superpathway.of.L.aspartate.and.L.asparagine.biosynthesis	OID20649	T-cell differentiation antigen CD6	P30203	CD6	Inflammation	MR Egger	5	-0.38301	0.411387	0.420519	0.0376216	0.0380378	0.395552	1.08706	3	0.780198	rs113902391; rs12490065; rs2846765; rs820496; rs9545502		NA	NO
GCST90027451	ASPASN.PWY..superpathway.of.L.aspartate.and.L.asparagine.biosynthesis	OID20649	T-cell differentiation antigen CD6	P30203	CD6	Inflammation	Weighted median	5	0.0233946	0.0432626	0.588675							rs113902391; rs12490065; rs2846765; rs820496; rs9545502		NA	NO
GCST90027451	ASPASN.PWY..superpathway.of.L.aspartate.and.L.asparagine.biosynthesis	OID20649	T-cell differentiation antigen CD6	P30203	CD6	Inflammation	MR-PRESSO	5	0.0225379	0.0239491	0.39995							rs113902391; rs12490065; rs2846765; rs820496; rs9545502		NA	NO
GCST90027451	ASPASN.PWY..superpathway.of.L.aspartate.and.L.asparagine.biosynthesis	OID20650	Vascular endothelial growth factor A	P15692	VEGFA	Inflammation	Inverse variance weighted	5	-0.00393166	0.0352059	0.91108				3.14046	4	0.534601	rs113902391; rs12490065; rs2846765; rs820496; rs9545502		0.980297925088668	NO
GCST90027451	ASPASN.PWY..superpathway.of.L.aspartate.and.L.asparagine.biosynthesis	OID20650	Vascular endothelial growth factor A	P15692	VEGFA	Inflammation	MR Egger	5	-0.0655348	0.441805	0.891489	0.00571408	0.0408447	0.897605	3.1201	3	0.373476	rs113902391; rs12490065; rs2846765; rs820496; rs9545502		NA	NO
GCST90027451	ASPASN.PWY..superpathway.of.L.aspartate.and.L.asparagine.biosynthesis	OID20650	Vascular endothelial growth factor A	P15692	VEGFA	Inflammation	Weighted median	5	0.0223021	0.0460353	0.628062							rs113902391; rs12490065; rs2846765; rs820496; rs9545502		NA	NO
GCST90027451	ASPASN.PWY..superpathway.of.L.aspartate.and.L.asparagine.biosynthesis	OID20650	Vascular endothelial growth factor A	P15692	VEGFA	Inflammation	MR-PRESSO	5	-0.00393166	0.0311948	0.905785							rs113902391; rs12490065; rs2846765; rs820496; rs9545502		NA	NO
GCST90027451	ASPASN.PWY..superpathway.of.L.aspartate.and.L.asparagine.biosynthesis	OID20651	Disintegrin and metalloproteinase domain-containing protein 23	O75077	ADAM23	Inflammation	Inverse variance weighted	5	0.0142635	0.0344646	0.678978				2.96414	4	0.563845	rs113902391; rs12490065; rs2846765; rs820496; rs9545502		0.997826962378196	NO
GCST90027451	ASPASN.PWY..superpathway.of.L.aspartate.and.L.asparagine.biosynthesis	OID20651	Disintegrin and metalloproteinase domain-containing protein 23	O75077	ADAM23	Inflammation	MR Egger	5	0.215306	0.425176	0.647452	-0.0186497	0.0393117	0.667604	2.73908	3	0.433628	rs113902391; rs12490065; rs2846765; rs820496; rs9545502		NA	NO
GCST90027451	ASPASN.PWY..superpathway.of.L.aspartate.and.L.asparagine.biosynthesis	OID20075	Carbonic anhydrase 5A, mitochondrial	P35218	CA5A	Cardiometabolic	MR Egger	5	-0.136882	0.664962	0.850086	0.0139682	0.0614822	0.834877	6.80782	3	0.0782821	rs113902391; rs12490065; rs2846765; rs820496; rs9545502		NA	NO
GCST90027451	ASPASN.PWY..superpathway.of.L.aspartate.and.L.asparagine.biosynthesis	OID20075	Carbonic anhydrase 5A, mitochondrial	P35218	CA5A	Cardiometabolic	Weighted median	5	0.0467613	0.0517672	0.366368							rs113902391; rs12490065; rs2846765; rs820496; rs9545502		NA	NO
GCST90027451	ASPASN.PWY..superpathway.of.L.aspartate.and.L.asparagine.biosynthesis	OID20075	Carbonic anhydrase 5A, mitochondrial	P35218	CA5A	Cardiometabolic	MR-PRESSO	5	0.0136942	0.047058	0.785512							rs113902391; rs12490065; rs2846765; rs820496; rs9545502		NA	NO
GCST90027451	ASPASN.PWY..superpathway.of.L.aspartate.and.L.asparagine.biosynthesis	OID20076	Gastrotropin	P51161	FABP6	Cardiometabolic	Inverse variance weighted	5	-0.028129	0.045001	0.531921				4.78332	4	0.310261	rs113902391; rs12490065; rs2846765; rs820496; rs9545502		0.964425649517493	NO
GCST90027451	ASPASN.PWY..superpathway.of.L.aspartate.and.L.asparagine.biosynthesis	OID20076	Gastrotropin	P51161	FABP6	Cardiometabolic	MR Egger	5	0.256828	0.619253	0.706207	-0.0264331	0.0572538	0.675728	4.46601	3	0.215342	rs113902391; rs12490065; rs2846765; rs820496; rs9545502		NA	NO
GCST90027451	ASPASN.PWY..superpathway.of.L.aspartate.and.L.asparagine.biosynthesis	OID20076	Gastrotropin	P51161	FABP6	Cardiometabolic	Weighted median	5	-0.0245536	0.054385	0.651646							rs113902391; rs12490065; rs2846765; rs820496; rs9545502		NA	NO
GCST90027451	ASPASN.PWY..superpathway.of.L.aspartate.and.L.asparagine.biosynthesis	OID20076	Gastrotropin	P51161	FABP6	Cardiometabolic	MR-PRESSO	5	-0.028129	0.045001	0.565811							rs113902391; rs12490065; rs2846765; rs820496; rs9545502		NA	NO
GCST90027451	ASPASN.PWY..superpathway.of.L.aspartate.and.L.asparagine.biosynthesis	OID20077	Serine/threonine-protein kinase STK11	Q15831	STK11	Cardiometabolic	Inverse variance weighted	5	0.0429732	0.0653614	0.510879				9.98239	4	0.0407254	rs113902391; rs12490065; rs2846765; rs820496; rs9545502		0.875756068089549	NO
GCST90027451	ASPASN.PWY..superpathway.of.L.aspartate.and.L.asparagine.biosynthesis	OID20077	Serine/threonine-protein kinase STK11	Q15831	STK11	Cardiometabolic	MR Egger	5	-0.562346	0.862494	0.5609	0.0561524	0.0797459	0.532081	8.56658	3	0.0356446	rs113902391; rs12490065; rs2846765; rs820496; rs9545502		NA	NO
GCST90027451	ASPASN.PWY..superpathway.of.L.aspartate.and.L.asparagine.biosynthesis	OID20077	Serine/threonine-protein kinase STK11	Q15831	STK11	Cardiometabolic	Weighted median	5	-0.0200577	0.0653378	0.758855							rs113902391; rs12490065; rs2846765; rs820496; rs9545502		NA	NO
GCST90027451	ASPASN.PWY..superpathway.of.L.aspartate.and.L.asparagine.biosynthesis	OID20077	Serine/threonine-protein kinase STK11	Q15831	STK11	Cardiometabolic	MR-PRESSO	5	0.0429732	0.0653614	0.546788							rs113902391; rs12490065; rs2846765; rs820496; rs9545502		NA	NO
GCST90027451	ASPASN.PWY..superpathway.of.L.aspartate.and.L.asparagine.biosynthesis	OID20078	Tetraspanin-1	O60635	TSPAN1	Cardiometabolic	Inverse variance weighted	5	0.0380255	0.0383724	0.321705				0.75065	4	0.944939	rs113902391; rs12490065; rs2846765; rs820496; rs9545502		0.919112749277132	NO
GCST90027451	ASPASN.PWY..superpathway.of.L.aspartate.and.L.asparagine.biosynthesis	OID20078	Tetraspanin-1	O60635	TSPAN1	Cardiometabolic	MR Egger	5	-0.156421	0.473476	0.762849	0.0180373	0.0437762	0.707986	0.580877	3	0.900796	rs113902391; rs12490065; rs2846765; rs820496; rs9545502		NA	NO
GCST90027451	ASPASN.PWY..superpathway.of.L.aspartate.and.L.asparagine.biosynthesis	OID20078	Tetraspanin-1	O60635	TSPAN1	Cardiometabolic	Weighted median	5	0.0327154	0.0460245	0.477193							rs113902391; rs12490065; rs2846765; rs820496; rs9545502		NA	NO
GCST90027451	ASPASN.PWY..superpathway.of.L.aspartate.and.L.asparagine.biosynthesis	OID20078	Tetraspanin-1	O60635	TSPAN1	Cardiometabolic	MR-PRESSO	5	0.0380255	0.0166229	0.0840853							rs113902391; rs12490065; rs2846765; rs820496; rs9545502		NA	NO
GCST90027451	ASPASN.PWY..superpathway.of.L.aspartate.and.L.asparagine.biosynthesis	OID20079	Actin, aortic smooth muscle	P62736	ACTA2	Cardiometabolic	Inverse variance weighted	5	-0.00576043	0.0375561	0.878097				3.97476	4	0.409433	rs113902391; rs12490065; rs2846765; rs820496; rs9545502		0.992831504682088	NO
GCST90027451	ASPASN.PWY..superpathway.of.L.aspartate.and.L.asparagine.biosynthesis	OID20645	Adenosine deaminase	P00813	ADA	Inflammation	Weighted median	5	0.00127453	0.0431826	0.976454							rs113902391; rs12490065; rs2846765; rs820496; rs9545502		NA	NO
GCST90027451	ASPASN.PWY..superpathway.of.L.aspartate.and.L.asparagine.biosynthesis	OID20645	Adenosine deaminase	P00813	ADA	Inflammation	MR-PRESSO	5	-0.0171579	0.0185457	0.407239							rs113902391; rs12490065; rs2846765; rs820496; rs9545502		NA	NO
GCST90027451	ASPASN.PWY..superpathway.of.L.aspartate.and.L.asparagine.biosynthesis	OID20646	Tumor necrosis factor receptor superfamily member 11A	Q9Y6Q6	TNFRSF11A	Inflammation	Inverse variance weighted	5	-0.0427469	0.037045	0.248534				2.05918	4	0.724875	rs113902391; rs12490065; rs2846765; rs820496; rs9545502		0.707366614860214	NO
GCST90027451	ASPASN.PWY..superpathway.of.L.aspartate.and.L.asparagine.biosynthesis	OID20646	Tumor necrosis factor receptor superfamily member 11A	Q9Y6Q6	TNFRSF11A	Inflammation	MR Egger	5	-0.134796	0.479612	0.796939	0.00858728	0.0446092	0.859645	2.02212	3	0.567828	rs113902391; rs12490065; rs2846765; rs820496; rs9545502		NA	NO
GCST90027451	ASPASN.PWY..superpathway.of.L.aspartate.and.L.asparagine.biosynthesis	OID20646	Tumor necrosis factor receptor superfamily member 11A	Q9Y6Q6	TNFRSF11A	Inflammation	Weighted median	5	-0.0275846	0.0455788	0.545042							rs113902391; rs12490065; rs2846765; rs820496; rs9545502		NA	NO
GCST90027451	ASPASN.PWY..superpathway.of.L.aspartate.and.L.asparagine.biosynthesis	OID20646	Tumor necrosis factor receptor superfamily member 11A	Q9Y6Q6	TNFRSF11A	Inflammation	MR-PRESSO	5	-0.0427469	0.0265795	0.183058							rs113902391; rs12490065; rs2846765; rs820496; rs9545502		NA	NO
GCST90027451	ASPASN.PWY..superpathway.of.L.aspartate.and.L.asparagine.biosynthesis	OID20596	Keratin, type I cytoskeletal 19	P08727	KRT19	Inflammation	Weighted median	5	-0.00883084	0.0567946	0.876437							rs113902391; rs12490065; rs2846765; rs820496; rs9545502		NA	NO
GCST90027451	ASPASN.PWY..superpathway.of.L.aspartate.and.L.asparagine.biosynthesis	OID20596	Keratin, type I cytoskeletal 19	P08727	KRT19	Inflammation	MR-PRESSO	5	-0.0230045	0.0514329	0.67783							rs113902391; rs12490065; rs2846765; rs820496; rs9545502		NA	NO
GCST90027451	ASPASN.PWY..superpathway.of.L.aspartate.and.L.asparagine.biosynthesis	OID20597	Plexin-A4	Q9HCM2	PLXNA4	Inflammation	Inverse variance weighted	5	0.00063055	0.0413803	0.987842				2.18252	4	0.702231	rs113902391; rs12490065; rs2846765; rs820496; rs9545502		0.996287662470011	NO
GCST90027451	ASPASN.PWY..superpathway.of.L.aspartate.and.L.asparagine.biosynthesis	OID20597	Plexin-A4	Q9HCM2	PLXNA4	Inflammation	MR Egger	5	-0.460703	0.510505	0.433337	0.0427953	0.0472008	0.431423	1.36048	3	0.714825	rs113902391; rs12490065; rs2846765; rs820496; rs9545502		NA	NO
GCST90027451	ASPASN.PWY..superpathway.of.L.aspartate.and.L.asparagine.biosynthesis	OID20648	Hematopoietic lineage cell-specific protein	P14317	HCLS1	Inflammation	Inverse variance weighted	5	0.03726	0.0743439	0.616241				13.3301	4	0.0097704	rs113902391; rs12490065; rs2846765; rs820496; rs9545502		0.945996379277603	NO
GCST90027451	ASPASN.PWY..superpathway.of.L.aspartate.and.L.asparagine.biosynthesis	OID20648	Hematopoietic lineage cell-specific protein	P14317	HCLS1	Inflammation	MR Egger	5	-0.470382	1.01761	0.675369	0.0470918	0.0940889	0.651133	12.3028	3	0.00641458	rs113902391; rs12490065; rs2846765; rs820496; rs9545502		NA	NO
GCST90027451	ASPASN.PWY..superpathway.of.L.aspartate.and.L.asparagine.biosynthesis	OID20648	Hematopoietic lineage cell-specific protein	P14317	HCLS1	Inflammation	Weighted median	5	-0.0327024	0.0645619	0.612487							rs113902391; rs12490065; rs2846765; rs820496; rs9545502		NA	NO
GCST90027451	ASPASN.PWY..superpathway.of.L.aspartate.and.L.asparagine.biosynthesis	OID20648	Hematopoietic lineage cell-specific protein	P14317	HCLS1	Inflammation	MR-PRESSO	4	0.03726	0.0743439	0.642567							rs113902391; rs12490065; rs2846765; rs9545502		NA	NO
GCST90027451	ASPASN.PWY..superpathway.of.L.aspartate.and.L.asparagine.biosynthesis	OID20649	T-cell differentiation antigen CD6	P30203	CD6	Inflammation	Inverse variance weighted	5	0.0225379	0.0333294	0.498903				2.0653	4	0.72375	rs113902391; rs12490065; rs2846765; rs820496; rs9545502		0.93854025442259	NO
GCST90027451	ASPASN.PWY..superpathway.of.L.aspartate.and.L.asparagine.biosynthesis	OID20598	Receptor-type tyrosine-protein phosphatase mu	P28827	PTPRM	Inflammation	MR-PRESSO	5	-0.0440518	0.0287171	0.199815							rs113902391; rs12490065; rs2846765; rs820496; rs9545502		NA	NO
GCST90027451	ASPASN.PWY..superpathway.of.L.aspartate.and.L.asparagine.biosynthesis	OID20599	CD70 antigen	P32970	CD70	Inflammation	Inverse variance weighted	5	0.0339111	0.0409958	0.408133				7.84423	4	0.0974537	rs113902391; rs12490065; rs2846765; rs820496; rs9545502		0.810574994523557	NO
GCST90027451	ASPASN.PWY..superpathway.of.L.aspartate.and.L.asparagine.biosynthesis	OID20599	CD70 antigen	P32970	CD70	Inflammation	MR Egger	5	-0.482855	0.501766	0.406882	0.0479383	0.0463938	0.377464	5.78527	3	0.122538	rs113902391; rs12490065; rs2846765; rs820496; rs9545502		NA	NO
GCST90027451	ASPASN.PWY..superpathway.of.L.aspartate.and.L.asparagine.biosynthesis	OID20599	CD70 antigen	P32970	CD70	Inflammation	Weighted median	5	0.0654969	0.0390225	0.0932611							rs113902391; rs12490065; rs2846765; rs820496; rs9545502		NA	NO
GCST90027451	ASPASN.PWY..superpathway.of.L.aspartate.and.L.asparagine.biosynthesis	OID20599	CD70 antigen	P32970	CD70	Inflammation	MR-PRESSO	5	0.0339111	0.0409958	0.454624							rs113902391; rs12490065; rs2846765; rs820496; rs9545502		NA	NO
GCST90027451	ASPASN.PWY..superpathway.of.L.aspartate.and.L.asparagine.biosynthesis	OID20600	Protransforming growth factor alpha [Cleaved into: Transforming growth factor alpha	P01135	TGFA	Inflammation	Inverse variance weighted	5	0.00256451	0.0495021	0.958683				5.81526	4	0.213376	rs113902391; rs12490065; rs2846765; rs820496; rs9545502		0.985313336707395	NO
GCST90027451	ASPASN.PWY..superpathway.of.L.aspartate.and.L.asparagine.biosynthesis	OID20570	Pentraxin-related protein PTX3	P26022	PTX3	Inflammation	Weighted median	5	-0.0386117	0.0517065	0.455216							rs113902391; rs12490065; rs2846765; rs820496; rs9545502		NA	NO
GCST90027451	ASPASN.PWY..superpathway.of.L.aspartate.and.L.asparagine.biosynthesis	OID20570	Pentraxin-related protein PTX3	P26022	PTX3	Inflammation	MR-PRESSO	5	-0.0349719	0.0220429	0.187805							rs113902391; rs12490065; rs2846765; rs820496; rs9545502		NA	NO
GCST90027451	ASPASN.PWY..superpathway.of.L.aspartate.and.L.asparagine.biosynthesis	OID20571	Parathyroid hormone/parathyroid hormone-related peptide receptor	Q03431	PTH1R	Inflammation	Inverse variance weighted	5	0.0372513	0.0539035	0.489519				6.7713	4	0.148479	rs113902391; rs12490065; rs2846765; rs820496; rs9545502		0.835099719345492	NO
GCST90027451	ASPASN.PWY..superpathway.of.L.aspartate.and.L.asparagine.biosynthesis	OID20571	Parathyroid hormone/parathyroid hormone-related peptide receptor	Q03431	PTH1R	Inflammation	MR Egger	5	-0.63824	0.66032	0.405061	0.062659	0.0610499	0.380247	5.01156	3	0.170953	rs113902391; rs12490065; rs2846765; rs820496; rs9545502		NA	NO
GCST90027451	ASPASN.PWY..superpathway.of.L.aspartate.and.L.asparagine.biosynthesis	OID20571	Parathyroid hormone/parathyroid hormone-related peptide receptor	Q03431	PTH1R	Inflammation	Weighted median	5	0.00282123	0.0601547	0.962593							rs113902391; rs12490065; rs2846765; rs820496; rs9545502		NA	NO
GCST90027451	ASPASN.PWY..superpathway.of.L.aspartate.and.L.asparagine.biosynthesis	OID20571	Parathyroid hormone/parathyroid hormone-related peptide receptor	Q03431	PTH1R	Inflammation	MR-PRESSO	5	0.0372513	0.0539035	0.527532							rs113902391; rs12490065; rs2846765; rs820496; rs9545502		NA	NO
GCST90027451	ASPASN.PWY..superpathway.of.L.aspartate.and.L.asparagine.biosynthesis	OID20572	Egl nine homolog 1	Q9GZT9	EGLN1	Inflammation	Inverse variance weighted	5	0.0566008	0.0505271	0.262626				6.34502	4	0.174821	rs113902391; rs12490065; rs2846765; rs820496; rs9545502		0.962410472700171	NO
GCST90027451	ASPASN.PWY..superpathway.of.L.aspartate.and.L.asparagine.biosynthesis	OID20572	Egl nine homolog 1	Q9GZT9	EGLN1	Inflammation	MR Egger	5	-0.253556	0.697381	0.740281	0.0287718	0.0644802	0.685685	5.95012	3	0.114062	rs113902391; rs12490065; rs2846765; rs820496; rs9545502		NA	NO
GCST90027451	ASPASN.PWY..superpathway.of.L.aspartate.and.L.asparagine.biosynthesis	OID20572	Egl nine homolog 1	Q9GZT9	EGLN1	Inflammation	Weighted median	5	0.0156559	0.0587399	0.789831							rs113902391; rs12490065; rs2846765; rs820496; rs9545502		NA	NO
GCST90027451	ASPASN.PWY..superpathway.of.L.aspartate.and.L.asparagine.biosynthesis	OID20572	Egl nine homolog 1	Q9GZT9	EGLN1	Inflammation	MR-PRESSO	5	0.0566008	0.0505271	0.32534							rs113902391; rs12490065; rs2846765; rs820496; rs9545502		NA	NO
GCST90027451	ASPASN.PWY..superpathway.of.L.aspartate.and.L.asparagine.biosynthesis	OID20573	C-type lectin domain family 4 member A	Q9UMR7	CLEC4A	Inflammation	Inverse variance weighted	5	-0.0194708	0.0388618	0.616352				4.09294	4	0.393574	rs113902391; rs12490065; rs2846765; rs820496; rs9545502		0.801869629227591	NO
GCST90027451	ASPASN.PWY..superpathway.of.L.aspartate.and.L.asparagine.biosynthesis	OID20573	C-type lectin domain family 4 member A	Q9UMR7	CLEC4A	Inflammation	MR Egger	5	-0.529522	0.474336	0.345634	0.0473183	0.0438604	0.359669	2.92904	3	0.402695	rs113902391; rs12490065; rs2846765; rs820496; rs9545502		NA	NO
GCST90027451	ASPASN.PWY..superpathway.of.L.aspartate.and.L.asparagine.biosynthesis	OID20573	C-type lectin domain family 4 member A	Q9UMR7	CLEC4A	Inflammation	Weighted median	5	-0.0396326	0.0537017	0.460507							rs113902391; rs12490065; rs2846765; rs820496; rs9545502		NA	NO
GCST90027451	ASPASN.PWY..superpathway.of.L.aspartate.and.L.asparagine.biosynthesis	OID20573	C-type lectin domain family 4 member A	Q9UMR7	CLEC4A	Inflammation	MR-PRESSO	5	-0.0194708	0.0388618	0.642668							rs113902391; rs12490065; rs2846765; rs820496; rs9545502		NA	NO
GCST90027451	ASPASN.PWY..superpathway.of.L.aspartate.and.L.asparagine.biosynthesis	OID20574	Oncostatin-M	P13725	OSM	Inflammation	Inverse variance weighted	5	-0.00773942	0.0472712	0.869948				5.36898	4	0.251489	rs113902391; rs12490065; rs2846765; rs820496; rs9545502		0.944472364002717	NO
GCST90027451	ASPASN.PWY..superpathway.of.L.aspartate.and.L.asparagine.biosynthesis	OID20574	Oncostatin-M	P13725	OSM	Inflammation	MR Egger	5	-1.00829	0.503591	0.139029	0.0928182	0.0465631	0.140223	1.3954	3	0.706614	rs113902391; rs12490065; rs2846765; rs820496; rs9545502		NA	NO
GCST90027451	ASPASN.PWY..superpathway.of.L.aspartate.and.L.asparagine.biosynthesis	OID20574	Oncostatin-M	P13725	OSM	Inflammation	Weighted median	5	-0.0245229	0.0569913	0.666984							rs113902391; rs12490065; rs2846765; rs820496; rs9545502		NA	NO
GCST90027451	ASPASN.PWY..superpathway.of.L.aspartate.and.L.asparagine.biosynthesis	OID20574	Oncostatin-M	P13725	OSM	Inflammation	MR-PRESSO	5	-0.00773942	0.0472712	0.877888							rs113902391; rs12490065; rs2846765; rs820496; rs9545502		NA	NO
GCST90027451	ASPASN.PWY..superpathway.of.L.aspartate.and.L.asparagine.biosynthesis	OID20575	Corticosteroid 11-beta-dehydrogenase isozyme 1	P28845	HSD11B1	Inflammation	Inverse variance weighted	5	0.0128624	0.040994	0.753701				0.48307	4	0.975128	rs113902391; rs12490065; rs2846765; rs820496; rs9545502		0.987897580771295	NO
GCST90027451	ASPASN.PWY..superpathway.of.L.aspartate.and.L.asparagine.biosynthesis	OID20575	Corticosteroid 11-beta-dehydrogenase isozyme 1	P28845	HSD11B1	Inflammation	MR Egger	5	0.0393743	0.505869	0.94286	-0.00245939	0.0467729	0.961371	0.480305	3	0.923197	rs113902391; rs12490065; rs2846765; rs820496; rs9545502		NA	NO
GCST90027451	ASPASN.PWY..superpathway.of.L.aspartate.and.L.asparagine.biosynthesis	OID20575	Corticosteroid 11-beta-dehydrogenase isozyme 1	P28845	HSD11B1	Inflammation	Weighted median	5	-0.00144021	0.0503992	0.977203							rs113902391; rs12490065; rs2846765; rs820496; rs9545502		NA	NO
GCST90027451	ASPASN.PWY..superpathway.of.L.aspartate.and.L.asparagine.biosynthesis	OID20575	Corticosteroid 11-beta-dehydrogenase isozyme 1	P28845	HSD11B1	Inflammation	MR-PRESSO	5	0.0128624	0.0142461	0.417647							rs113902391; rs12490065; rs2846765; rs820496; rs9545502		NA	NO
GCST90027451	ASPASN.PWY..superpathway.of.L.aspartate.and.L.asparagine.biosynthesis	OID20576	Interleukin-4 receptor subunit alpha	P24394	IL4R	Inflammation	Inverse variance weighted	5	-0.0166667	0.0396182	0.673987				1.37305	4	0.848865	rs113902391; rs12490065; rs2846765; rs820496; rs9545502		0.791679582361844	NO
GCST90027451	ASPASN.PWY..superpathway.of.L.aspartate.and.L.asparagine.biosynthesis	OID20576	Interleukin-4 receptor subunit alpha	P24394	IL4R	Inflammation	MR Egger	5	0.532663	0.488884	0.355606	-0.0509579	0.0452016	0.34162	0.102139	3	0.991579	rs113902391; rs12490065; rs2846765; rs820496; rs9545502		NA	NO
GCST90027451	ASPASN.PWY..superpathway.of.L.aspartate.and.L.asparagine.biosynthesis	OID20576	Interleukin-4 receptor subunit alpha	P24394	IL4R	Inflammation	Weighted median	5	-0.00038566	0.0479187	0.993579							rs113902391; rs12490065; rs2846765; rs820496; rs9545502		NA	NO
GCST90027451	ASPASN.PWY..superpathway.of.L.aspartate.and.L.asparagine.biosynthesis	OID20576	Interleukin-4 receptor subunit alpha	P24394	IL4R	Inflammation	MR-PRESSO	5	-0.0166667	0.0232118	0.512444							rs113902391; rs12490065; rs2846765; rs820496; rs9545502		NA	NO
GCST90027451	ASPASN.PWY..superpathway.of.L.aspartate.and.L.asparagine.biosynthesis	OID20577	Interleukin-1 receptor-associated kinase 4	Q9NWZ3	IRAK4	Inflammation	Inverse variance weighted	5	0.0204466	0.0634215	0.747155				9.45535	4	0.0506728	rs113902391; rs12490065; rs2846765; rs820496; rs9545502		0.986952734446039	NO
GCST90027451	ASPASN.PWY..superpathway.of.L.aspartate.and.L.asparagine.biosynthesis	OID20577	Interleukin-1 receptor-associated kinase 4	Q9NWZ3	IRAK4	Inflammation	MR Egger	5	-0.534968	0.844404	0.57138	0.0515226	0.0780727	0.55644	8.25673	3	0.0409935	rs113902391; rs12490065; rs2846765; rs820496; rs9545502		NA	NO
GCST90027451	ASPASN.PWY..superpathway.of.L.aspartate.and.L.asparagine.biosynthesis	OID20577	Interleukin-1 receptor-associated kinase 4	Q9NWZ3	IRAK4	Inflammation	Weighted median	5	-0.009709	0.065244	0.881703							rs113902391; rs12490065; rs2846765; rs820496; rs9545502		NA	NO
GCST90027451	ASPASN.PWY..superpathway.of.L.aspartate.and.L.asparagine.biosynthesis	OID20577	Interleukin-1 receptor-associated kinase 4	Q9NWZ3	IRAK4	Inflammation	MR-PRESSO	5	0.0204466	0.0634215	0.763302							rs113902391; rs12490065; rs2846765; rs820496; rs9545502		NA	NO
GCST90027451	ASPASN.PWY..superpathway.of.L.aspartate.and.L.asparagine.biosynthesis	OID20578	Intercellular adhesion molecule 4	Q14773	ICAM4	Inflammation	Inverse variance weighted	5	-0.0418549	0.0497896	0.400552				7.99459	4	0.0917766	rs113902391; rs12490065; rs2846765; rs820496; rs9545502		0.737279663711517	NO
GCST90027451	ASPASN.PWY..superpathway.of.L.aspartate.and.L.asparagine.biosynthesis	OID20578	Intercellular adhesion molecule 4	Q14773	ICAM4	Inflammation	MR Egger	5	-0.31144	0.689875	0.682307	0.025005	0.0637767	0.721199	7.60491	3	0.0549232	rs113902391; rs12490065; rs2846765; rs820496; rs9545502		NA	NO
GCST90027451	ASPASN.PWY..superpathway.of.L.aspartate.and.L.asparagine.biosynthesis	OID20578	Intercellular adhesion molecule 4	Q14773	ICAM4	Inflammation	Weighted median	5	-0.00163952	0.0520093	0.974852							rs113902391; rs12490065; rs2846765; rs820496; rs9545502		NA	NO
GCST90027451	ASPASN.PWY..superpathway.of.L.aspartate.and.L.asparagine.biosynthesis	OID20578	Intercellular adhesion molecule 4	Q14773	ICAM4	Inflammation	MR-PRESSO	5	-0.0418549	0.0497896	0.447866							rs113902391; rs12490065; rs2846765; rs820496; rs9545502		NA	NO
GCST90027451	ASPASN.PWY..superpathway.of.L.aspartate.and.L.asparagine.biosynthesis	OID20579	2,4-dienoyl-CoA reductase, mitochondrial	Q16698	DECR1	Inflammation	Inverse variance weighted	5	0.0275037	0.0629528	0.662189				9.20461	4	0.0561838	rs113902391; rs12490065; rs2846765; rs820496; rs9545502		0.938694321215044	NO
GCST90027451	ASPASN.PWY..superpathway.of.L.aspartate.and.L.asparagine.biosynthesis	OID20579	2,4-dienoyl-CoA reductase, mitochondrial	Q16698	DECR1	Inflammation	MR Egger	5	-0.665508	0.802139	0.467578	0.0642867	0.074165	0.449818	7.36103	3	0.0612387	rs113902391; rs12490065; rs2846765; rs820496; rs9545502		NA	NO
GCST90027451	ASPASN.PWY..superpathway.of.L.aspartate.and.L.asparagine.biosynthesis	OID20579	2,4-dienoyl-CoA reductase, mitochondrial	Q16698	DECR1	Inflammation	Weighted median	5	0.00279286	0.0673793	0.966937							rs113902391; rs12490065; rs2846765; rs820496; rs9545502		NA	NO
GCST90027451	ASPASN.PWY..superpathway.of.L.aspartate.and.L.asparagine.biosynthesis	OID20579	2,4-dienoyl-CoA reductase, mitochondrial	Q16698	DECR1	Inflammation	MR-PRESSO	5	0.0275037	0.0629528	0.684739							rs113902391; rs12490065; rs2846765; rs820496; rs9545502		NA	NO
GCST90027451	ASPASN.PWY..superpathway.of.L.aspartate.and.L.asparagine.biosynthesis	OID20580	Lymphocyte antigen 75	O60449	LY75	Inflammation	Inverse variance weighted	5	-0.0197111	0.0308082	0.522302				4.66054	4	0.323933	rs113902391; rs12490065; rs2846765; rs820496; rs9545502		0.805215596307006	NO
GCST90027451	ASPASN.PWY..superpathway.of.L.aspartate.and.L.asparagine.biosynthesis	OID20580	Lymphocyte antigen 75	O60449	LY75	Inflammation	MR Egger	5	0.0974711	0.43385	0.836672	-0.0108707	0.0401148	0.803976	4.54919	3	0.207945	rs113902391; rs12490065; rs2846765; rs820496; rs9545502		NA	NO
GCST90027451	ASPASN.PWY..superpathway.of.L.aspartate.and.L.asparagine.biosynthesis	OID20580	Lymphocyte antigen 75	O60449	LY75	Inflammation	Weighted median	5	0.0125227	0.0375481	0.738749							rs113902391; rs12490065; rs2846765; rs820496; rs9545502		NA	NO
GCST90027451	ASPASN.PWY..superpathway.of.L.aspartate.and.L.asparagine.biosynthesis	OID20580	Lymphocyte antigen 75	O60449	LY75	Inflammation	MR-PRESSO	5	-0.0197111	0.0308082	0.557108							rs113902391; rs12490065; rs2846765; rs820496; rs9545502		NA	NO
GCST90027451	ASPASN.PWY..superpathway.of.L.aspartate.and.L.asparagine.biosynthesis	OID20581	Integrin alpha-11	Q9UKX5	ITGA11	Inflammation	Inverse variance weighted	5	0.0120701	0.0399705	0.762672				3.1219	4	0.537636	rs113902391; rs12490065; rs2846765; rs820496; rs9545502		0.952162524233438	NO
GCST90027451	ASPASN.PWY..superpathway.of.L.aspartate.and.L.asparagine.biosynthesis	OID20581	Integrin alpha-11	Q9UKX5	ITGA11	Inflammation	MR Egger	5	0.028785	0.503042	0.957967	-0.00155058	0.046512	0.9755	3.12075	3	0.37338	rs113902391; rs12490065; rs2846765; rs820496; rs9545502		NA	NO
GCST90027451	ASPASN.PWY..superpathway.of.L.aspartate.and.L.asparagine.biosynthesis	OID20581	Integrin alpha-11	Q9UKX5	ITGA11	Inflammation	Weighted median	5	0.0473549	0.0516564	0.359286							rs113902391; rs12490065; rs2846765; rs820496; rs9545502		NA	NO
GCST90027451	ASPASN.PWY..superpathway.of.L.aspartate.and.L.asparagine.biosynthesis	OID20581	Integrin alpha-11	Q9UKX5	ITGA11	Inflammation	MR-PRESSO	5	0.0120701	0.0353118	0.749694							rs113902391; rs12490065; rs2846765; rs820496; rs9545502		NA	NO
GCST90027451	ASPASN.PWY..superpathway.of.L.aspartate.and.L.asparagine.biosynthesis	OID20582	Axin-1	O15169	AXIN1	Inflammation	Inverse variance weighted	5	0.0036734	0.0679293	0.956874				11.2519	4	0.0238743	rs113902391; rs12490065; rs2846765; rs820496; rs9545502		0.956874027506734	NO
GCST90027451	ASPASN.PWY..superpathway.of.L.aspartate.and.L.asparagine.biosynthesis	OID20582	Axin-1	O15169	AXIN1	Inflammation	MR Egger	5	-0.624035	0.897051	0.536693	0.05823	0.0829421	0.533211	9.66414	3	0.0216478	rs113902391; rs12490065; rs2846765; rs820496; rs9545502		NA	NO
GCST90027451	ASPASN.PWY..superpathway.of.L.aspartate.and.L.asparagine.biosynthesis	OID20582	Axin-1	O15169	AXIN1	Inflammation	Weighted median	5	-0.0735436	0.05985	0.219147							rs113902391; rs12490065; rs2846765; rs820496; rs9545502		NA	NO
GCST90027451	ASPASN.PWY..superpathway.of.L.aspartate.and.L.asparagine.biosynthesis	OID20582	Axin-1	O15169	AXIN1	Inflammation	MR-PRESSO	5	0.0036734	0.0679293	0.959467							rs113902391; rs12490065; rs2846765; rs820496; rs9545502		NA	NO
GCST90027451	ASPASN.PWY..superpathway.of.L.aspartate.and.L.asparagine.biosynthesis	OID20583	Annexin A11	P50995	ANXA11	Inflammation	Inverse variance weighted	5	0.0174133	0.0465784	0.708517				5.07404	4	0.279785	rs113902391; rs12490065; rs2846765; rs820496; rs9545502		0.990529676652595	NO
GCST90027451	ASPASN.PWY..superpathway.of.L.aspartate.and.L.asparagine.biosynthesis	OID20583	Annexin A11	P50995	ANXA11	Inflammation	MR Egger	5	-0.33225	0.632231	0.63559	0.0324371	0.0584572	0.61766	4.60175	3	0.203392	rs113902391; rs12490065; rs2846765; rs820496; rs9545502		NA	NO
GCST90027451	ASPASN.PWY..superpathway.of.L.aspartate.and.L.asparagine.biosynthesis	OID20583	Annexin A11	P50995	ANXA11	Inflammation	Weighted median	5	-0.0156236	0.0575489	0.786019							rs113902391; rs12490065; rs2846765; rs820496; rs9545502		NA	NO
GCST90027451	ASPASN.PWY..superpathway.of.L.aspartate.and.L.asparagine.biosynthesis	OID20583	Annexin A11	P50995	ANXA11	Inflammation	MR-PRESSO	5	0.0174133	0.0465784	0.727489							rs113902391; rs12490065; rs2846765; rs820496; rs9545502		NA	NO
GCST90027451	ASPASN.PWY..superpathway.of.L.aspartate.and.L.asparagine.biosynthesis	OID20584	T-cell surface glycoprotein CD4	P01730	CD4	Inflammation	Inverse variance weighted	5	-0.0248012	0.0490157	0.612867				6.07932	4	0.193303	rs113902391; rs12490065; rs2846765; rs820496; rs9545502		0.872333952484949	NO
GCST90027451	ASPASN.PWY..superpathway.of.L.aspartate.and.L.asparagine.biosynthesis	OID20584	T-cell surface glycoprotein CD4	P01730	CD4	Inflammation	MR Egger	5	-0.621311	0.60709	0.381429	0.0553334	0.0561297	0.39691	4.59183	3	0.204244	rs113902391; rs12490065; rs2846765; rs820496; rs9545502		NA	NO
GCST90027451	ASPASN.PWY..superpathway.of.L.aspartate.and.L.asparagine.biosynthesis	OID20310	Receptor-type tyrosine-protein phosphatase F	P10586	PTPRF	Cardiometabolic	MR Egger	5	0.133346	0.486564	0.801828	-0.011903	0.0449875	0.808465	2.02739	3	0.56674	rs113902391; rs12490065; rs2846765; rs820496; rs9545502		NA	NO
GCST90027451	ASPASN.PWY..superpathway.of.L.aspartate.and.L.asparagine.biosynthesis	OID20310	Receptor-type tyrosine-protein phosphatase F	P10586	PTPRF	Cardiometabolic	Weighted median	5	0.00348527	0.0515307	0.946076							rs113902391; rs12490065; rs2846765; rs820496; rs9545502		NA	NO
GCST90027451	ASPASN.PWY..superpathway.of.L.aspartate.and.L.asparagine.biosynthesis	OID20310	Receptor-type tyrosine-protein phosphatase F	P10586	PTPRF	Cardiometabolic	MR-PRESSO	5	0.00503169	0.0285558	0.868694							rs113902391; rs12490065; rs2846765; rs820496; rs9545502		NA	NO
GCST90027451	ASPASN.PWY..superpathway.of.L.aspartate.and.L.asparagine.biosynthesis	OID20311	Neurogenic locus notch homolog protein 1	P46531	NOTCH1	Cardiometabolic	Inverse variance weighted	5	0.0125481	0.0544495	0.817739				7.35801	4	0.118136	rs113902391; rs12490065; rs2846765; rs820496; rs9545502		0.97930166730803	NO
GCST90027451	ASPASN.PWY..superpathway.of.L.aspartate.and.L.asparagine.biosynthesis	OID20311	Neurogenic locus notch homolog protein 1	P46531	NOTCH1	Cardiometabolic	MR Egger	5	-0.0947191	0.771201	0.910015	0.00994938	0.0712948	0.897855	7.31055	3	0.0626312	rs113902391; rs12490065; rs2846765; rs820496; rs9545502		NA	NO
GCST90027451	ASPASN.PWY..superpathway.of.L.aspartate.and.L.asparagine.biosynthesis	OID20311	Neurogenic locus notch homolog protein 1	P46531	NOTCH1	Cardiometabolic	Weighted median	5	-0.000190047	0.0581421	0.997392							rs113902391; rs12490065; rs2846765; rs820496; rs9545502		NA	NO
GCST90027451	ASPASN.PWY..superpathway.of.L.aspartate.and.L.asparagine.biosynthesis	OID20311	Neurogenic locus notch homolog protein 1	P46531	NOTCH1	Cardiometabolic	MR-PRESSO	5	0.0125481	0.0544495	0.829045							rs113902391; rs12490065; rs2846765; rs820496; rs9545502		NA	NO
GCST90027451	ASPASN.PWY..superpathway.of.L.aspartate.and.L.asparagine.biosynthesis	OID20312	Chitotriosidase-1	Q13231	CHIT1	Cardiometabolic	Inverse variance weighted	5	-0.0590745	0.0296319	0.0461943				1.7685	4	0.778239	rs113902391; rs12490065; rs2846765; rs820496; rs9545502		0.854594839618675	NO
GCST90027451	ASPASN.PWY..superpathway.of.L.aspartate.and.L.asparagine.biosynthesis	OID20312	Chitotriosidase-1	Q13231	CHIT1	Cardiometabolic	MR Egger	5	0.195187	0.365725	0.630562	-0.0235873	0.033816	0.535676	1.28197	3	0.733419	rs113902391; rs12490065; rs2846765; rs820496; rs9545502		NA	NO
GCST90027451	ASPASN.PWY..superpathway.of.L.aspartate.and.L.asparagine.biosynthesis	OID20312	Chitotriosidase-1	Q13231	CHIT1	Cardiometabolic	Weighted median	5	-0.0580169	0.0376649	0.123477							rs113902391; rs12490065; rs2846765; rs820496; rs9545502		NA	NO
GCST90027451	ASPASN.PWY..superpathway.of.L.aspartate.and.L.asparagine.biosynthesis	OID20312	Chitotriosidase-1	Q13231	CHIT1	Cardiometabolic	MR-PRESSO	5	-0.0590745	0.019703	0.0400109							rs113902391; rs12490065; rs2846765; rs820496; rs9545502		NA	NO
GCST90027451	ASPASN.PWY..superpathway.of.L.aspartate.and.L.asparagine.biosynthesis	OID20313	Platelet-derived growth factor subunit A	P04085	PDGFA	Cardiometabolic	Inverse variance weighted	5	0.00760307	0.0407827	0.852108				0.850489	4	0.931554	rs113902391; rs12490065; rs2846765; rs820496; rs9545502		0.915115475298625	NO
GCST90027451	ASPASN.PWY..superpathway.of.L.aspartate.and.L.asparagine.biosynthesis	OID20313	Platelet-derived growth factor subunit A	P04085	PDGFA	Cardiometabolic	MR Egger	5	-0.205311	0.502996	0.710529	0.0197509	0.0465067	0.69968	0.670127	3	0.880207	rs113902391; rs12490065; rs2846765; rs820496; rs9545502		NA	NO
GCST90027451	ASPASN.PWY..superpathway.of.L.aspartate.and.L.asparagine.biosynthesis	OID20313	Platelet-derived growth factor subunit A	P04085	PDGFA	Cardiometabolic	Weighted median	5	0.0138337	0.0465149	0.766159							rs113902391; rs12490065; rs2846765; rs820496; rs9545502		NA	NO
GCST90027451	ASPASN.PWY..superpathway.of.L.aspartate.and.L.asparagine.biosynthesis	OID20313	Platelet-derived growth factor subunit A	P04085	PDGFA	Cardiometabolic	MR-PRESSO	5	0.00760307	0.0188053	0.706673							rs113902391; rs12490065; rs2846765; rs820496; rs9545502		NA	NO
GCST90027451	ASPASN.PWY..superpathway.of.L.aspartate.and.L.asparagine.biosynthesis	OID20314	Tartrate-resistant acid phosphatase type 5	P13686	ACP5	Cardiometabolic	Inverse variance weighted	5	-0.0455656	0.037544	0.224878				1.75341	4	0.780994	rs113902391; rs12490065; rs2846765; rs820496; rs9545502		0.594320995360736	NO
[truncated: 205,094+ more rows]

[truncated: 9 more sheets: j.ReverseMR_IP, k.IP_Replication, l.MR_Ischemic, m.MR_Lifespan, n.MR_Longevity, o.MR_Osteoporosis, p.MR_ParentalLongevity, q.MR_T2D, r.SVs]
