# Supplementary material for: Causal relationships between gut microbiome and hundreds of age-related traits: evidence of a replicable effect on ApoM protein levels
Source: Aging (Albany NY). 2025 Aug 1;17(8):1966–87. doi: 10.18632/aging.206293 (PMC12422825; doi:10.18632/aging.206293)
Supplement: Supplementary Table 3 [file aging-17-8-206293-s004.xlsx]

## Sheet: Comparison with Chen's data
Supplementary Table 3. Comparison between Chen et al.'s, (2024) significant results and those we obtained with our pipeline for the same exposure-outcome pairs. This table contains the results of MR reported in Chen et al’s 2024 and analyzed the results of MR for the same exposure-outcome pairs obtained with our pipeline.
Legend: Comparison between Chen et al.'s, (2024) reported significant results and those we obtained with our pipeline for the same exposure-outcome pairs. We were able to match names of exposure only for 12 out of the 168 significant exposure-outcome pairs present in Chen's al. 2024. In fact we have used fewer exposures since we considered only the 37 taxa with at least a genome-wide significant …
		Chen et al. (2024)'s significant results that we also have										Our results
Exposure	Outcome	method	Nsnp	β	se	pval	OR	OR_lci95	OR_uci95	heterogeneity (Q_pval)	pleiotropy (P for Egger intercept)	method2	nsnp2	b	se2	pval2	egger_intercept.ple	se.ple	pval.ple	Q.het	Q_df.het	Q_pval.het	pval_adj	IV_list	Significant for us
PWY.7209..superpathway.of.pyrimidine.ribonucleosides.degradation	lifespan	Inverse variance weighted (fixed effects)	16	0.0223287	0.0104389	0.0324363	1.02258	1.00187	1.04372	0.0724603		Inverse variance weighted	10	0.0388193	0.0171719	0.0237826				15.9578	9	0.0677671	0.879957	rs10489050; rs11215429; rs11242123; rs1474383; rs261555; rs4783336; rs617079; rs6587723; rs6805759; rs836868	YES
PWY.7209..superpathway.of.pyrimidine.ribonucleosides.degradation	lifespan	Maximum likelihood	16	0.0230701	0.010938	0.0349305	1.02334	1.00163	1.04551			Weighted median	10	0.0151493	0.0189253	0.423435								rs10489050; rs11215429; rs11242123; rs1474383; rs261555; rs4783336; rs617079; rs6587723; rs6805759; rs836868	NO
PWY.7209..superpathway.of.pyrimidine.ribonucleosides.degradation	lifespan	MR Egger	16	0.053788	0.049713	0.297551	1.05526	0.957289	1.16326		0.521879	MR Egger	10	0.0279505	0.0604515	0.656136	0.00142464	0.00755721	0.855168					rs10489050; rs11215429; rs11242123; rs1474383; rs261555; rs4783336; rs617079; rs6587723; rs6805759; rs836868	NO
PWY.7209..superpathway.of.pyrimidine.ribonucleosides.degradation	lifespan	Simple median	16	0.0136312	0.0147409	0.355111	1.01372	0.984855	1.04344			MR-PRESSO	10	0.0388193	0.0171719	0.0501256								rs10489050; rs11215429; rs11242123; rs1474383; rs261555; rs4783336; rs617079; rs6587723; rs6805759; rs836868	NO
PWY.7209..superpathway.of.pyrimidine.ribonucleosides.degradation	lifespan	Weighted median	16	0.010717	0.0148888	0.471645	1.01077	0.981704	1.04071
ENTBACSYN.PWY..enterobactin.biosynthesis	lifespan	Inverse variance weighted (fixed effects)	2	-0.0394531	0.0179274	0.0277558	0.961315	0.928123	0.995694	0.991695		Wald ratio	1	-0.0395991	0.0227614	0.0819029							0.890817	rs706111	NO
ENTBACSYN.PWY..enterobactin.biosynthesis	lifespan	Maximum likelihood	2	-0.0394511	0.0188628	0.0364859	0.961317	0.926425	0.997523
PWY.5088..L.glutamate.degradation.VIII..to.propanoate.	Parental longevity (father's attained age)	Inverse variance weighted	6	0.0150731	0.00580921	0.00946785	1.01519	1.00369	1.02681	0.369861		Inverse variance weighted	3	-0.010714	0.0243695	0.660194				20.4814	2	3.56887e-05	0.980653	rs12028490; rs2127754; rs9927590	NO
PWY.5088..L.glutamate.degradation.VIII..to.propanoate.	Parental longevity (father's attained age)	MR Egger	6	0.0231229	0.0280358	0.455849	1.02339	0.968674	1.0812		0.782686	MR Egger	3	-0.0403216	0.105841	0.768277	0.00714069	0.0242492	0.817687					rs12028490; rs2127754; rs9927590	NO
PWY.5088..L.glutamate.degradation.VIII..to.propanoate.	Parental longevity (father's attained age)	Weighted median	6	0.0151959	0.00732503	0.0380315	1.01531	1.00084	1.02999			MR-PRESSO	3											rs12028490; rs2127754; rs9927590	NO
PWY.5088..L.glutamate.degradation.VIII..to.propanoate.	Parental longevity (father's attained age)	Simple median	6	0.0167985	0.00749782	0.0250619	1.01694	1.0021	1.032			Weighted median	3	-0.00491758	0.0137795	0.721185								rs12028490; rs2127754; rs9927590	NO
PWY.7209..superpathway.of.pyrimidine.ribonucleosides.degradation	Parental longevity (mother's attained age)	Inverse variance weighted	15	-0.0159243	0.00774163	0.0396889	0.984202	0.969381	0.99925	0.0624762		Inverse variance weighted	9	-0.0265963	0.0101551	0.00881832				14.36	8	0.0728504	0.169284	rs10489050; rs11215429; rs11242123; rs1474383; rs261555; rs4783336; rs617079; rs6587723; rs836868	YES
PWY.7209..superpathway.of.pyrimidine.ribonucleosides.degradation	Parental longevity (mother's attained age)	MR Egger	15	-0.0396067	0.02815	0.182887	0.961167	0.909572	1.01569		0.397116	MR Egger	9	-0.018969	0.0354942	0.609595	-0.00104441	0.00462903	0.827941					rs10489050; rs11215429; rs11242123; rs1474383; rs261555; rs4783336; rs617079; rs6587723; rs836868	NO
PWY.7209..superpathway.of.pyrimidine.ribonucleosides.degradation	Parental longevity (mother's attained age)	Weighted median	15	-0.0080057	0.00890593	0.368697	0.992026	0.97486	1.00949			MR-PRESSO	9	-0.0265963	0.0101551	0.0306972								rs10489050; rs11215429; rs11242123; rs1474383; rs261555; rs4783336; rs617079; rs6587723; rs836868	YES
PWY.7209..superpathway.of.pyrimidine.ribonucleosides.degradation	Parental longevity (mother's attained age)	Simple median	15	-0.00827285	0.00924761	0.371005	0.991761	0.973947	1.0099			Weighted median	9	-0.0107553	0.0110406	0.329978								rs10489050; rs11215429; rs11242123; rs1474383; rs261555; rs4783336; rs617079; rs6587723; rs836868	NO
ENTBACSYN.PWY..enterobactin.biosynthesis	lifespan	Inverse variance weighted (fixed effects)	2	-0.0394531	0.0179274	0.0277558	0.961315	0.928123	0.995694	0.991695		Wald ratio	1	-0.0395991	0.0227614	0.0819029							0.890817	rs706111	NO
ENTBACSYN.PWY..enterobactin.biosynthesis	lifespan	Maximum likelihood	2	-0.0394511	0.0188628	0.0364859	0.961317	0.926425	0.997523
ENTBACSYN.PWY..enterobactin.biosynthesis	Parental longevity (mother's attained age)	Inverse variance weighted	2	0.0303477	0.0101199	0.00271033	1.03081	1.01057	1.05146	0.682903		Wald ratio	1	0.0336135	0.0128966	0.0091505							0.169284	rs706111	YES but not IVW
ENTBACSYN.PWY..enterobactin.biosynthesis	Parental longevity (mother's age at death)	Inverse variance weighted	2	-0.0328483	0.0127861	0.0101971	0.967685	0.943736	0.992243	0.356126		Wald ratio	1	-0.0235332	0.0162907	0.148576							0.586972	rs706111	NO
PWY_REDCITCYC..TCA.cycle.VIII..helicobacter.	lifespan	Inverse variance weighted (fixed effects)	11	-0.030159	0.0111311	0.00673987	0.970291	0.949352	0.991693	0.087253		Inverse variance weighted	7	-0.0213254	0.0204488	0.29701				13.5042	6	0.0356925	0.890817	rs10159356; rs12035973; rs2420153; rs3923652; rs61545203; rs8057488; rs9965721	NO
PWY_REDCITCYC..TCA.cycle.VIII..helicobacter.	lifespan	Maximum likelihood	11	-0.0304649	0.0116796	0.00909689	0.969994	0.948042	0.992456
PWY_REDCITCYC..TCA.cycle.VIII..helicobacter.	lifespan	Simple median	11	-0.0430887	0.0167036	0.00989144	0.957826	0.926976	0.989704			MR-PRESSO	7	-0.0213254	0.0204488	0.337195								rs10159356; rs12035973; rs2420153; rs3923652; rs61545203; rs8057488; rs9965721	NO
PWY_REDCITCYC..TCA.cycle.VIII..helicobacter.	lifespan	Weighted median	11	-0.0403854	0.0157988	0.0105811	0.960419	0.931135	0.990624			Weighted median	7	-0.0223357	0.0224941	0.32073								rs10159356; rs12035973; rs2420153; rs3923652; rs61545203; rs8057488; rs9965721	NO
PWY_REDCITCYC..TCA.cycle.VIII..helicobacter.	lifespan	MR Egger	11	-0.0274921	0.0614004	0.664916	0.972882	0.862572	1.0973		0.965244	MR Egger	7	-0.0617272	0.102501	0.573297	0.00633877	0.0157053	0.703184					rs10159356; rs12035973; rs2420153; rs3923652; rs61545203; rs8057488; rs9965721	NO
PWY.7209..superpathway.of.pyrimidine.ribonucleosides.degradation	Parental longevity (combined parental attained age, Martingale residuals)	Inverse variance weighted	15	-0.0128617	0.00644869	0.0461003	0.987221	0.974821	0.999778	0.368456		Inverse variance weighted	9	-0.0213878	0.00892229	0.0165247				10.58	8	0.226649	0.594023	rs10489050; rs11215429; rs11242123; rs1474383; rs261555; rs4783336; rs617079; rs6587723; rs836868	YES
PWY.7209..superpathway.of.pyrimidine.ribonucleosides.degradation	Parental longevity (combined parental attained age, Martingale residuals)	MR Egger	15	-0.0228391	0.023954	0.357753	0.97742	0.932591	1.0244		0.671736	MR Egger	9	-0.000238314	0.0301482	0.993914	-0.00289617	0.00393202	0.485336					rs10489050; rs11215429; rs11242123; rs1474383; rs261555; rs4783336; rs617079; rs6587723; rs836868	NO
PWY.7209..superpathway.of.pyrimidine.ribonucleosides.degradation	Parental longevity (combined parental attained age, Martingale residuals)	Weighted median	15	-0.00485505	0.0084793	0.566931	0.995157	0.978754	1.01183			MR-PRESSO	9	-0.0213878	0.00892229	0.0433714								rs10489050; rs11215429; rs11242123; rs1474383; rs261555; rs4783336; rs617079; rs6587723; rs836868	YES
PWY.7209..superpathway.of.pyrimidine.ribonucleosides.degradation	Parental longevity (combined parental attained age, Martingale residuals)	Simple median	15	-0.00486748	0.00862406	0.572477	0.995144	0.978465	1.01211			Weighted median	9	-0.00575455	0.0106816	0.59007								rs10489050; rs11215429; rs11242123; rs1474383; rs261555; rs4783336; rs617079; rs6587723; rs836868	NO
PWY_REDCITCYC..TCA.cycle.VIII..helicobacter.	Parental longevity (both parents in top 10%)	Inverse variance weighted	10	-0.0152402	0.00590866	0.00990019	0.984875	0.973535	0.996347	0.895844		Inverse variance weighted	6	-0.0127341	0.00739067	0.0848895				2.73298	5	0.741069	0.633178	rs10159356; rs12035973; rs3923652; rs61545203; rs8057488; rs9965721	NO
PWY_REDCITCYC..TCA.cycle.VIII..helicobacter.	Parental longevity (both parents in top 10%)	MR Egger	10	-0.0124448	0.0258018	0.642497	0.987632	0.938928	1.03886		0.91412	MR Egger	6	-0.0257368	0.0366001	0.520709	0.00197084	0.00543323	0.735155					rs10159356; rs12035973; rs3923652; rs61545203; rs8057488; rs9965721	NO
PWY_REDCITCYC..TCA.cycle.VIII..helicobacter.	Parental longevity (both parents in top 10%)	Weighted median	10	-0.0174686	0.00749678	0.0197983	0.982683	0.968349	0.997229			Weighted median	6	-0.0179569	0.0091148	0.048829								rs10159356; rs12035973; rs3923652; rs61545203; rs8057488; rs9965721	YES but not IVW
PWY_REDCITCYC..TCA.cycle.VIII..helicobacter.	Parental longevity (both parents in top 10%)	Simple median	10	-0.0174498	0.00785261	0.0262722	0.982702	0.967693	0.997943			MR-PRESSO	6	-0.0127341	0.00546408	0.0671689								rs10159356; rs12035973; rs3923652; rs61545203; rs8057488; rs9965721	NO
PWY_REDCITCYC..TCA.cycle.VIII..helicobacter.	Parental longevity (mother's age at death)	Inverse variance weighted	10	-0.0206385	0.00845361	0.0146312	0.979573	0.963476	0.995939	0.397707		Inverse variance weighted	6	-0.0180692	0.0103331	0.0803473				2.94805	5	0.707994	0.495475	rs10159356; rs12035973; rs3923652; rs61545203; rs8057488; rs9965721	NO
PWY_REDCITCYC..TCA.cycle.VIII..helicobacter.	Parental longevity (mother's age at death)	MR Egger	10	-0.0740757	0.0360825	0.0741673	0.928601	0.865198	0.996652		0.166674	MR Egger	6	-0.0770121	0.0511683	0.206757	0.00892839	0.00759105	0.304746					rs10159356; rs12035973; rs3923652; rs61545203; rs8057488; rs9965721	NO
PWY_REDCITCYC..TCA.cycle.VIII..helicobacter.	Parental longevity (mother's age at death)	Weighted median	10	-0.0161694	0.0116951	0.166795	0.983961	0.961662	1.00678			Weighted median	6	-0.0185171	0.0135893	0.173002								rs10159356; rs12035973; rs3923652; rs61545203; rs8057488; rs9965721	NO
PWY_REDCITCYC..TCA.cycle.VIII..helicobacter.	Parental longevity (mother's age at death)	Simple median	10	-0.0248936	0.011358	0.0283996	0.975414	0.953939	0.997372			MR-PRESSO	6	-0.0180692	0.00793435	0.0717772								rs10159356; rs12035973; rs3923652; rs61545203; rs8057488; rs9965721	NO
PWY_REDCITCYC..TCA.cycle.VIII..helicobacter.	Parental longevity (combined parental age at death)	Inverse variance weighted	10	-0.0194436	0.00976131	0.0463816	0.980744	0.962159	0.999689	0.878448		Inverse variance weighted	6	-0.0144426	0.0122193	0.237227				1.73074	5	0.885005	0.673169	rs10159356; rs12035973; rs3923652; rs61545203; rs8057488; rs9965721	NO
PWY_REDCITCYC..TCA.cycle.VIII..helicobacter.	Parental longevity (combined parental age at death)	MR Egger	10	-0.0471262	0.0426485	0.301286	0.953967	0.877466	1.03714		0.523669	MR Egger	6	-0.0641596	0.0604722	0.348513	0.00753247	0.00897296	0.448452					rs10159356; rs12035973; rs3923652; rs61545203; rs8057488; rs9965721	NO
PWY_REDCITCYC..TCA.cycle.VIII..helicobacter.	Parental longevity (combined parental age at death)	Weighted median	10	-0.0172135	0.0125979	0.171819	0.982934	0.958961	1.00751			Weighted median	6	-0.0176921	0.0147949	0.231767								rs10159356; rs12035973; rs3923652; rs61545203; rs8057488; rs9965721	NO
PWY_REDCITCYC..TCA.cycle.VIII..helicobacter.	Parental longevity (combined parental age at death)	Simple median	10	-0.0207446	0.0123577	0.093214	0.979469	0.95603	1.00348			MR-PRESSO	6	-0.0144426	0.00718915	0.100782								rs10159356; rs12035973; rs3923652; rs61545203; rs8057488; rs9965721	NO
